# Supplementary material
Source: PubMed Central journal article supplement (PMC7121232)

# Data S2

Thin section overview, BSE  
images of chondrules, and  
position of SIMS analyses

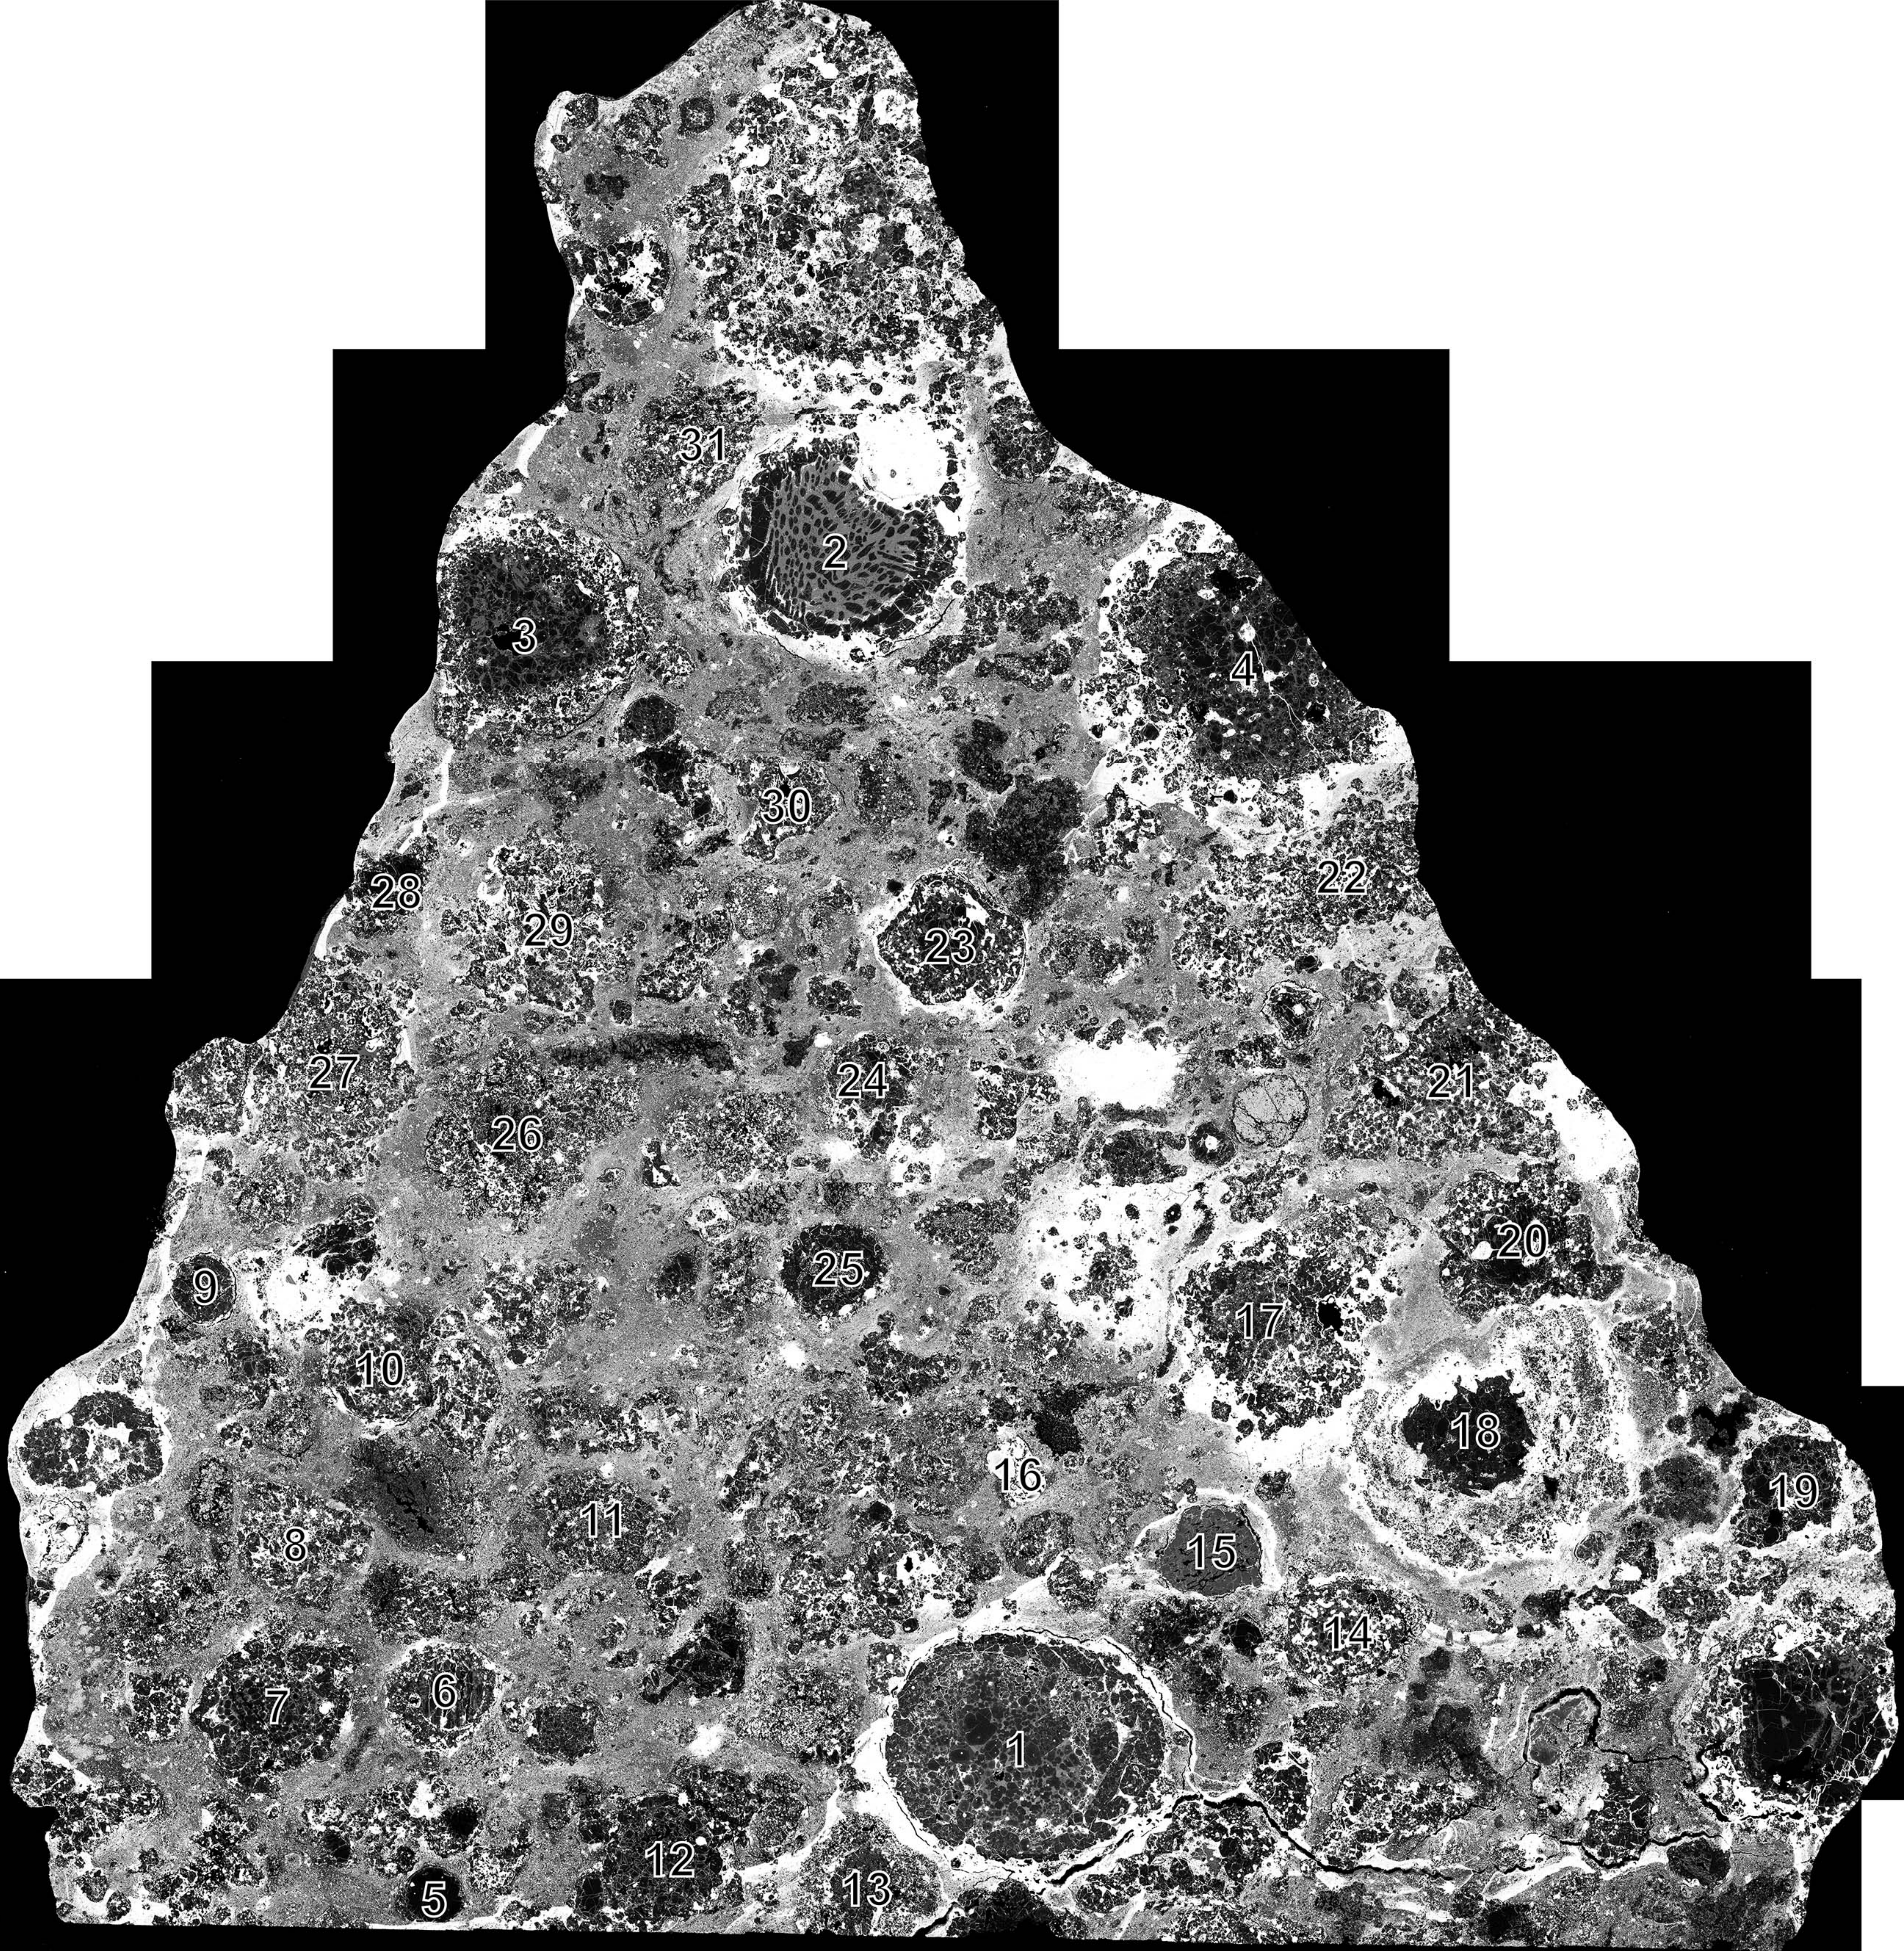

31

2

3

4

30

28

29

23'

22

27

24

21

26

25

20

9

17

10

18

19

8

11

16

15

7

6

14

1

12

13

5

**N1**

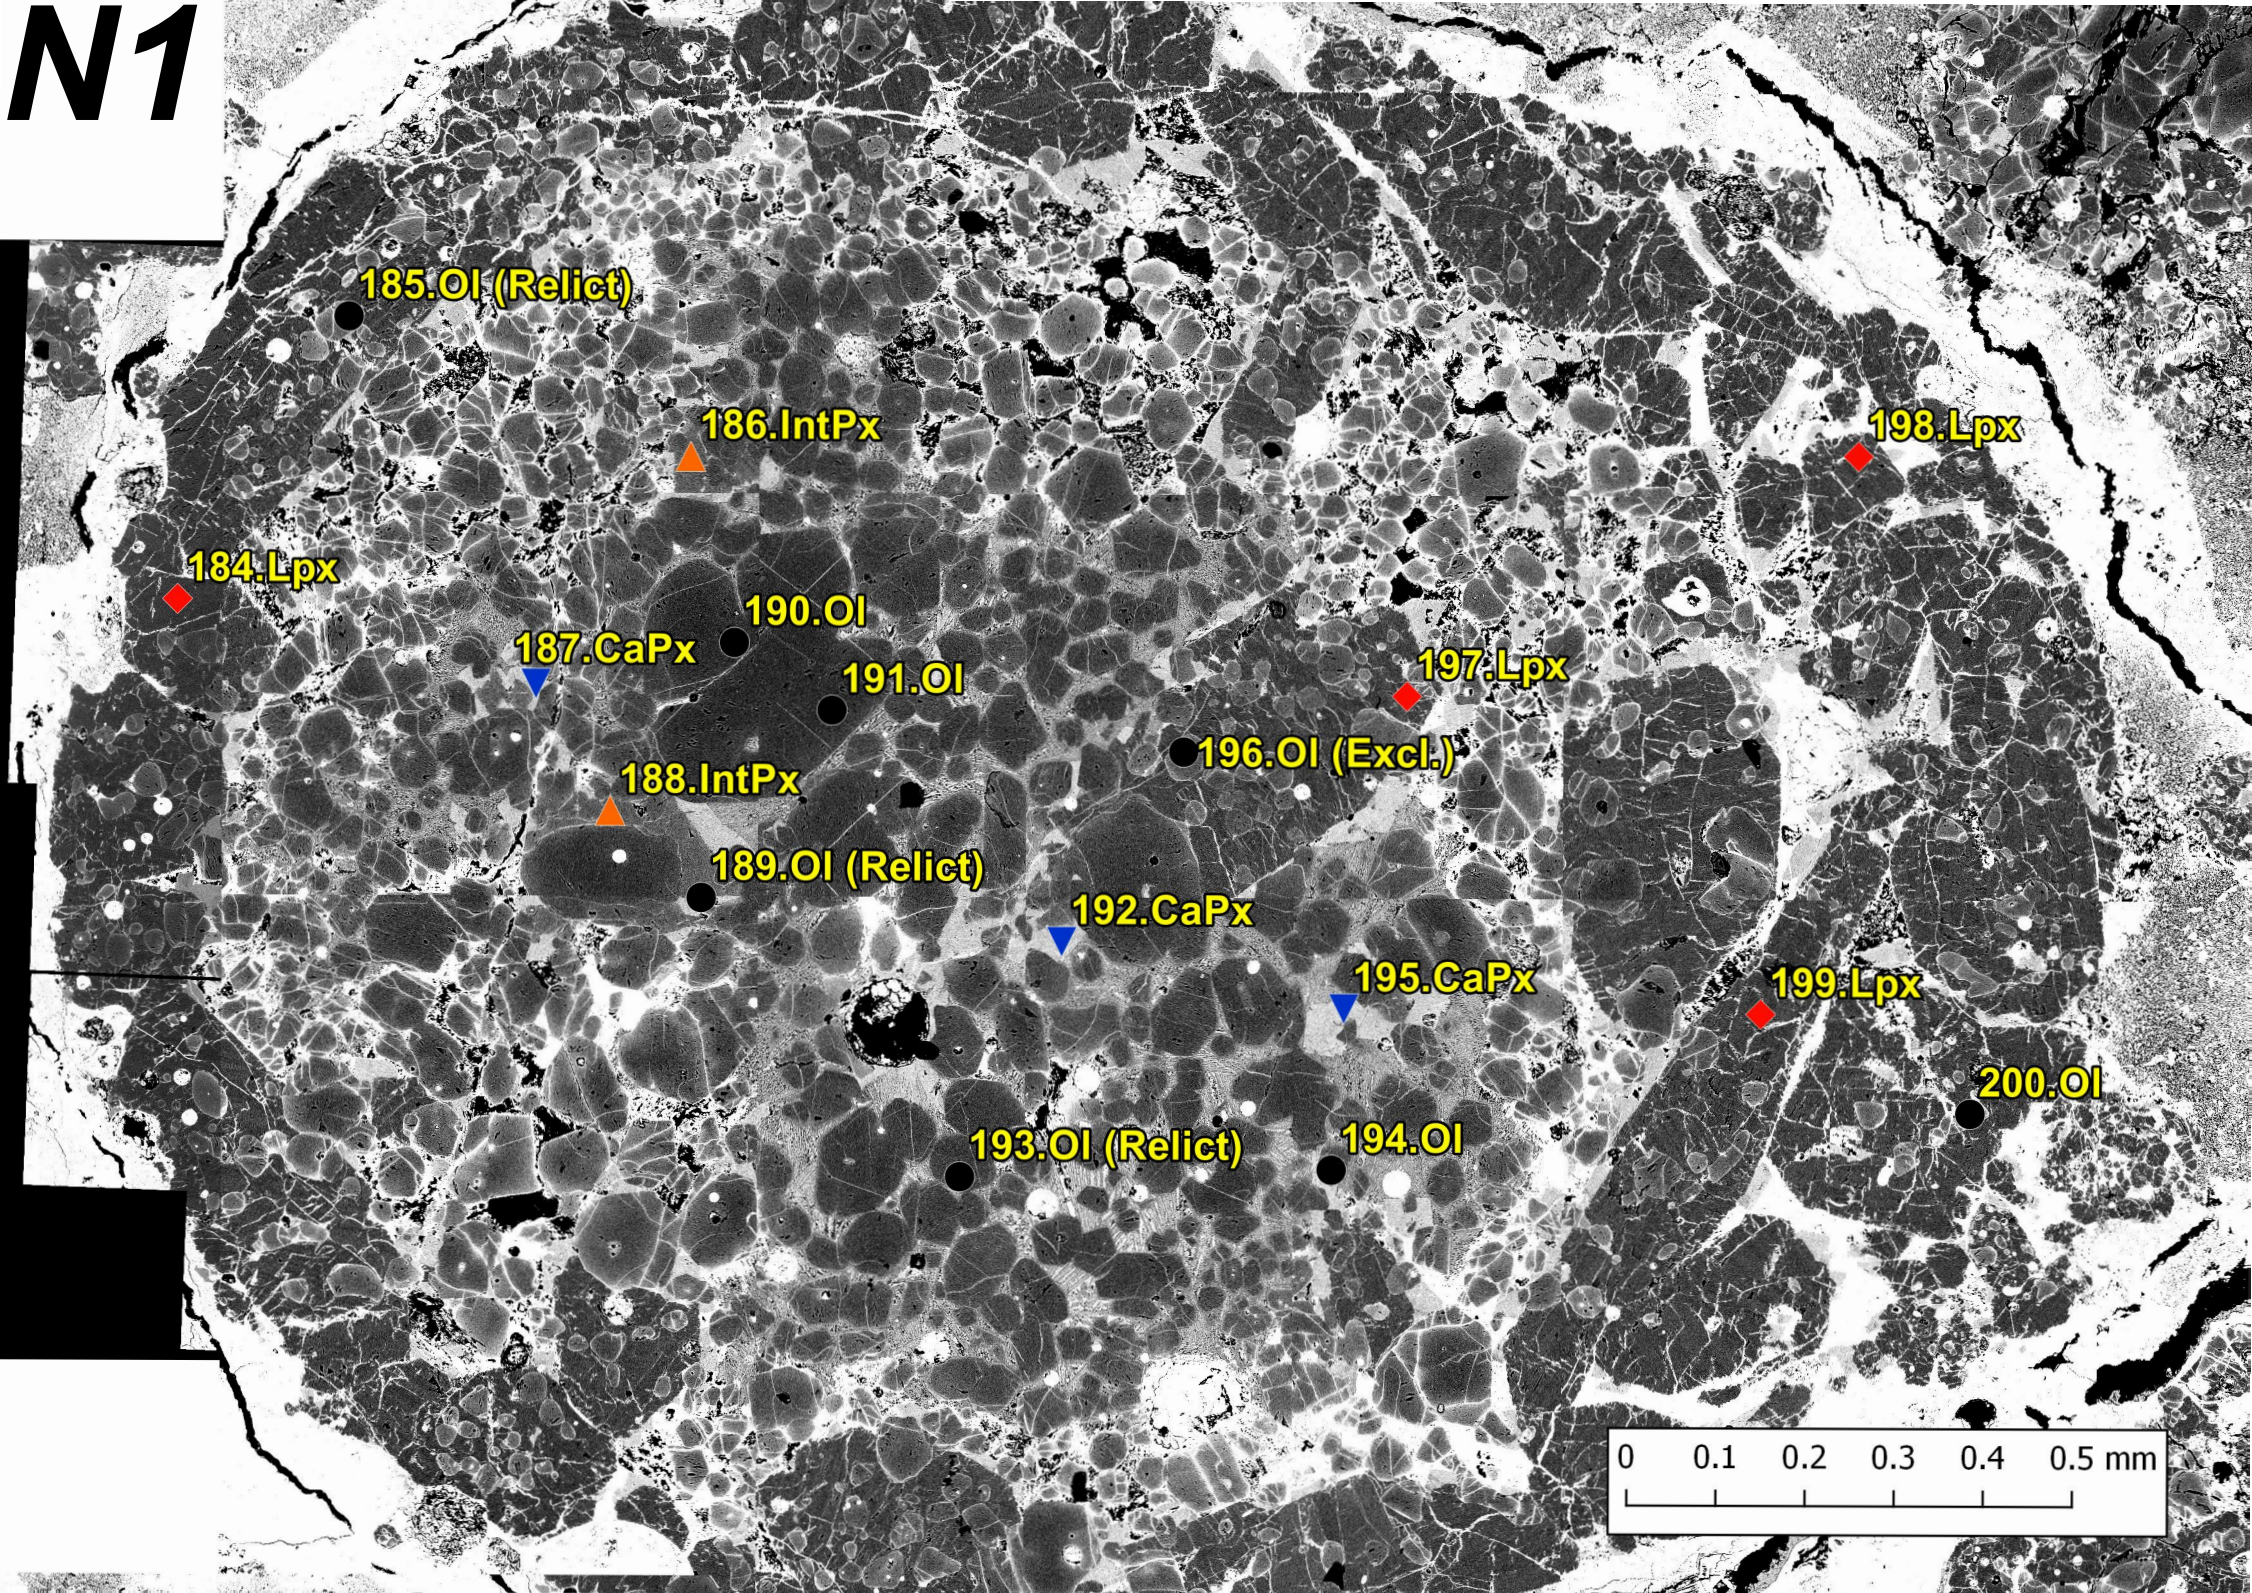

185.OI (Relict)

186.IntPx

198.Lpx

184.Lpx

190.OI

187.CaPx

191.OI

197.Lpx

196.OI (Excl.)

188.IntPx

189.OI (Relict)

192.CaPx

195.CaPx

199.Lpx

200.OI

193.OI (Relict)

194.OI

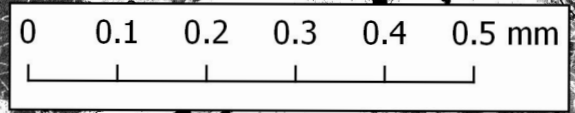

# N2

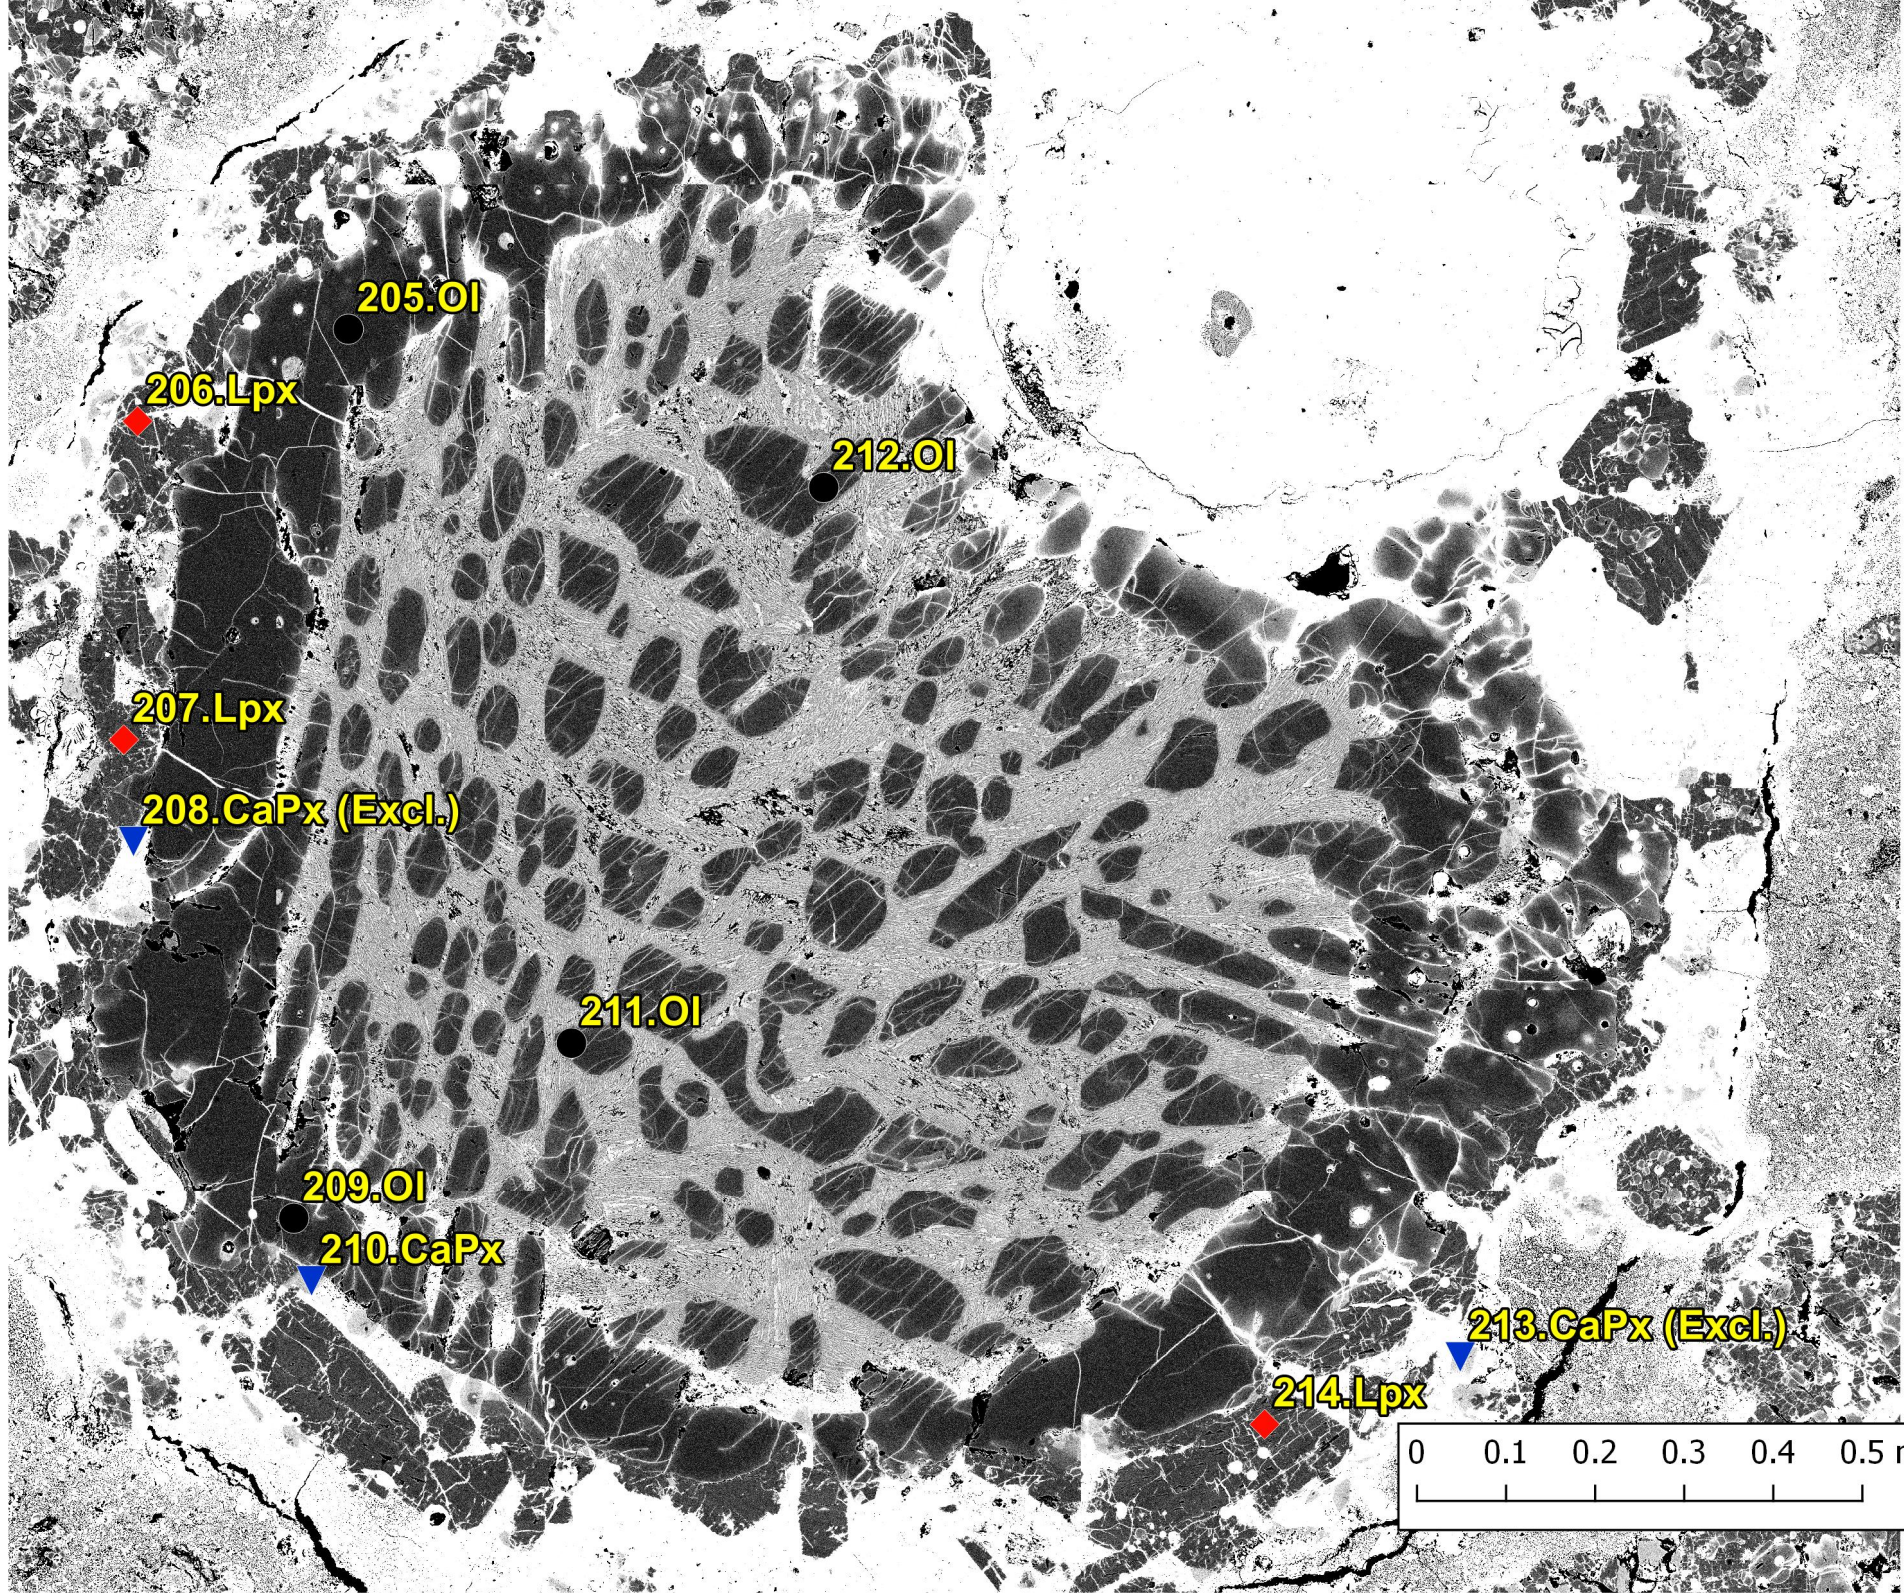

# N3

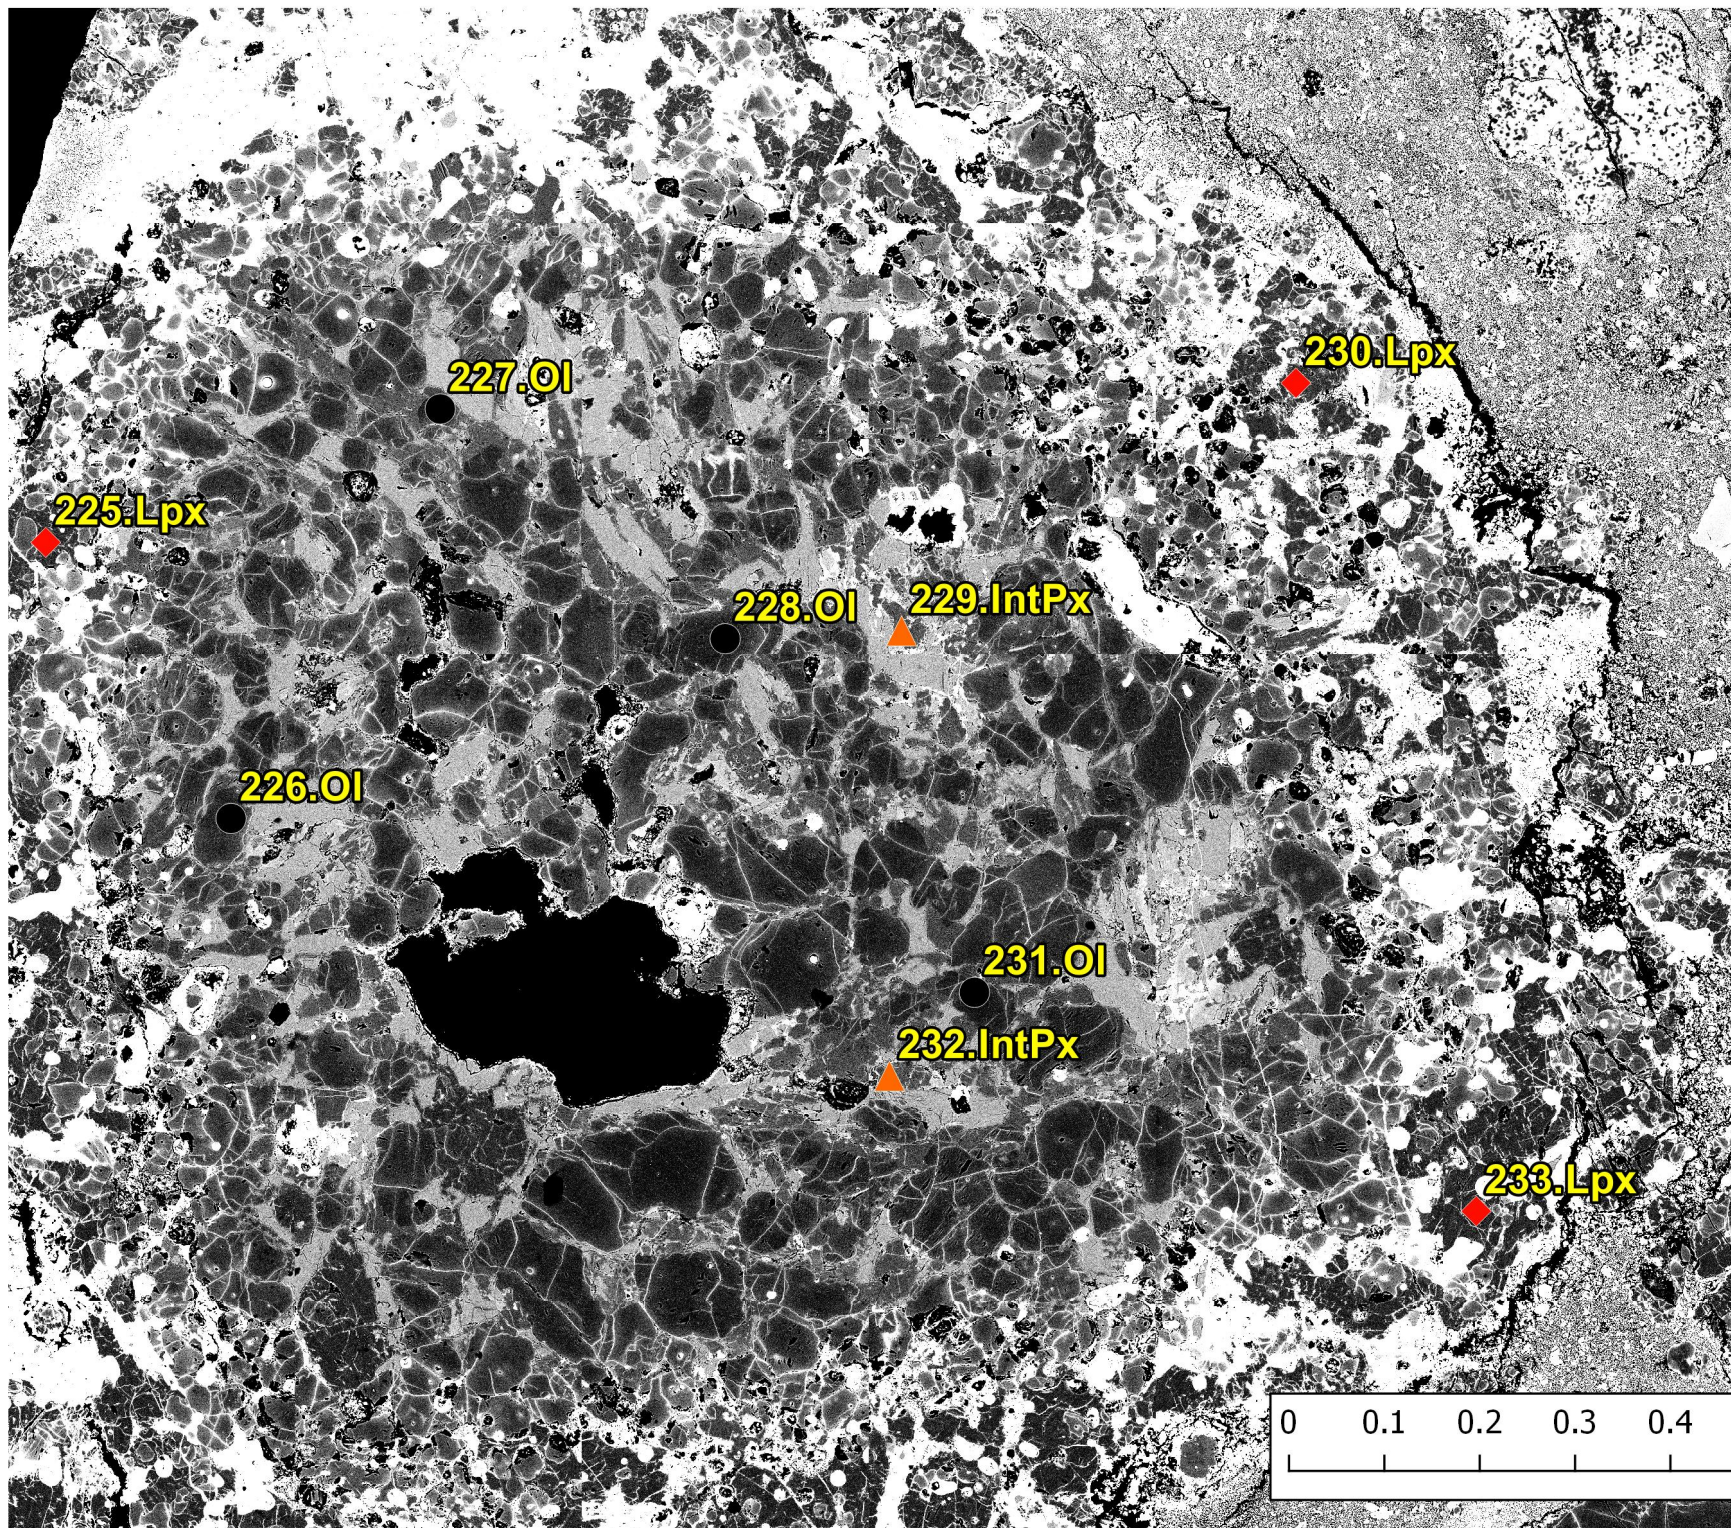

# N4

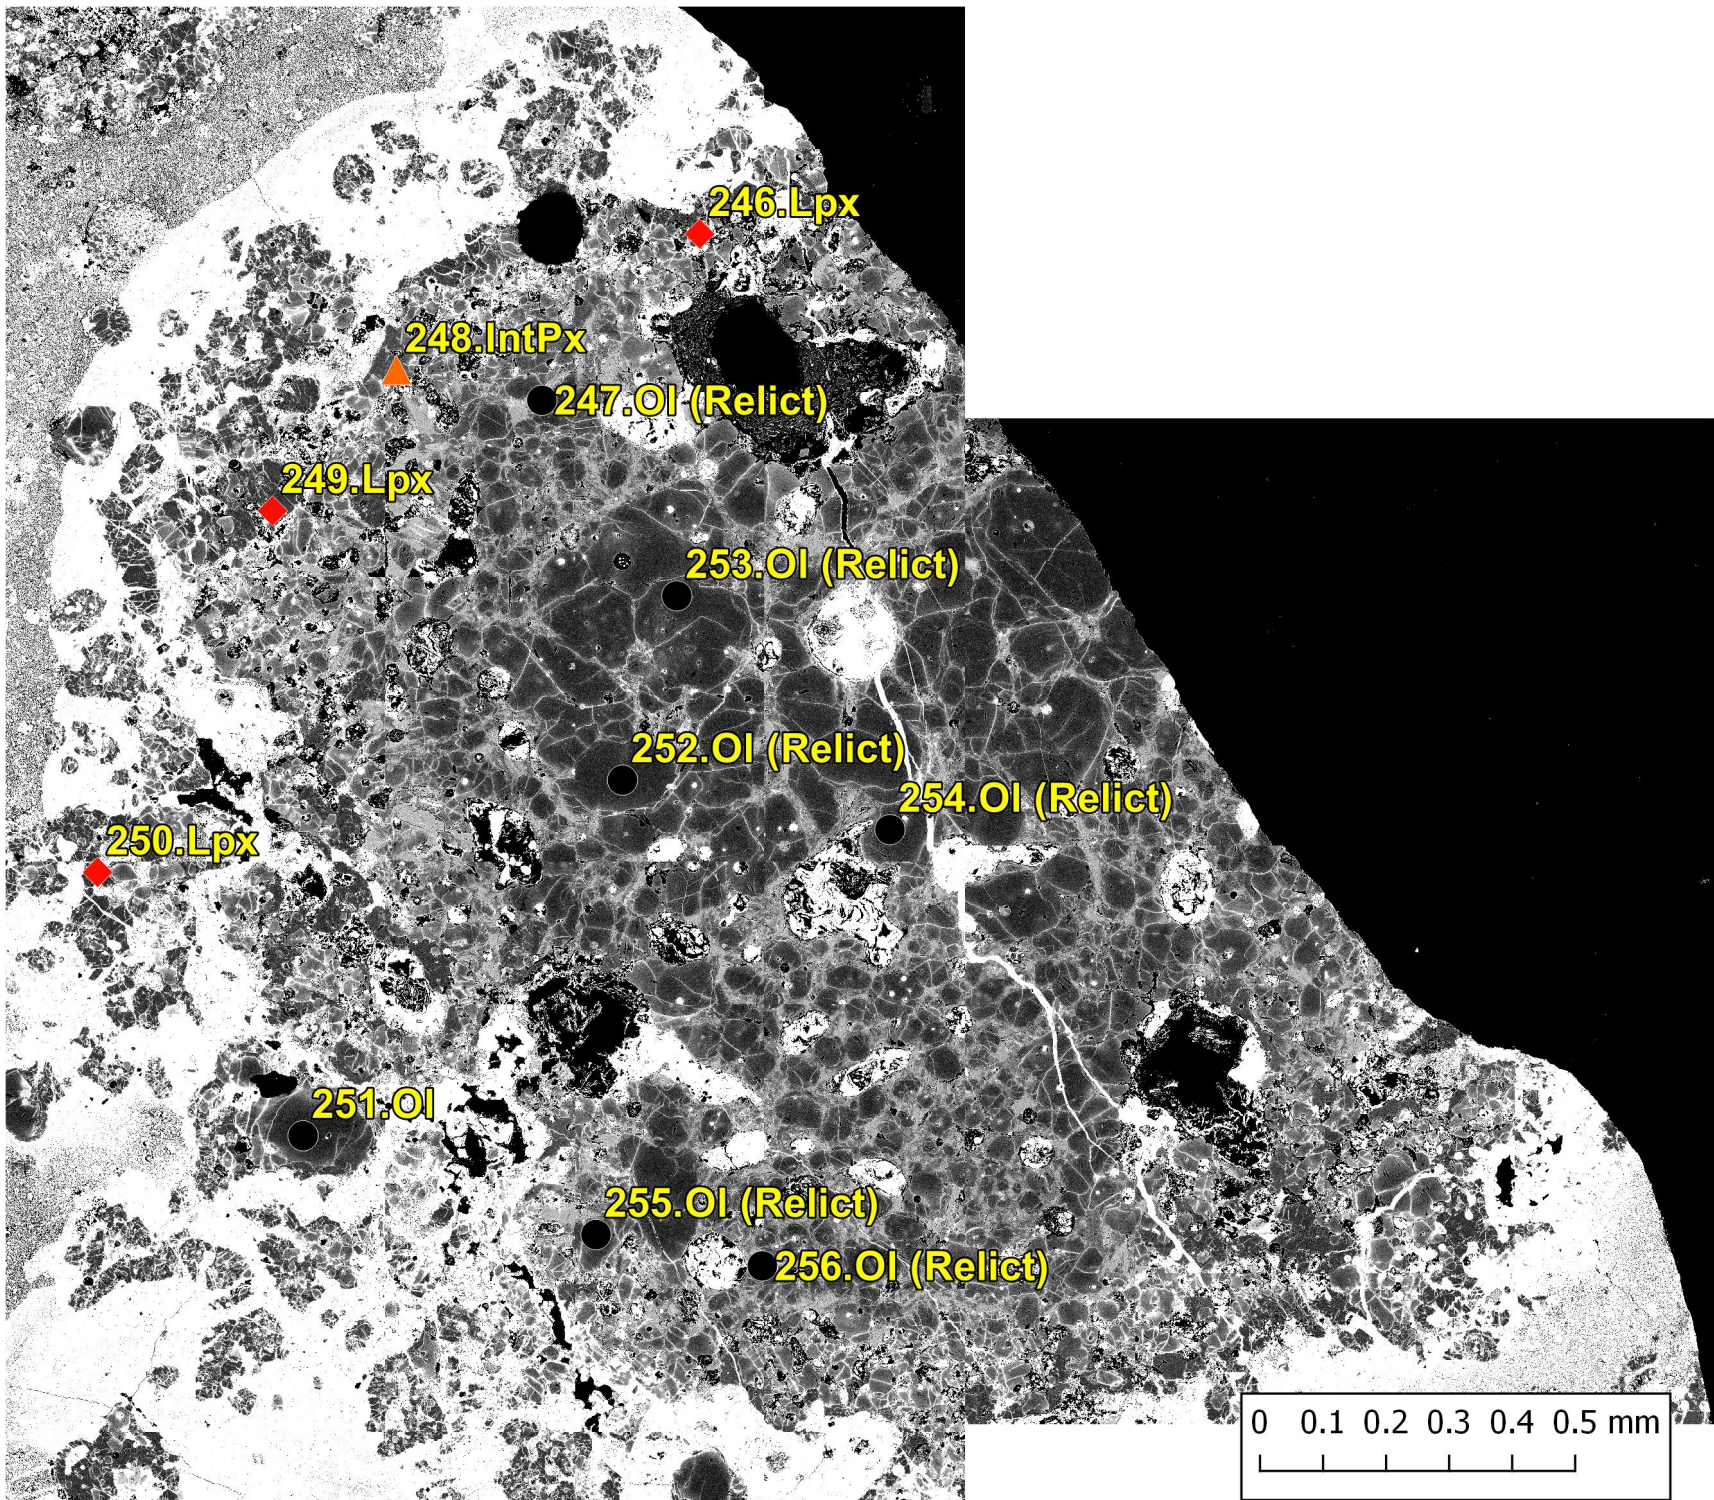

# N5

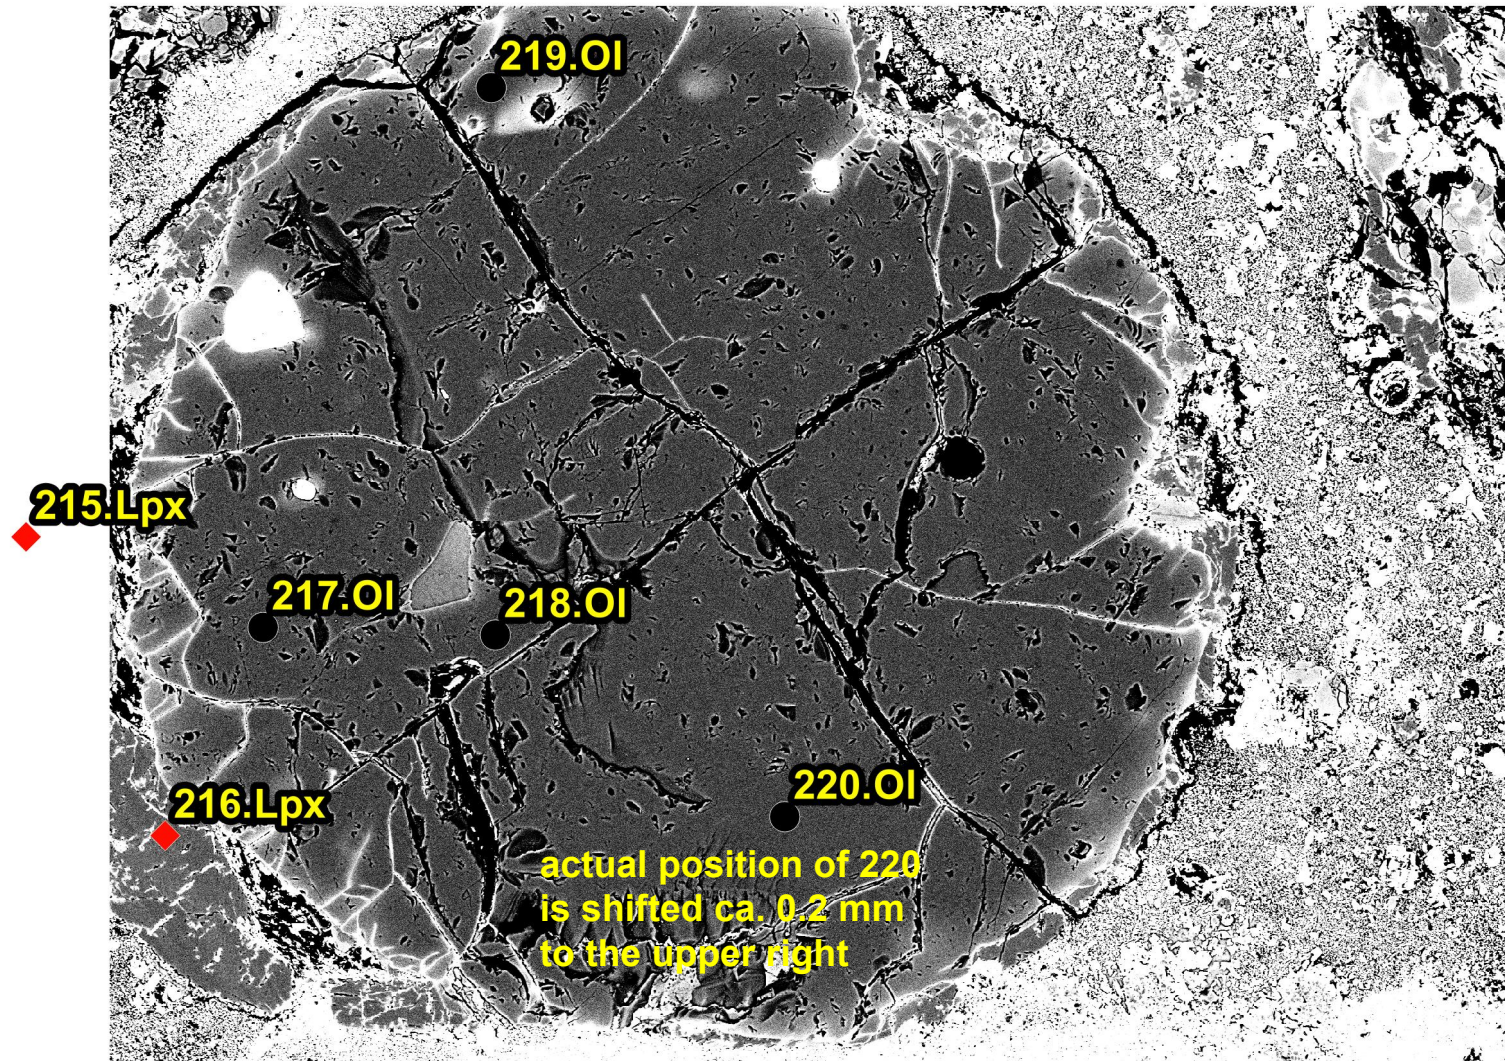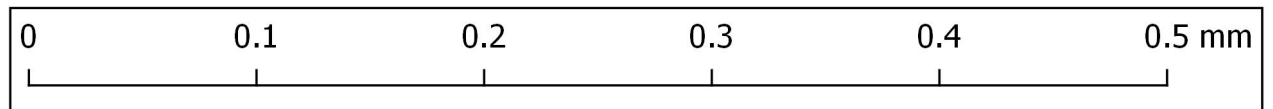

# N6

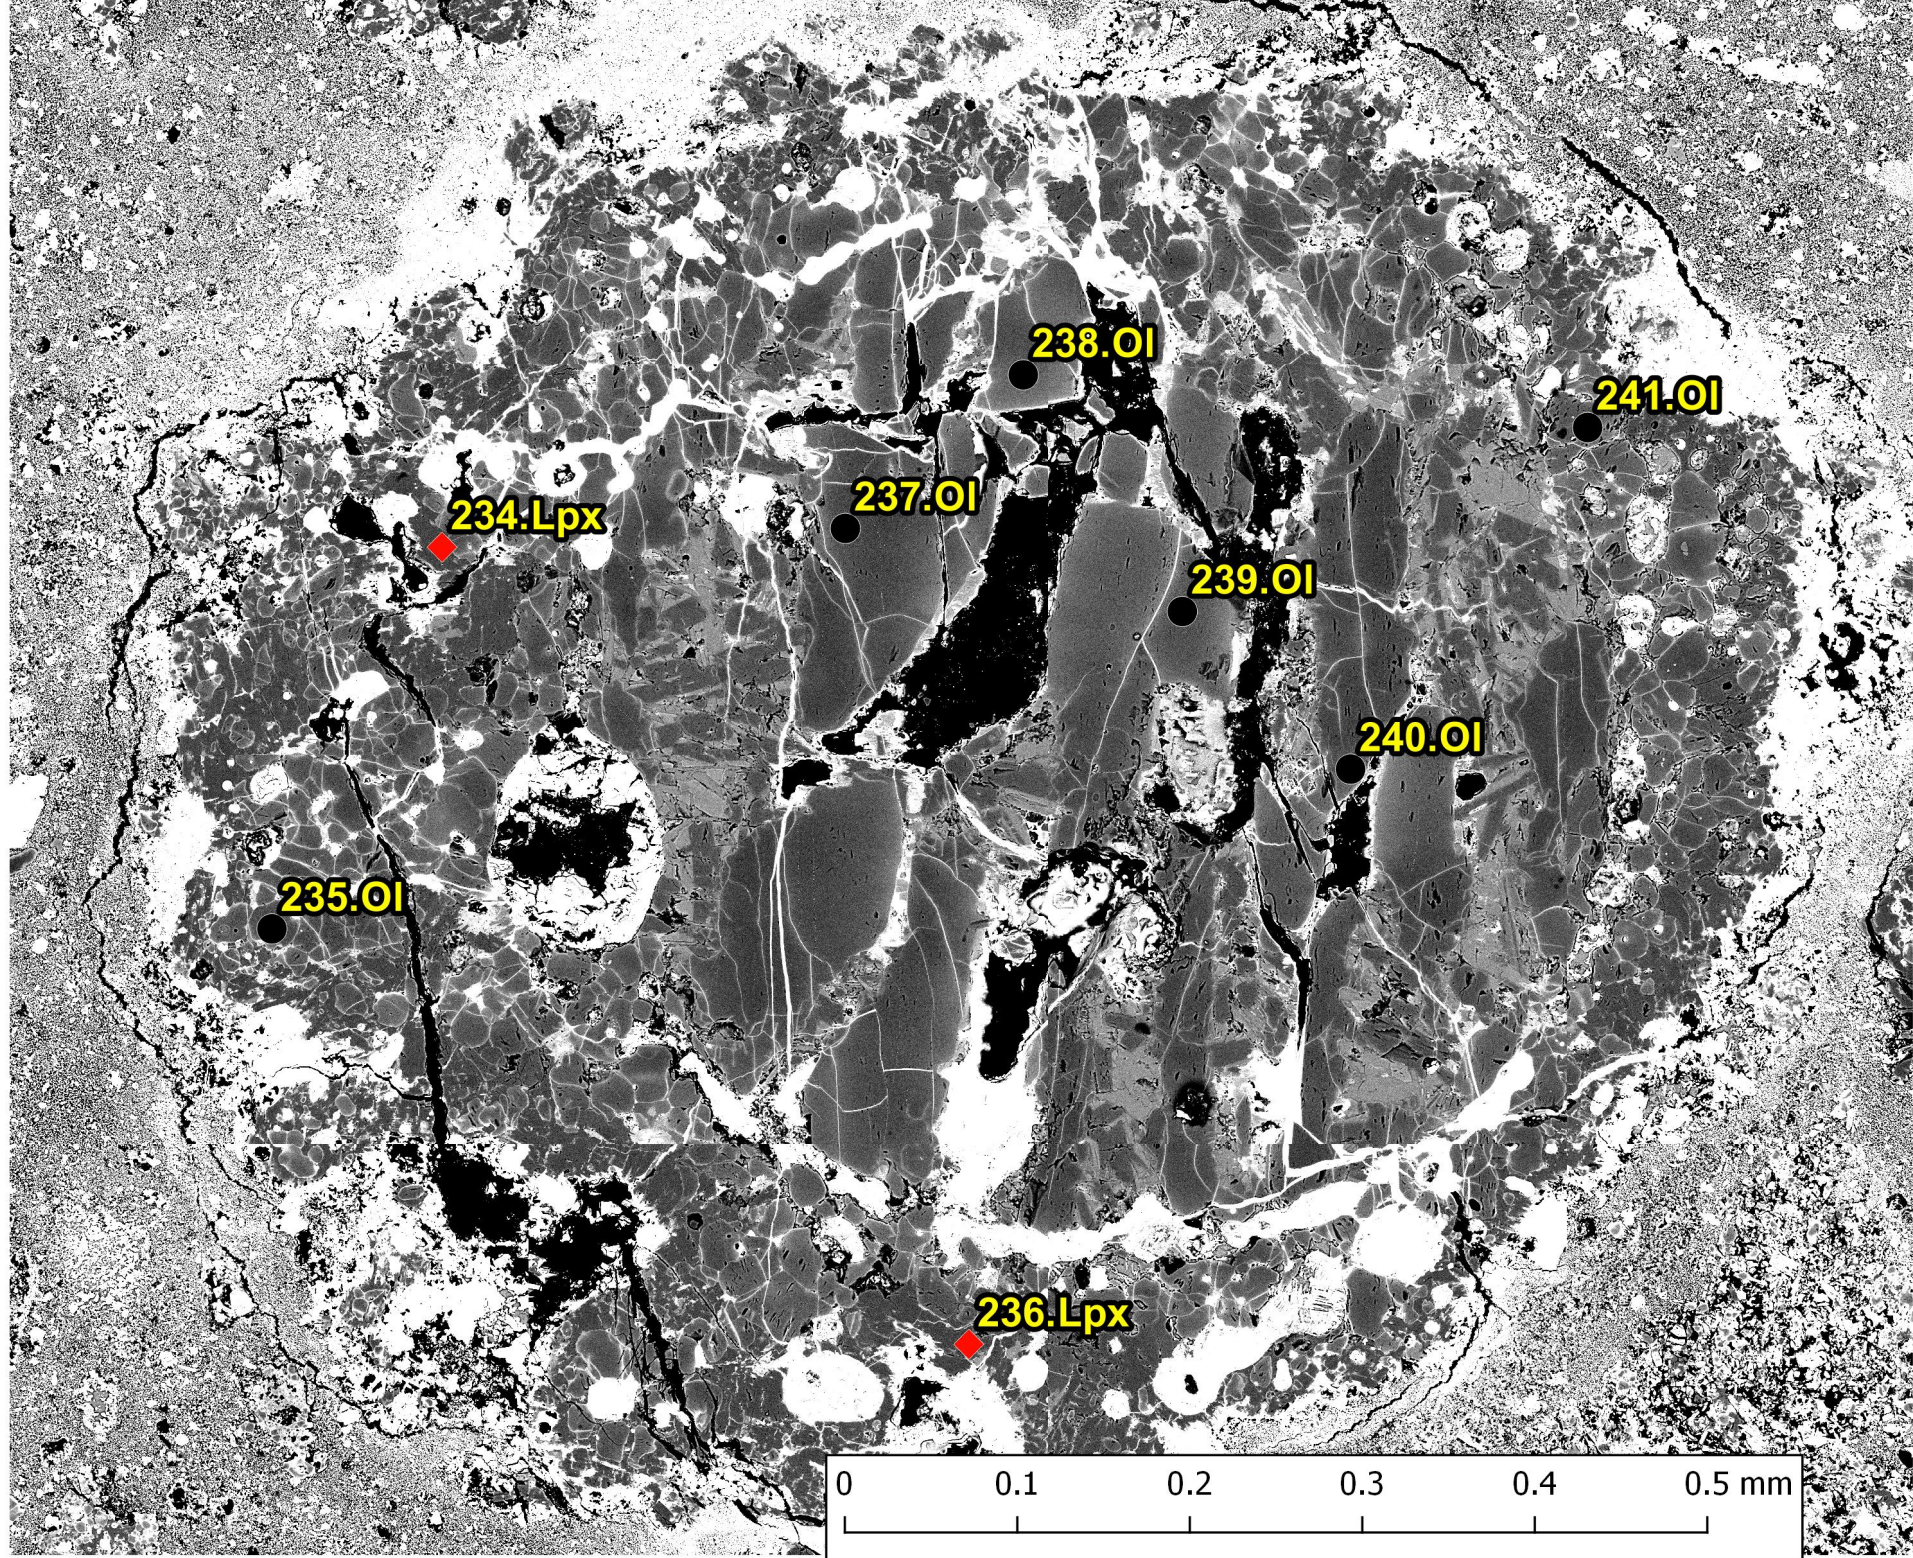



N7

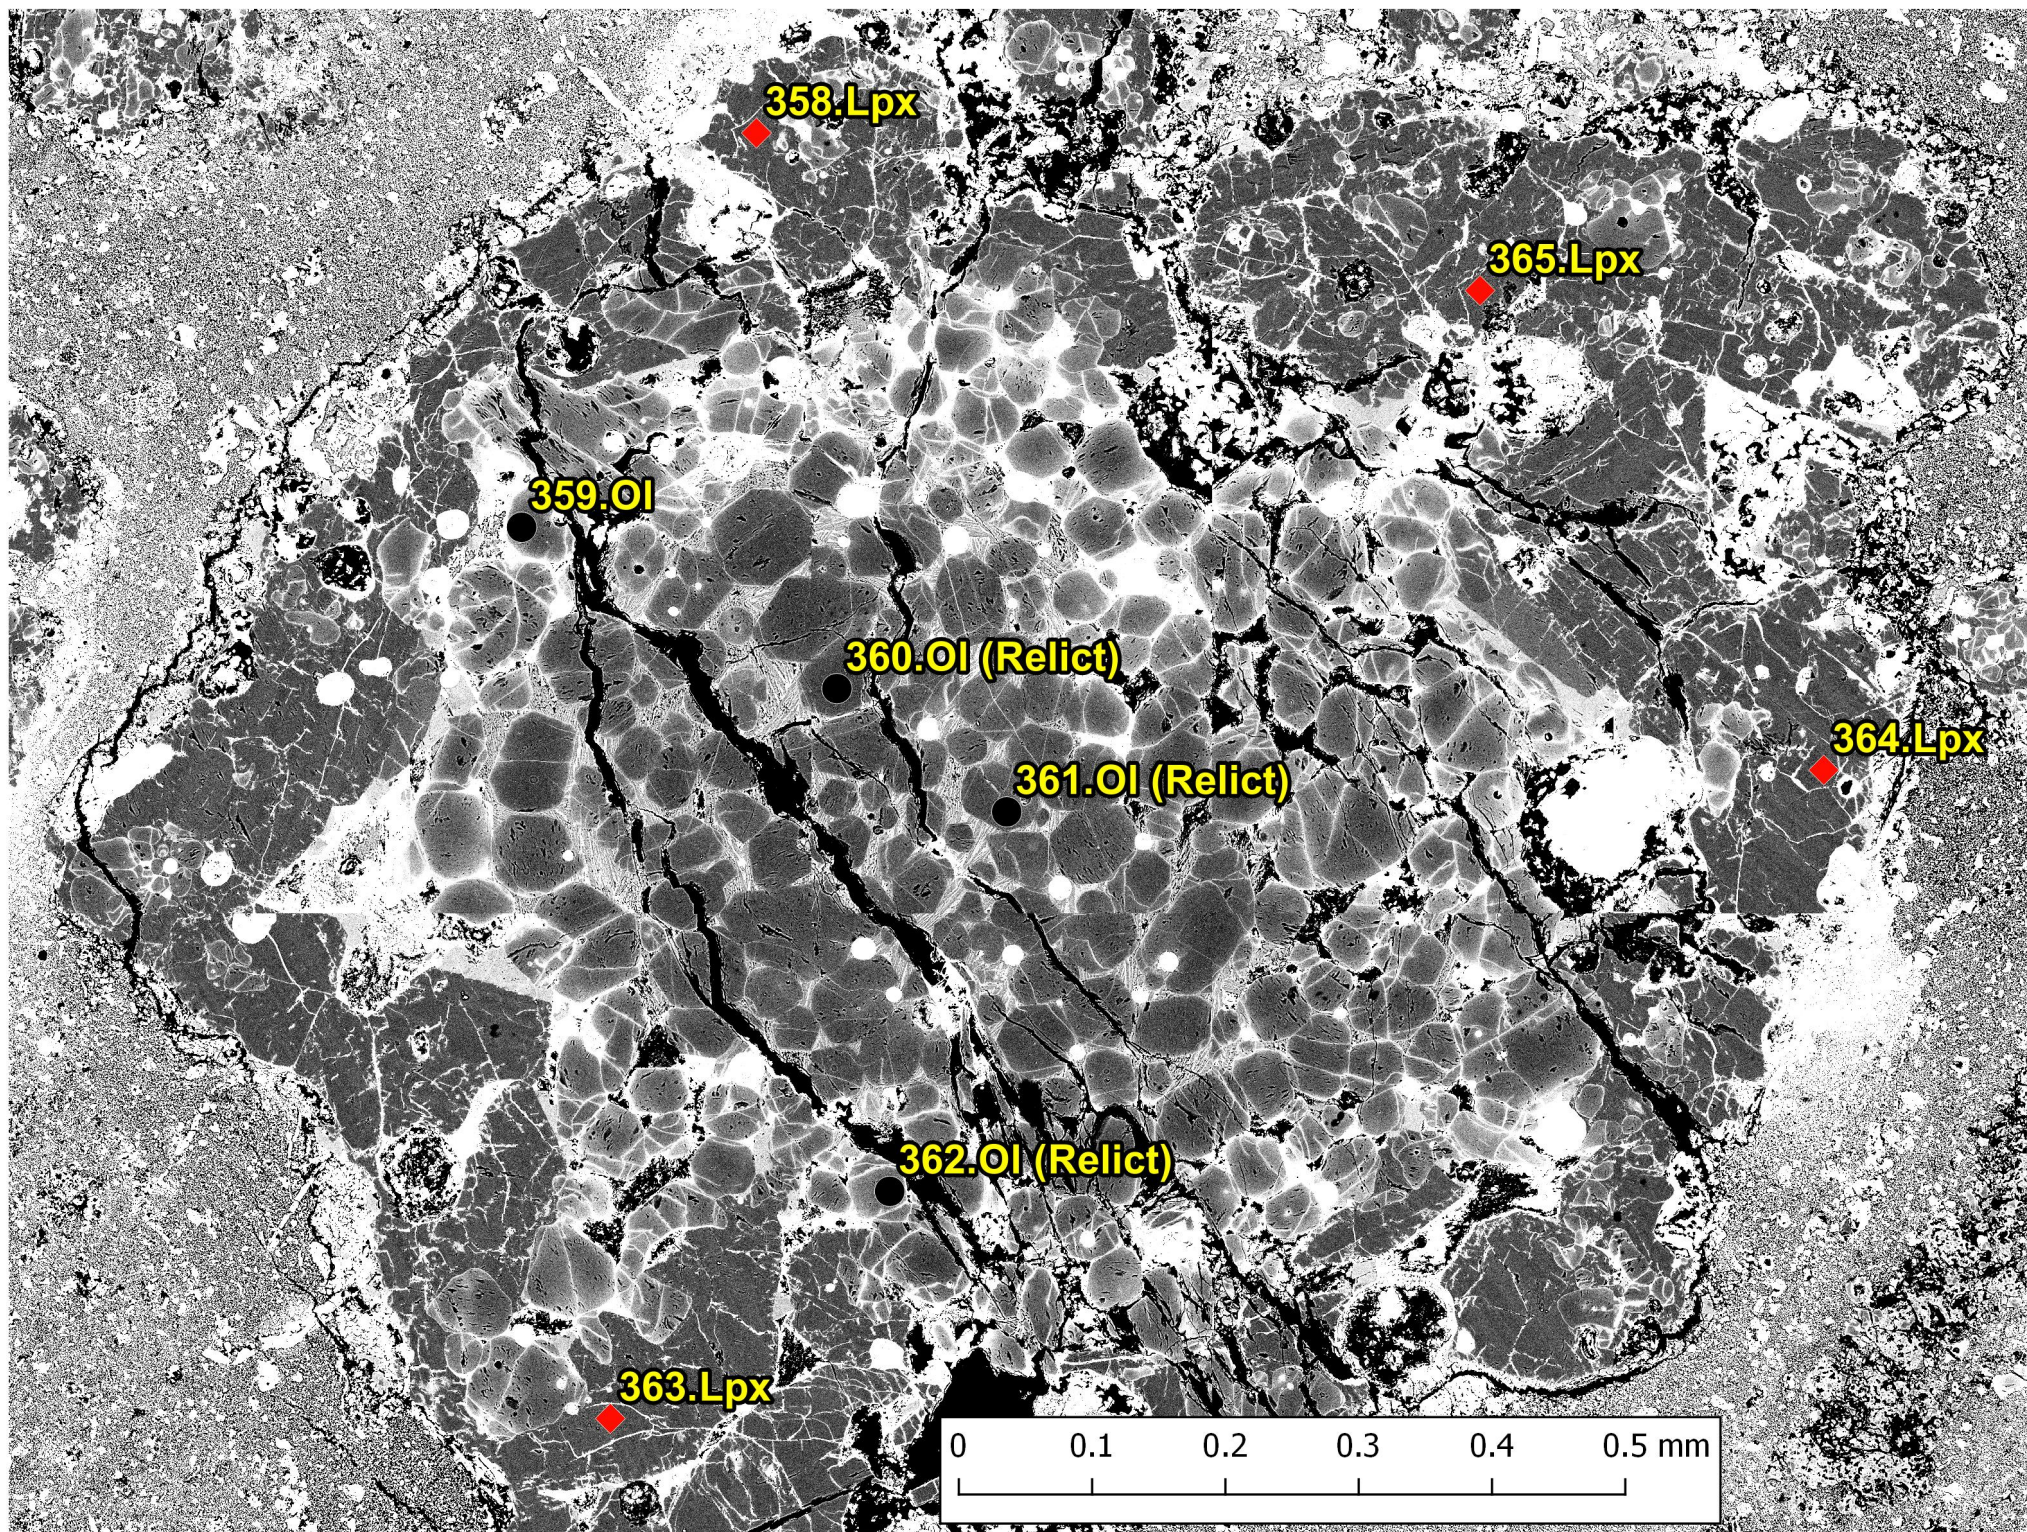

358.Lpx

365.Lpx

359.OI

360.OI (Relict)

361.OI (Relict)

364.Lpx

362.OI (Relict)

363.Lpx

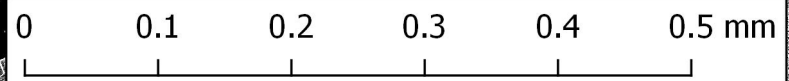

# N8

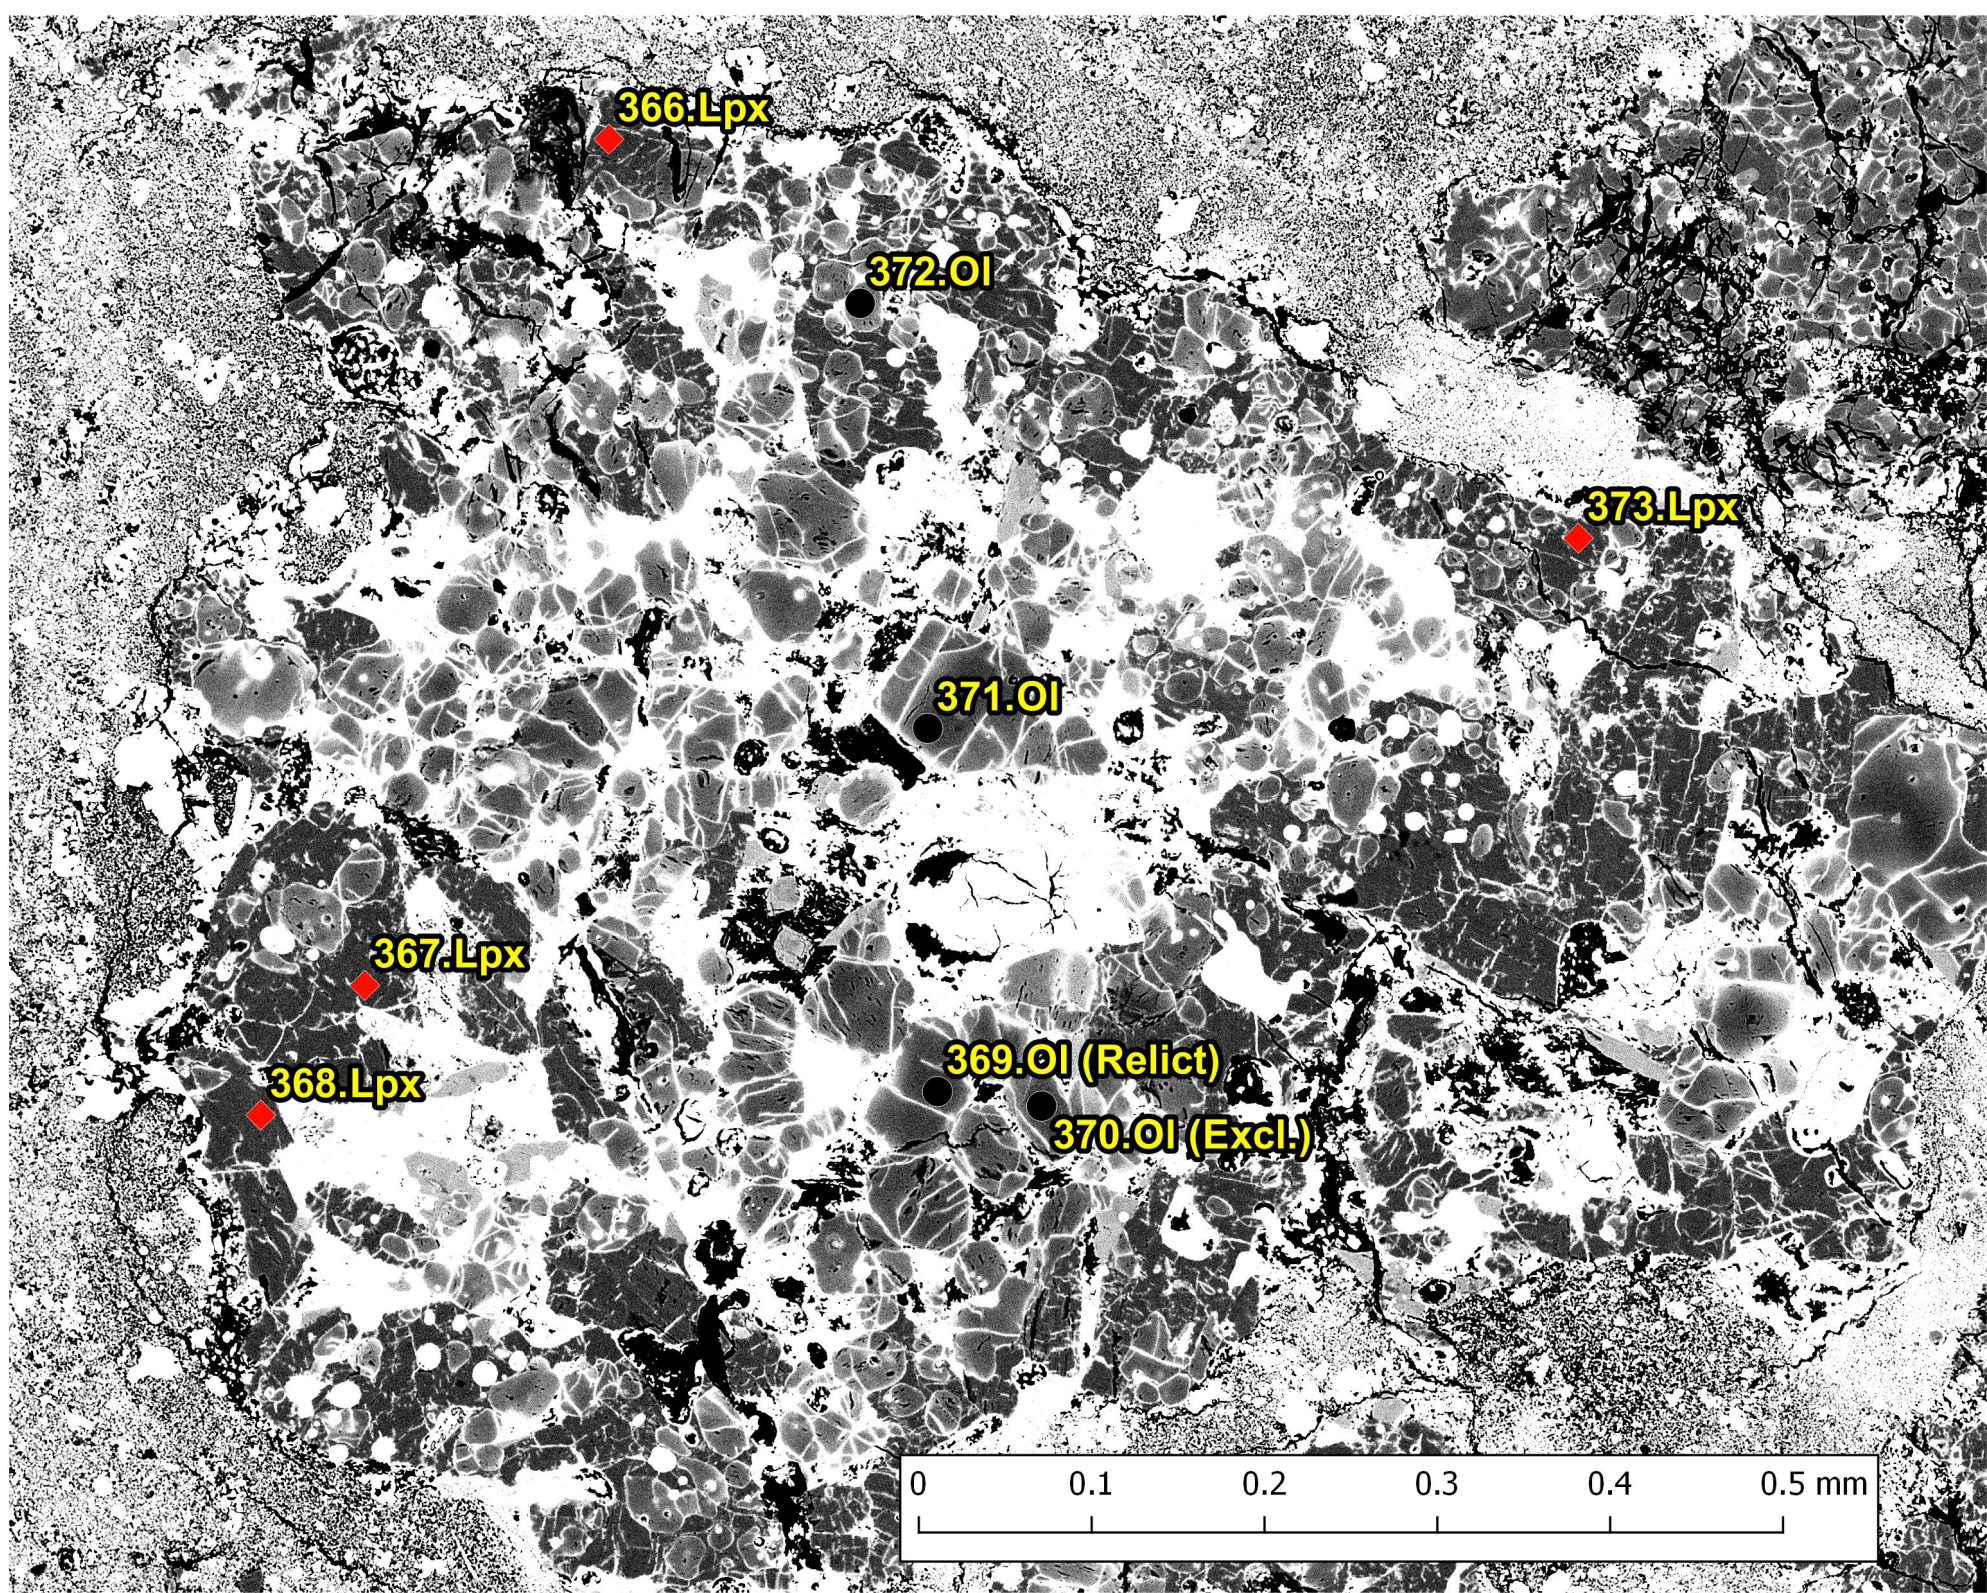

366.Lpx

372.Ol

373.Lpx

371.Ol

367.Lpx

369.Ol (Relict)

368.Lpx

370.Ol (Excl.)

0 0.1 0.2 0.3 0.4 0.5 mm

# N9

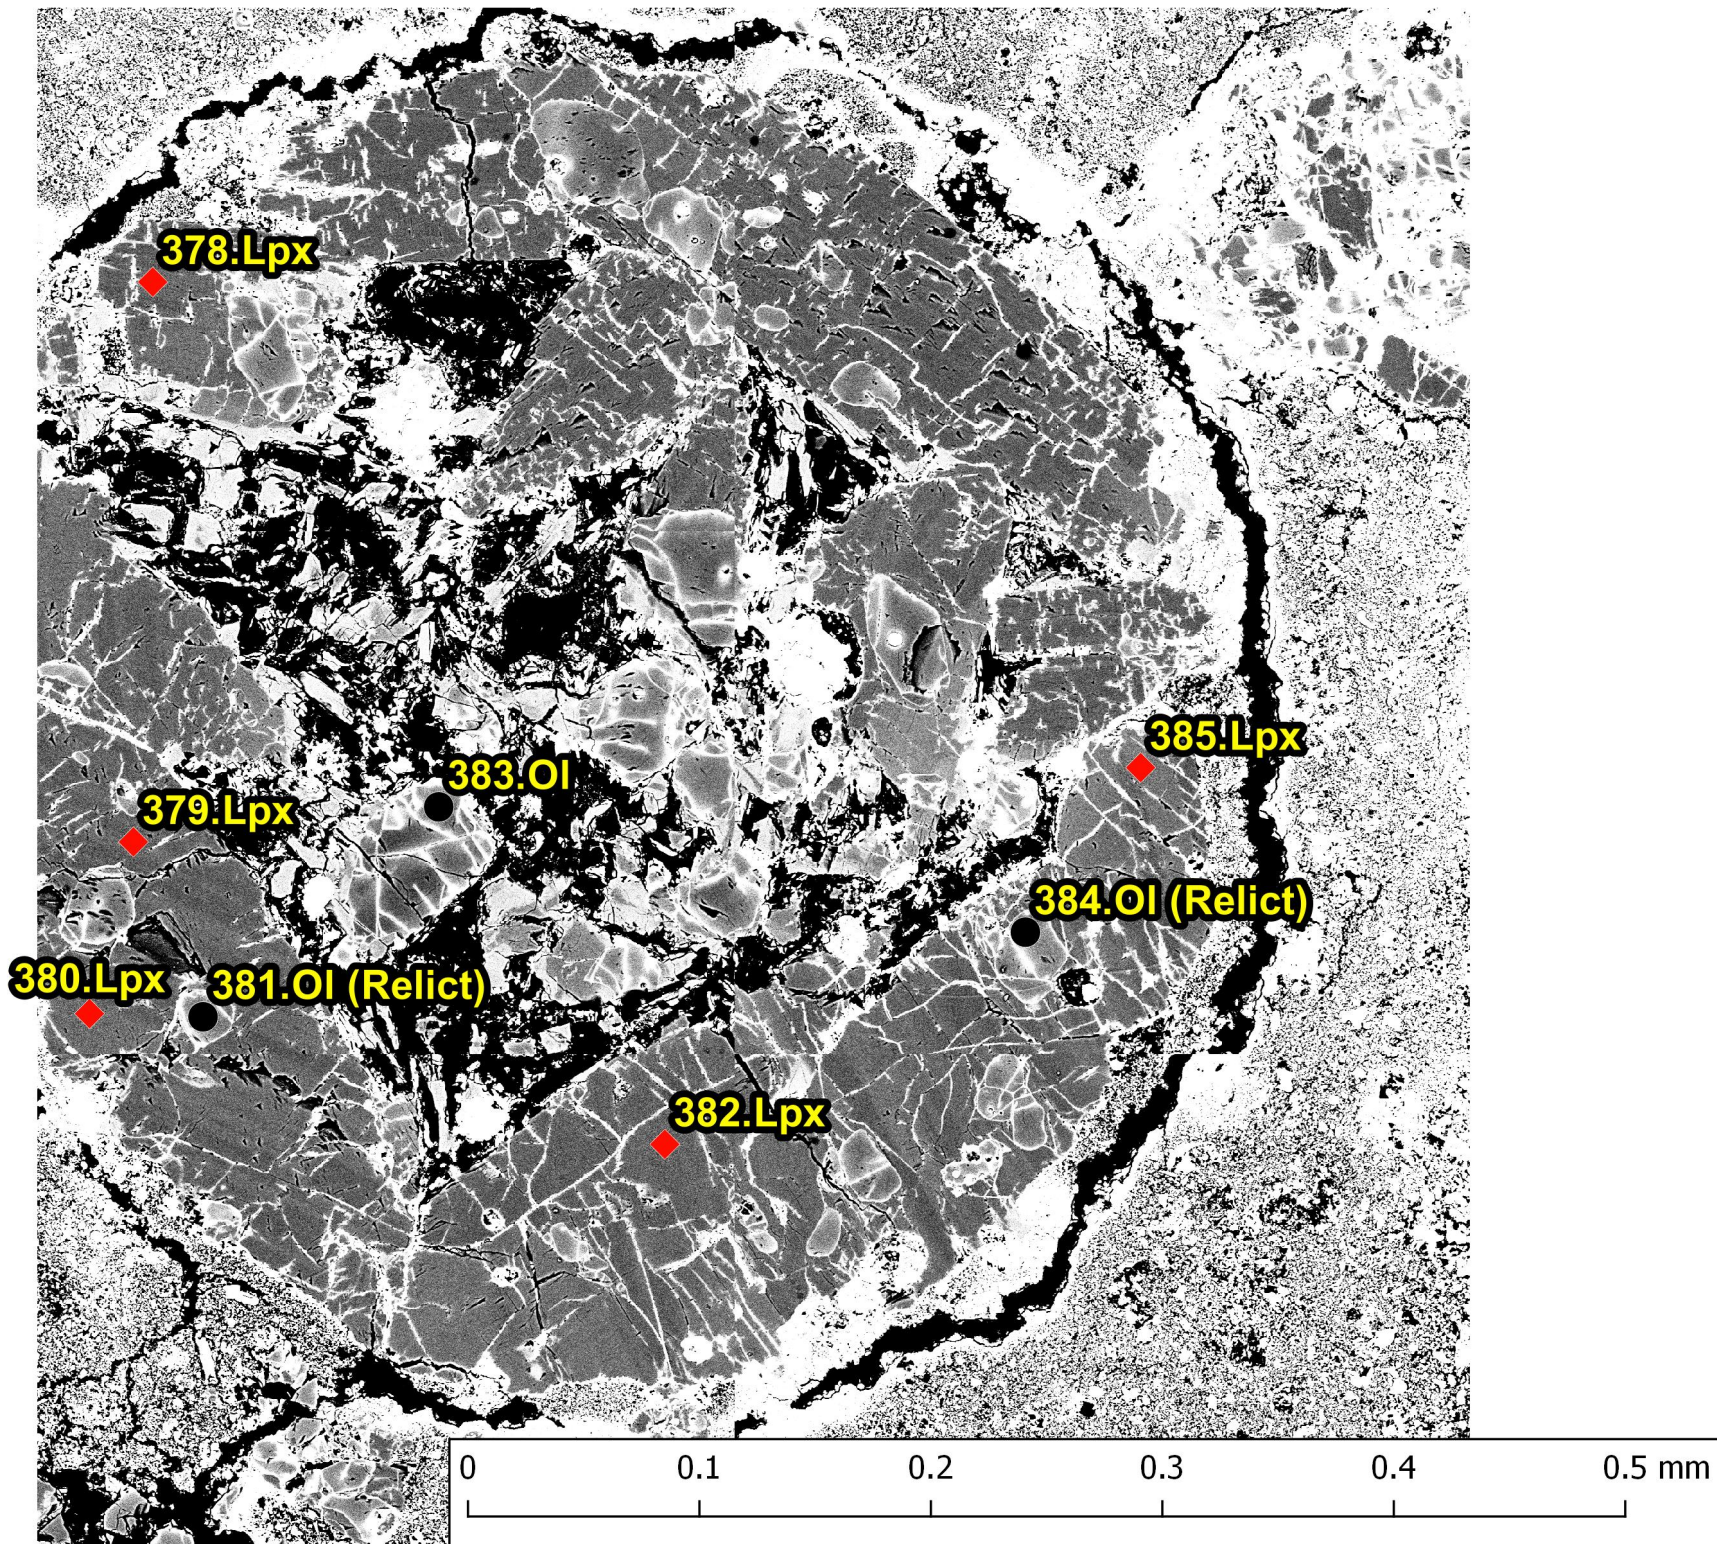

# N10

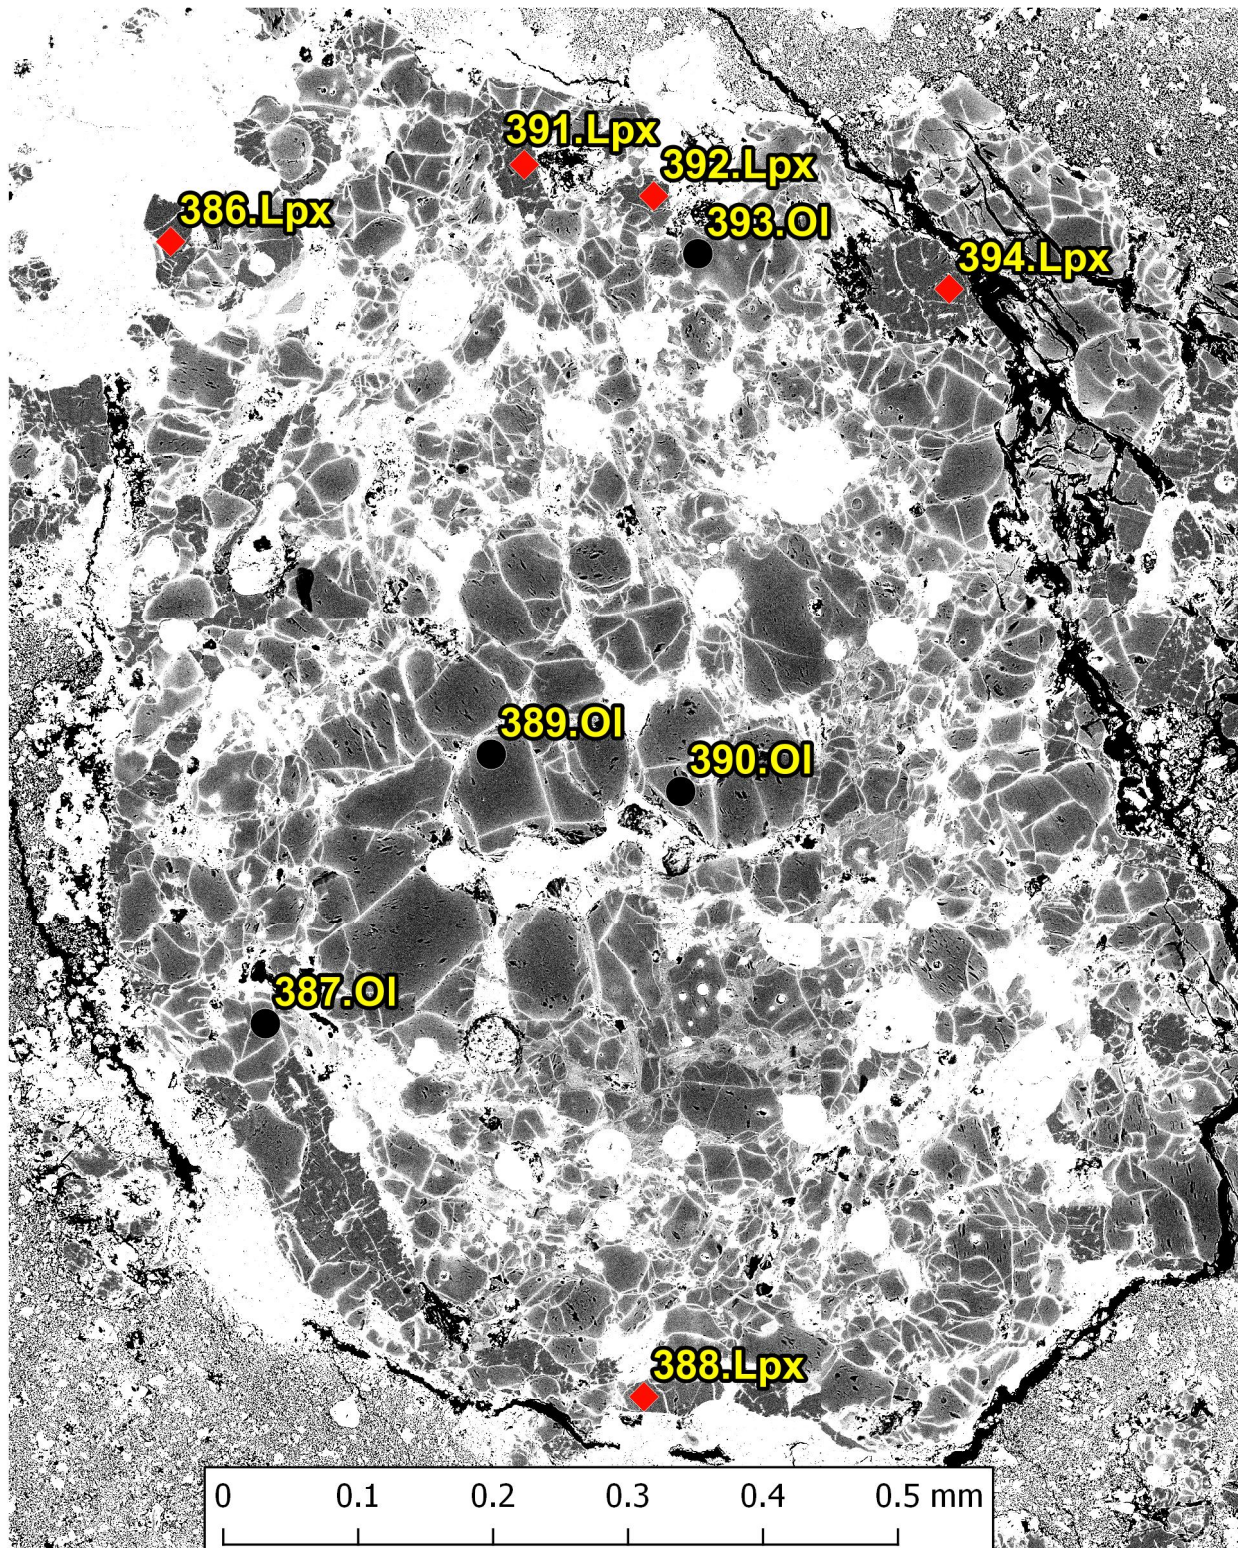

**N11**

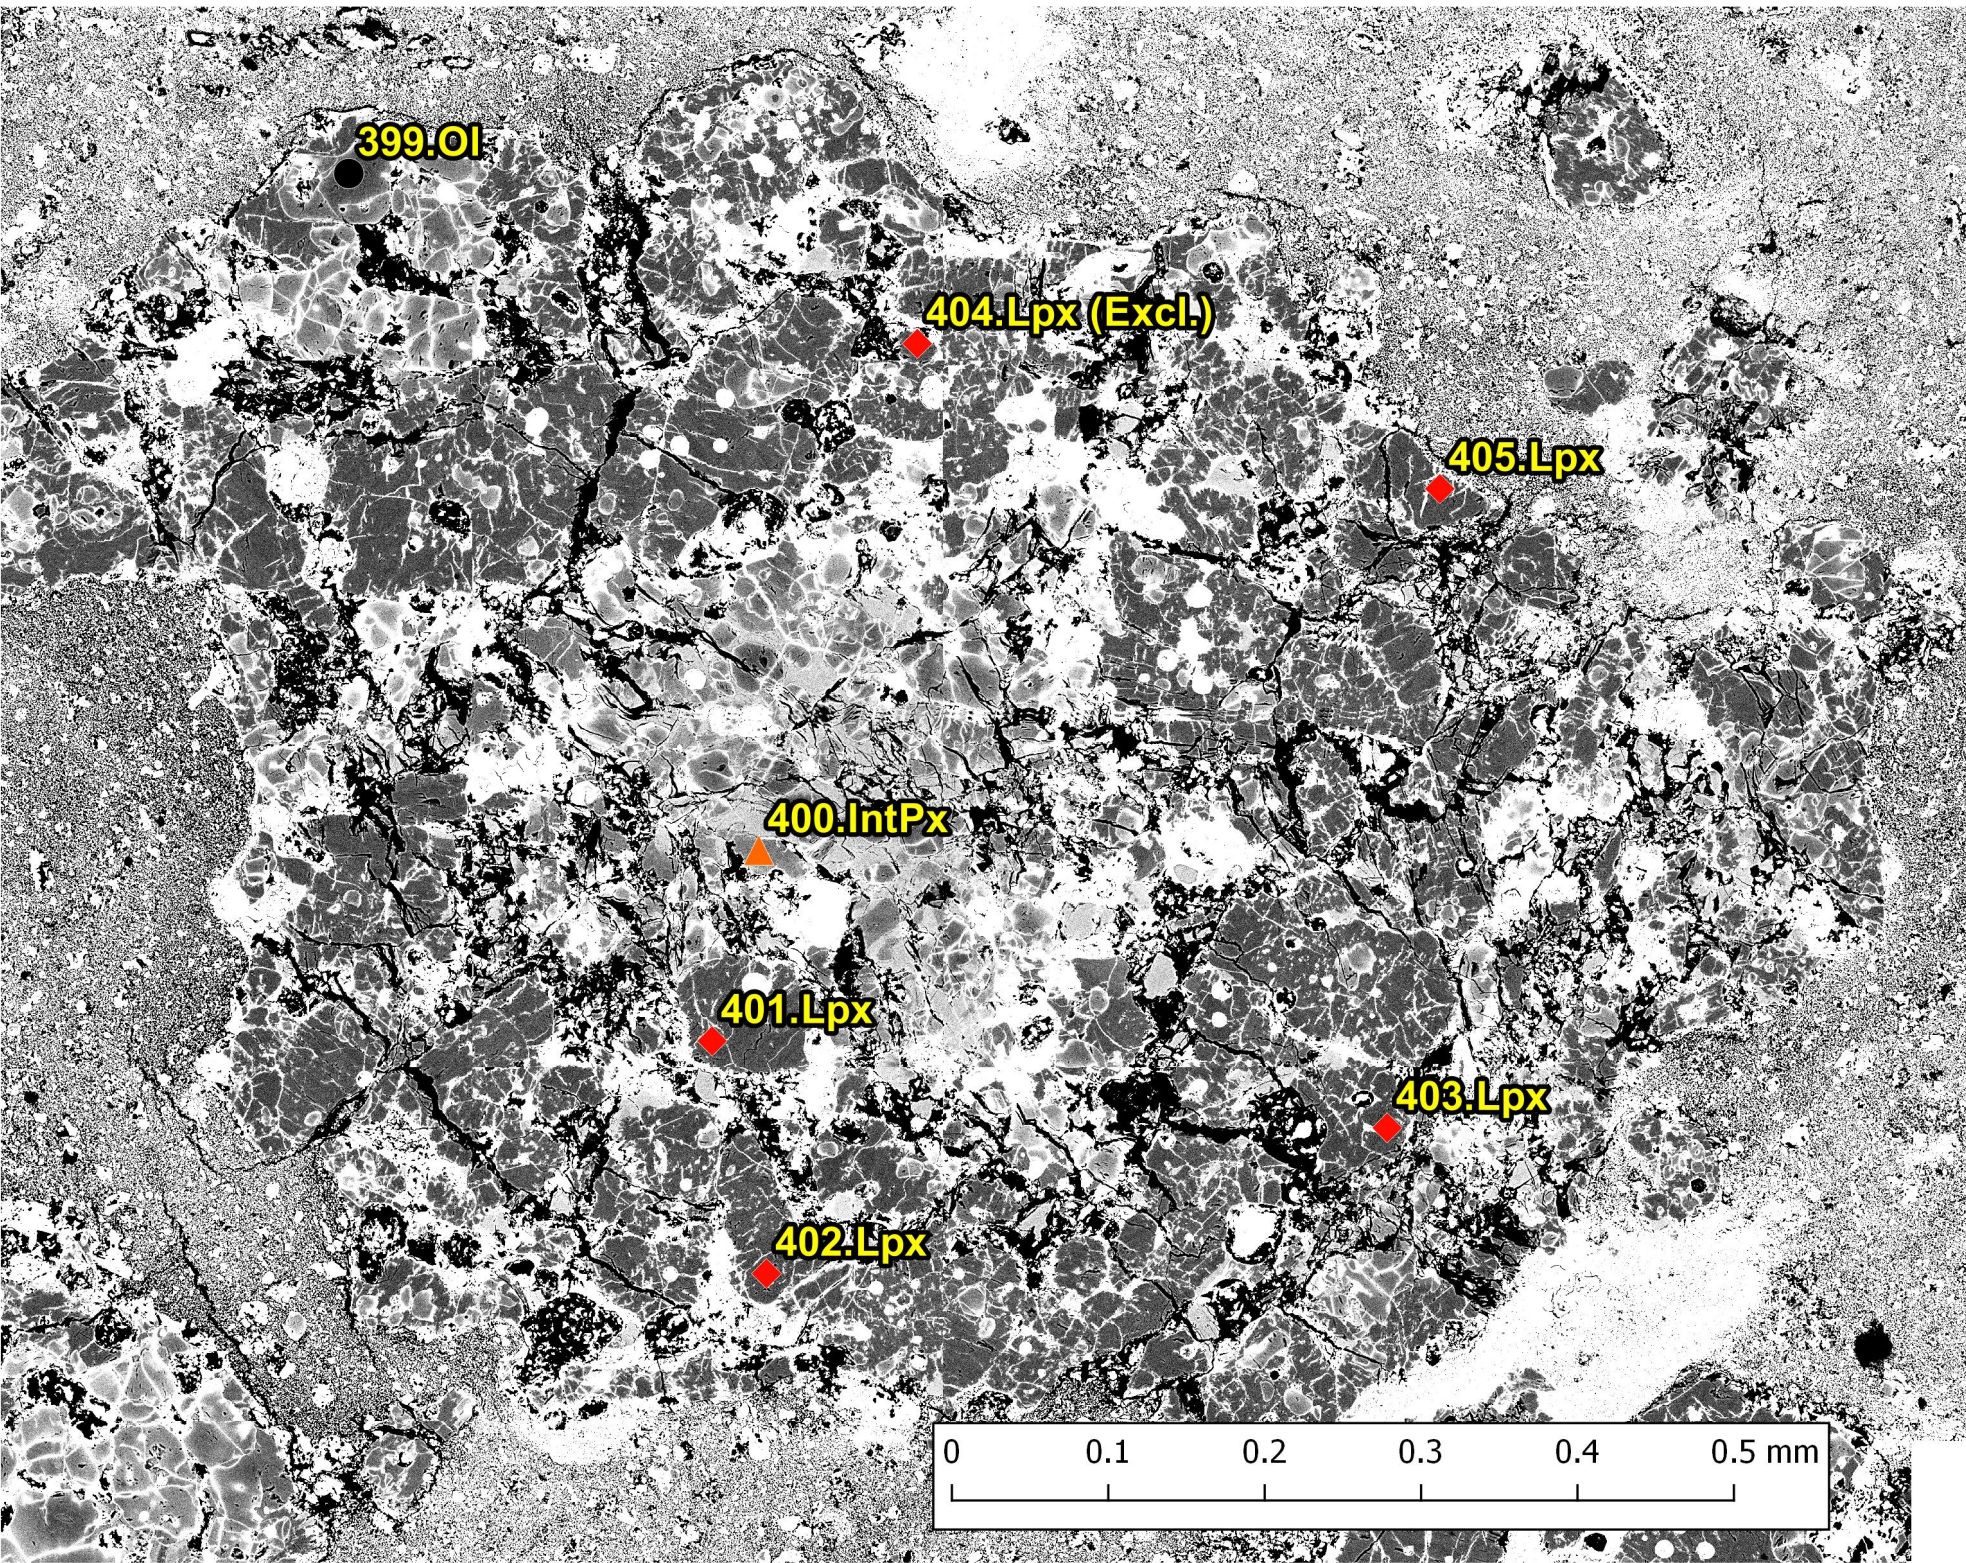

# N12

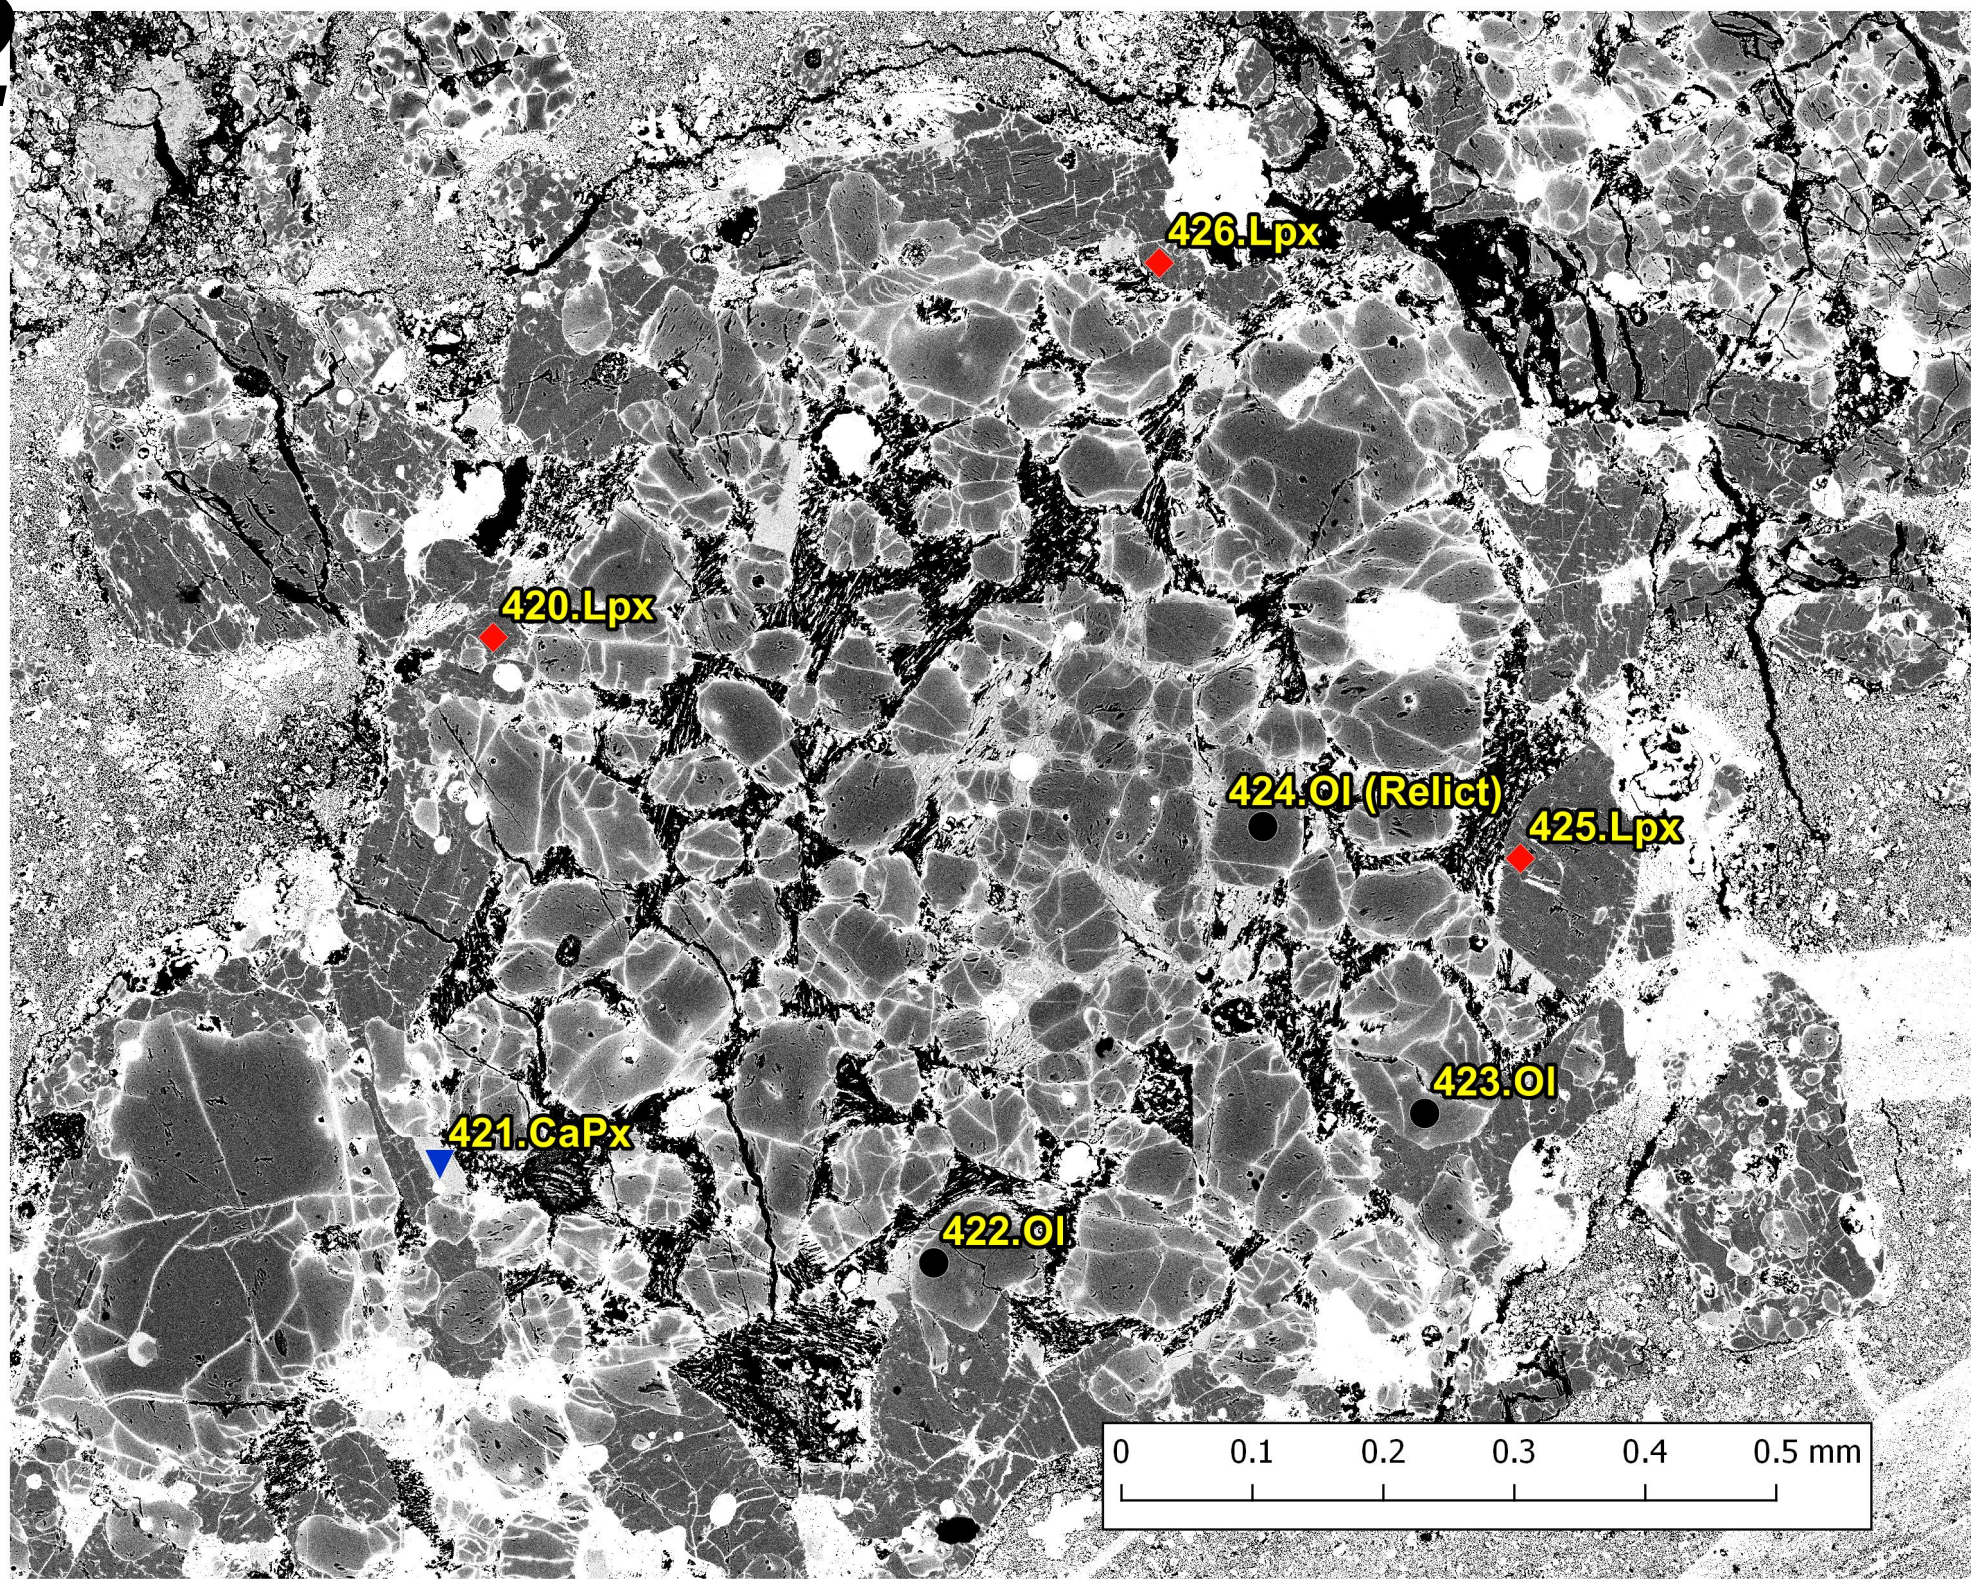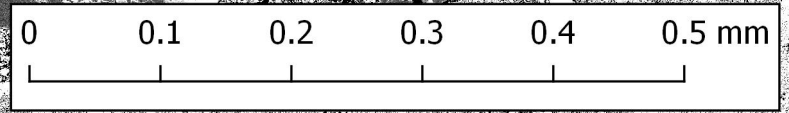

# N13

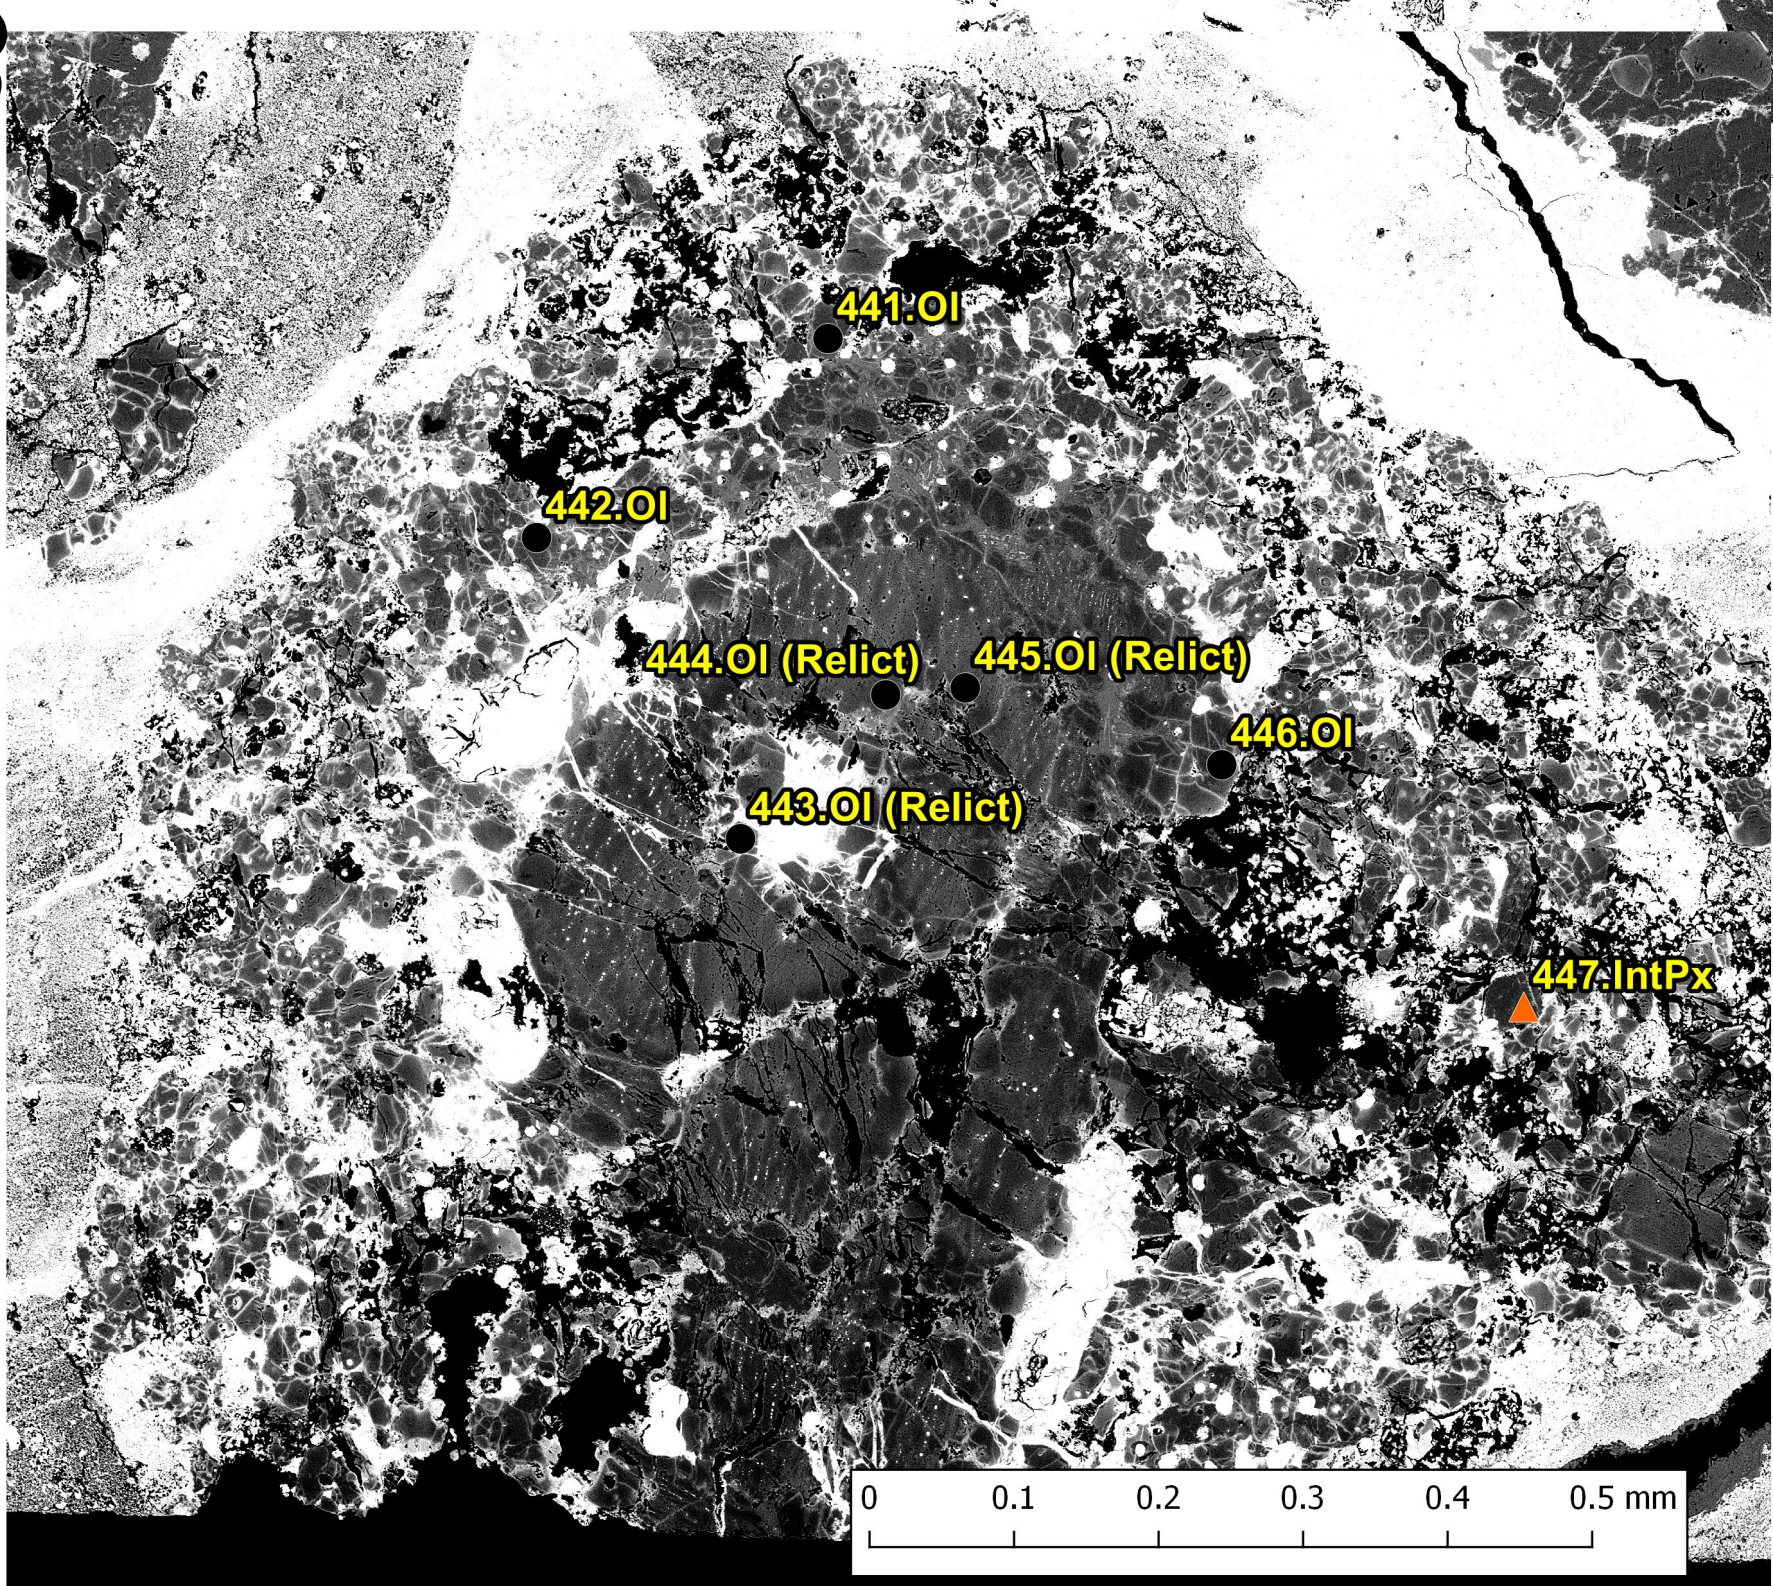

# N14

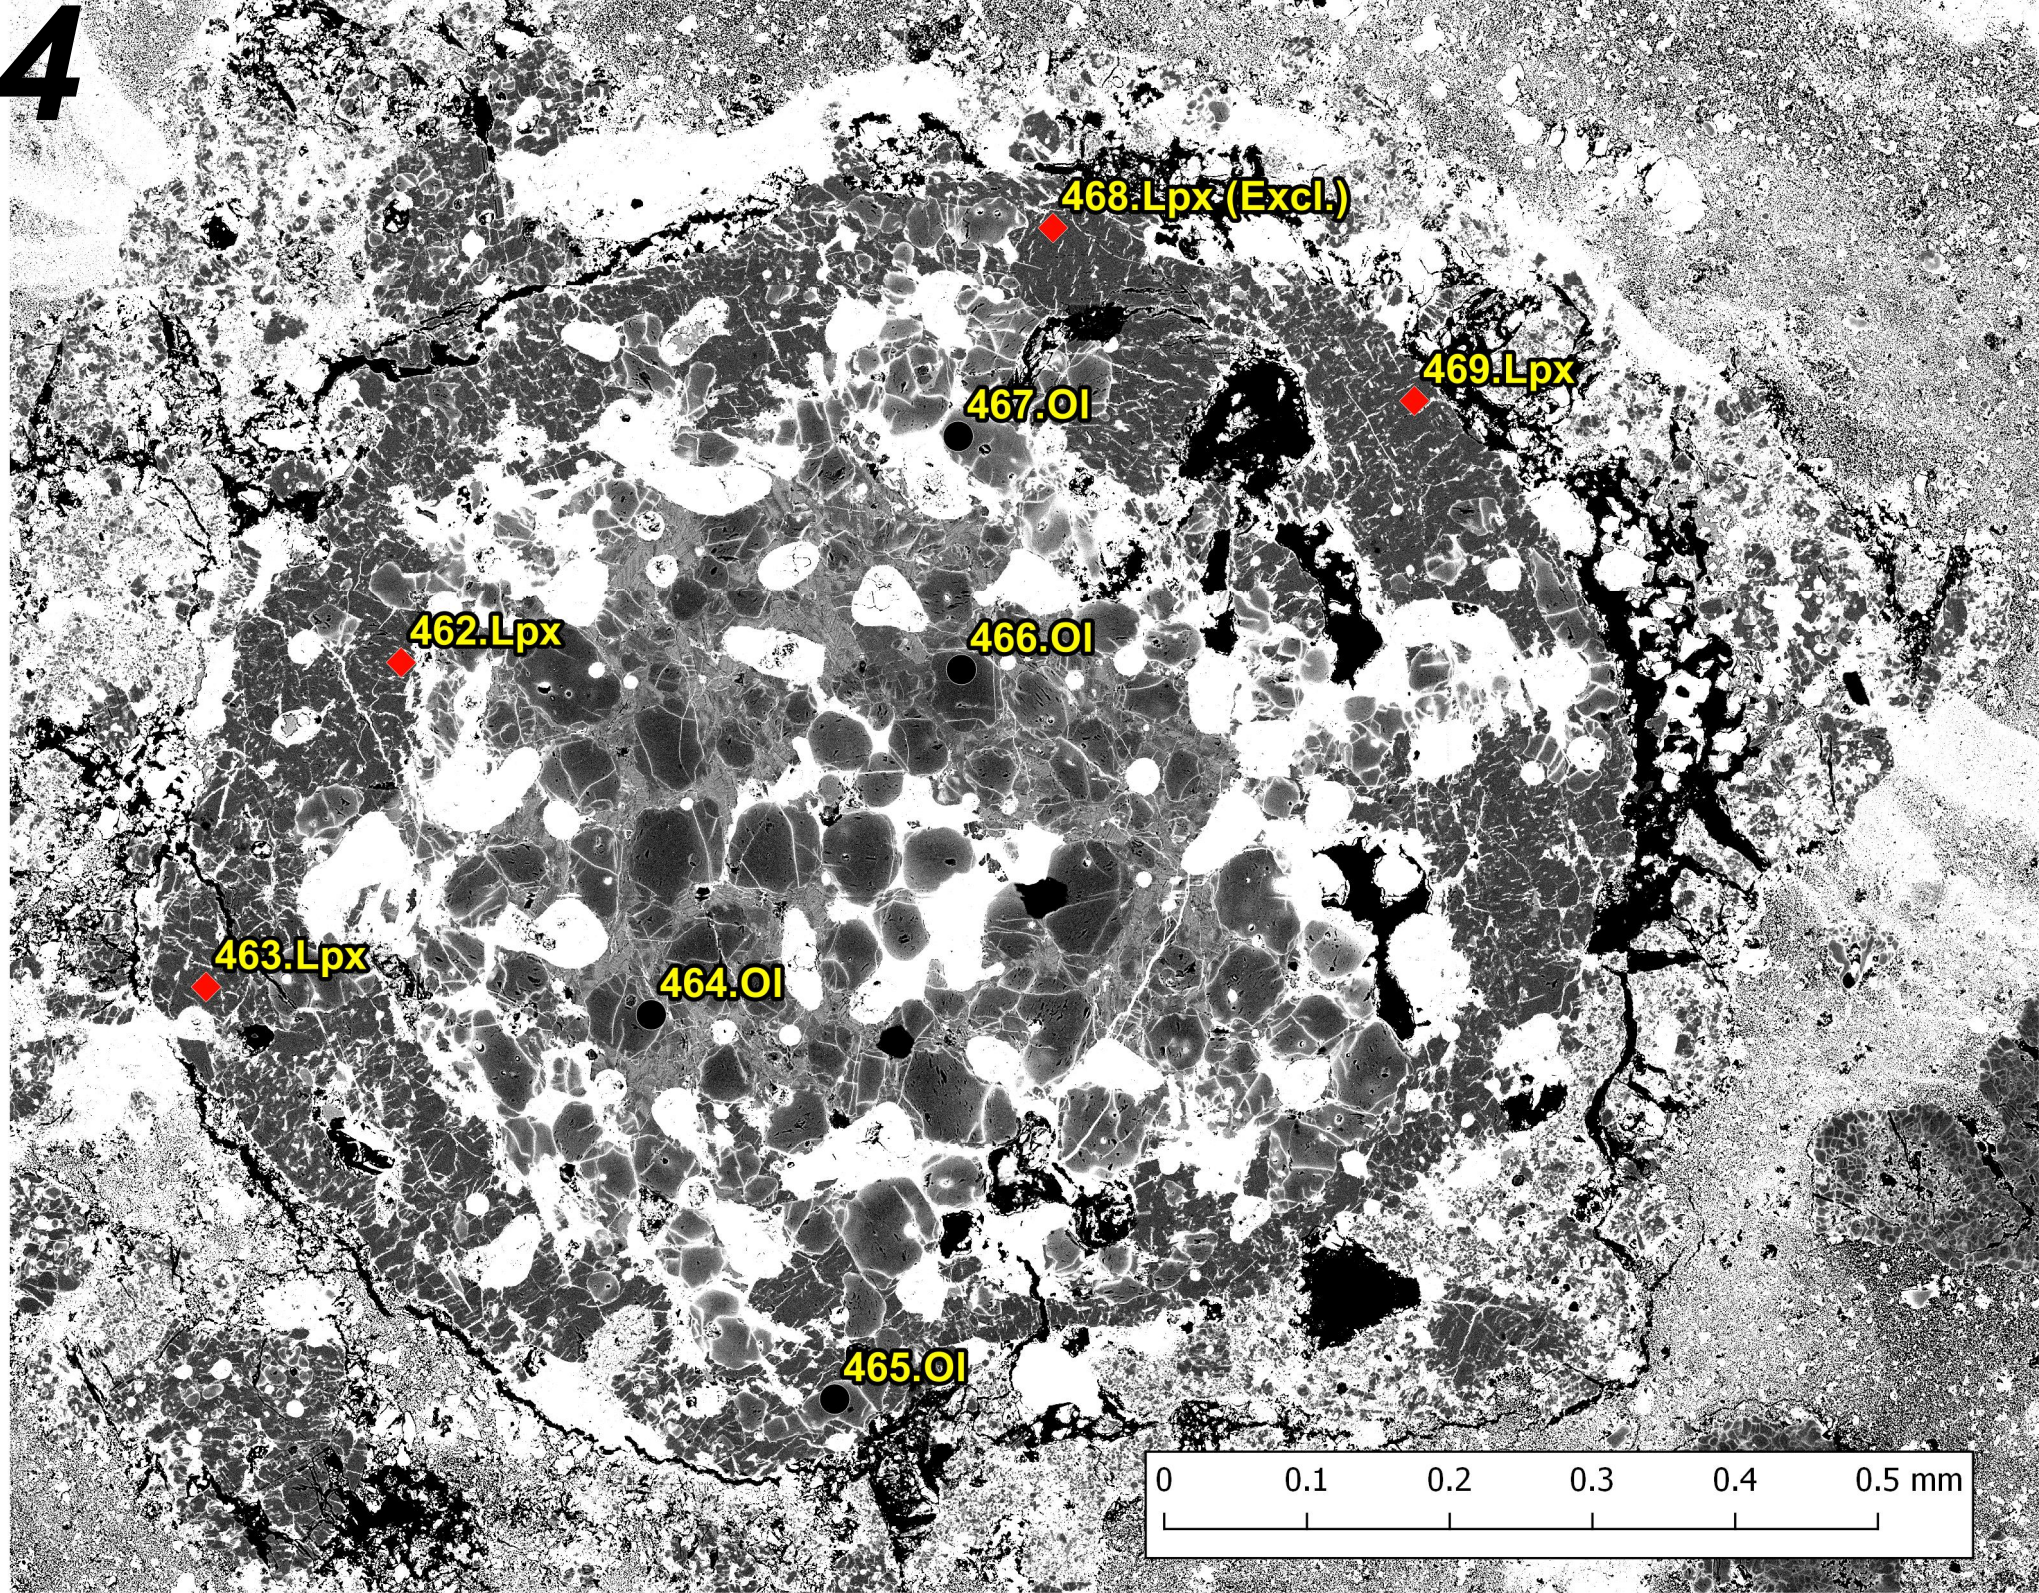

468.Lpx (Excl.)

469.Lpx

467.OI

462.Lpx

466.OI

463.Lpx

464.OI

465.OI

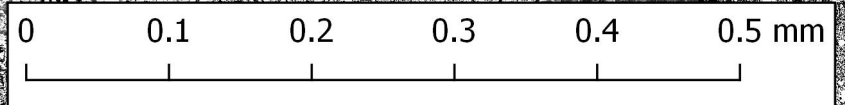



**N15**

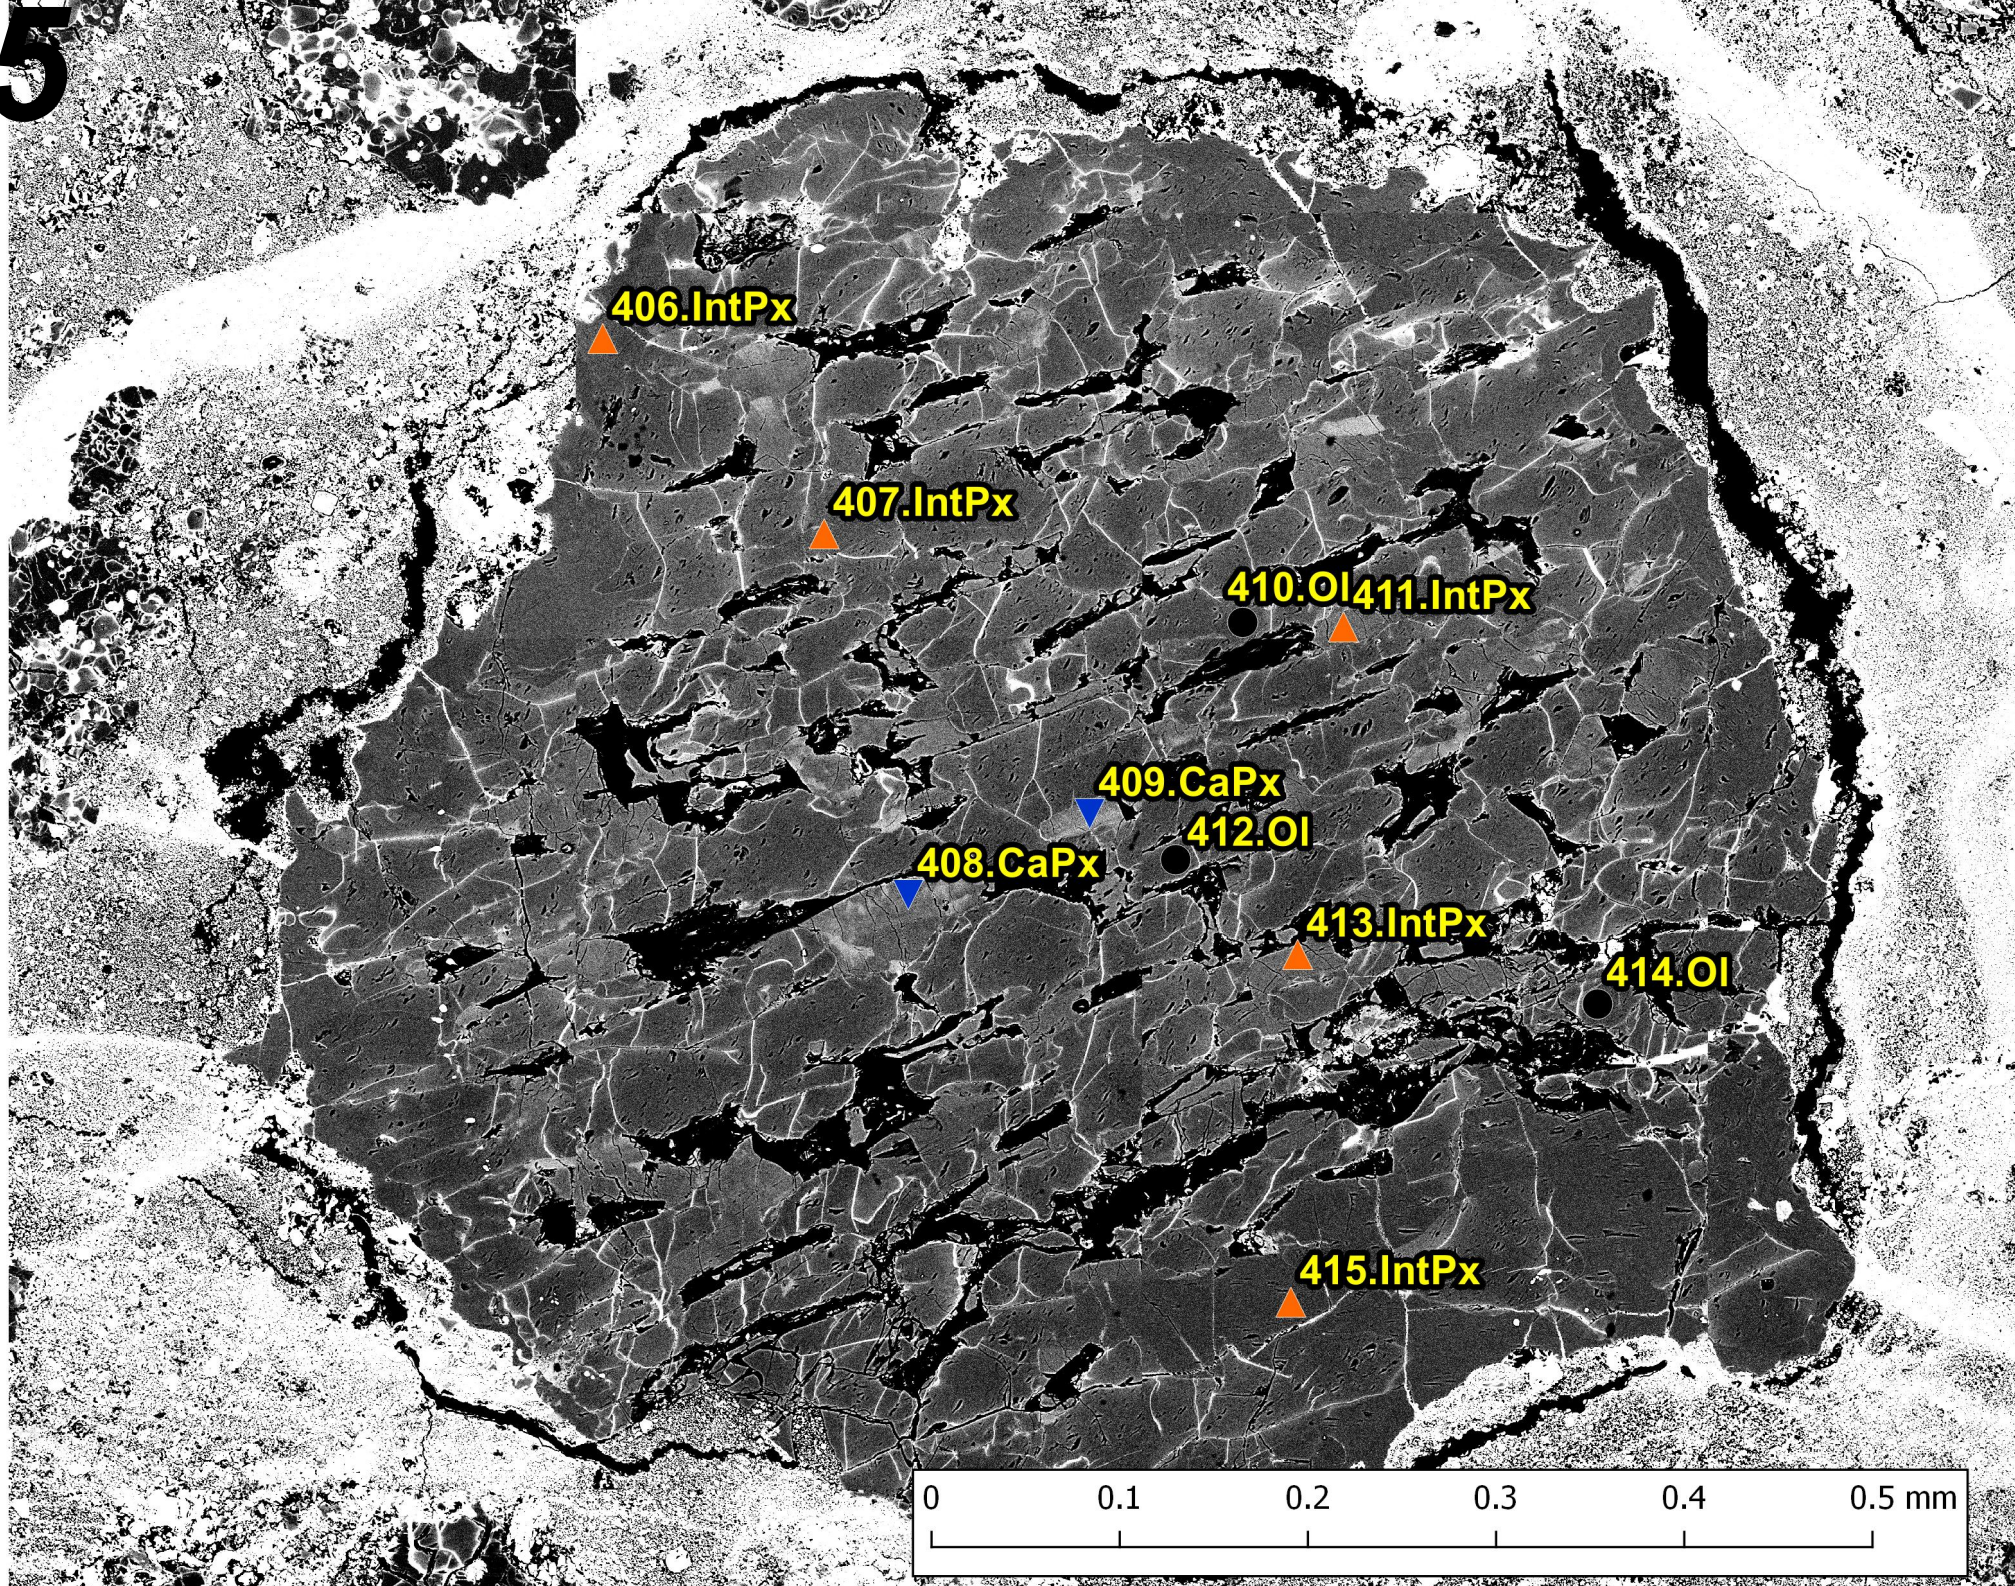

**406.IntPx**

**407.IntPx**

**410.Ol 411.IntPx**

**409.CaPx**

**408.CaPx**

**412.Ol**

**413.IntPx**

**414.Ol**

**415.IntPx**

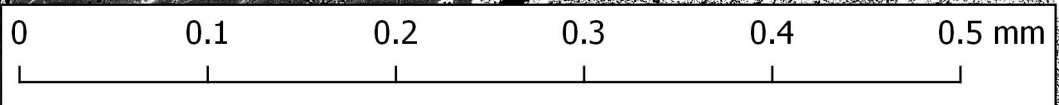

**N16**

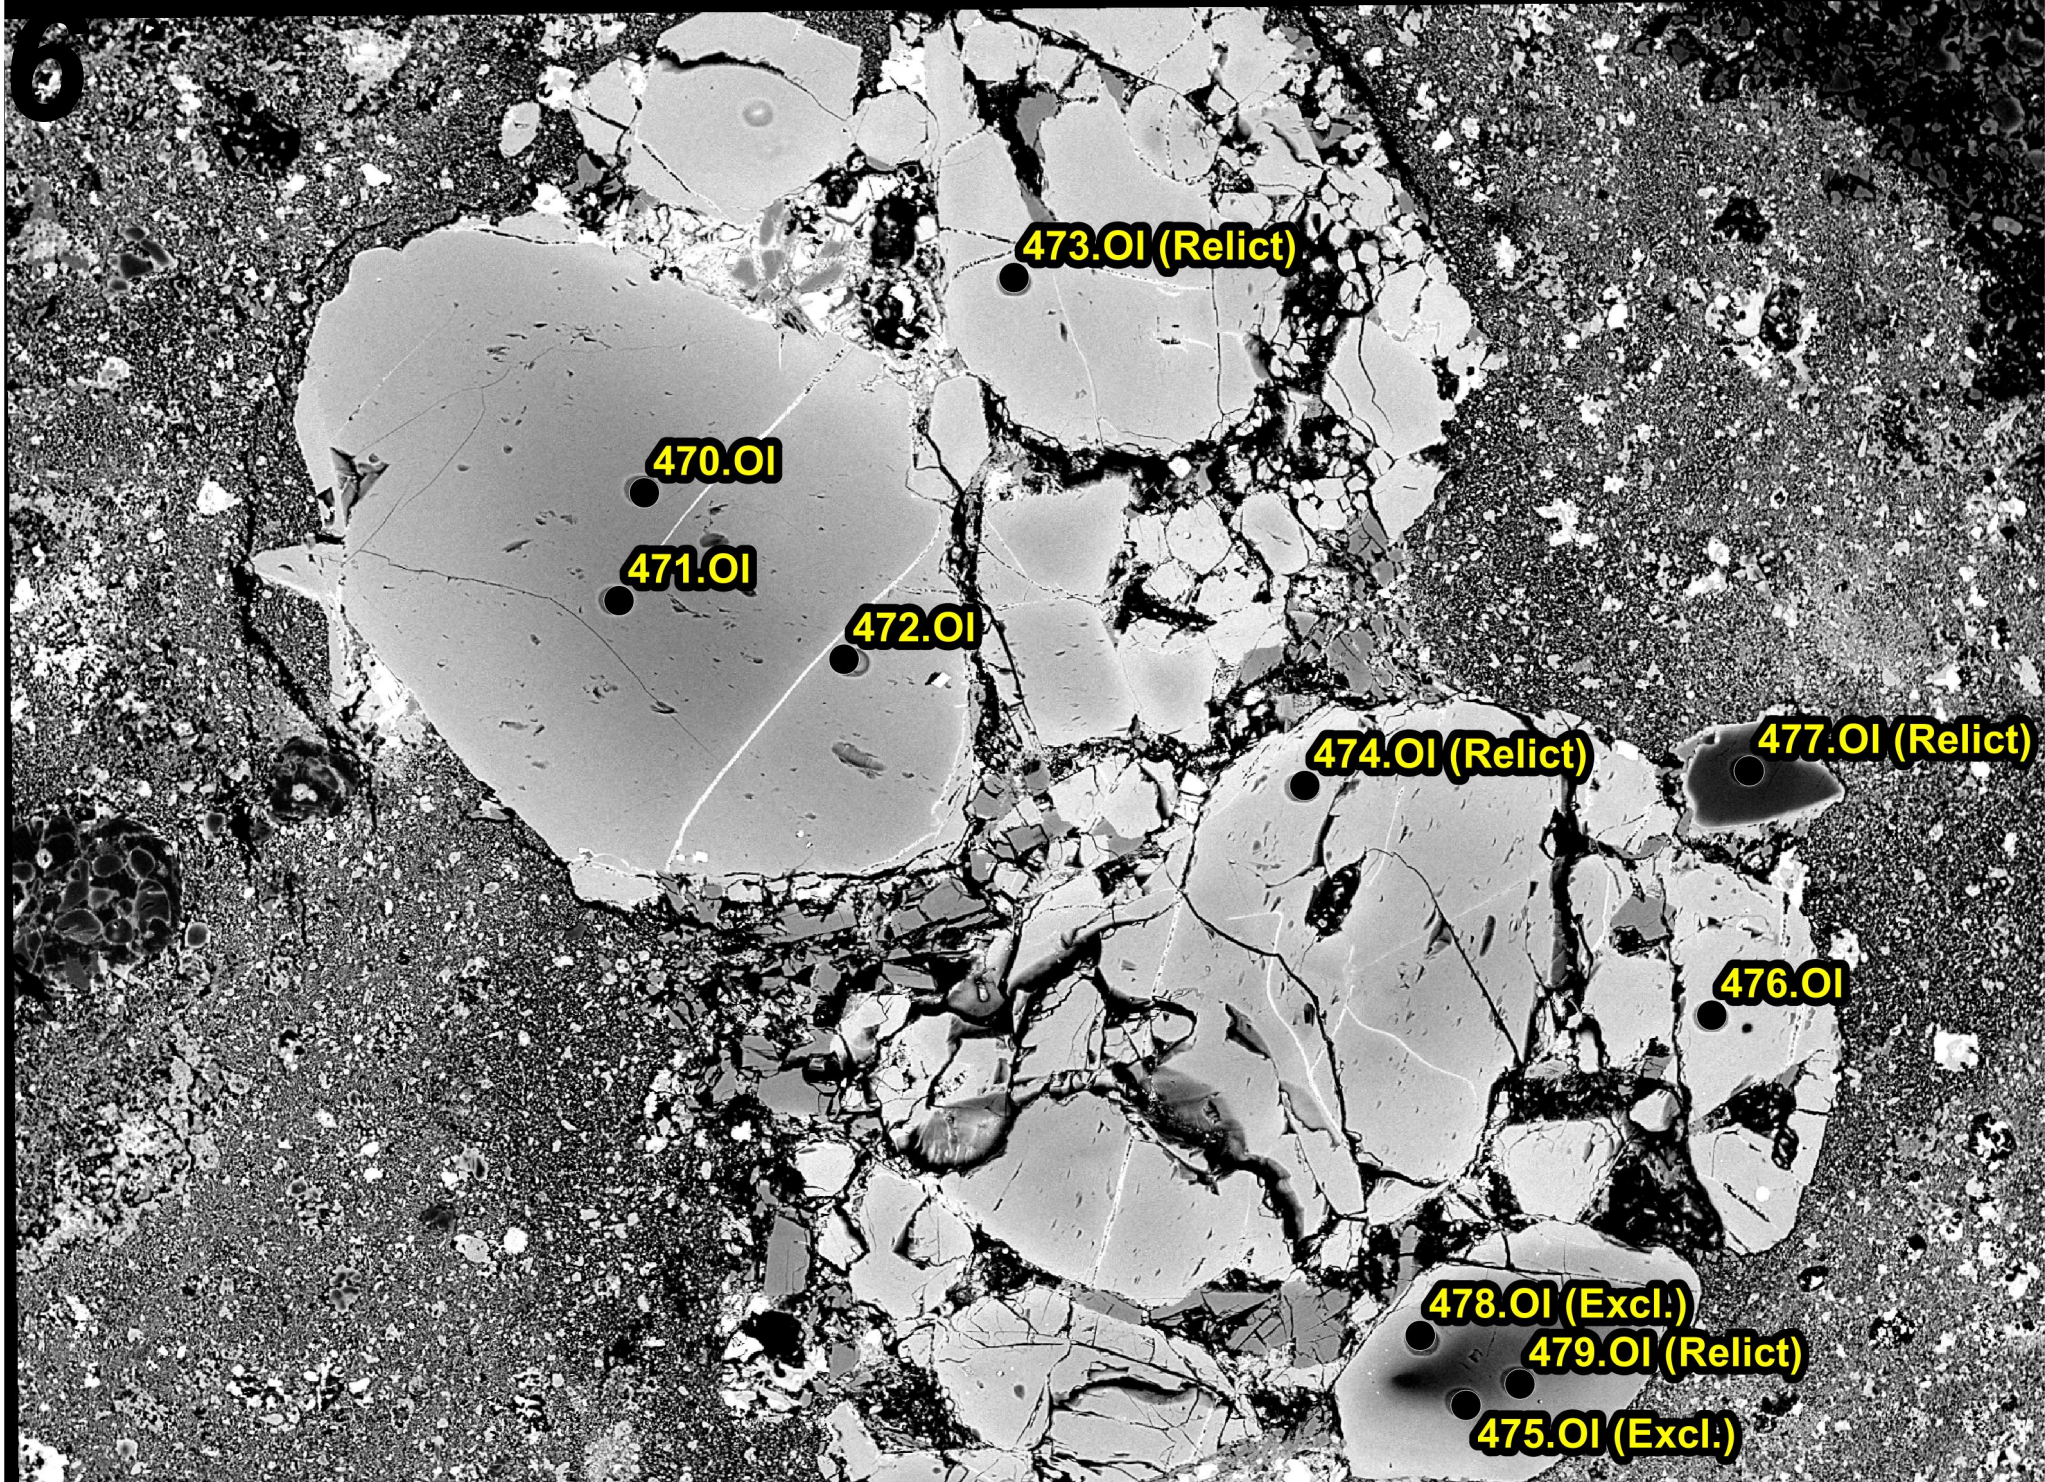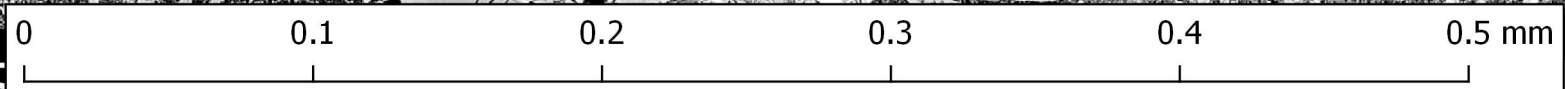

15.0kV x170 BS

# N17

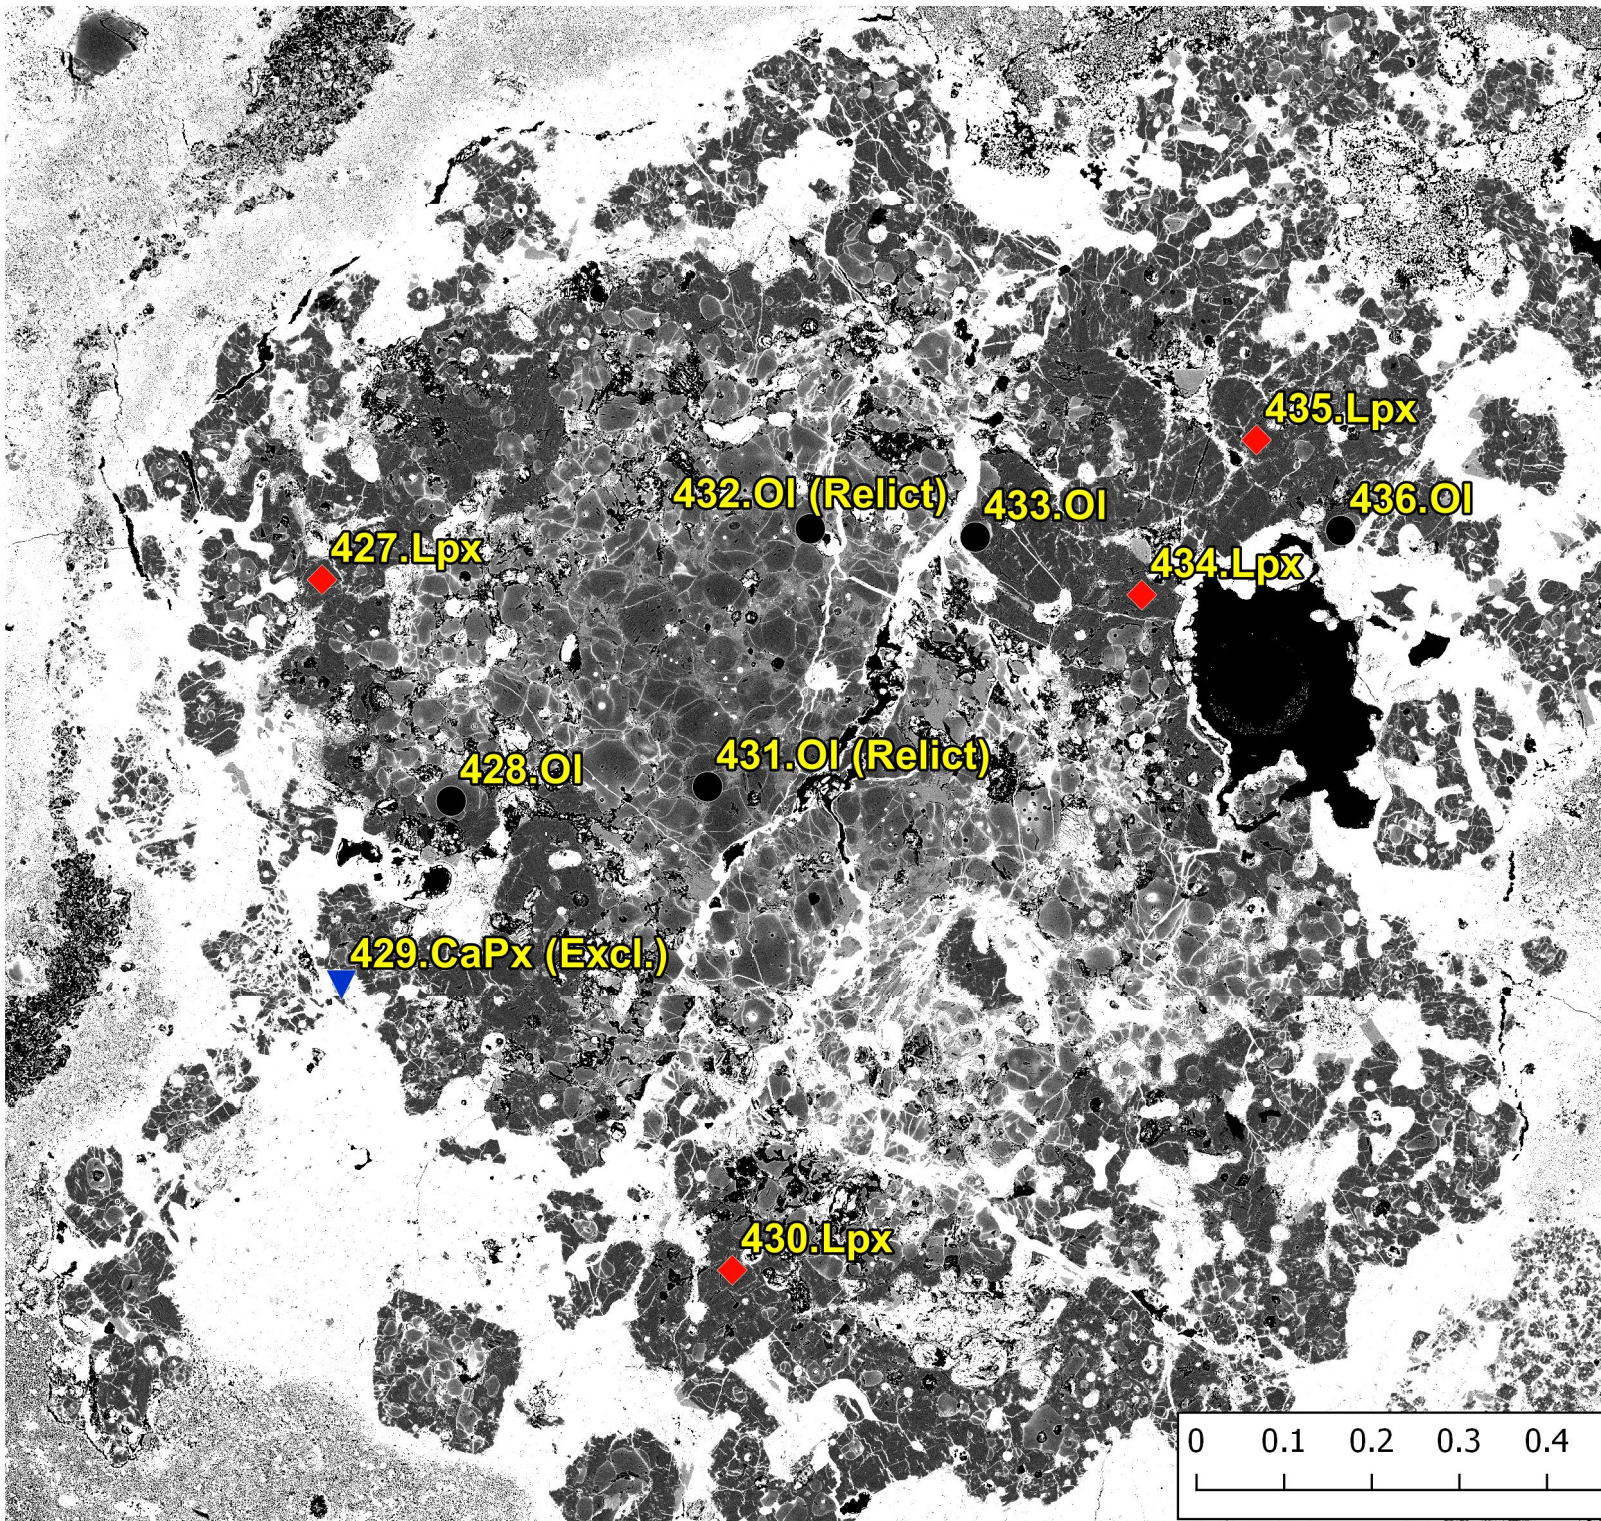

# N18

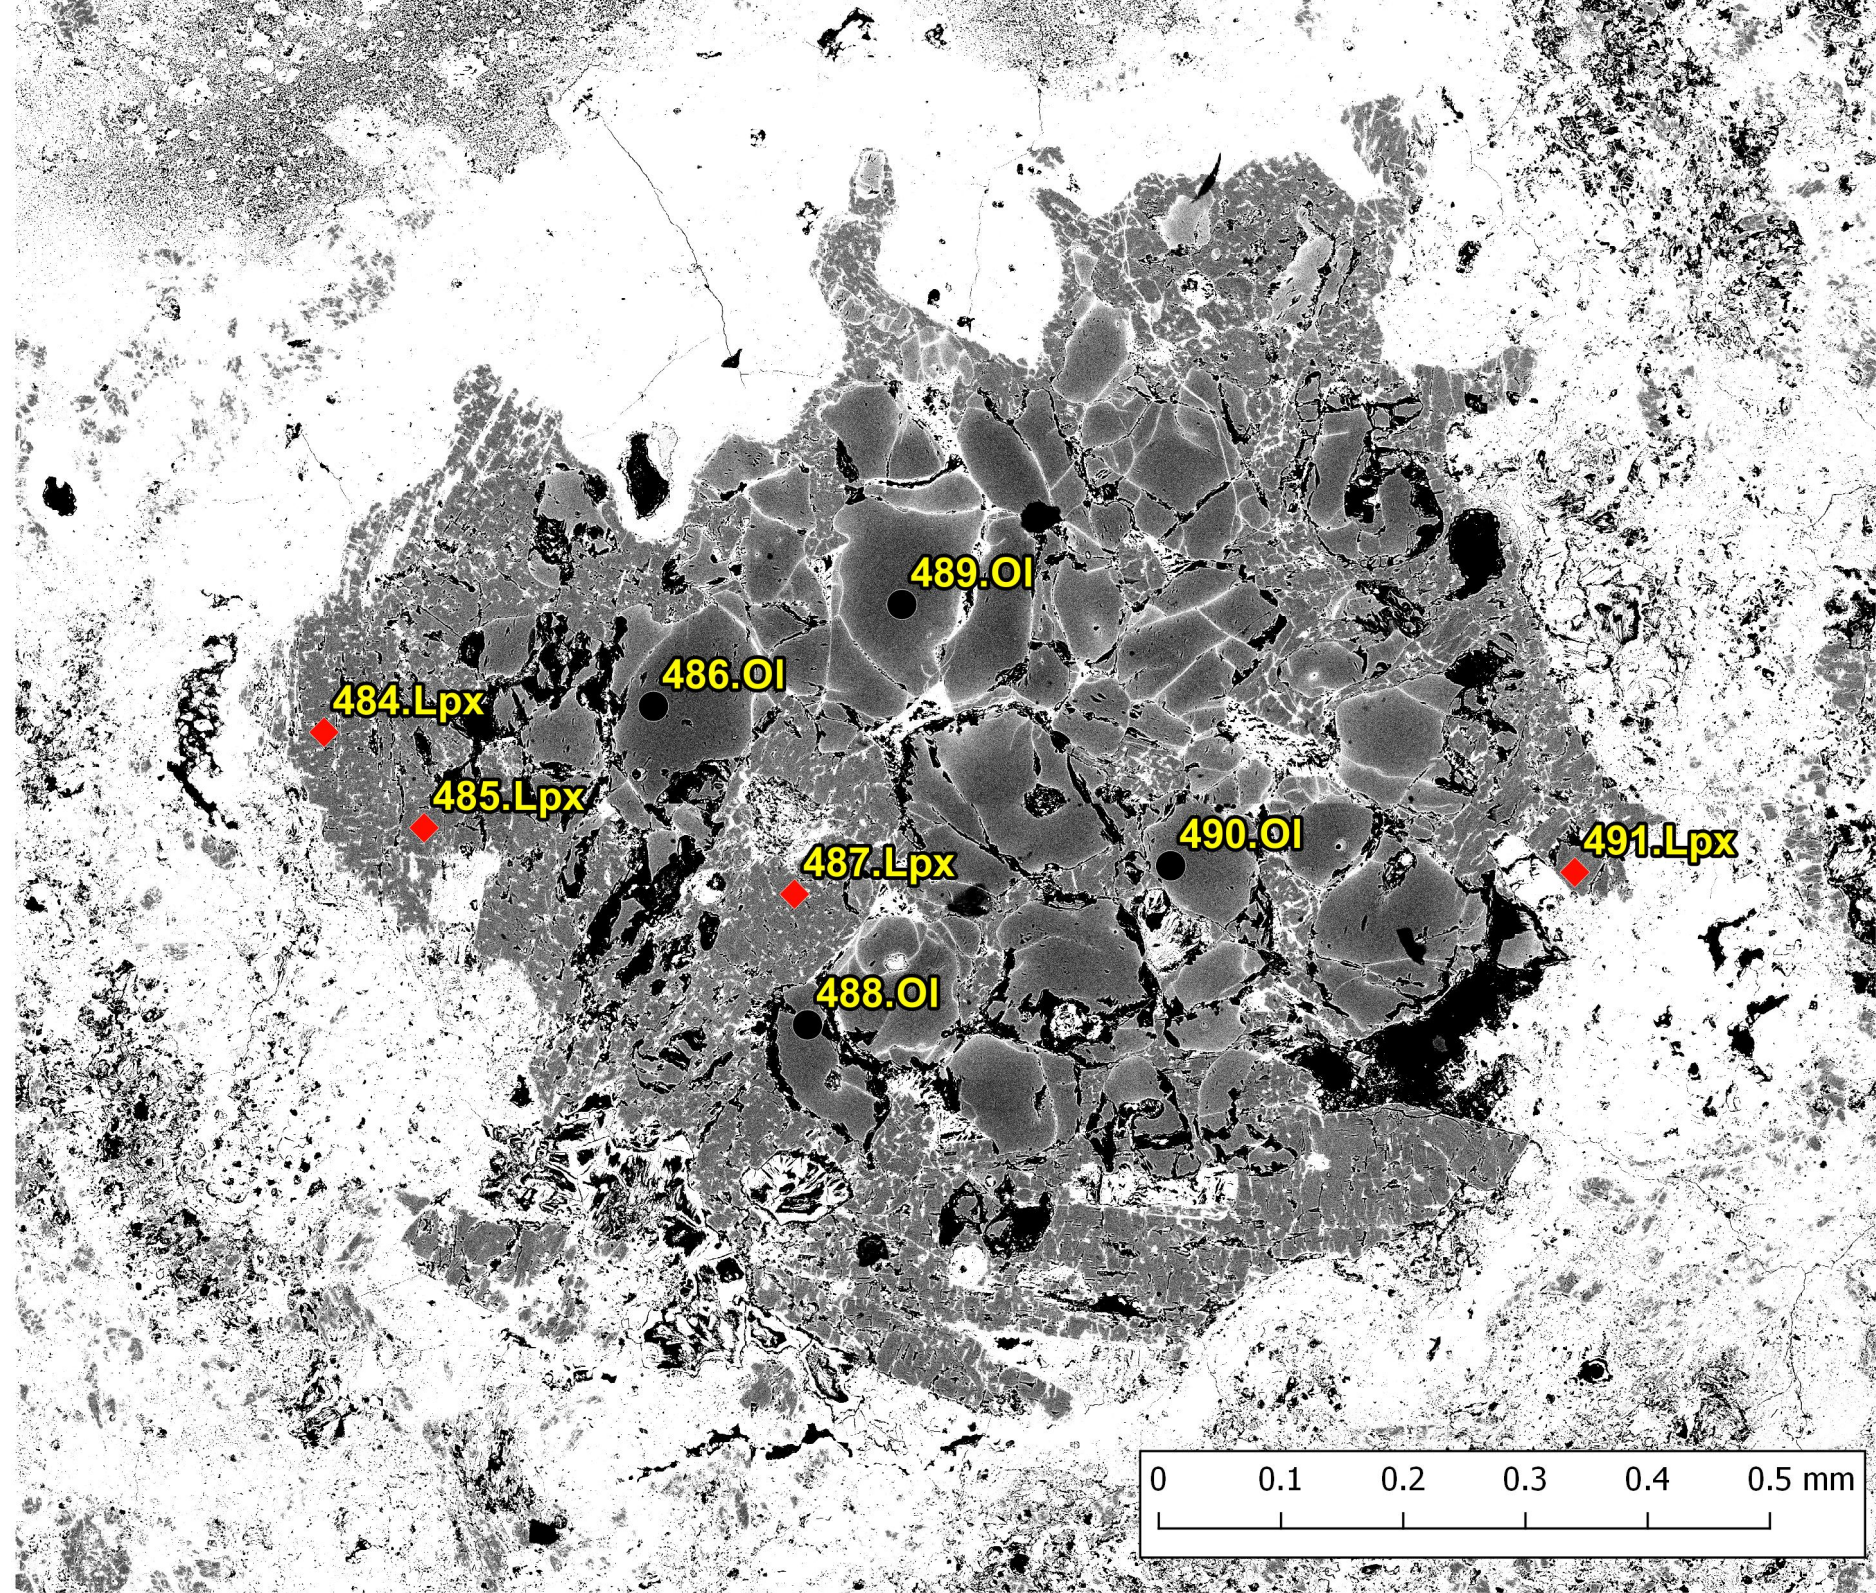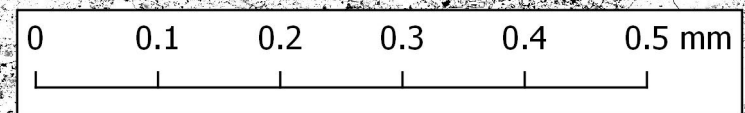

# N19

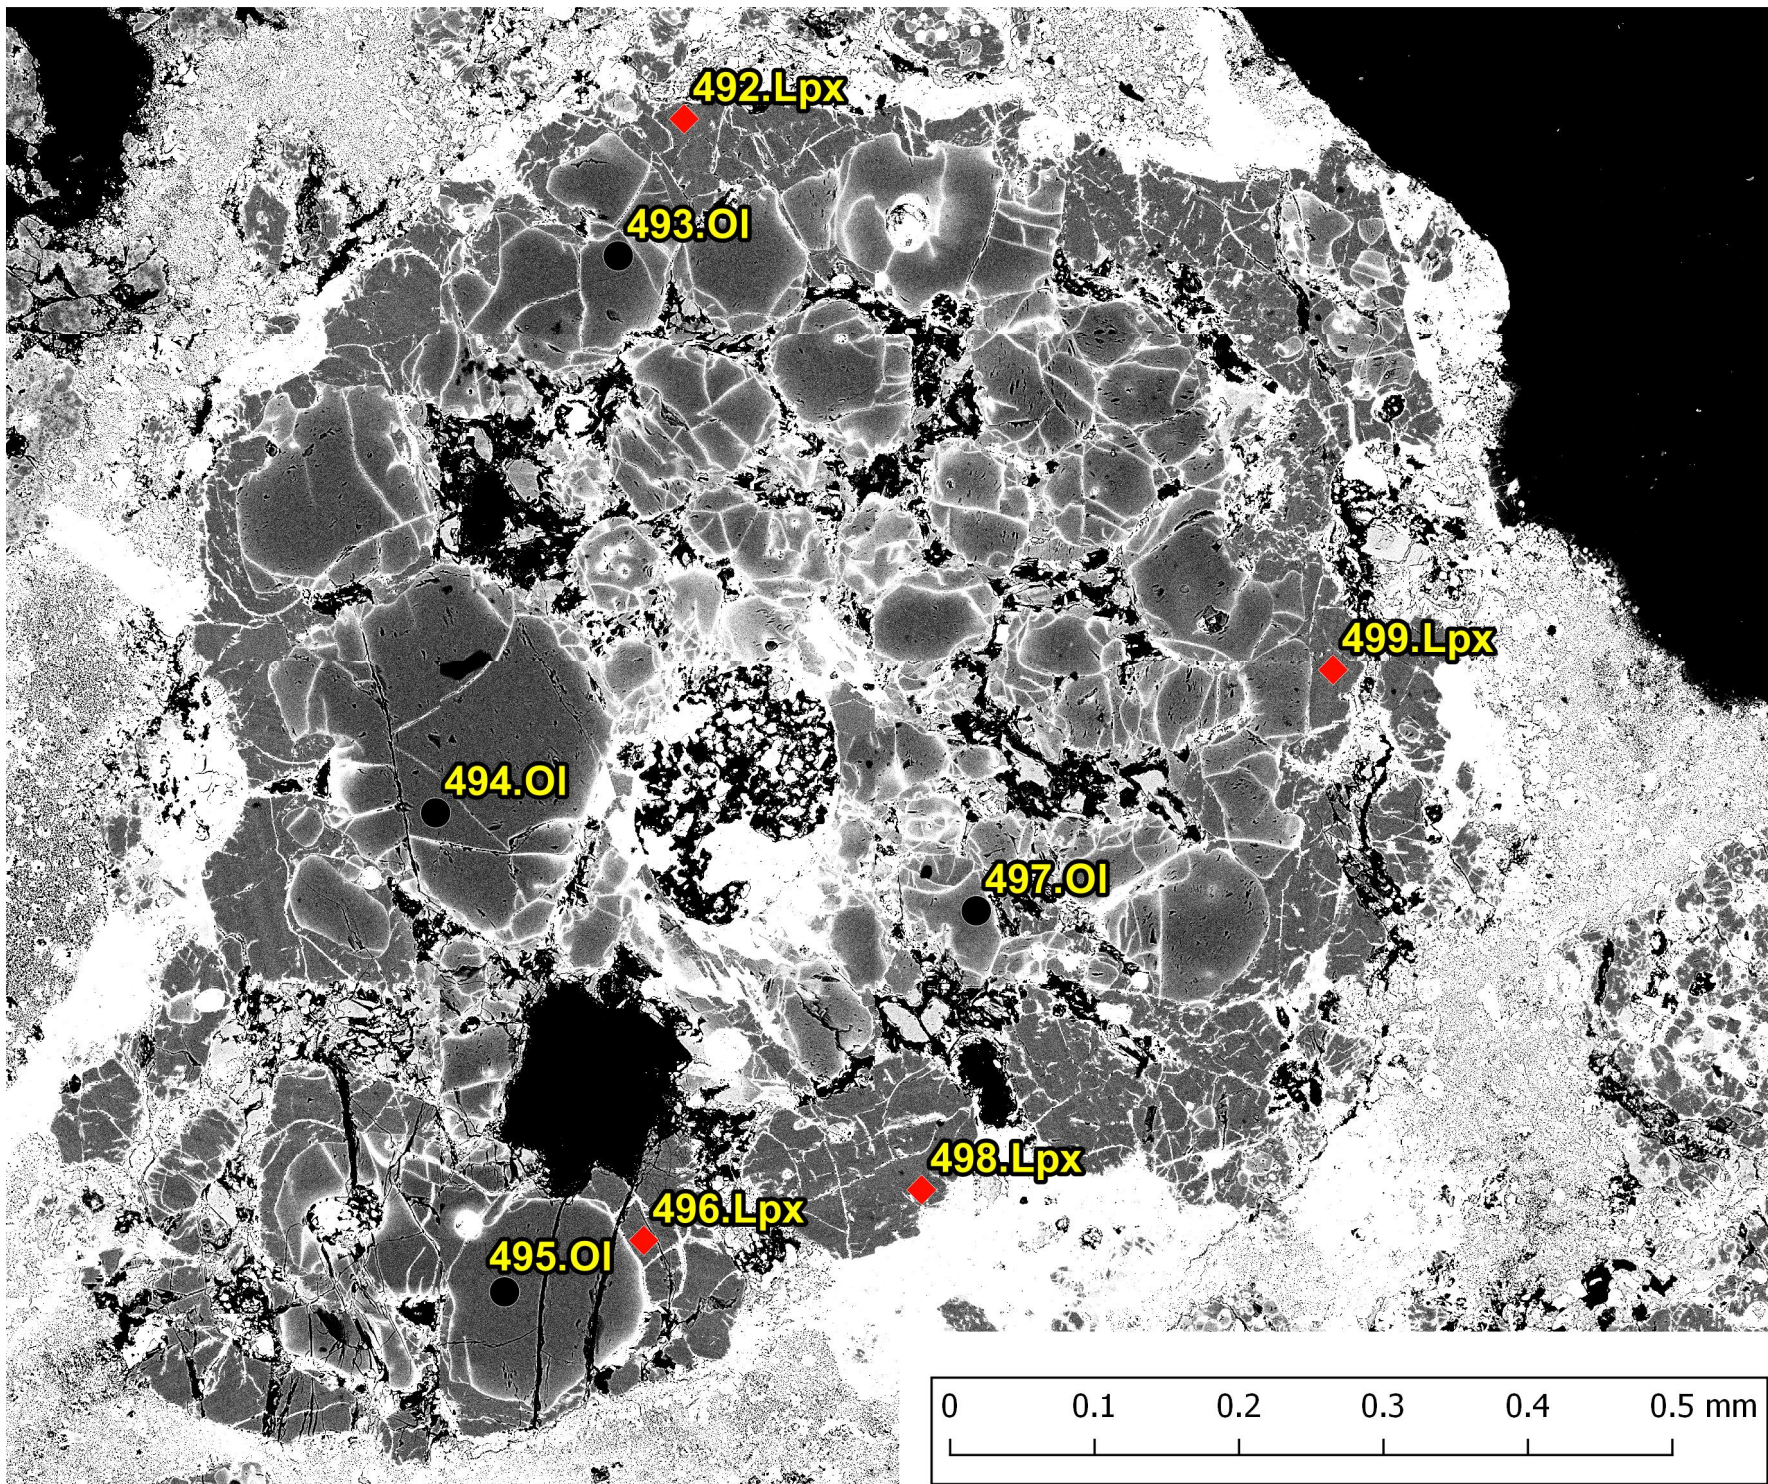

# N20

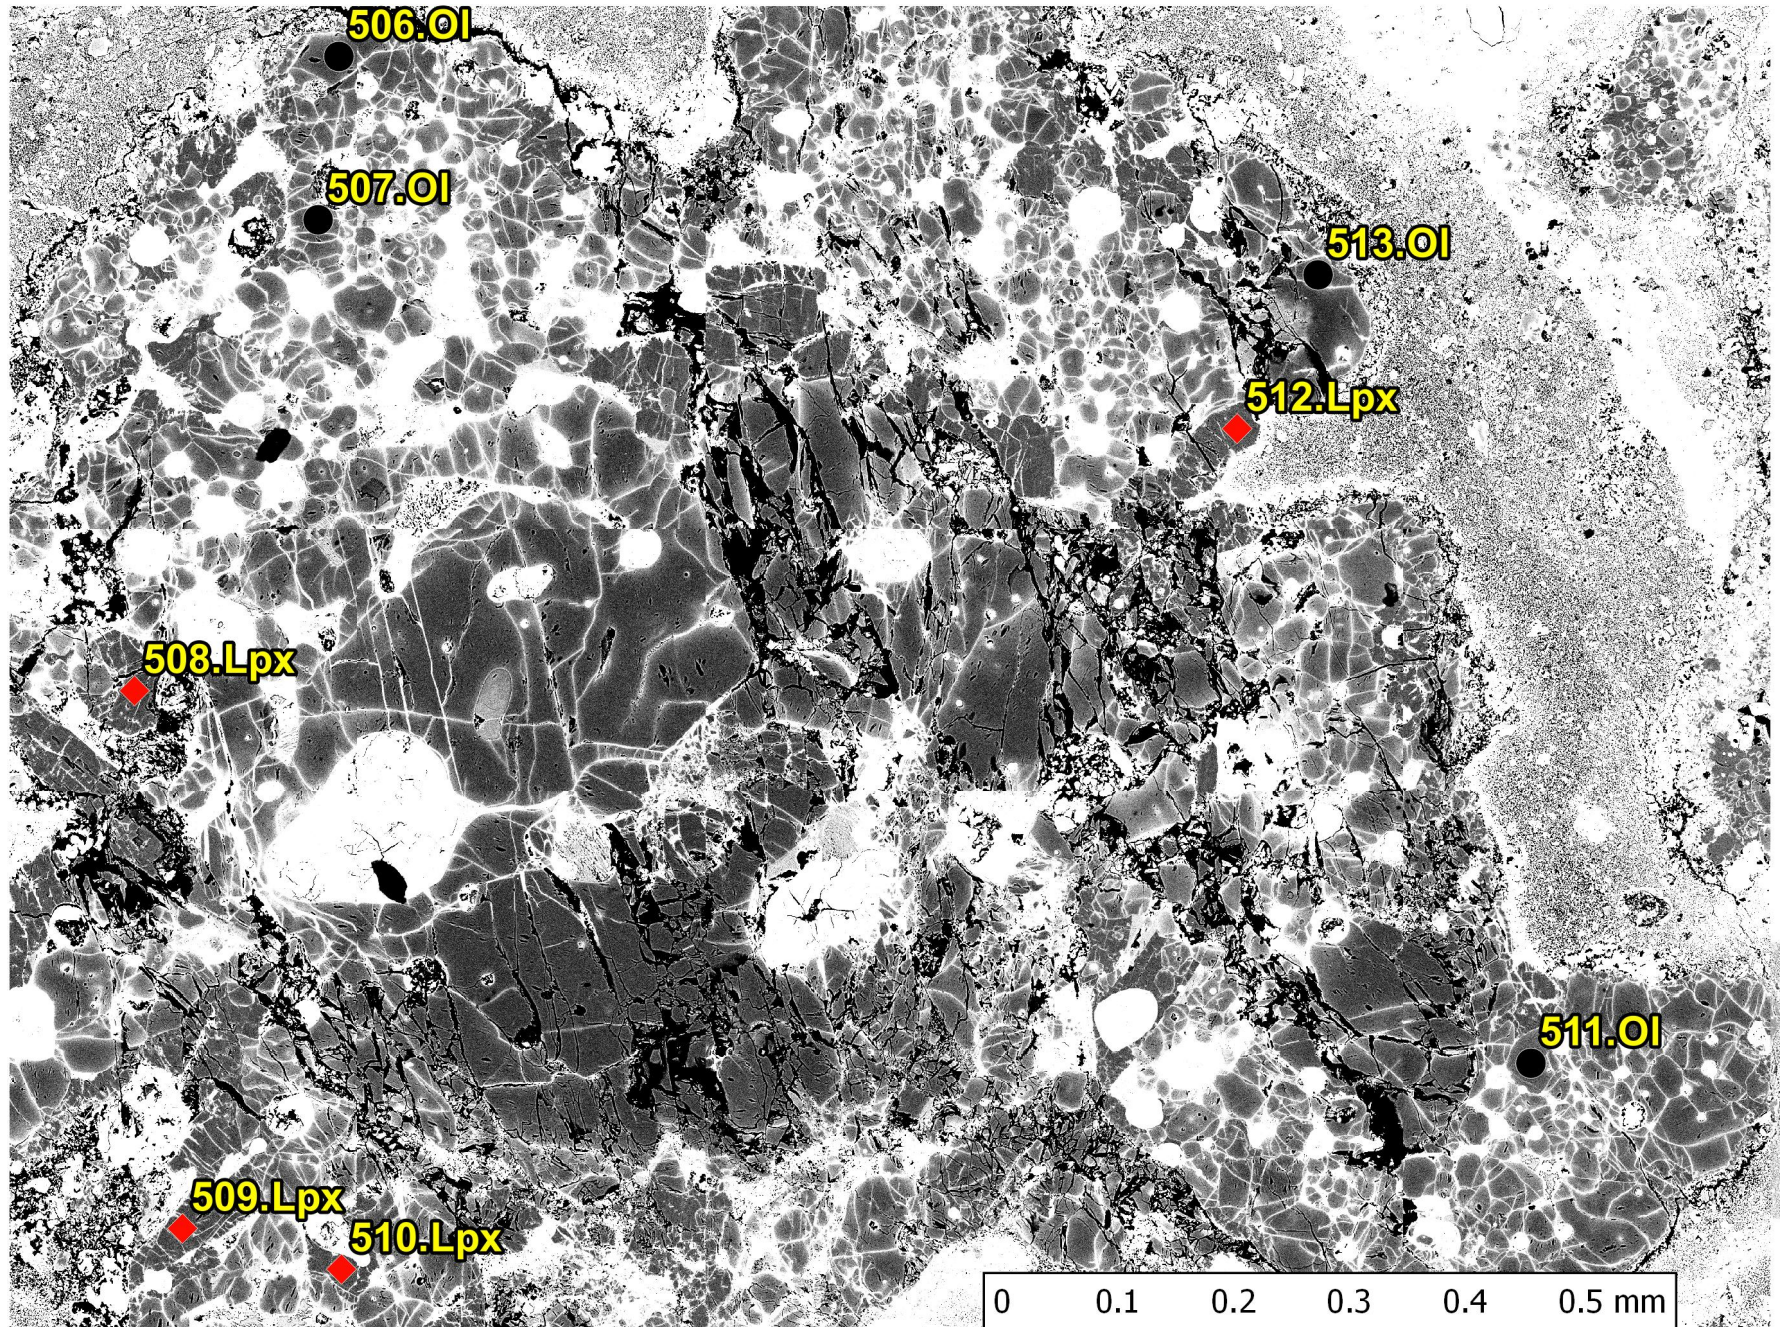

# N21

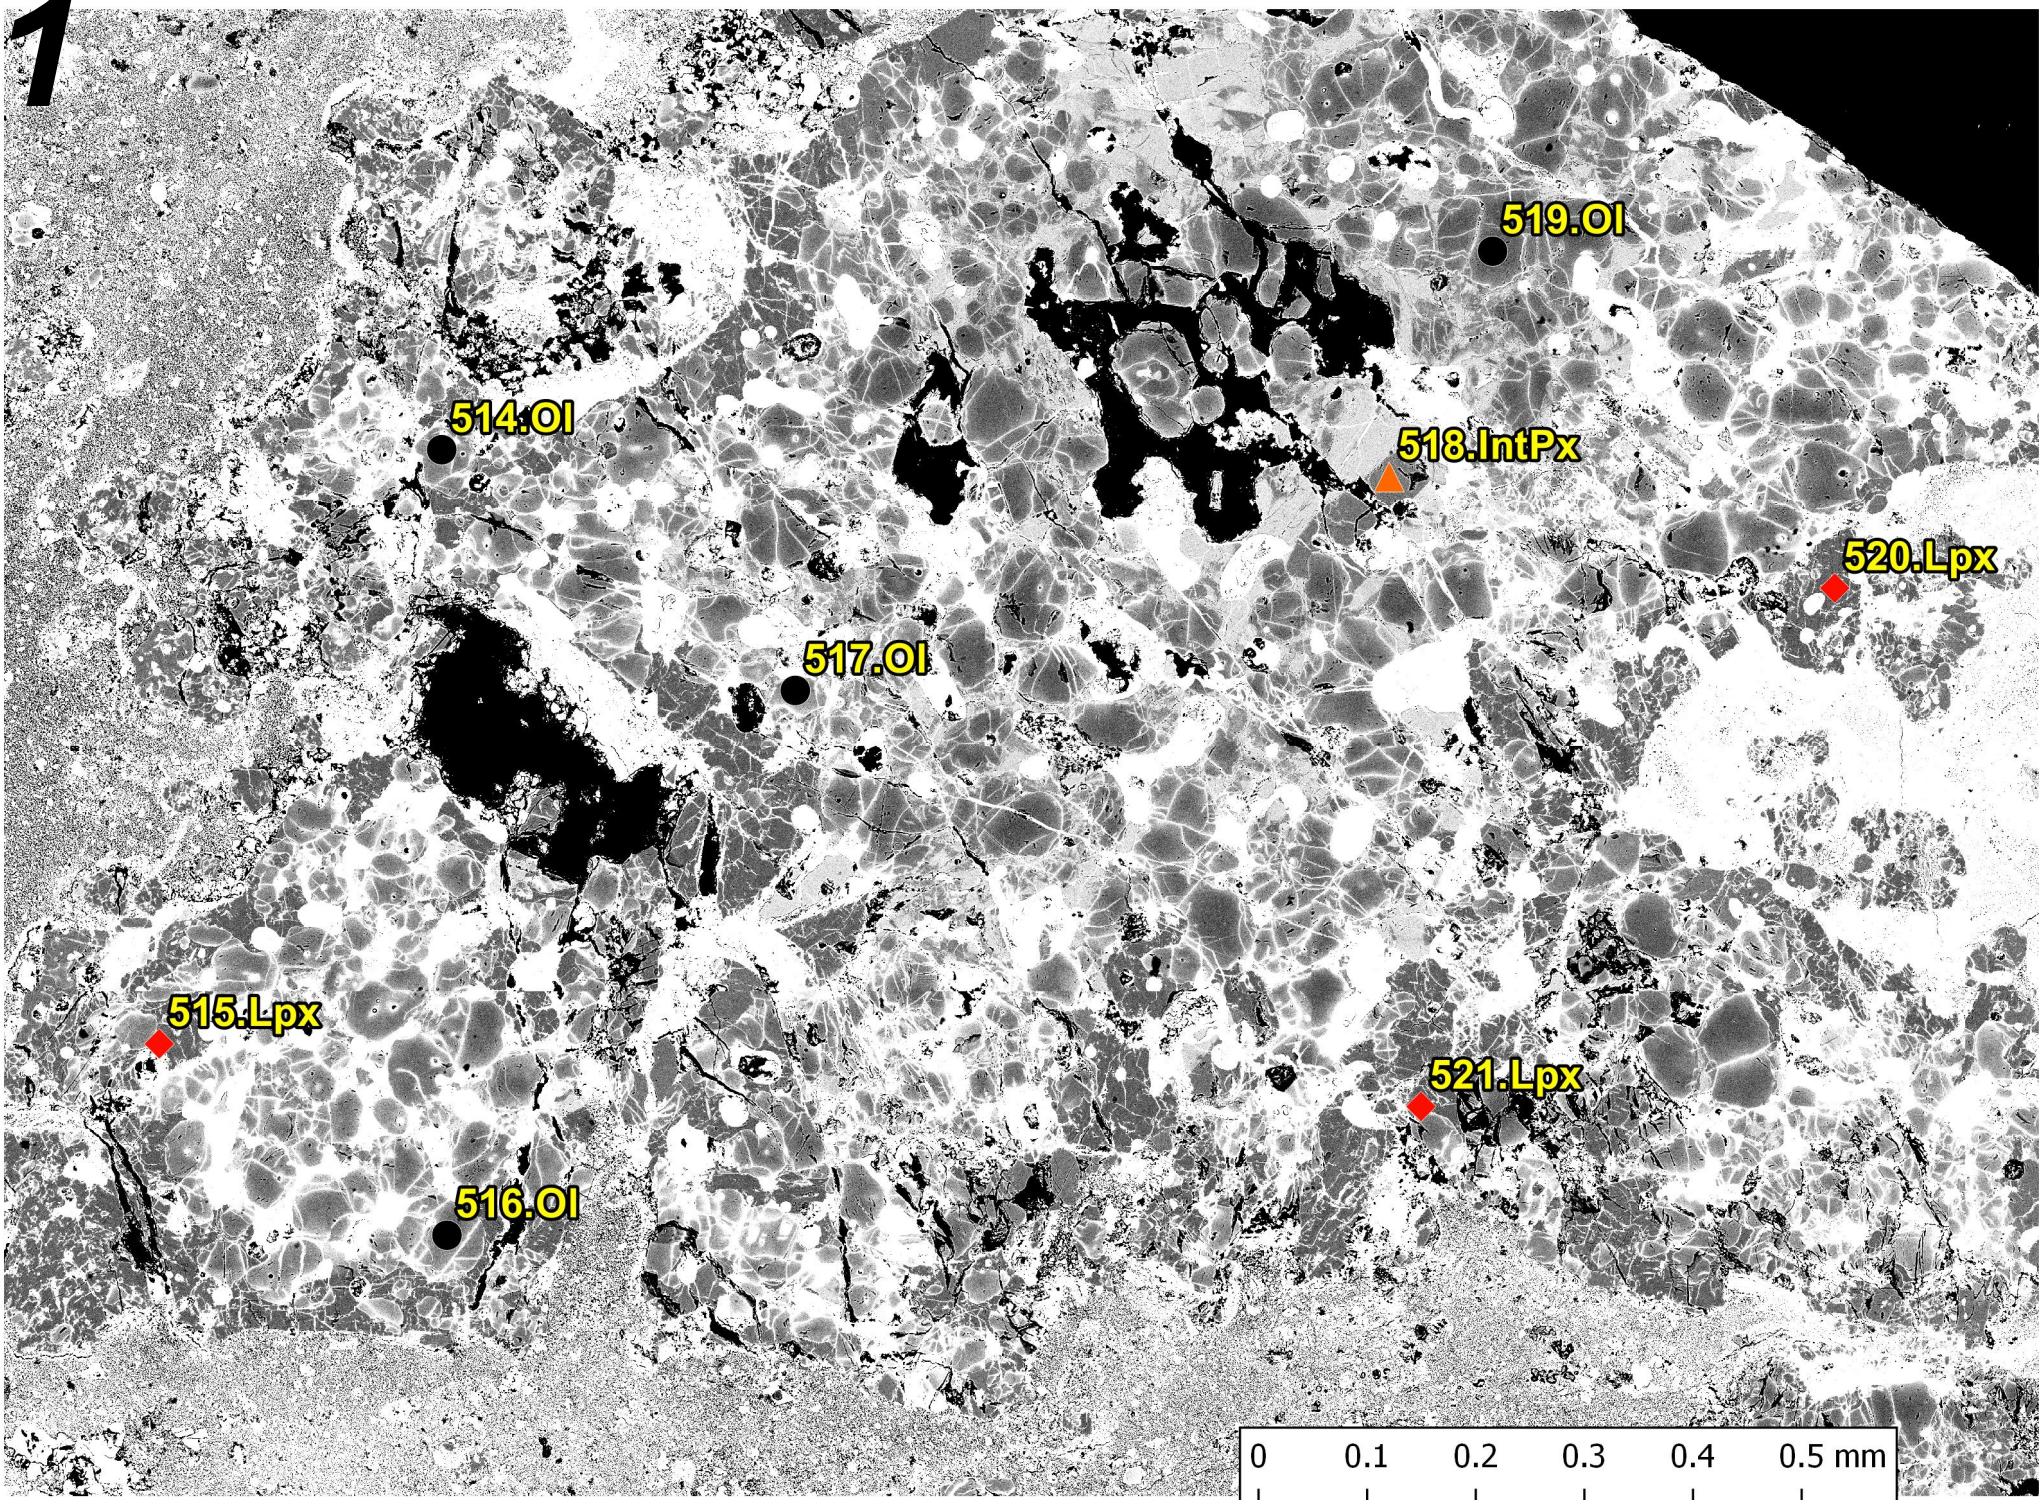

514.OI

519.OI

518.IntPx

520.Lpx

517.OI

515.Lpx

521.Lpx

516.OI

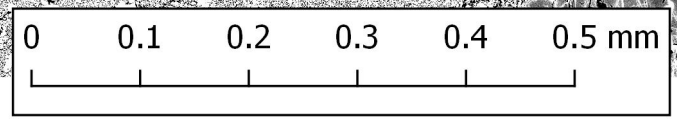

# N22

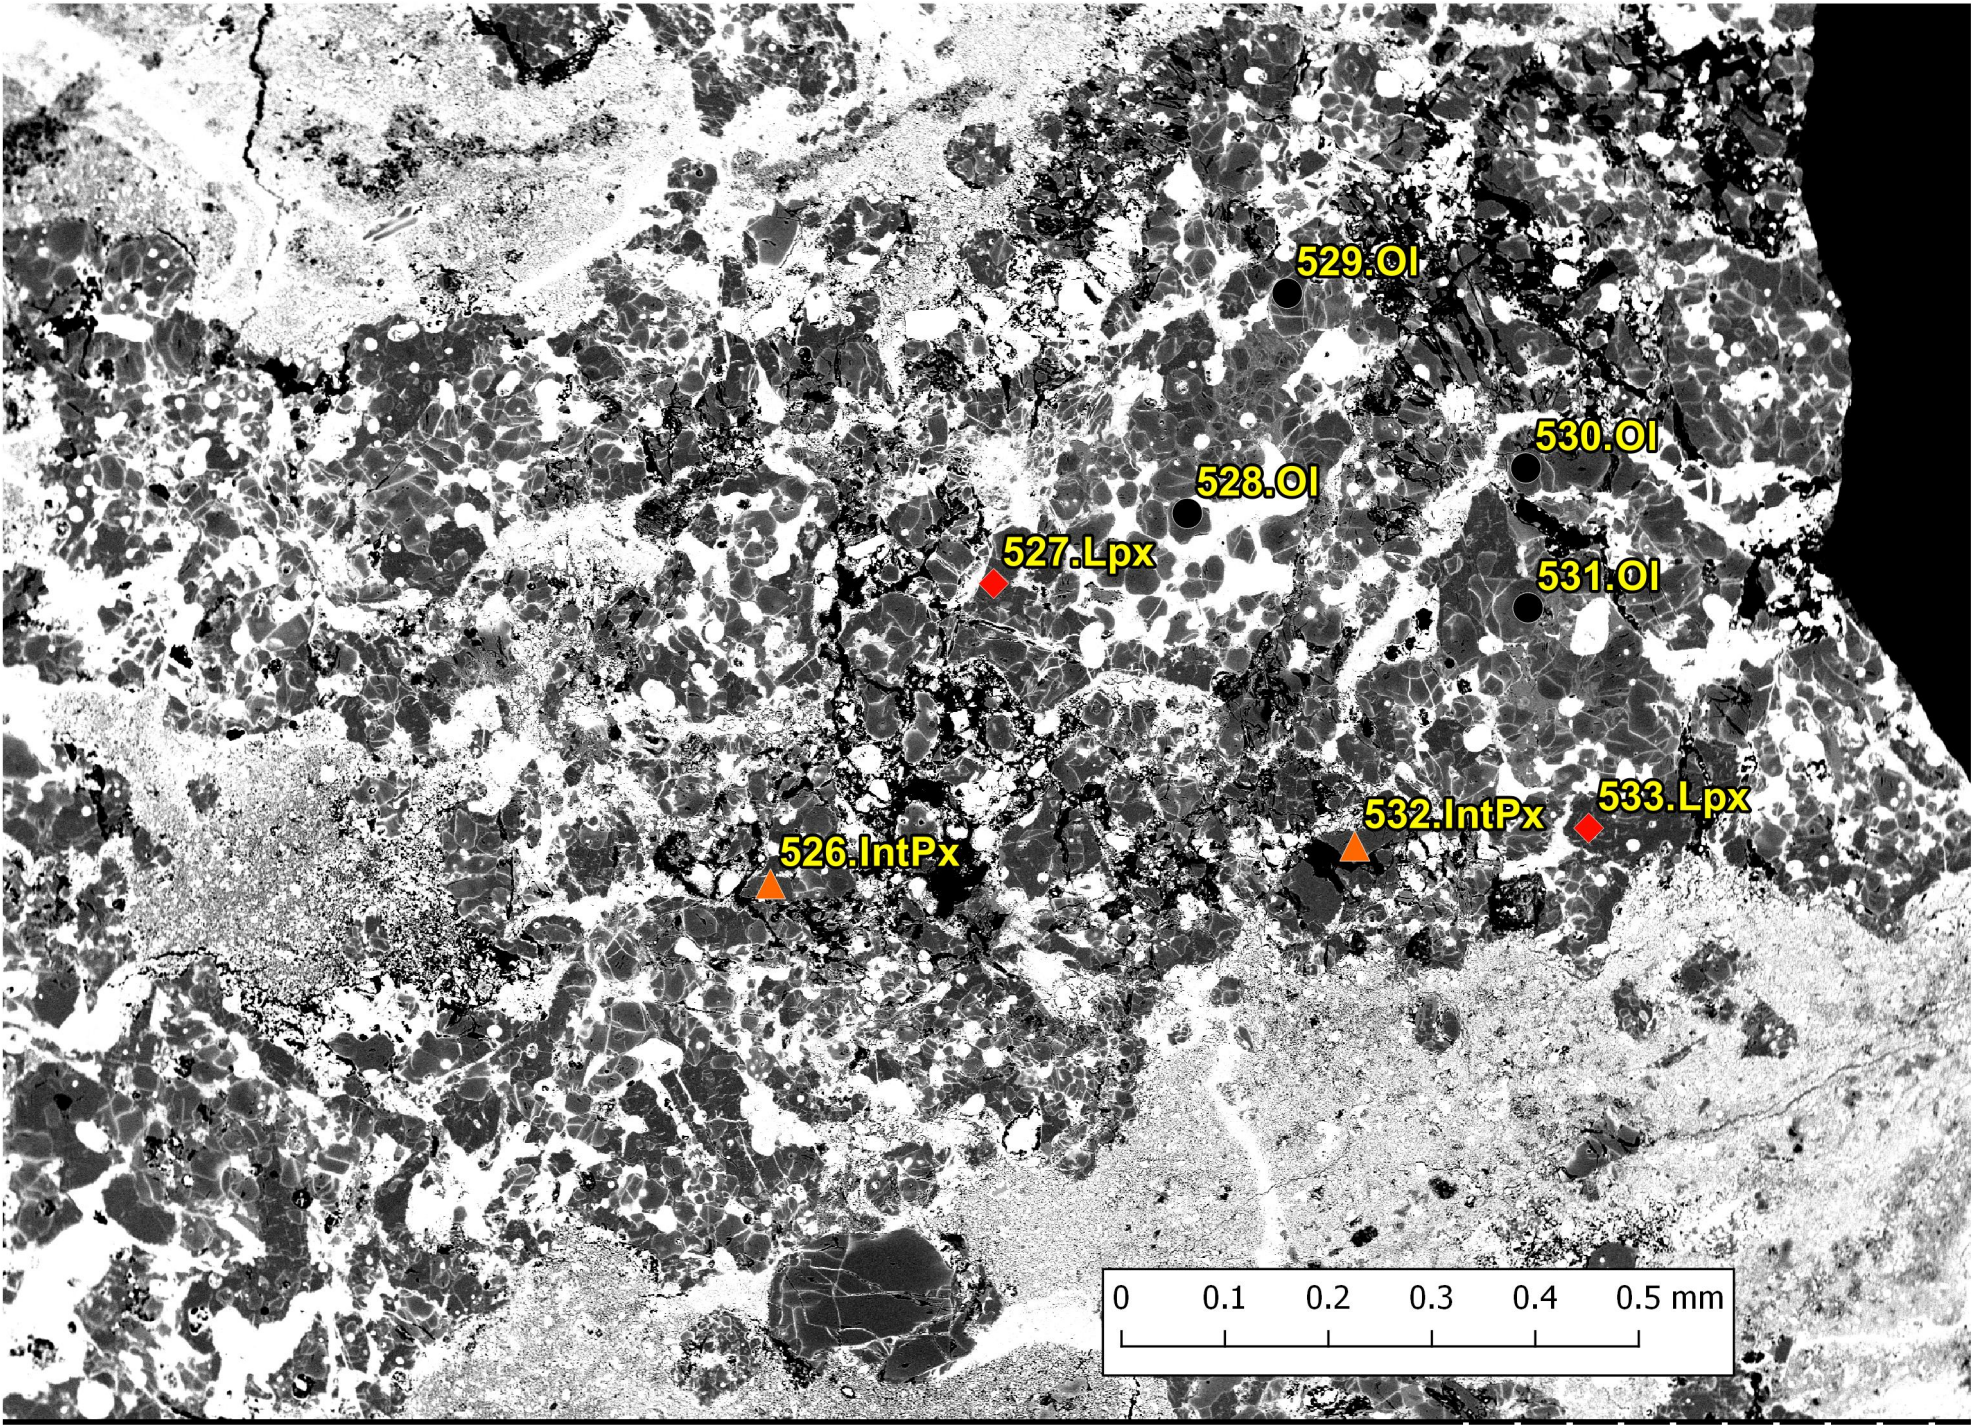



# N23

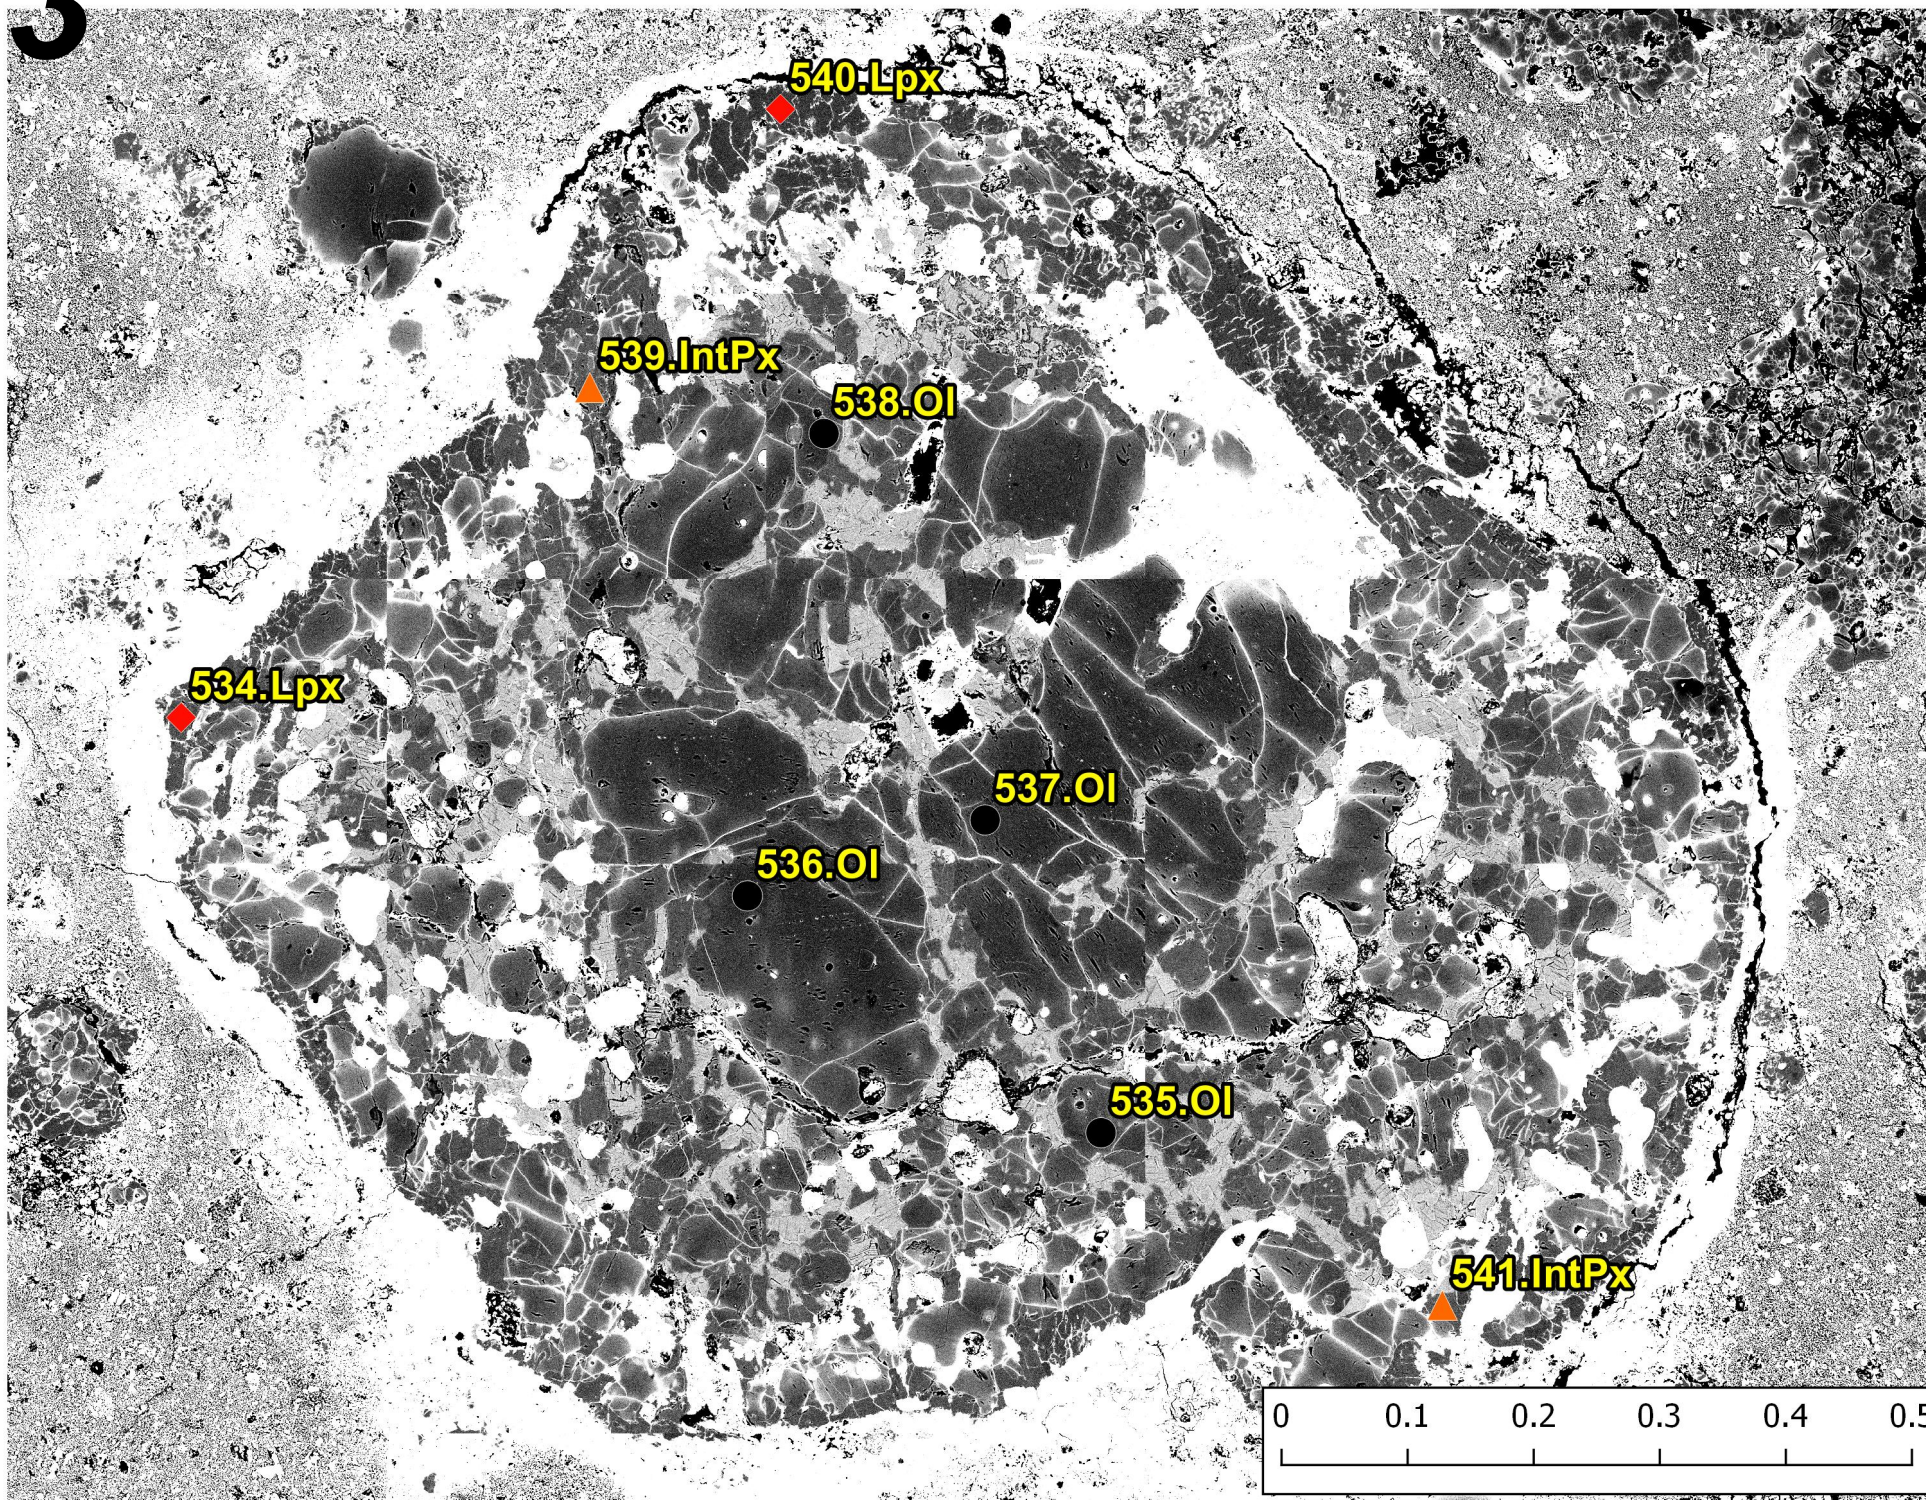

534.Lpx

540.Lpx

539.IntPx

538.OI

537.OI

536.OI

535.OI

541.IntPx

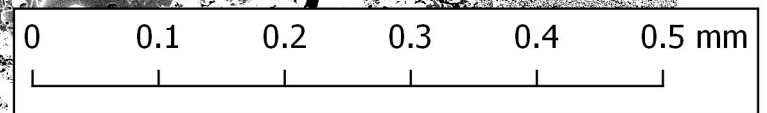

# N24

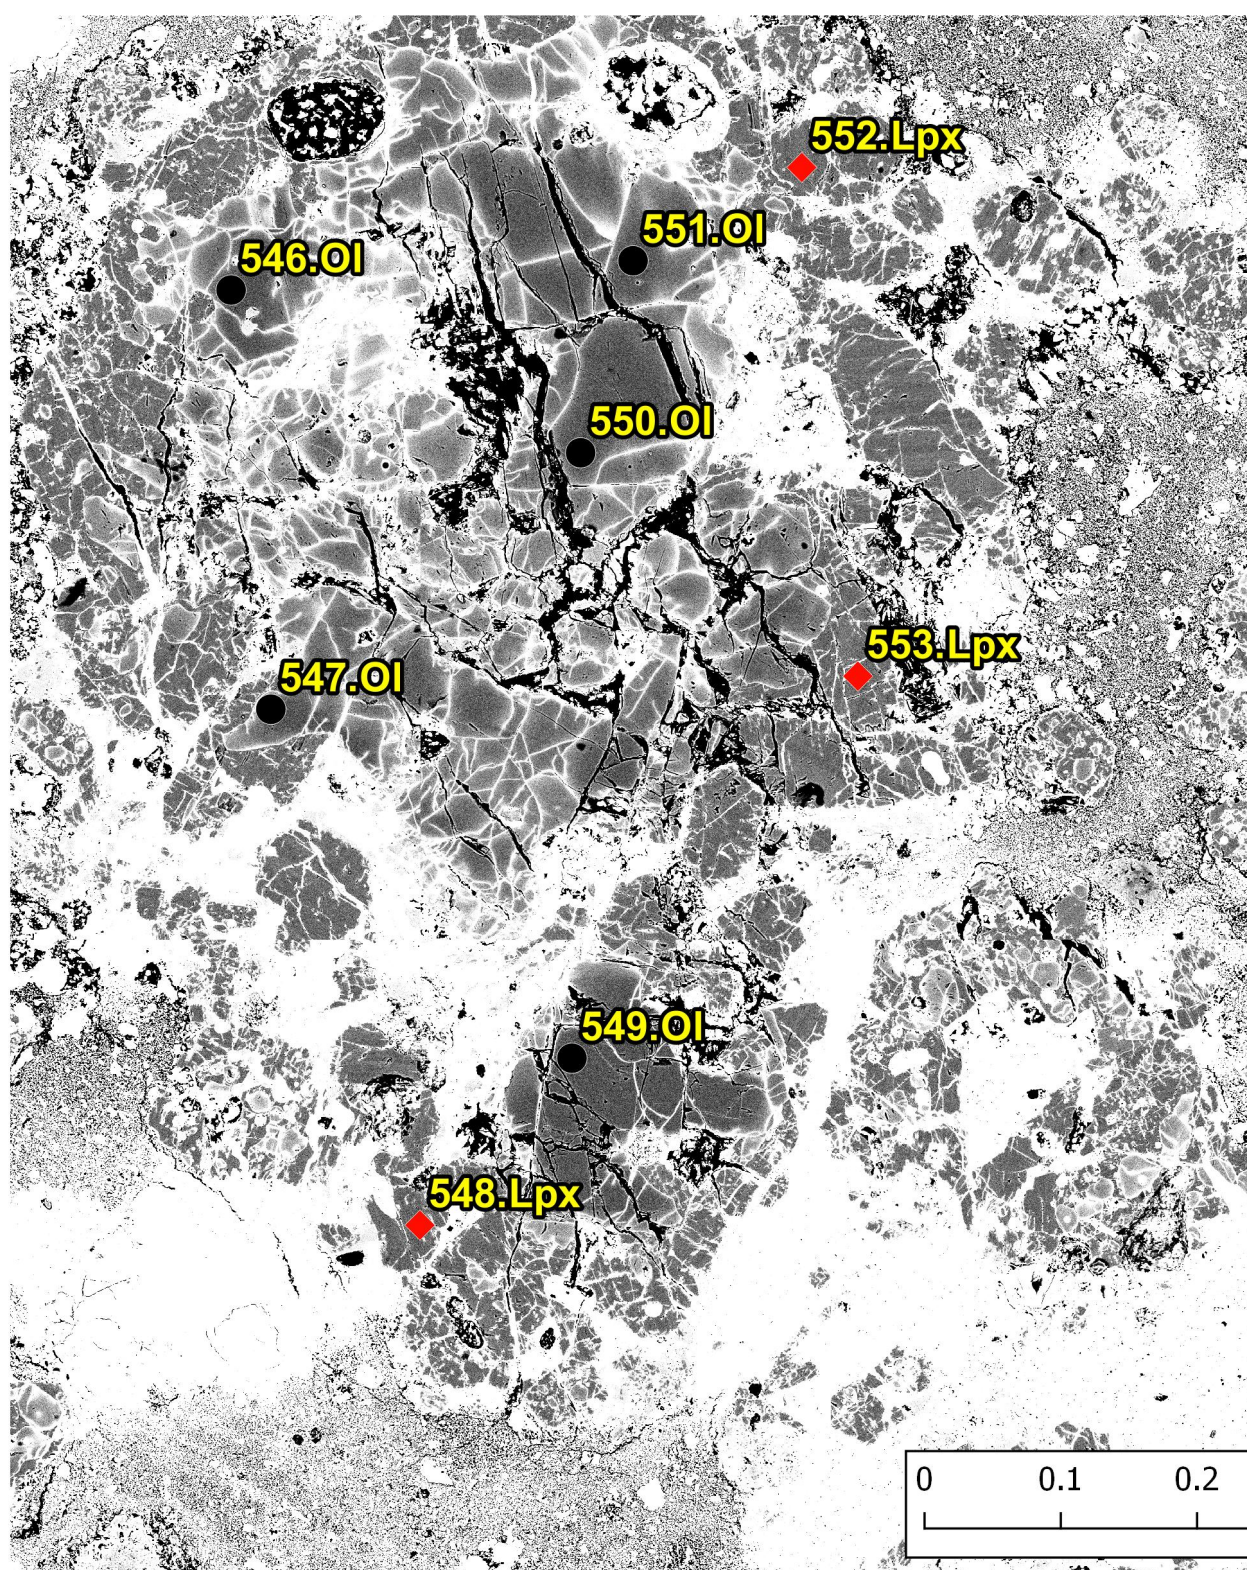

# N25

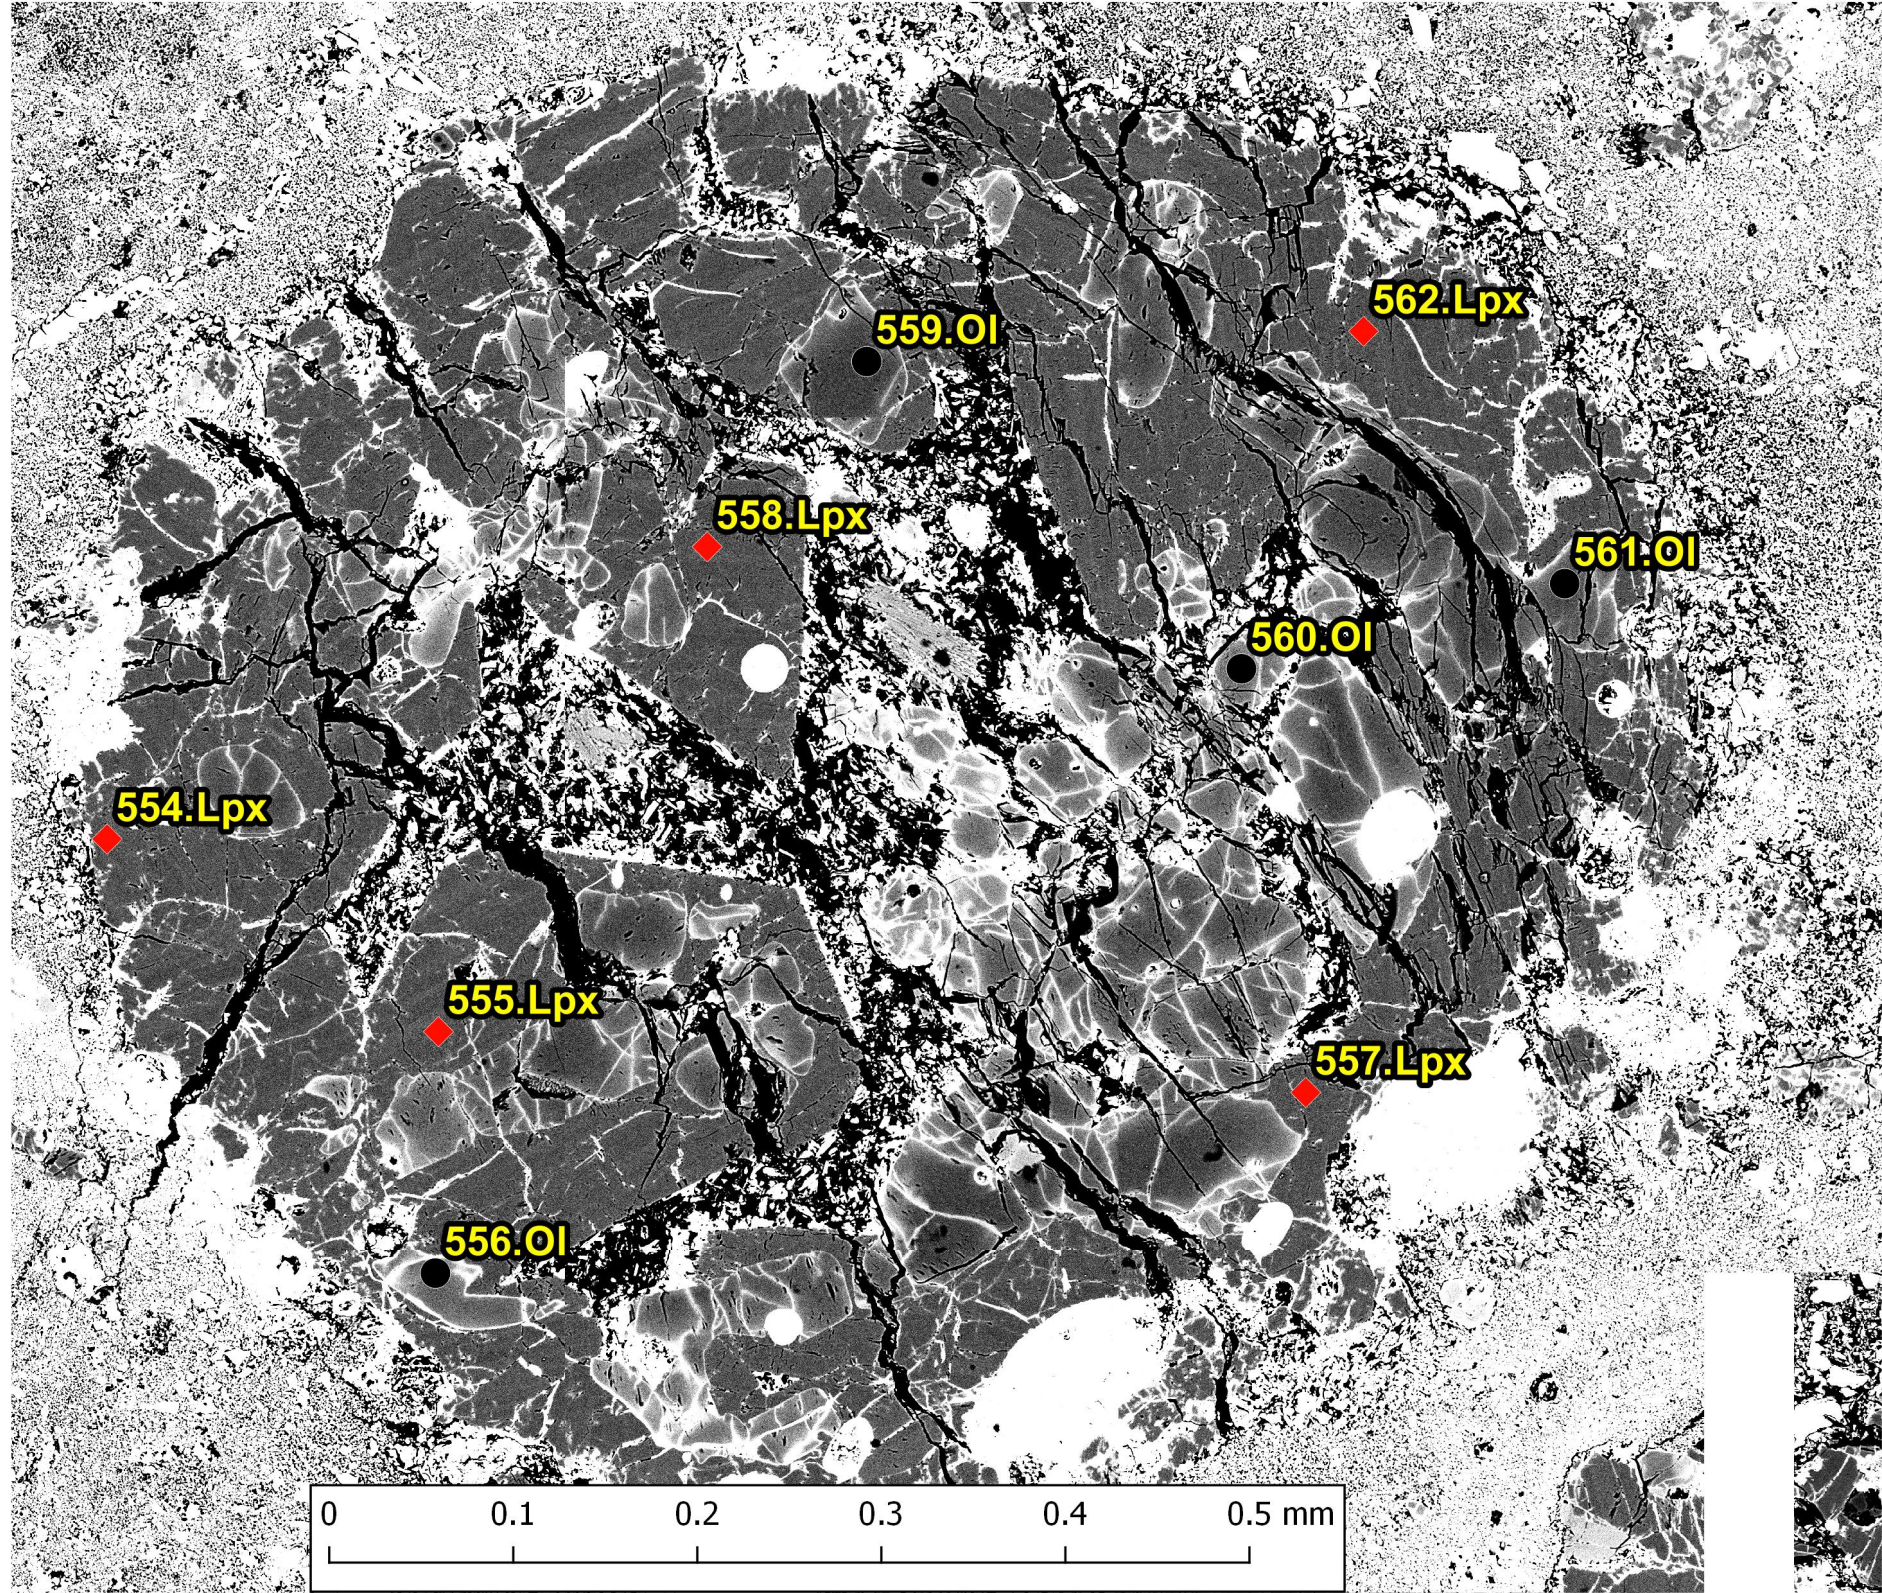

# N26

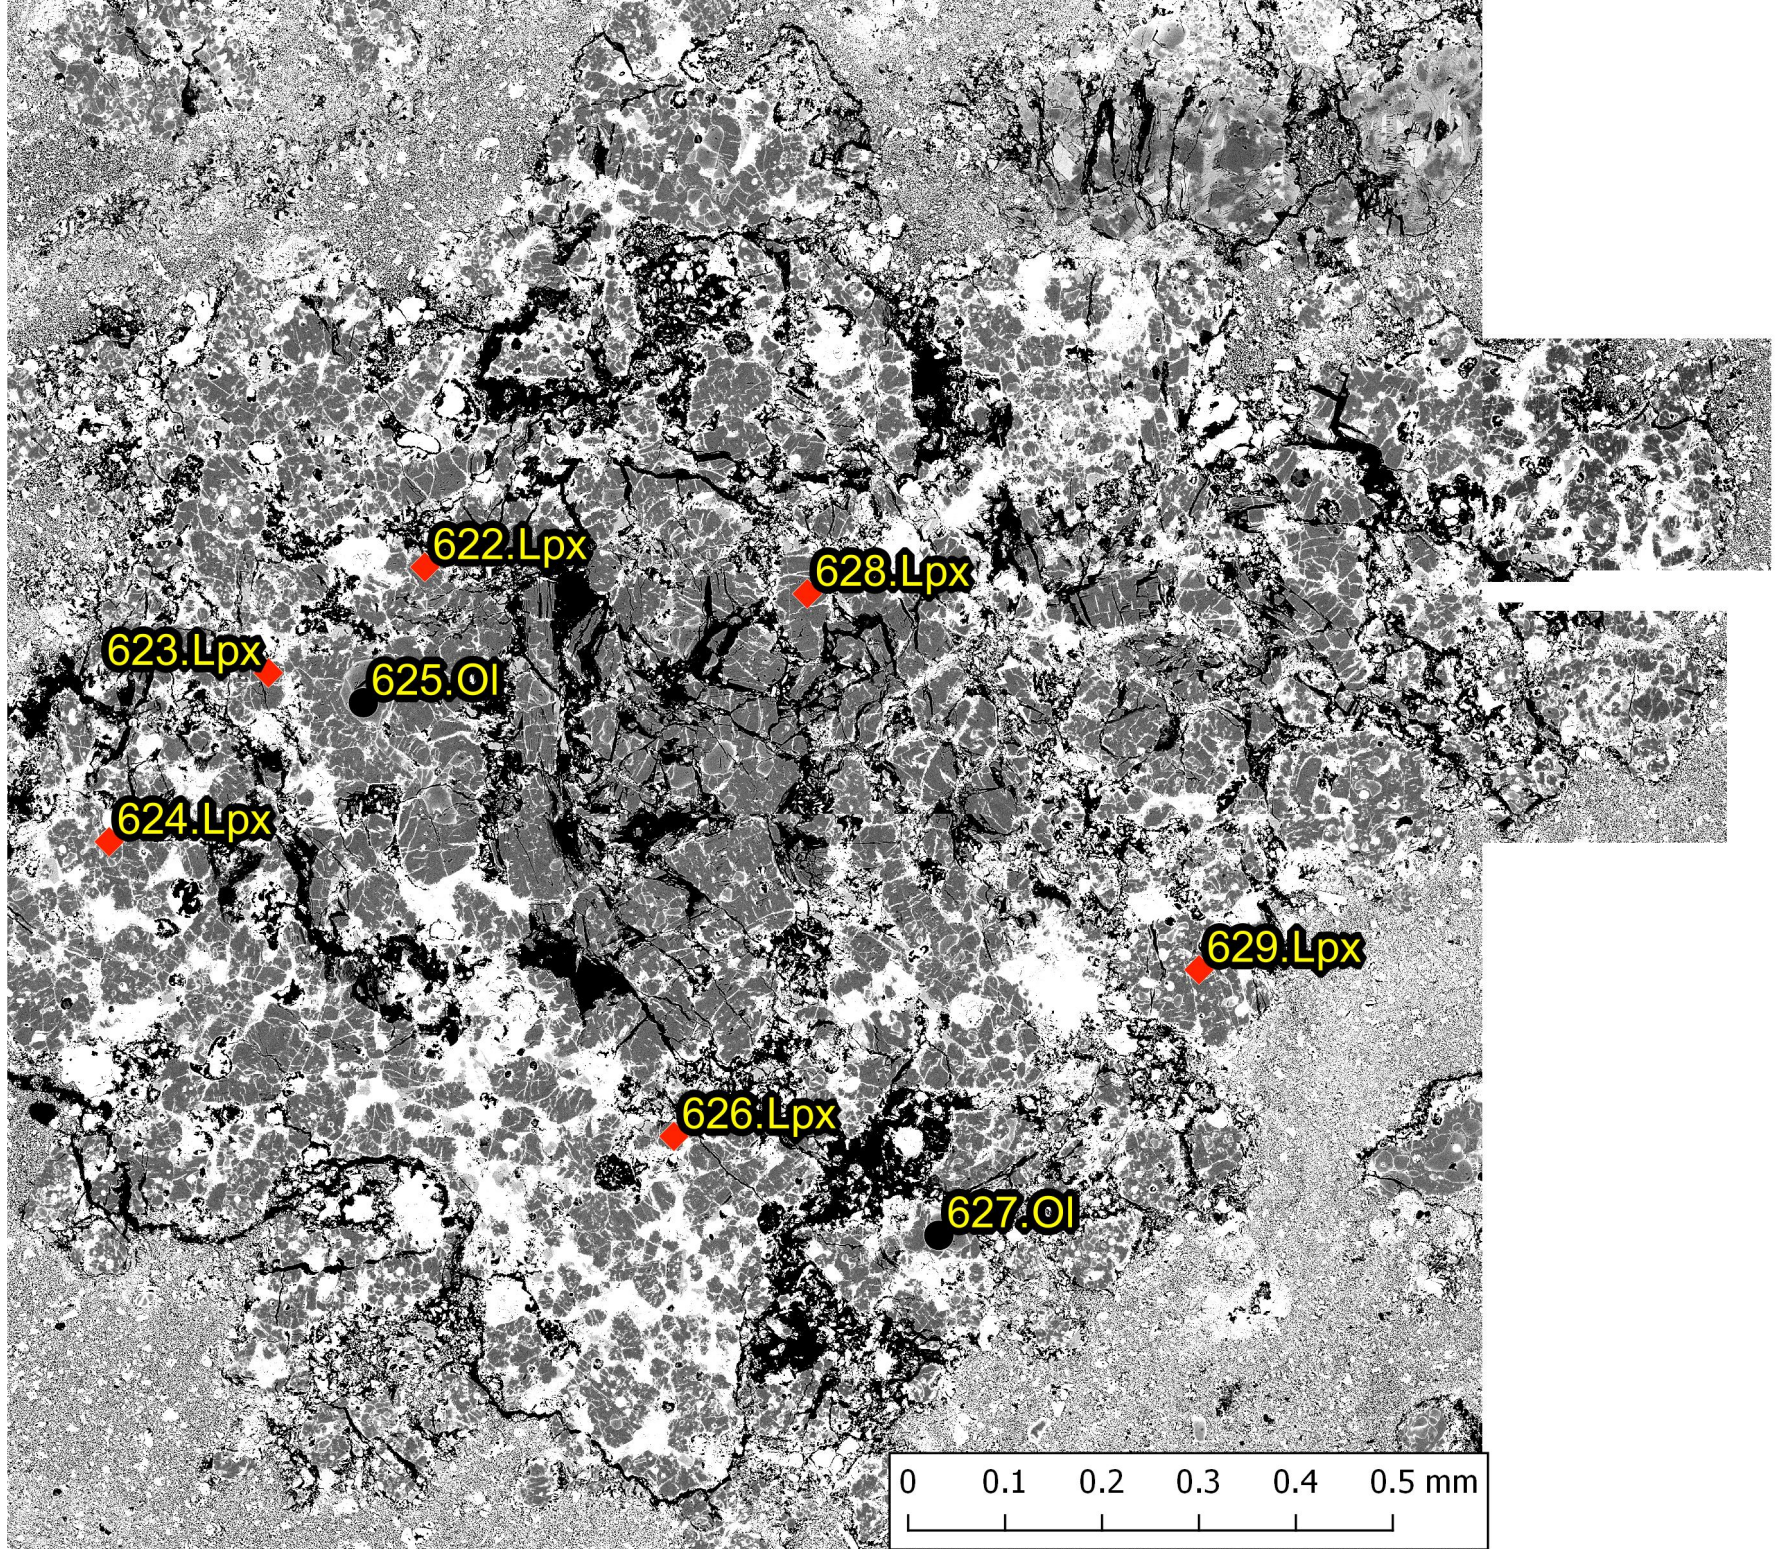

# N27

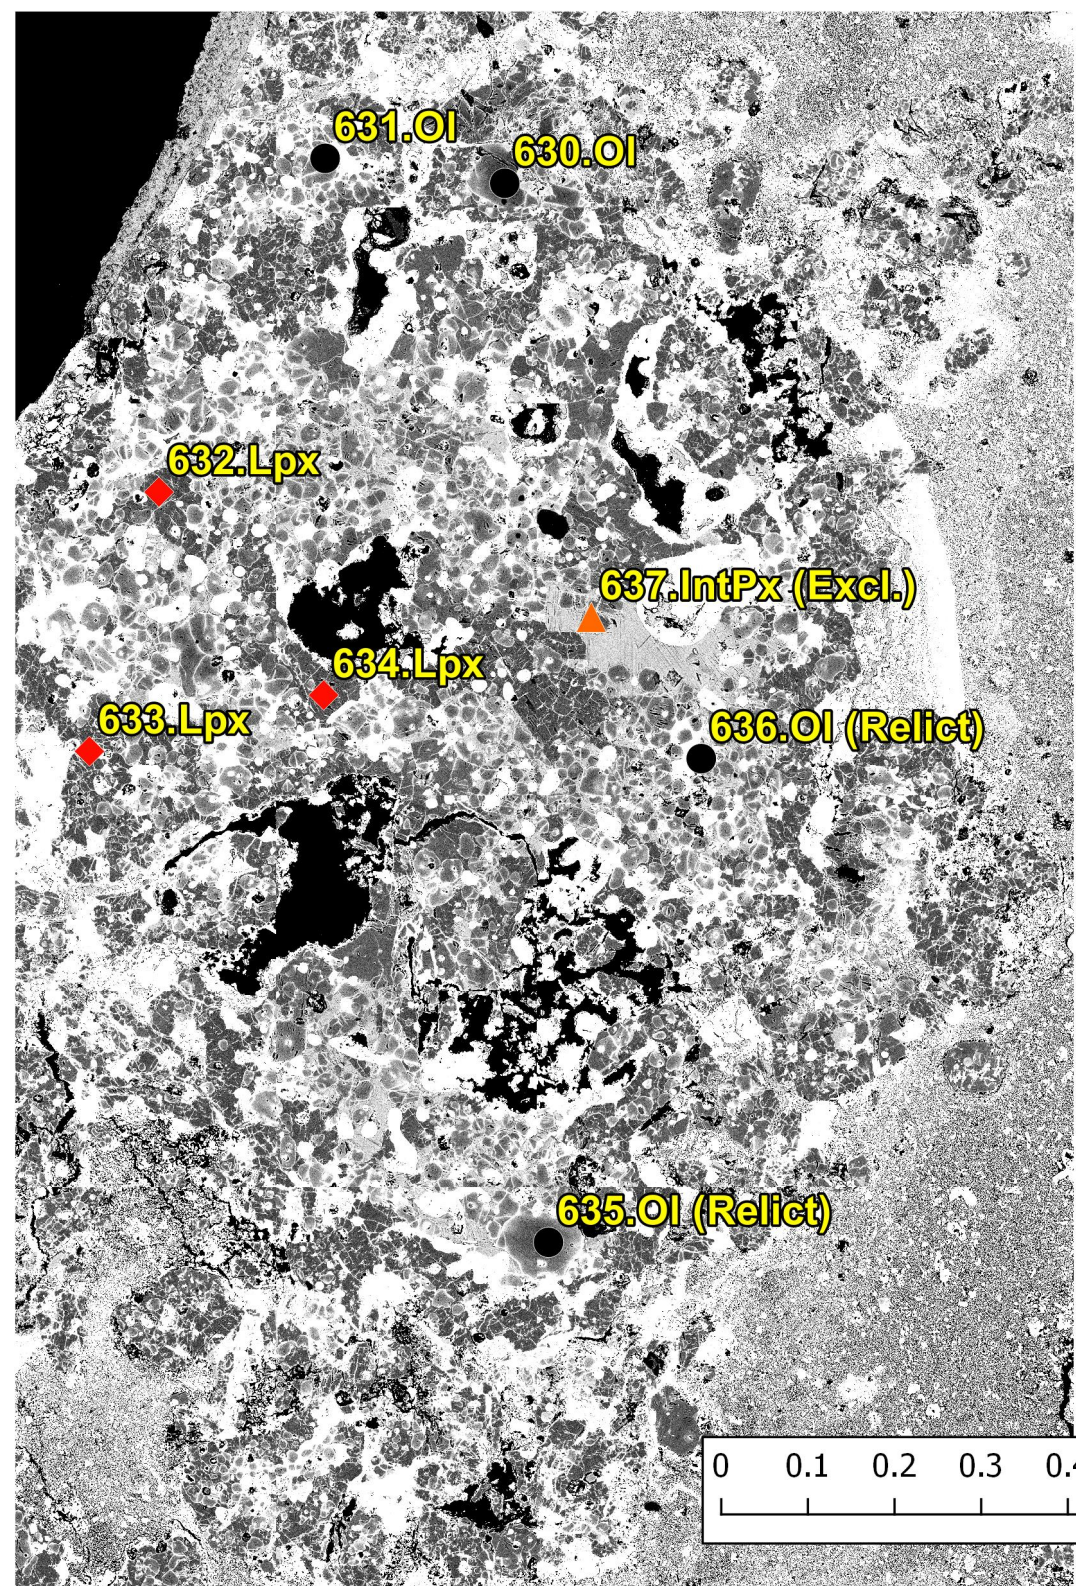

# N28

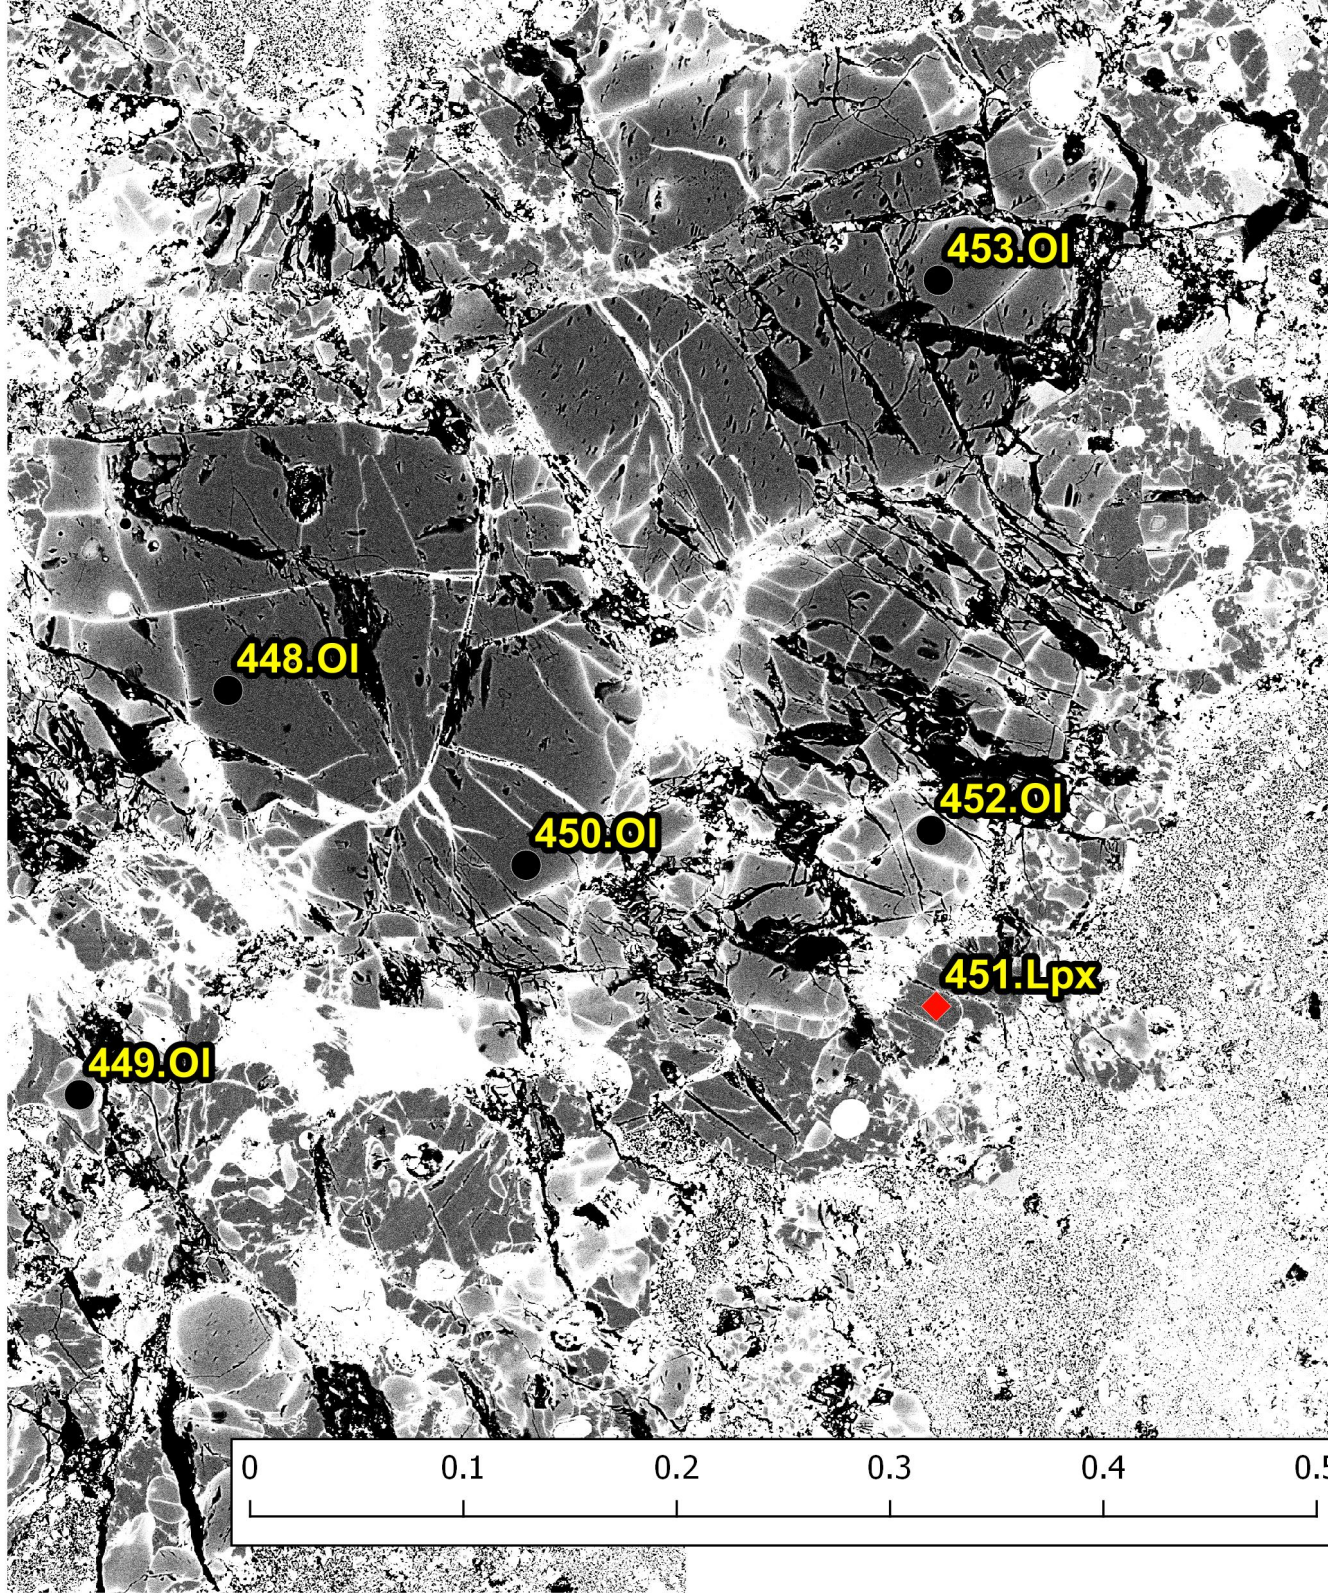

448.OI

453.OI

452.OI

450.OI

451.Lpx

449.OI

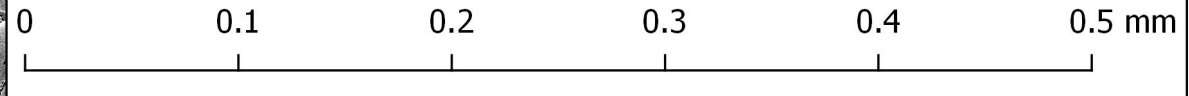

# N29

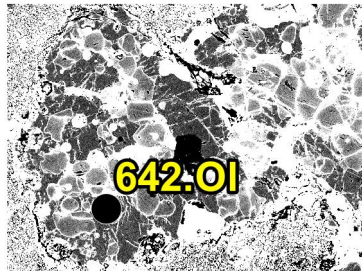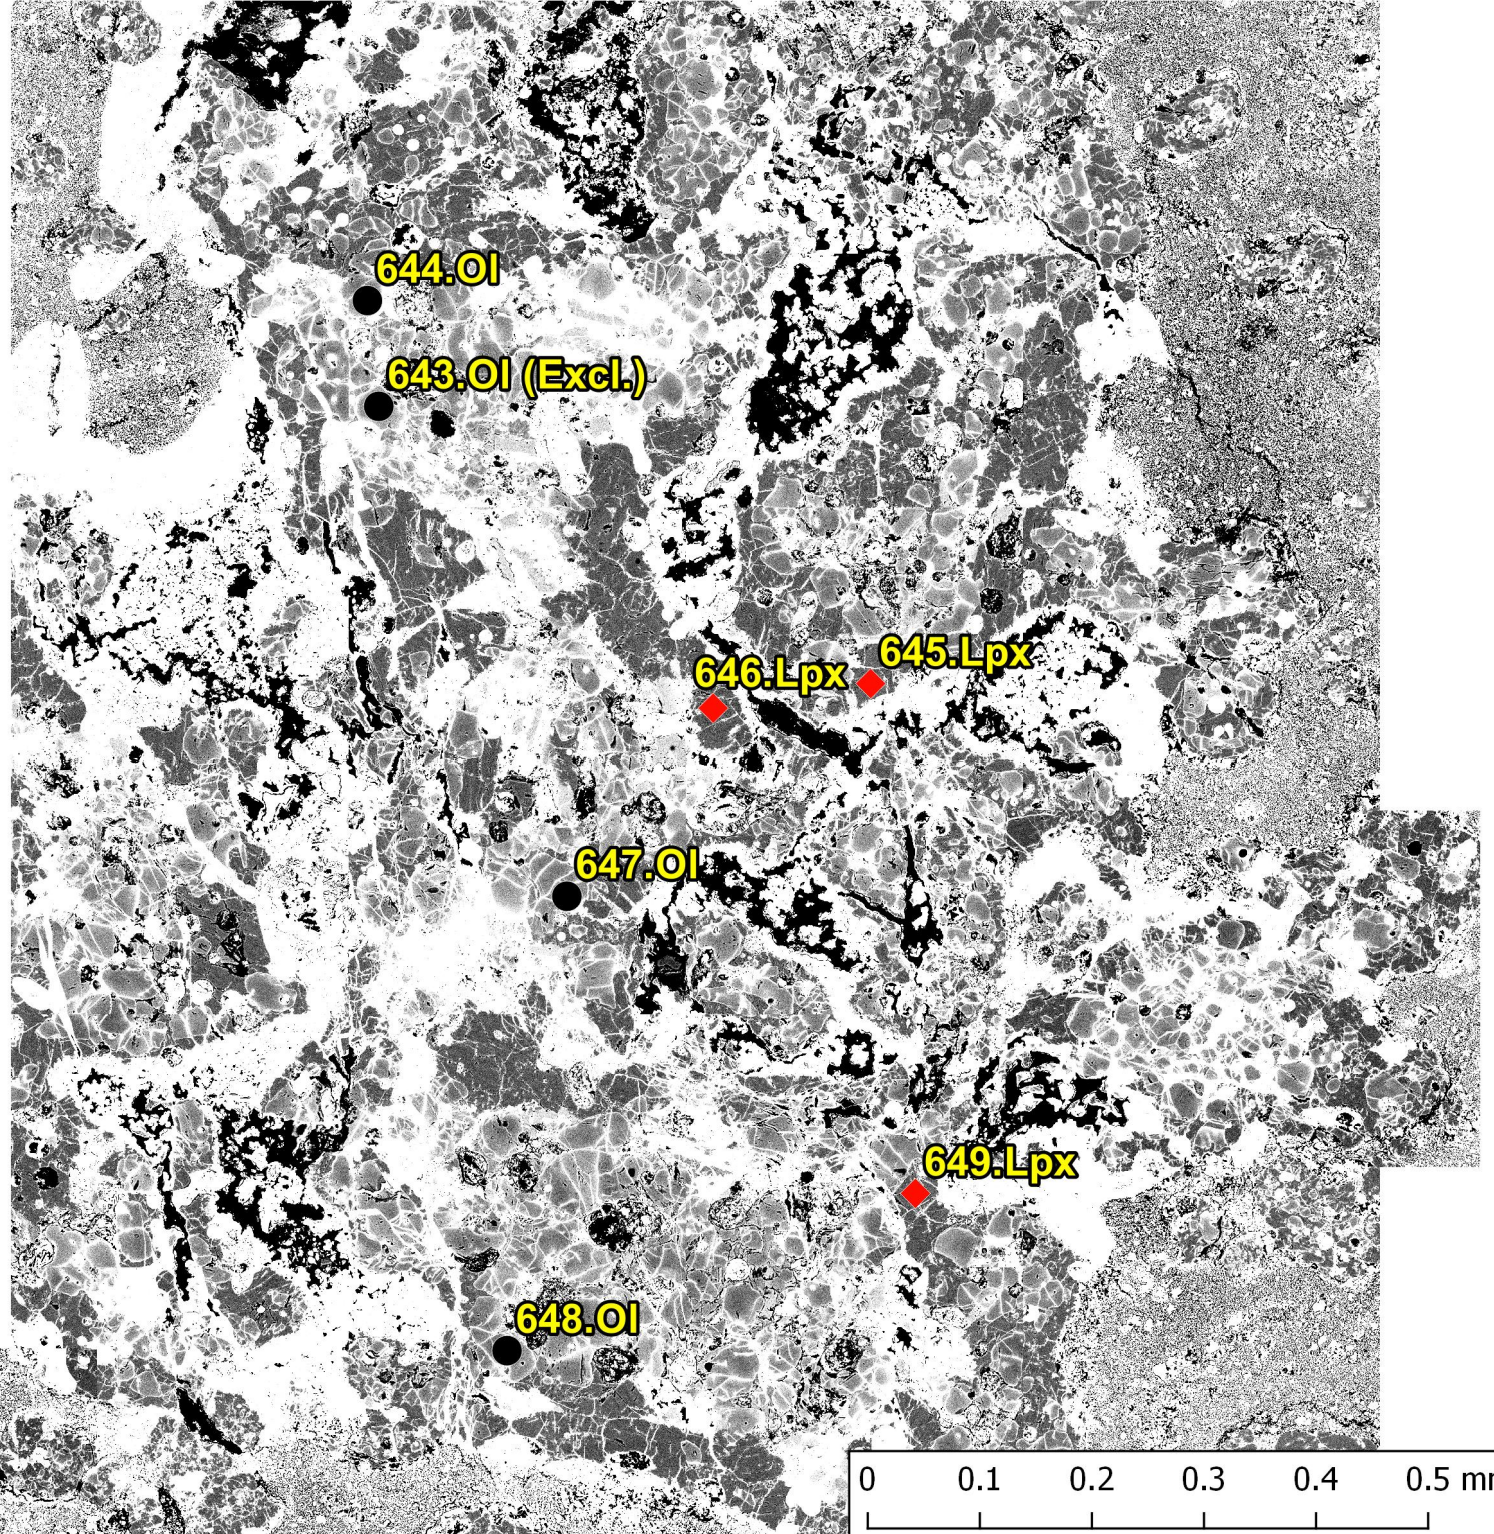

# N30

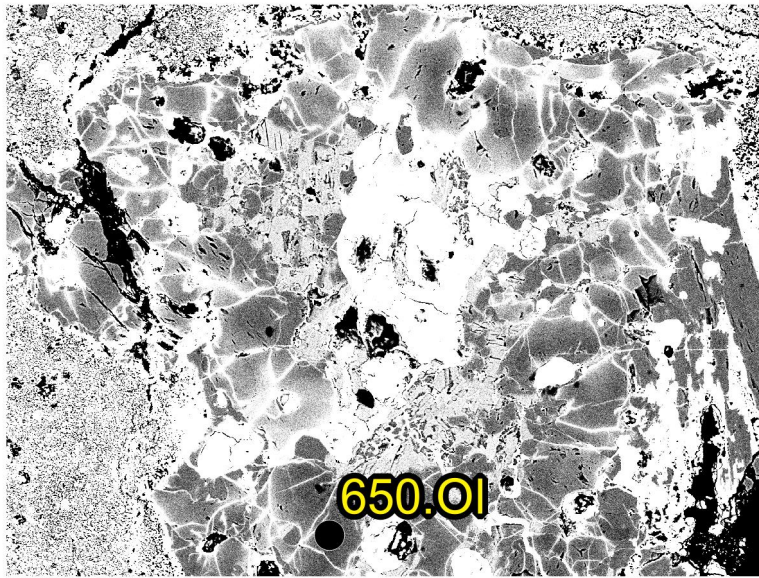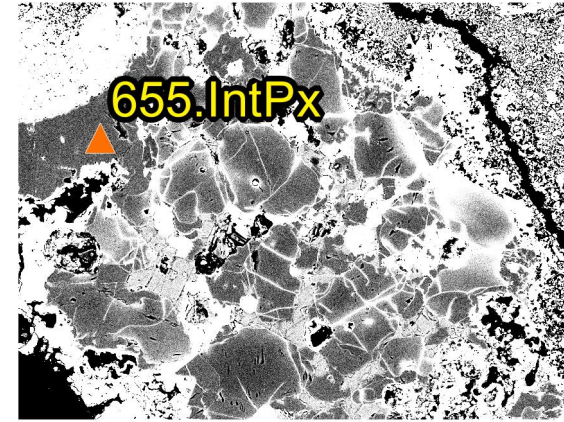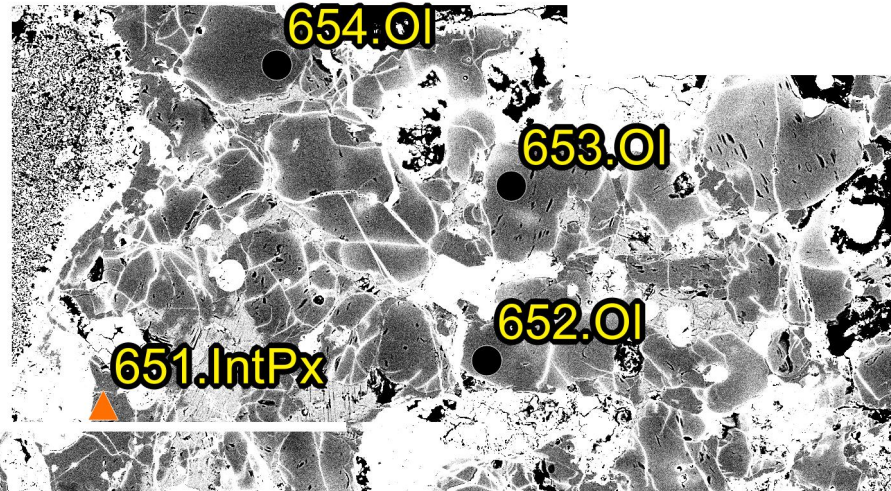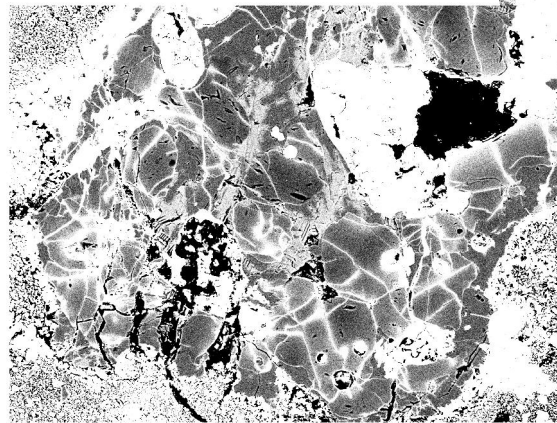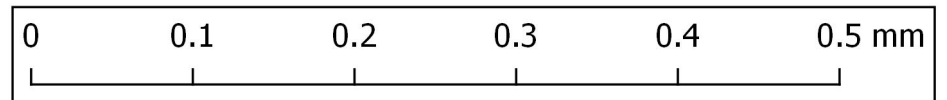



# N31

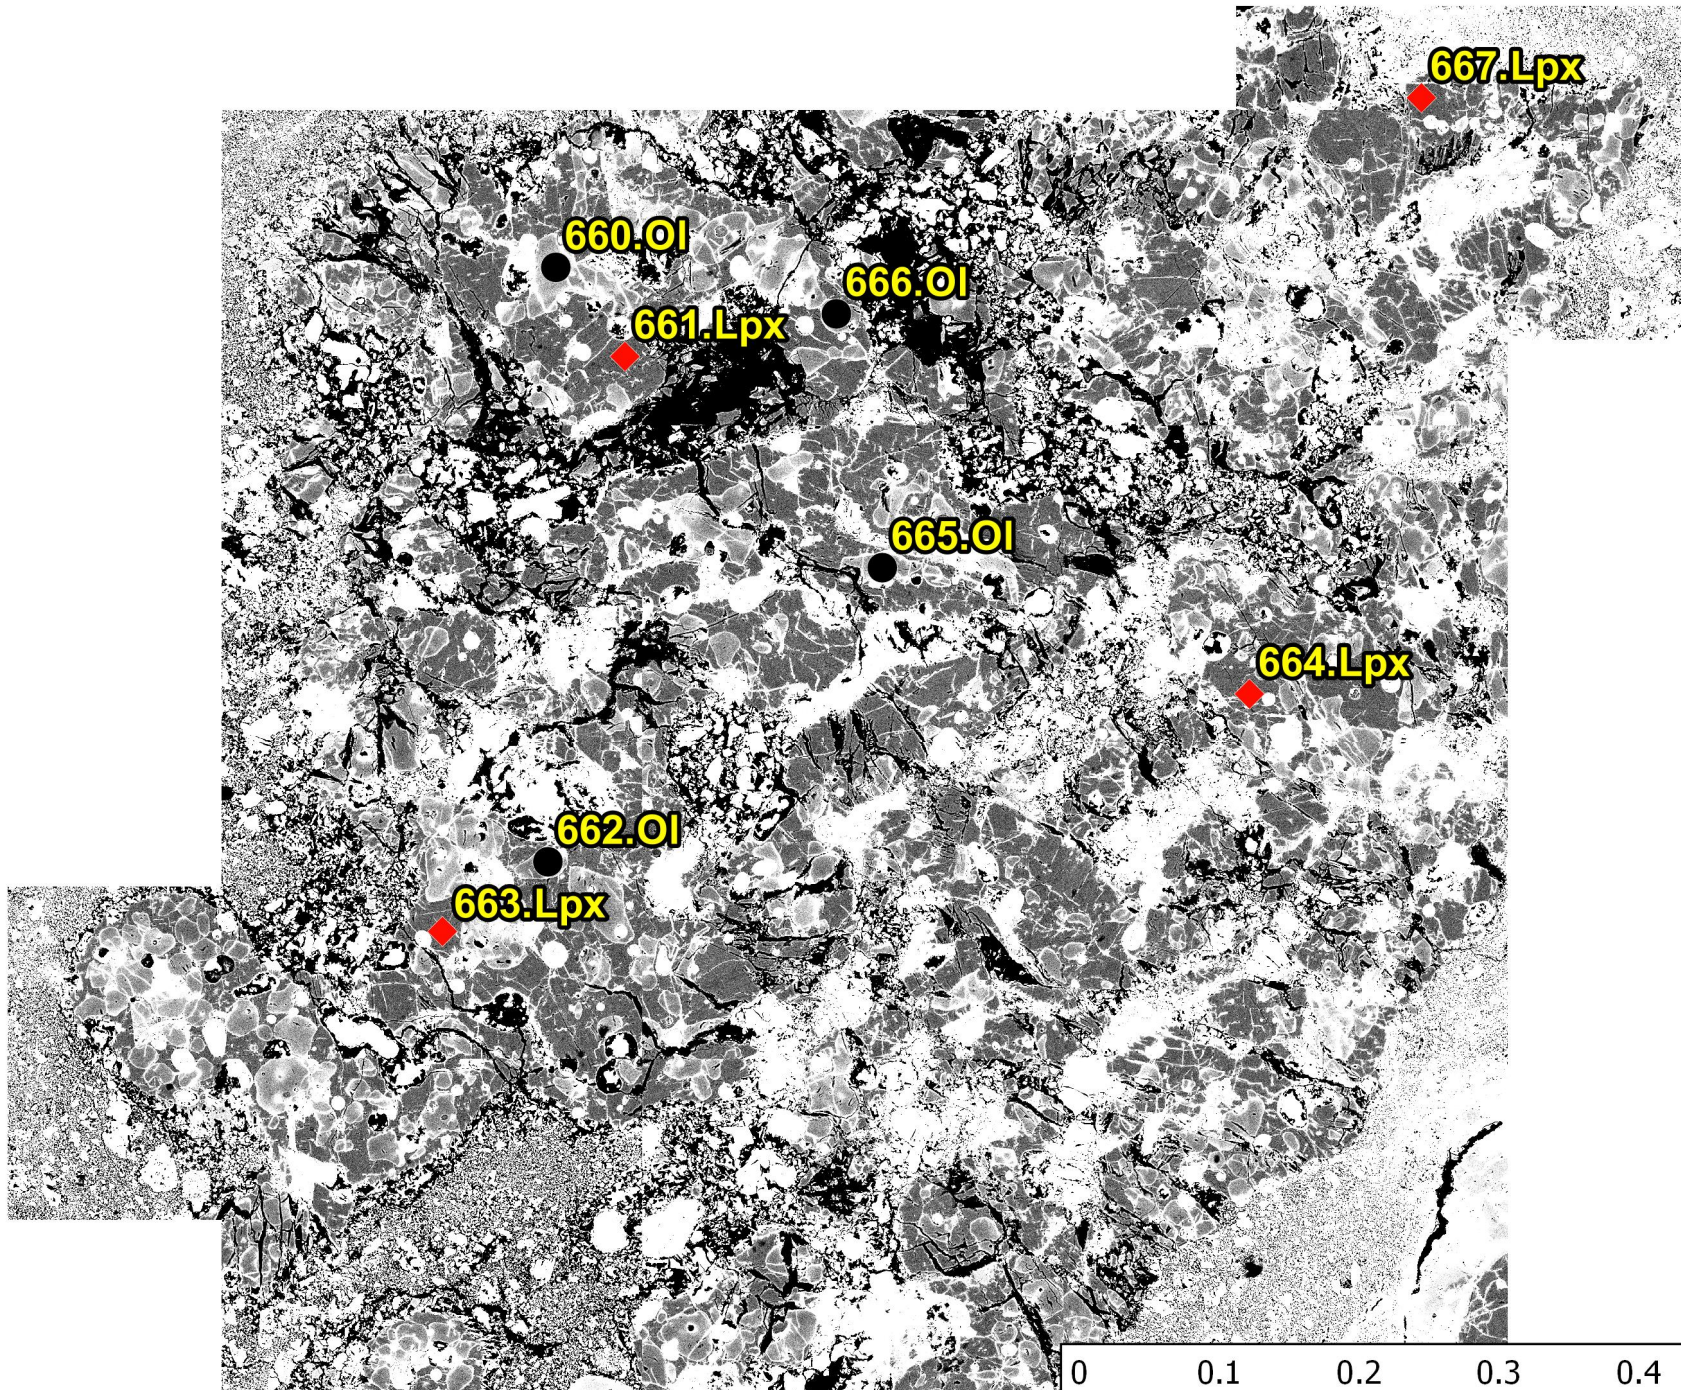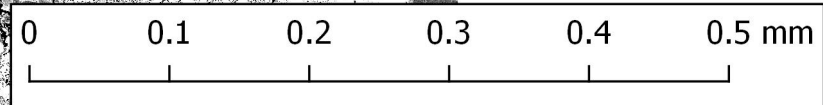

Supplement: NIHMS1567244-supplement-Sup2.pdf [file NIHMS1567244-supplement-Sup2.pdf]
