# Supplementary material
Source: PubMed Central journal article supplement (PMC7121232)

# Data S6

## Documentation of SIMS pits (olivine and pyroxene)

(for key to Remarks see Data S5, end of table)

| Ch#                   | Analysis              |                       |   | Remarks |
|-----------------------|-----------------------|-----------------------|---|---------|
| 1                     | N1: 184.Lpx           |                       |   |         |
| $\delta^{17}\text{O}$ | $\delta^{18}\text{O}$ | $\Delta^{17}\text{O}$ | ‰ |         |
| -4.22                 | -1.08                 | -3.66                 |   |         |

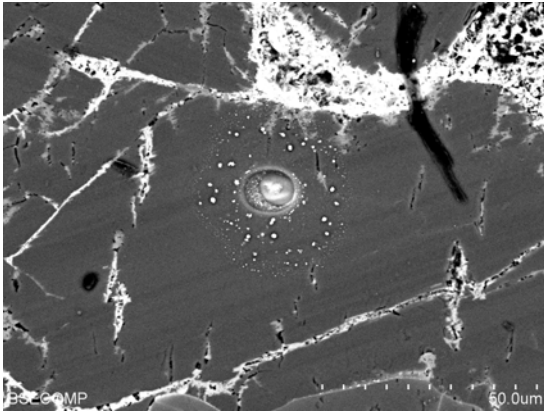

| Ch#                   | Analysis              |                       |   | Remarks |
|-----------------------|-----------------------|-----------------------|---|---------|
| 1                     | N1: 185.OI (Relict)   |                       |   |         |
| $\delta^{17}\text{O}$ | $\delta^{18}\text{O}$ | $\Delta^{17}\text{O}$ | ‰ |         |
| -8.73                 | -5.31                 | -5.97                 |   |         |

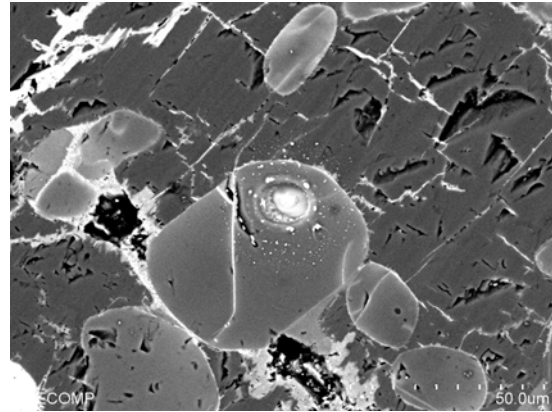

| Ch#                   | Analysis              |                       |   | Remarks |
|-----------------------|-----------------------|-----------------------|---|---------|
| 1                     | N1: 186.IntPx         |                       |   |         |
| $\delta^{17}\text{O}$ | $\delta^{18}\text{O}$ | $\Delta^{17}\text{O}$ | ‰ |         |
| -4.22                 | -0.91                 | -3.75                 |   |         |

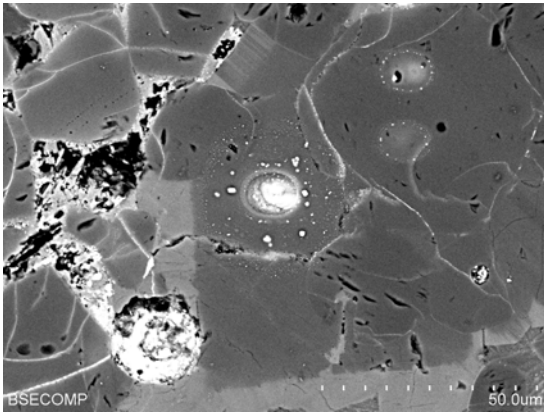

| Ch#                   | Analysis              |                       |   | Remarks |
|-----------------------|-----------------------|-----------------------|---|---------|
| 1                     | N1: 187.CaPx          |                       |   |         |
| $\delta^{17}\text{O}$ | $\delta^{18}\text{O}$ | $\Delta^{17}\text{O}$ | ‰ |         |
| -4.43                 | -1.57                 | -3.61                 |   |         |

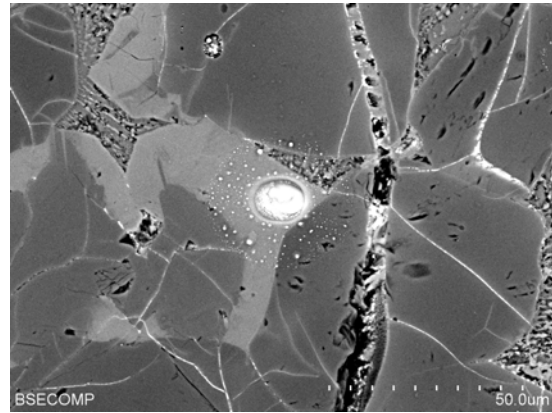

| Ch#                   | Analysis              |                       |   | Remarks |
|-----------------------|-----------------------|-----------------------|---|---------|
| 1                     | N1: 188.IntPx         |                       |   |         |
| $\delta^{17}\text{O}$ | $\delta^{18}\text{O}$ | $\Delta^{17}\text{O}$ | ‰ |         |
| -4.38                 | -1.04                 | -3.84                 |   |         |

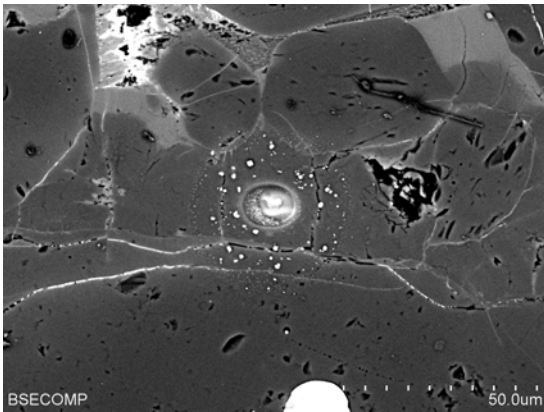

| Ch#                   | Analysis              |                       |   | Remarks |
|-----------------------|-----------------------|-----------------------|---|---------|
| 1                     | N1: 189.OI (Relict)   |                       |   |         |
| $\delta^{17}\text{O}$ | $\delta^{18}\text{O}$ | $\Delta^{17}\text{O}$ | ‰ |         |
| -6.20                 | -3.40                 | -4.43                 |   |         |

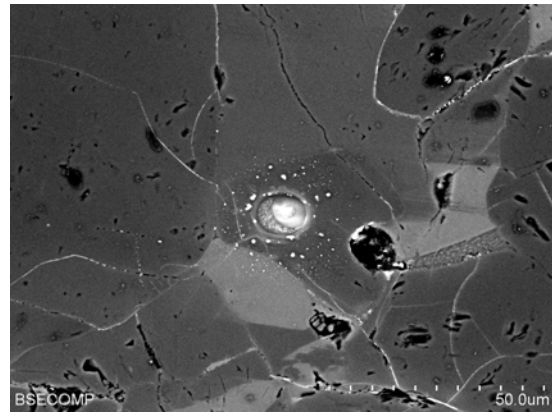

| Ch#                   | Analysis              |                       |   | Remarks |
|-----------------------|-----------------------|-----------------------|---|---------|
| 1                     | N1: 190.OI            |                       |   |         |
| $\delta^{17}\text{O}$ | $\delta^{18}\text{O}$ | $\Delta^{17}\text{O}$ | ‰ |         |
| -4.63                 | -0.95                 | -4.13                 |   |         |

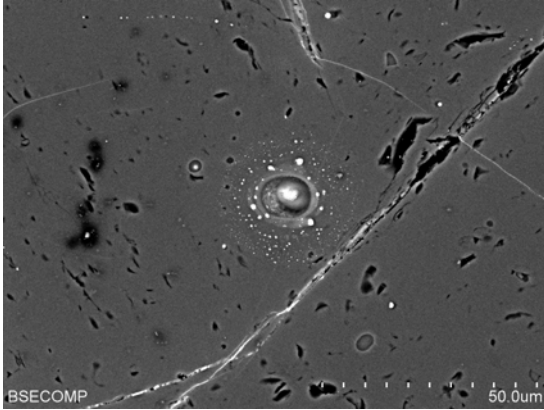

| Ch#                   | Analysis              |                       |   | Remarks |
|-----------------------|-----------------------|-----------------------|---|---------|
| 1                     | N1: 191.OI            |                       |   |         |
| $\delta^{17}\text{O}$ | $\delta^{18}\text{O}$ | $\Delta^{17}\text{O}$ | ‰ |         |
| -3.88                 | -0.82                 | -3.45                 |   |         |

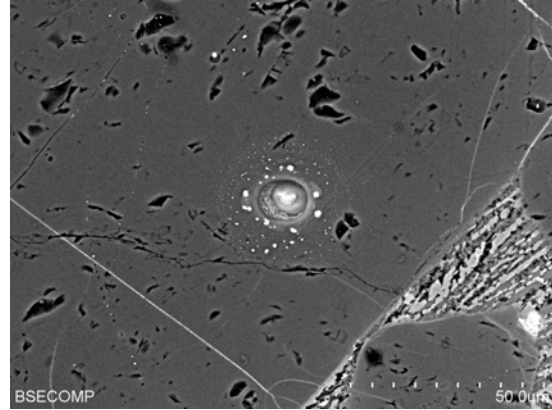

| Ch#                   | Analysis              |                       |   | Remarks |
|-----------------------|-----------------------|-----------------------|---|---------|
| 1                     | N1: 192.CaPx          |                       |   |         |
| $\delta^{17}\text{O}$ | $\delta^{18}\text{O}$ | $\Delta^{17}\text{O}$ | ‰ |         |
| -4.69                 | -1.32                 | -4.00                 |   |         |

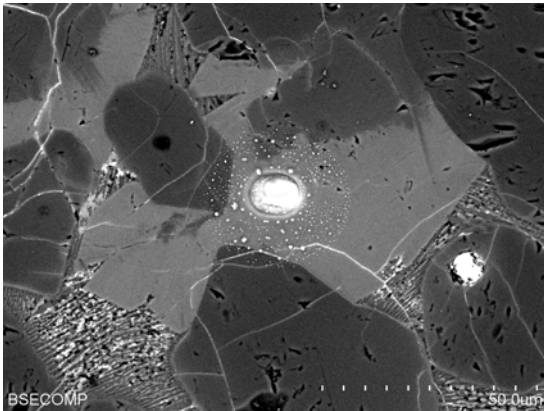

| Ch#                   | Analysis              |                       |   | Remarks |
|-----------------------|-----------------------|-----------------------|---|---------|
| 1                     | N1: 193.OI (Relict)   |                       |   |         |
| $\delta^{17}\text{O}$ | $\delta^{18}\text{O}$ | $\Delta^{17}\text{O}$ | ‰ |         |
| -5.10                 | -1.65                 | -4.24                 |   |         |

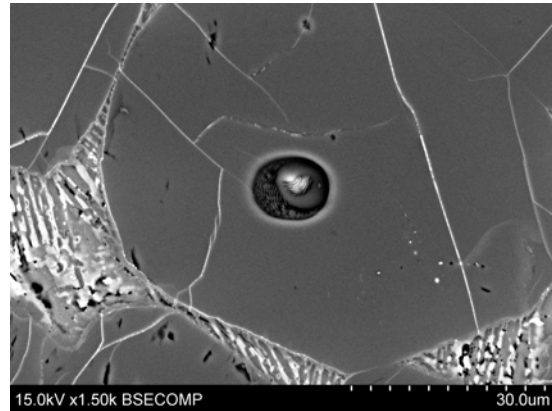

| Ch#                   | Analysis              |                       |   | Remarks |
|-----------------------|-----------------------|-----------------------|---|---------|
| 1                     | N1: 194.OI            |                       |   |         |
| $\delta^{17}\text{O}$ | $\delta^{18}\text{O}$ | $\Delta^{17}\text{O}$ | ‰ |         |
| -3.73                 | -0.53                 | -3.45                 |   |         |

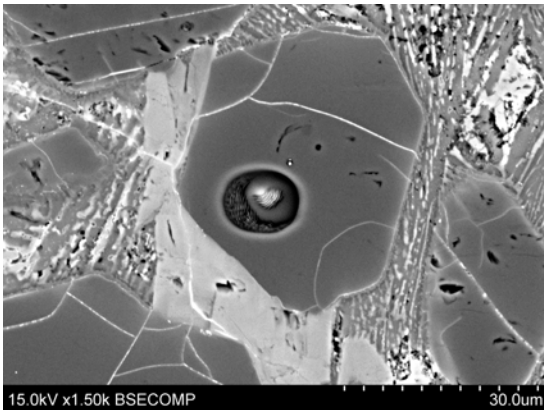

| Ch#                   | Analysis              |                       |   | Remarks |
|-----------------------|-----------------------|-----------------------|---|---------|
| 1                     | N1: 195.CaPx          |                       |   |         |
| $\delta^{17}\text{O}$ | $\delta^{18}\text{O}$ | $\Delta^{17}\text{O}$ | ‰ |         |
| -4.68                 | -1.46                 | -3.92                 |   |         |

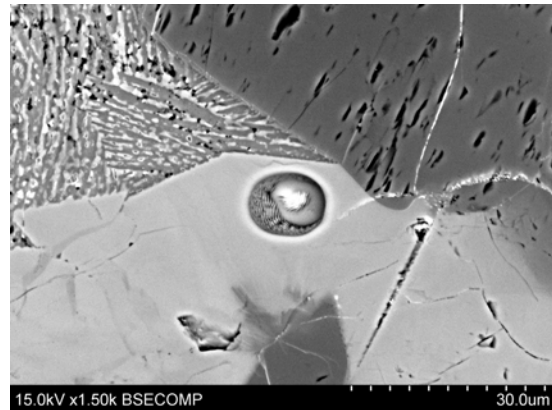

| Ch#                   | Analysis              |                       |   | Remarks |
|-----------------------|-----------------------|-----------------------|---|---------|
| 1                     | N1: 196.OI (Excl.)    |                       |   | P       |
| $\delta^{17}\text{O}$ | $\delta^{18}\text{O}$ | $\Delta^{17}\text{O}$ | ‰ |         |
| -4.82                 | -1.67                 | -3.95                 |   |         |

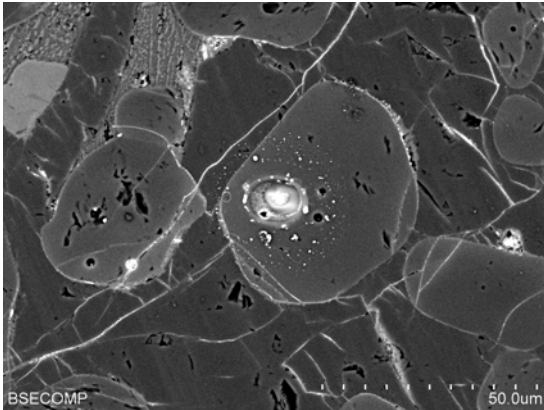

| Ch#                   | Analysis              |                       |   | Remarks |
|-----------------------|-----------------------|-----------------------|---|---------|
| 1                     | N1: 197.Lpx           |                       |   |         |
| $\delta^{17}\text{O}$ | $\delta^{18}\text{O}$ | $\Delta^{17}\text{O}$ | ‰ |         |
| -4.39                 | -0.83                 | -3.96                 |   |         |

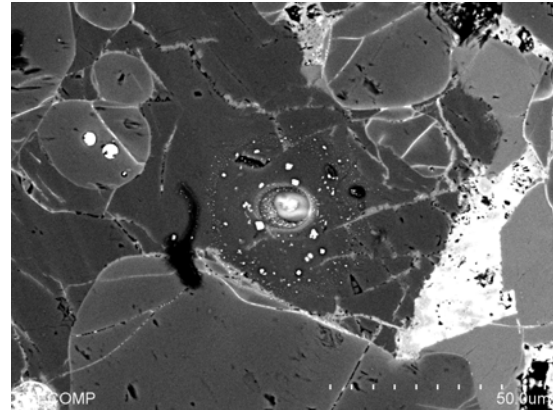

| Ch#                   | Analysis              |                       |   | Remarks |
|-----------------------|-----------------------|-----------------------|---|---------|
| 1                     | N1: 198.Lpx           |                       |   |         |
| $\delta^{17}\text{O}$ | $\delta^{18}\text{O}$ | $\Delta^{17}\text{O}$ | ‰ |         |
| -4.36                 | -1.14                 | -3.77                 |   |         |

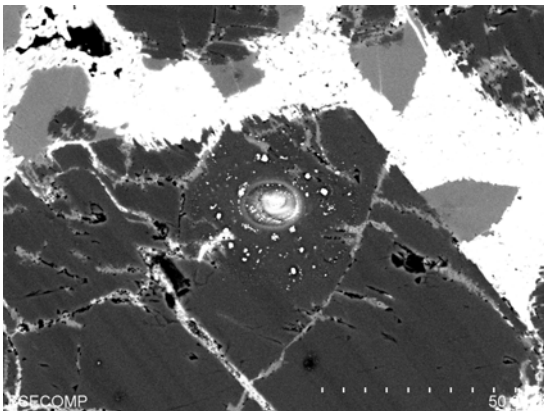

| Ch#                   | Analysis              |                       |   | Remarks |
|-----------------------|-----------------------|-----------------------|---|---------|
| 1                     | N1: 199.Lpx           |                       |   |         |
| $\delta^{17}\text{O}$ | $\delta^{18}\text{O}$ | $\Delta^{17}\text{O}$ | ‰ |         |
| -4.32                 | -0.96                 | -3.82                 |   |         |

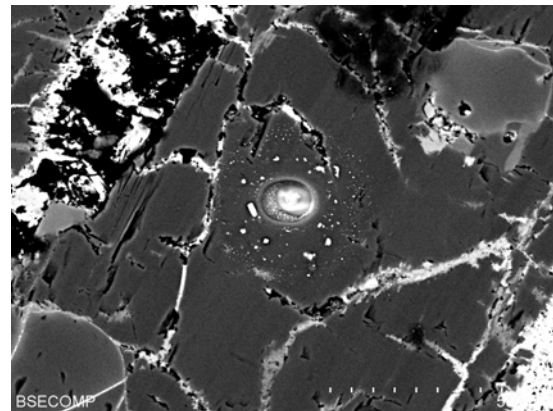

| Ch#                   | Analysis              |                       |   | Remarks |
|-----------------------|-----------------------|-----------------------|---|---------|
| 1                     | N1: 200.OI            |                       |   |         |
| $\delta^{17}\text{O}$ | $\delta^{18}\text{O}$ | $\Delta^{17}\text{O}$ | ‰ |         |
| -3.94                 | -0.85                 | -3.50                 |   |         |

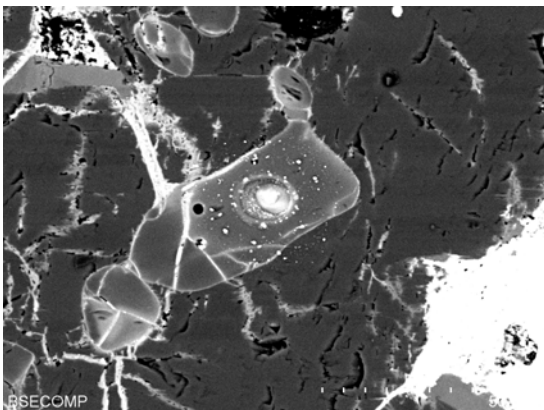

| Ch#                   | Analysis              |                       |   | Remarks |
|-----------------------|-----------------------|-----------------------|---|---------|
| 2                     | N2: 205.OI            |                       |   |         |
| $\delta^{17}\text{O}$ | $\delta^{18}\text{O}$ | $\Delta^{17}\text{O}$ | ‰ |         |
| -8.30                 | -5.41                 | -5.48                 |   |         |

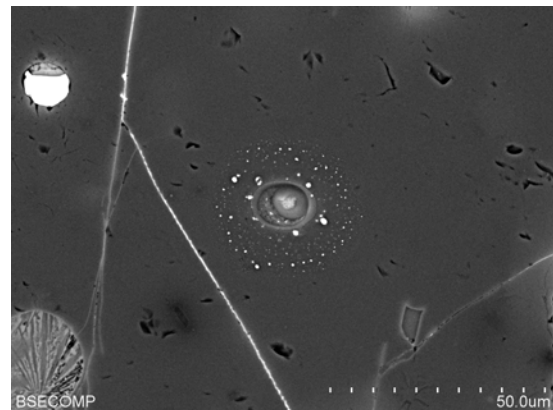

| Ch#                   | Analysis              |                       |   | Remarks |
|-----------------------|-----------------------|-----------------------|---|---------|
| <b>2</b>              | N2: 206.Lpx           |                       |   |         |
| $\delta^{17}\text{O}$ | $\delta^{18}\text{O}$ | $\Delta^{17}\text{O}$ | ‰ |         |
| -8.11                 | -5.59                 | -5.20                 |   |         |

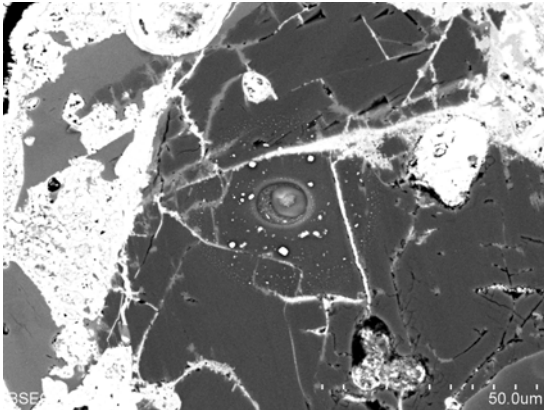

| Ch#                   | Analysis              |                       |   | Remarks |
|-----------------------|-----------------------|-----------------------|---|---------|
| <b>2</b>              | N2: 207.Lpx           |                       |   |         |
| $\delta^{17}\text{O}$ | $\delta^{18}\text{O}$ | $\Delta^{17}\text{O}$ | ‰ |         |
| -8.19                 | -5.55                 | -5.31                 |   |         |

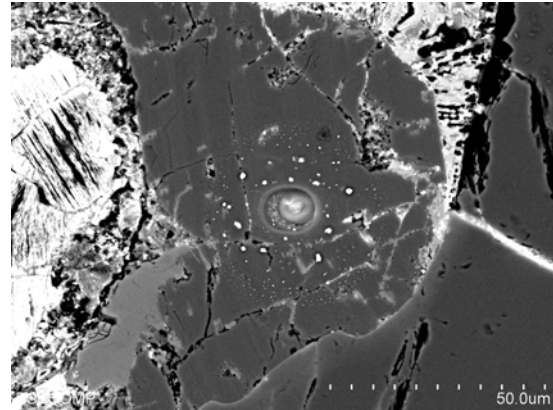

| Ch#                   | Analysis                |                       |   | Remarks |
|-----------------------|-------------------------|-----------------------|---|---------|
| <b>2</b>              | N2: 208.CaPx (Excl.) TP |                       |   |         |
| $\delta^{17}\text{O}$ | $\delta^{18}\text{O}$   | $\Delta^{17}\text{O}$ | ‰ |         |
| -5.64                 | -4.50                   | -3.31                 |   |         |

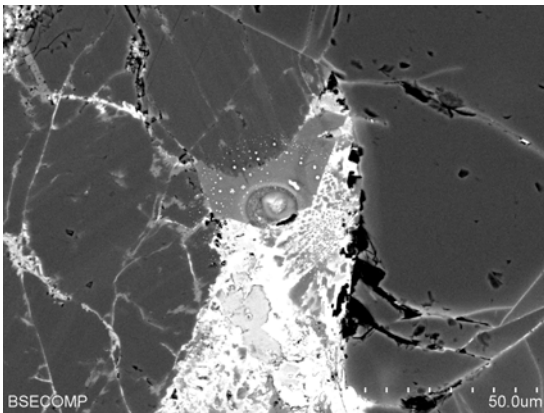

| Ch#                   | Analysis              |                       |   | Remarks |
|-----------------------|-----------------------|-----------------------|---|---------|
| <b>2</b>              | N2: 209.OI            |                       |   |         |
| $\delta^{17}\text{O}$ | $\delta^{18}\text{O}$ | $\Delta^{17}\text{O}$ | ‰ |         |
| -8.44                 | -5.33                 | -5.67                 |   |         |

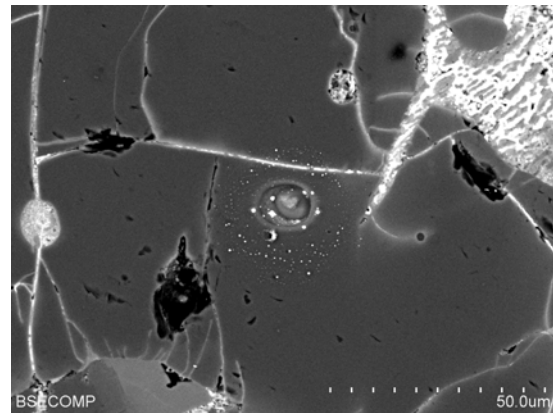

| Ch#                   | Analysis              |                       |   | Remarks |
|-----------------------|-----------------------|-----------------------|---|---------|
| <b>2</b>              | N2: 210.CaPx          |                       |   |         |
| $\delta^{17}\text{O}$ | $\delta^{18}\text{O}$ | $\Delta^{17}\text{O}$ | ‰ |         |
| -8.48                 | -5.82                 | -5.46                 |   |         |

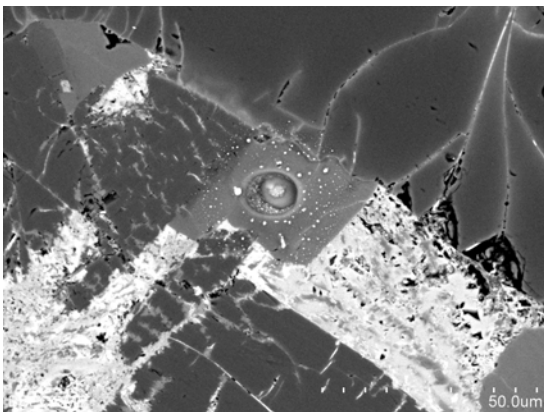

| Ch#                   | Analysis              |                       |   | Remarks |
|-----------------------|-----------------------|-----------------------|---|---------|
| <b>2</b>              | N2: 211.OI            |                       |   |         |
| $\delta^{17}\text{O}$ | $\delta^{18}\text{O}$ | $\Delta^{17}\text{O}$ | ‰ |         |
| -8.40                 | -5.32                 | -5.64                 |   |         |

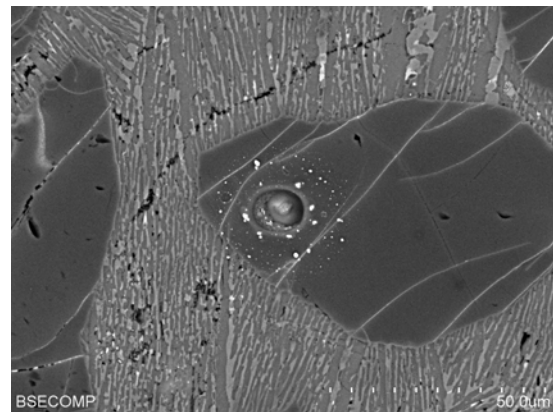

| Ch#                   | Analysis              |                       |   | Remarks |
|-----------------------|-----------------------|-----------------------|---|---------|
| <b>2</b>              | N2: 212.OI            |                       |   |         |
| $\delta^{17}\text{O}$ | $\delta^{18}\text{O}$ | $\Delta^{17}\text{O}$ | ‰ |         |
| -8.21                 | -5.29                 | -5.46                 |   |         |

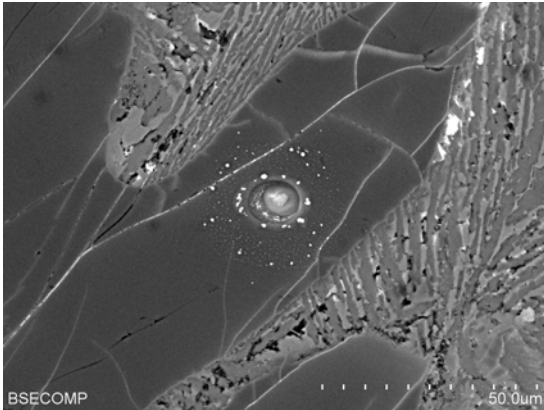

| Ch#                   | Analysis               |                       |   | Remarks |
|-----------------------|------------------------|-----------------------|---|---------|
| <b>2</b>              | N2: 213.CaPx (Excl.) U |                       |   |         |
| $\delta^{17}\text{O}$ | $\delta^{18}\text{O}$  | $\Delta^{17}\text{O}$ | ‰ |         |
| -6.80                 | -2.31                  | -5.60                 |   |         |

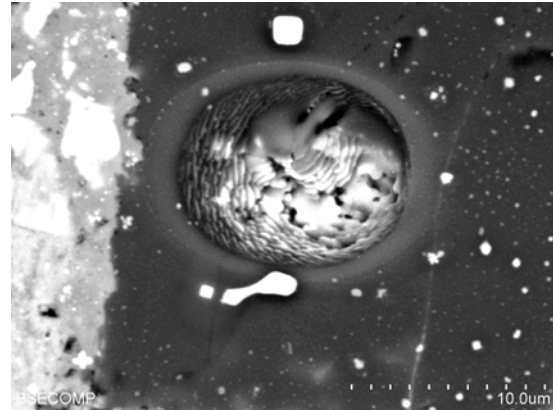

| Ch#                   | Analysis              |                       |   | Remarks |
|-----------------------|-----------------------|-----------------------|---|---------|
| <b>2</b>              | N2: 214.Lpx           |                       |   |         |
| $\delta^{17}\text{O}$ | $\delta^{18}\text{O}$ | $\Delta^{17}\text{O}$ | ‰ |         |
| -8.05                 | -5.46                 | -5.21                 |   |         |

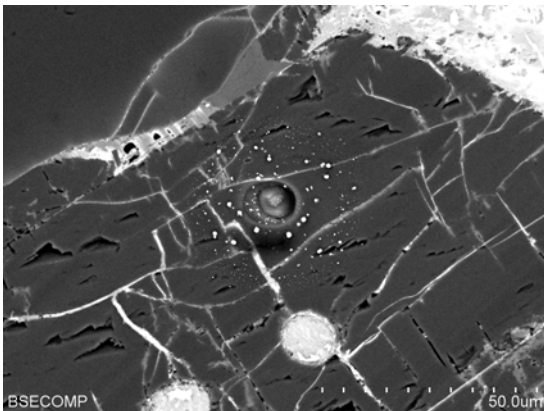

| Ch#                   | Analysis              |                       |   | Remarks |
|-----------------------|-----------------------|-----------------------|---|---------|
| <b>3</b>              | N3: 225.Lpx           |                       |   |         |
| $\delta^{17}\text{O}$ | $\delta^{18}\text{O}$ | $\Delta^{17}\text{O}$ | ‰ |         |
| -6.49                 | -3.19                 | -4.83                 |   |         |

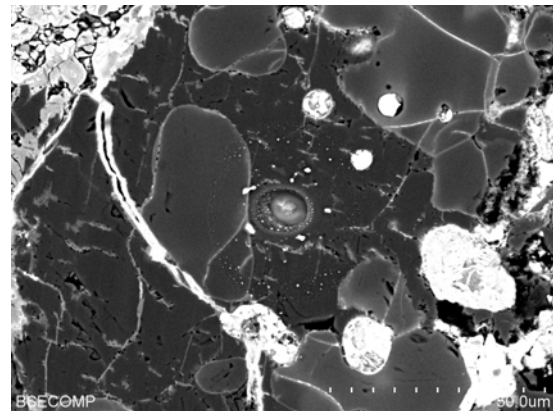

| Ch#                   | Analysis              |                       |   | Remarks |
|-----------------------|-----------------------|-----------------------|---|---------|
| <b>3</b>              | N3: 226.OI            |                       |   |         |
| $\delta^{17}\text{O}$ | $\delta^{18}\text{O}$ | $\Delta^{17}\text{O}$ | ‰ |         |
| -6.53                 | -3.15                 | -4.89                 |   |         |

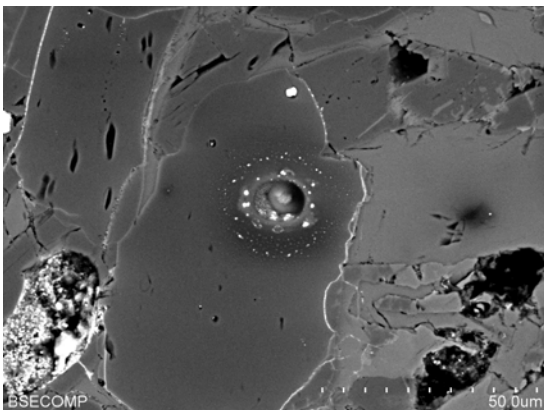

| Ch#                   | Analysis              |                       |   | Remarks |
|-----------------------|-----------------------|-----------------------|---|---------|
| <b>3</b>              | N3: 227.OI            |                       |   |         |
| $\delta^{17}\text{O}$ | $\delta^{18}\text{O}$ | $\Delta^{17}\text{O}$ | ‰ |         |
| -6.55                 | -3.29                 | -4.84                 |   |         |

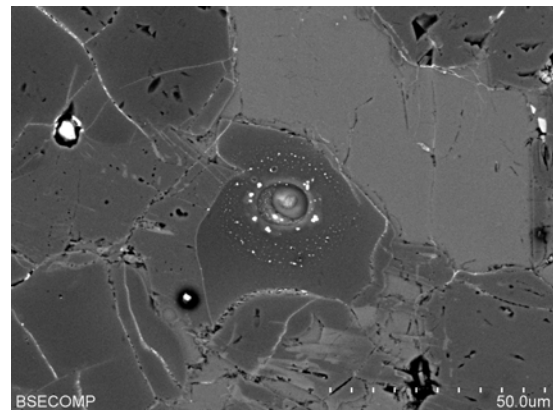

| Ch#                   | Analysis              |                       |   | Remarks |
|-----------------------|-----------------------|-----------------------|---|---------|
| <b>3</b>              | N3: 228.OI            |                       |   |         |
| $\delta^{17}\text{O}$ | $\delta^{18}\text{O}$ | $\Delta^{17}\text{O}$ | ‰ |         |
| -6.40                 | -3.15                 | -4.76                 |   |         |

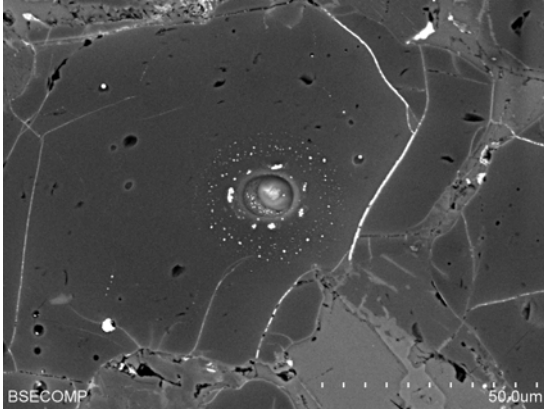

| Ch#                   | Analysis              |                       |   | Remarks |
|-----------------------|-----------------------|-----------------------|---|---------|
| <b>3</b>              | N3: 229.IntPx         |                       |   |         |
| $\delta^{17}\text{O}$ | $\delta^{18}\text{O}$ | $\Delta^{17}\text{O}$ | ‰ |         |
| -6.71                 | -3.59                 | -4.85                 |   |         |

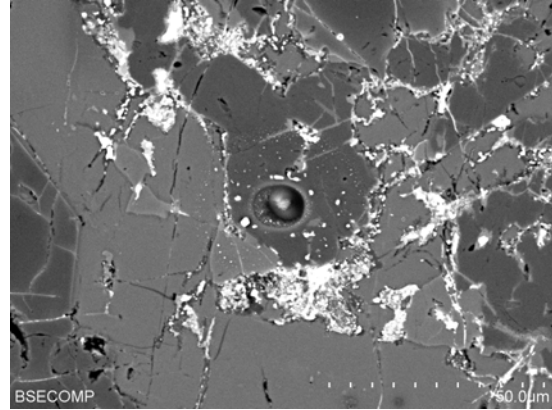

| Ch#                   | Analysis              |                       |   | Remarks |
|-----------------------|-----------------------|-----------------------|---|---------|
| <b>3</b>              | N3: 230.Lpx           |                       |   |         |
| $\delta^{17}\text{O}$ | $\delta^{18}\text{O}$ | $\Delta^{17}\text{O}$ | ‰ |         |
| -6.90                 | -3.48                 | -5.09                 |   |         |

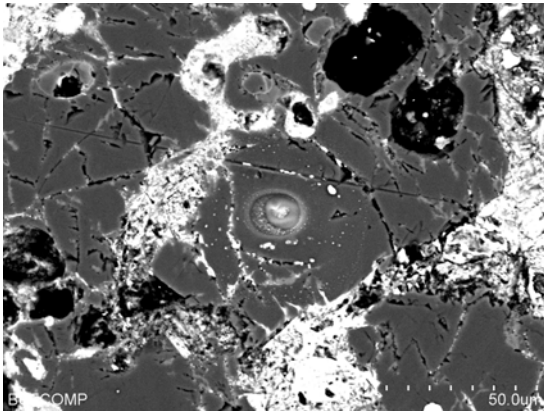

| Ch#                   | Analysis              |                       |   | Remarks |
|-----------------------|-----------------------|-----------------------|---|---------|
| <b>3</b>              | N3: 231.OI            |                       |   |         |
| $\delta^{17}\text{O}$ | $\delta^{18}\text{O}$ | $\Delta^{17}\text{O}$ | ‰ |         |
| -6.80                 | -3.58                 | -4.94                 |   |         |

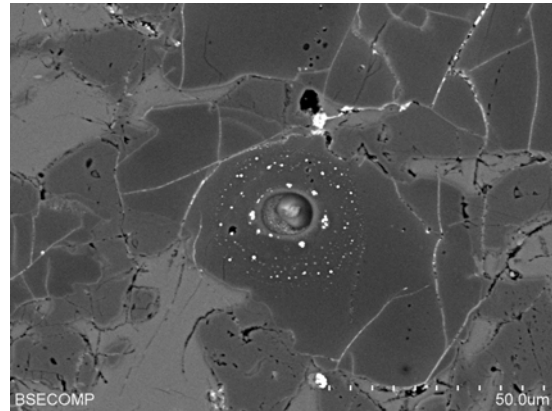

| Ch#                   | Analysis              |                       |   | Remarks |
|-----------------------|-----------------------|-----------------------|---|---------|
| <b>3</b>              | N3: 232.IntPx         |                       |   |         |
| $\delta^{17}\text{O}$ | $\delta^{18}\text{O}$ | $\Delta^{17}\text{O}$ | ‰ |         |
| -6.46                 | -3.40                 | -4.69                 |   |         |

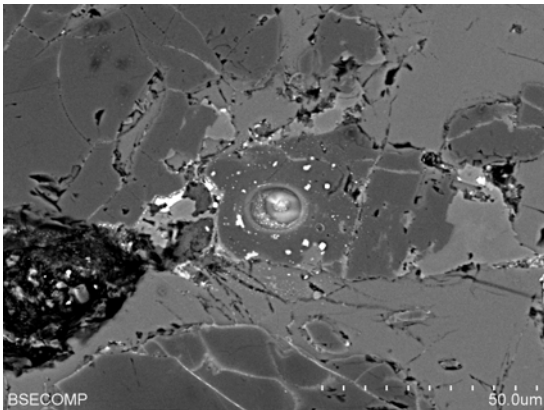

| Ch#                   | Analysis              |                       |   | Remarks |
|-----------------------|-----------------------|-----------------------|---|---------|
| <b>3</b>              | N3: 233.Lpx           |                       |   | C       |
| $\delta^{17}\text{O}$ | $\delta^{18}\text{O}$ | $\Delta^{17}\text{O}$ | ‰ |         |
| -6.66                 | -3.29                 | -4.94                 |   |         |

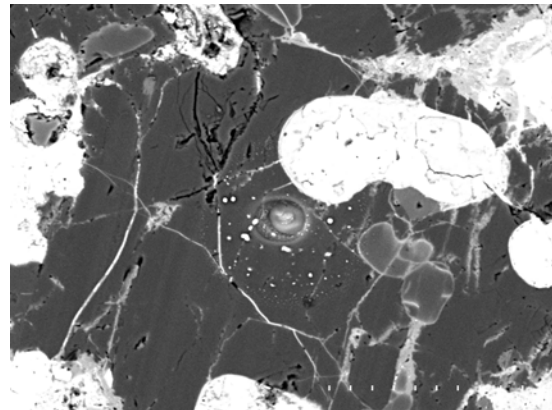

| Ch#                   | Analysis              |                       |   | Remarks |
|-----------------------|-----------------------|-----------------------|---|---------|
| 4                     | N4: 246.Lpx           |                       |   |         |
| $\delta^{17}\text{O}$ | $\delta^{18}\text{O}$ | $\Delta^{17}\text{O}$ | ‰ |         |
| -7.43                 | -4.57                 | -5.05                 |   |         |

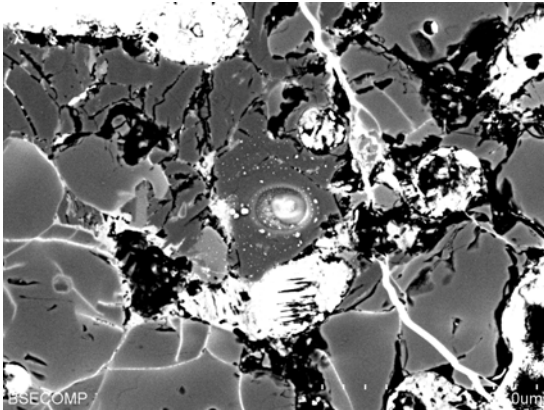

| Ch#                   | Analysis              |                       |   | Remarks |
|-----------------------|-----------------------|-----------------------|---|---------|
| 4                     | N4: 247.OI (Relict)   |                       |   |         |
| $\delta^{17}\text{O}$ | $\delta^{18}\text{O}$ | $\Delta^{17}\text{O}$ | ‰ |         |
| -10.53                | -7.56                 | -6.60                 |   |         |

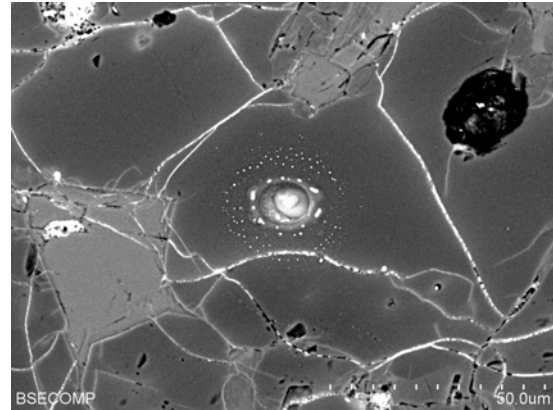

| Ch#                   | Analysis              |                       |   | Remarks |
|-----------------------|-----------------------|-----------------------|---|---------|
| 4                     | N4: 248.IntPx         |                       |   |         |
| $\delta^{17}\text{O}$ | $\delta^{18}\text{O}$ | $\Delta^{17}\text{O}$ | ‰ |         |
| -7.26                 | -4.45                 | -4.95                 |   |         |

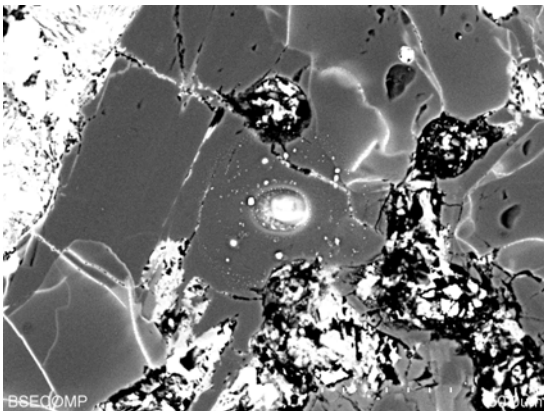

| Ch#                   | Analysis              |                       |   | Remarks |
|-----------------------|-----------------------|-----------------------|---|---------|
| 4                     | N4: 249.Lpx           |                       |   |         |
| $\delta^{17}\text{O}$ | $\delta^{18}\text{O}$ | $\Delta^{17}\text{O}$ | ‰ |         |
| -7.17                 | -4.08                 | -5.05                 |   |         |

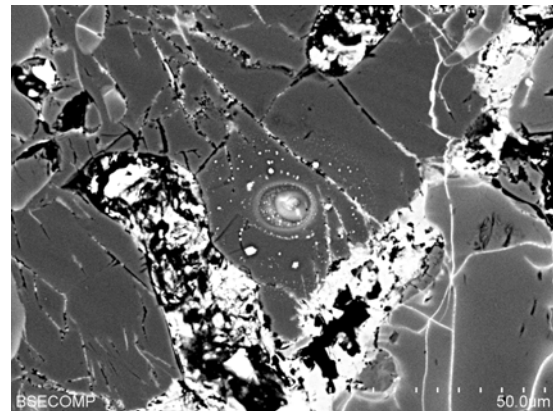

| Ch#                   | Analysis              |                       |   | Remarks |
|-----------------------|-----------------------|-----------------------|---|---------|
| 4                     | N4: 250.Lpx           |                       |   |         |
| $\delta^{17}\text{O}$ | $\delta^{18}\text{O}$ | $\Delta^{17}\text{O}$ | ‰ |         |
| -7.42                 | -4.54                 | -5.06                 |   |         |

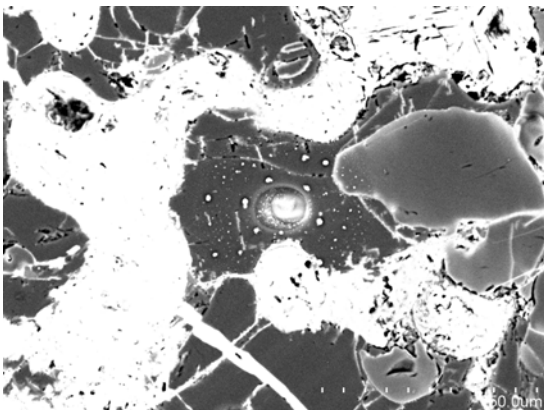

| Ch#                   | Analysis              |                       |   | Remarks |
|-----------------------|-----------------------|-----------------------|---|---------|
| 4                     | N4: 251.OI            |                       |   |         |
| $\delta^{17}\text{O}$ | $\delta^{18}\text{O}$ | $\Delta^{17}\text{O}$ | ‰ |         |
| -7.22                 | -4.04                 | -5.12                 |   |         |

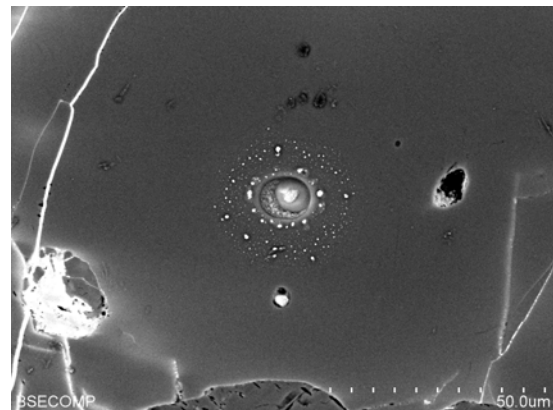



| Ch#                   | Analysis              |                       |   | Remarks |
|-----------------------|-----------------------|-----------------------|---|---------|
| <b>4</b>              | N4: 252.OI (Relict)   |                       |   |         |
| $\delta^{17}\text{O}$ | $\delta^{18}\text{O}$ | $\Delta^{17}\text{O}$ | ‰ |         |
| -10.45                | -7.32                 | -6.65                 |   |         |

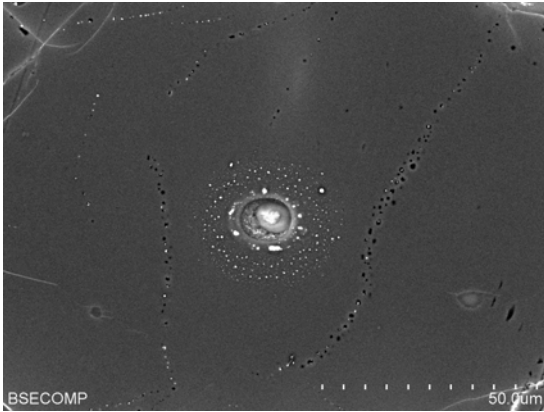

| Ch#                   | Analysis              |                       |   | Remarks |
|-----------------------|-----------------------|-----------------------|---|---------|
| <b>4</b>              | N4: 253.OI (Relict)   |                       |   |         |
| $\delta^{17}\text{O}$ | $\delta^{18}\text{O}$ | $\Delta^{17}\text{O}$ | ‰ |         |
| -10.51                | -7.37                 | -6.68                 |   |         |

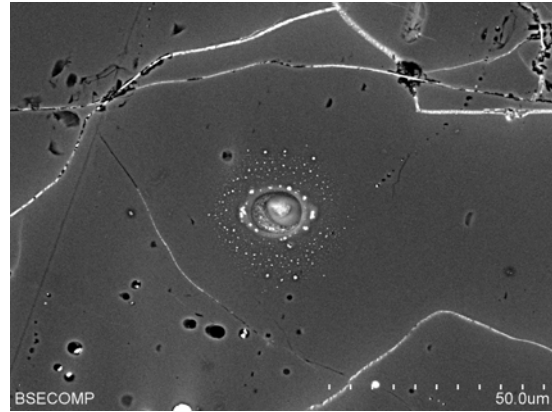

| Ch#                   | Analysis              |                       |   | Remarks |
|-----------------------|-----------------------|-----------------------|---|---------|
| <b>4</b>              | N4: 254.OI (Relict)   |                       |   |         |
| $\delta^{17}\text{O}$ | $\delta^{18}\text{O}$ | $\Delta^{17}\text{O}$ | ‰ |         |
| -10.22                | -7.27                 | -6.44                 |   |         |

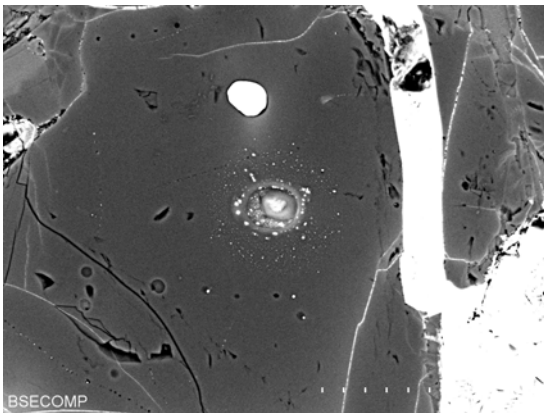

| Ch#                   | Analysis              |                       |   | Remarks |
|-----------------------|-----------------------|-----------------------|---|---------|
| <b>4</b>              | N4: 255.OI (Relict)   |                       |   |         |
| $\delta^{17}\text{O}$ | $\delta^{18}\text{O}$ | $\Delta^{17}\text{O}$ | ‰ |         |
| -10.27                | -7.30                 | -6.48                 |   |         |

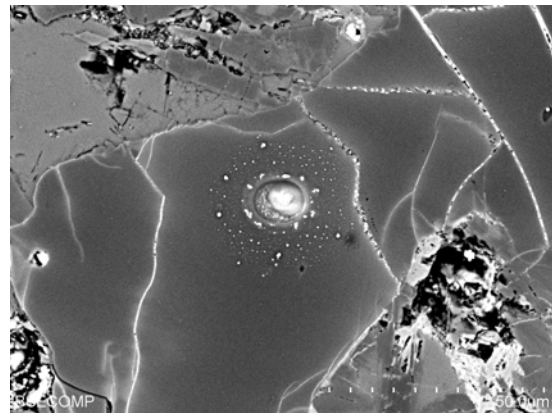

| Ch#                   | Analysis              |                       |   | Remarks |
|-----------------------|-----------------------|-----------------------|---|---------|
| <b>4</b>              | N4: 256.OI (Relict)   |                       |   |         |
| $\delta^{17}\text{O}$ | $\delta^{18}\text{O}$ | $\Delta^{17}\text{O}$ | ‰ |         |
| -10.49                | -7.17                 | -6.76                 |   |         |

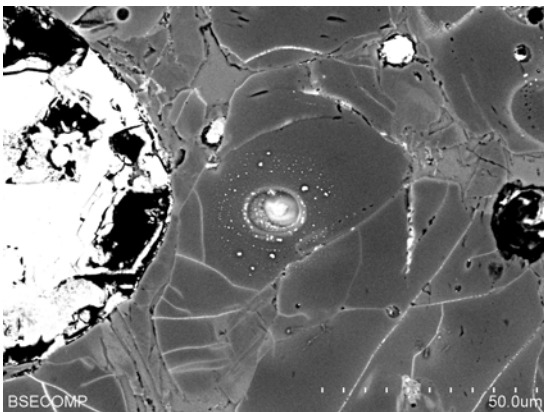

| Ch#                   | Analysis              |                       |   | Remarks |
|-----------------------|-----------------------|-----------------------|---|---------|
| <b>5</b>              | N5: 215.Lpx           |                       |   |         |
| $\delta^{17}\text{O}$ | $\delta^{18}\text{O}$ | $\Delta^{17}\text{O}$ | ‰ |         |
| -7.79                 | -5.28                 | -5.04                 |   |         |

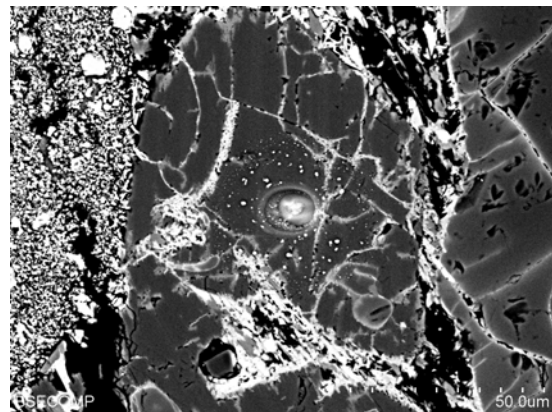

| Ch#                   | Analysis              |                       |   | Remarks |
|-----------------------|-----------------------|-----------------------|---|---------|
| <b>5</b>              | N5: 216.Lpx           |                       |   |         |
| $\delta^{17}\text{O}$ | $\delta^{18}\text{O}$ | $\Delta^{17}\text{O}$ | ‰ |         |
| -8.04                 | -5.40                 | -5.23                 |   |         |

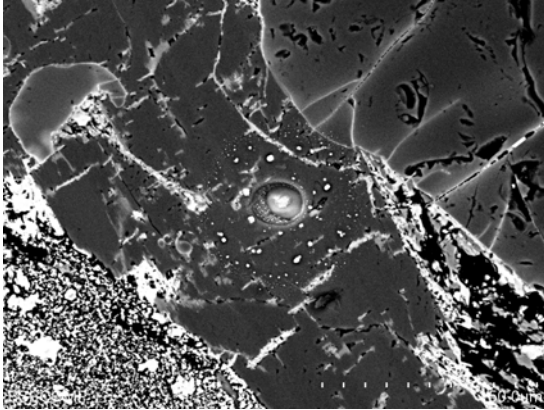

| Ch#                   | Analysis              |                       |   | Remarks |
|-----------------------|-----------------------|-----------------------|---|---------|
| <b>5</b>              | N5: 217.OI            |                       |   |         |
| $\delta^{17}\text{O}$ | $\delta^{18}\text{O}$ | $\Delta^{17}\text{O}$ | ‰ |         |
| -8.40                 | -5.64                 | -5.47                 |   |         |

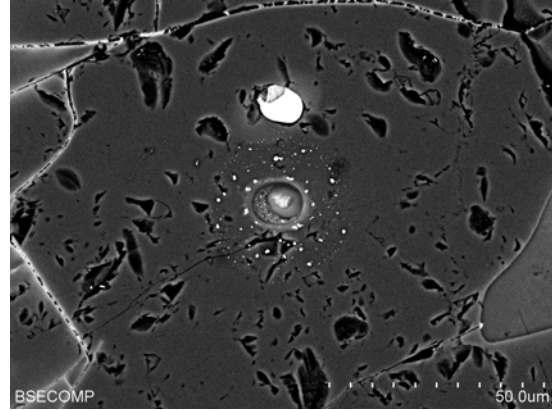

| Ch#                   | Analysis              |                       |   | Remarks |
|-----------------------|-----------------------|-----------------------|---|---------|
| <b>5</b>              | N5: 218.OI            |                       |   |         |
| $\delta^{17}\text{O}$ | $\delta^{18}\text{O}$ | $\Delta^{17}\text{O}$ | ‰ |         |
| -8.31                 | -5.85                 | -5.26                 |   |         |

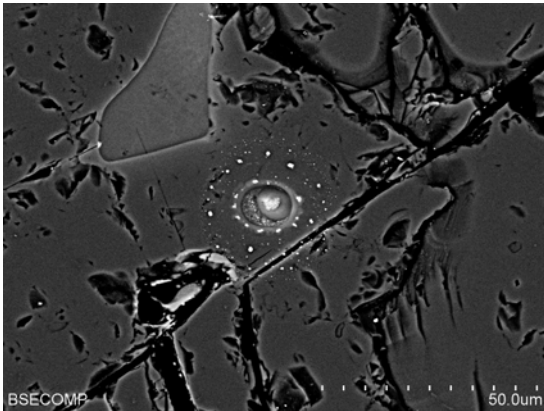

| Ch#                   | Analysis              |                       |   | Remarks |
|-----------------------|-----------------------|-----------------------|---|---------|
| <b>5</b>              | N5: 219.OI            |                       |   |         |
| $\delta^{17}\text{O}$ | $\delta^{18}\text{O}$ | $\Delta^{17}\text{O}$ | ‰ |         |
| -8.33                 | -5.28                 | -5.58                 |   |         |

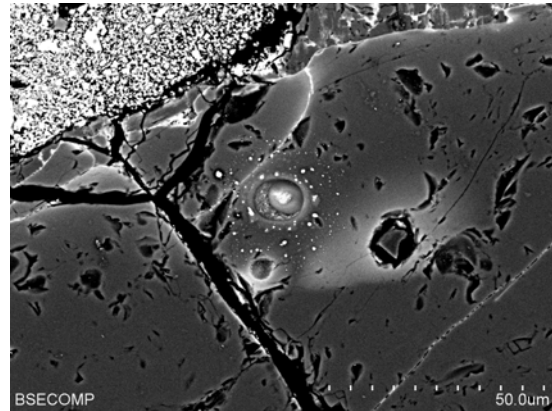

| Ch#                   | Analysis              |                       |   | Remarks |
|-----------------------|-----------------------|-----------------------|---|---------|
| <b>5</b>              | N5: 220.OI            |                       |   |         |
| $\delta^{17}\text{O}$ | $\delta^{18}\text{O}$ | $\Delta^{17}\text{O}$ | ‰ |         |
| -8.30                 | -5.36                 | -5.51                 |   |         |

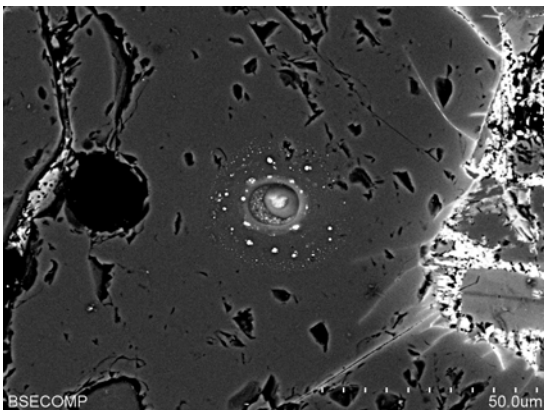

| Ch#                   | Analysis              |                       |   | Remarks |
|-----------------------|-----------------------|-----------------------|---|---------|
| <b>6</b>              | N6: 234.Lpx           |                       |   |         |
| $\delta^{17}\text{O}$ | $\delta^{18}\text{O}$ | $\Delta^{17}\text{O}$ | ‰ |         |
| -7.97                 | -5.14                 | -5.30                 |   |         |

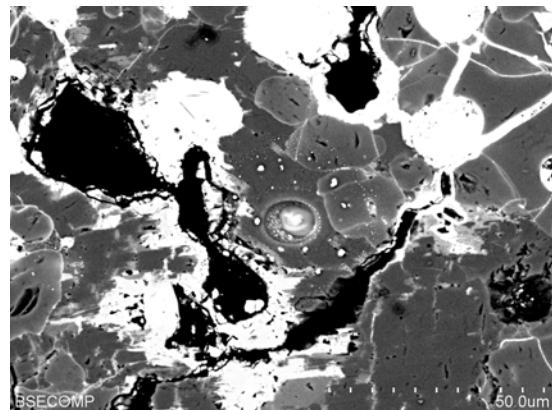

| Ch#                   | Analysis              |                       |   | Remarks |
|-----------------------|-----------------------|-----------------------|---|---------|
| <b>6</b>              | N6: 235.OI            |                       |   |         |
| $\delta^{17}\text{O}$ | $\delta^{18}\text{O}$ | $\Delta^{17}\text{O}$ | ‰ |         |
| -8.56                 | -6.28                 | -5.30                 |   |         |

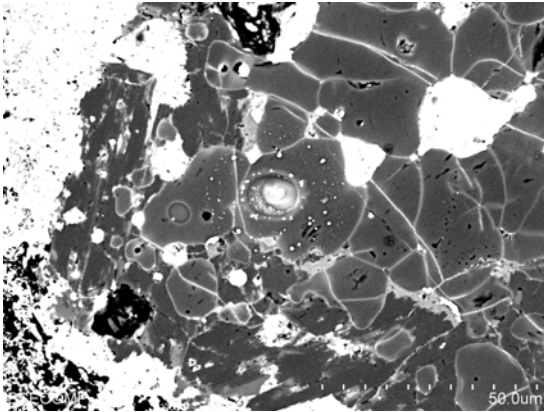

| Ch#                   | Analysis              |                       |   | Remarks |
|-----------------------|-----------------------|-----------------------|---|---------|
| <b>6</b>              | N6: 236.Lpx           |                       |   | CC      |
| $\delta^{17}\text{O}$ | $\delta^{18}\text{O}$ | $\Delta^{17}\text{O}$ | ‰ |         |
| -7.94                 | -5.08                 | -5.30                 |   |         |

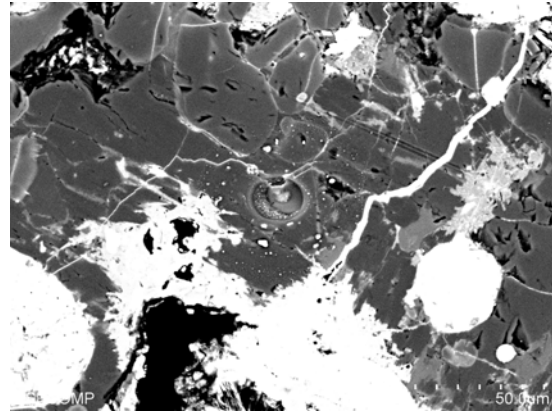

| Ch#                   | Analysis              |                       |   | Remarks |
|-----------------------|-----------------------|-----------------------|---|---------|
| <b>6</b>              | N6: 237.OI            |                       |   |         |
| $\delta^{17}\text{O}$ | $\delta^{18}\text{O}$ | $\Delta^{17}\text{O}$ | ‰ |         |
| -8.39                 | -6.04                 | -5.25                 |   |         |

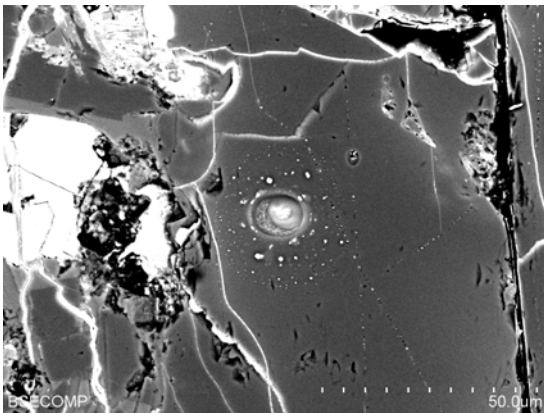

| Ch#                   | Analysis              |                       |   | Remarks |
|-----------------------|-----------------------|-----------------------|---|---------|
| <b>6</b>              | N6: 238.OI            |                       |   |         |
| $\delta^{17}\text{O}$ | $\delta^{18}\text{O}$ | $\Delta^{17}\text{O}$ | ‰ |         |
| -8.35                 | -6.20                 | -5.13                 |   |         |

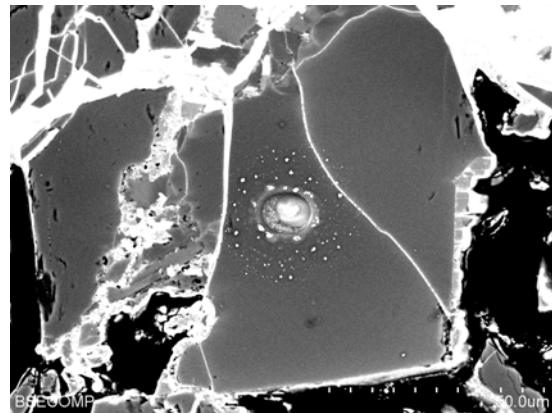

| Ch#                   | Analysis              |                       |   | Remarks |
|-----------------------|-----------------------|-----------------------|---|---------|
| <b>6</b>              | N6: 239.OI            |                       |   |         |
| $\delta^{17}\text{O}$ | $\delta^{18}\text{O}$ | $\Delta^{17}\text{O}$ | ‰ |         |
| -8.56                 | -6.49                 | -5.18                 |   |         |

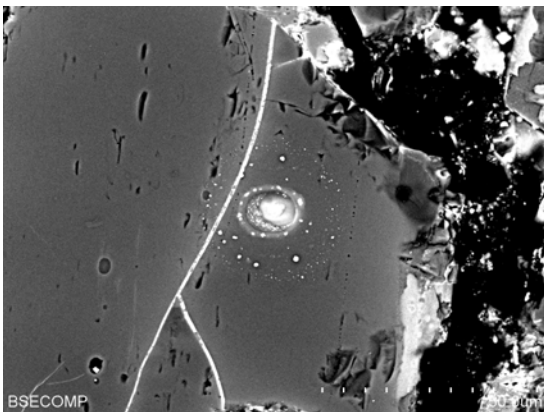

| Ch#                   | Analysis              |                       |   | Remarks |
|-----------------------|-----------------------|-----------------------|---|---------|
| <b>6</b>              | N6: 240.OI            |                       |   | MI      |
| $\delta^{17}\text{O}$ | $\delta^{18}\text{O}$ | $\Delta^{17}\text{O}$ | ‰ |         |
| -8.23                 | -6.03                 | -5.10                 |   |         |

| Ch#                   | Analysis              |                       |   | Remarks |
|-----------------------|-----------------------|-----------------------|---|---------|
| <b>6</b>              | <b>N6: 241.OI</b>     |                       |   |         |
| $\delta^{17}\text{O}$ | $\delta^{18}\text{O}$ | $\Delta^{17}\text{O}$ | ‰ |         |
| -8.73                 | -6.32                 | -5.44                 |   |         |

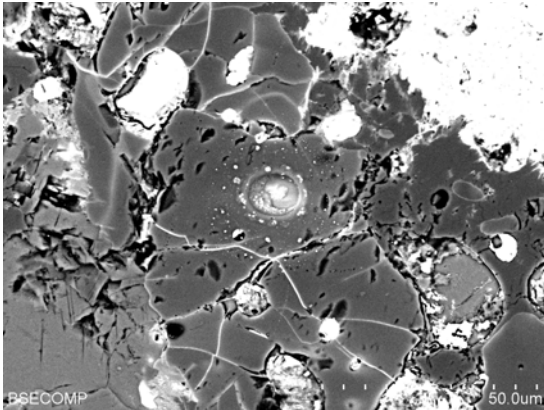

| Ch#                   | Analysis              |                       |   | Remarks |
|-----------------------|-----------------------|-----------------------|---|---------|
| <b>7</b>              | <b>N7: 358.Lpx</b>    |                       |   |         |
| $\delta^{17}\text{O}$ | $\delta^{18}\text{O}$ | $\Delta^{17}\text{O}$ | ‰ |         |
| -7.83                 | -5.46                 | -4.99                 |   |         |

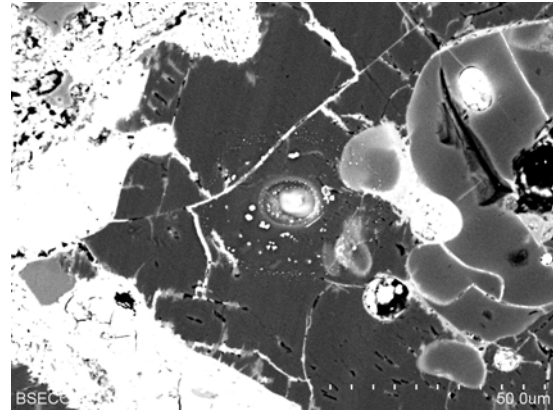

| Ch#                   | Analysis              |                       |   | Remarks |
|-----------------------|-----------------------|-----------------------|---|---------|
| <b>7</b>              | <b>N7: 359.OI</b>     |                       |   |         |
| $\delta^{17}\text{O}$ | $\delta^{18}\text{O}$ | $\Delta^{17}\text{O}$ | ‰ |         |
| -8.04                 | -5.33                 | -5.26                 |   |         |

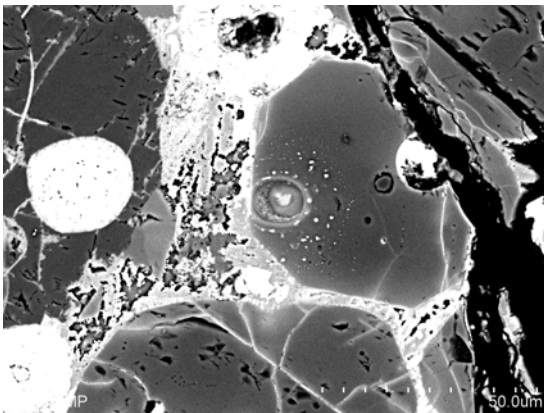

| Ch#                   | Analysis                   |                       |   | Remarks |
|-----------------------|----------------------------|-----------------------|---|---------|
| <b>7</b>              | <b>N7: 360.OI (Relict)</b> |                       |   |         |
| $\delta^{17}\text{O}$ | $\delta^{18}\text{O}$      | $\Delta^{17}\text{O}$ | ‰ |         |
| -1.04                 | 1.59                       | -1.87                 |   |         |

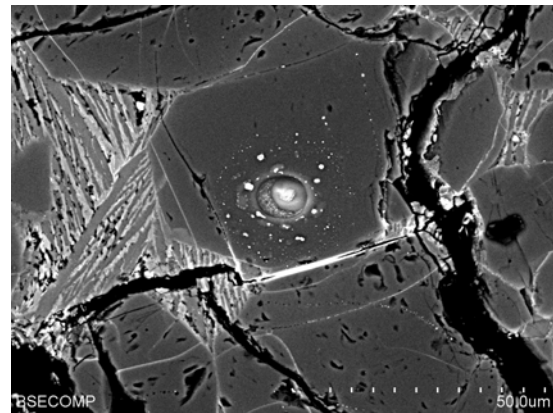

| Ch#                   | Analysis                   |                       |   | Remarks |
|-----------------------|----------------------------|-----------------------|---|---------|
| <b>7</b>              | <b>N7: 361.OI (Relict)</b> |                       |   |         |
| $\delta^{17}\text{O}$ | $\delta^{18}\text{O}$      | $\Delta^{17}\text{O}$ | ‰ |         |
| -1.58                 | 1.05                       | -2.13                 |   |         |

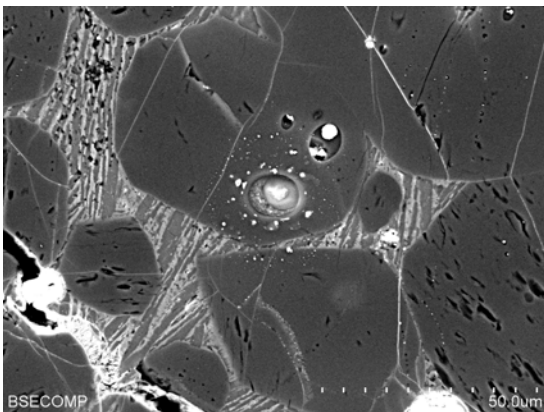

| Ch#                   | Analysis                   |                       |   | Remarks |
|-----------------------|----------------------------|-----------------------|---|---------|
| <b>7</b>              | <b>N7: 362.OI (Relict)</b> |                       |   |         |
| $\delta^{17}\text{O}$ | $\delta^{18}\text{O}$      | $\Delta^{17}\text{O}$ | ‰ |         |
| -6.29                 | -3.47                      | -4.48                 |   |         |

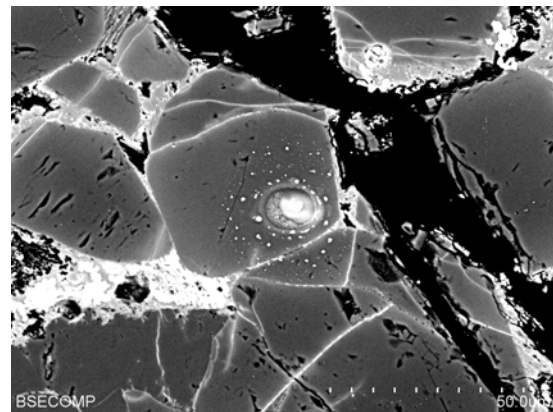

| Ch#                   | Analysis              |                       |   | Remarks |
|-----------------------|-----------------------|-----------------------|---|---------|
| 7                     | N7: 363.Lpx           |                       |   |         |
| $\delta^{17}\text{O}$ | $\delta^{18}\text{O}$ | $\Delta^{17}\text{O}$ | ‰ |         |
| -8.08                 | -5.43                 | -5.26                 |   |         |

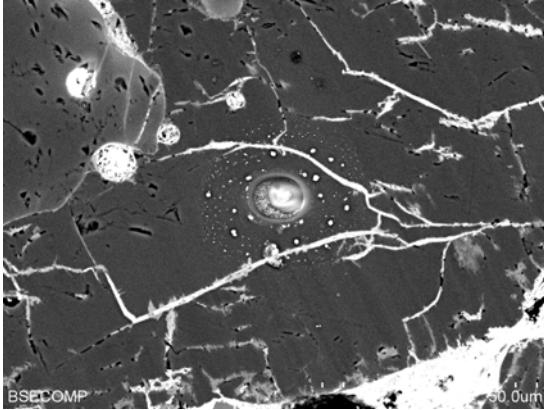

| Ch#                   | Analysis              |                       |   | Remarks |
|-----------------------|-----------------------|-----------------------|---|---------|
| 7                     | N7: 364.Lpx           |                       |   |         |
| $\delta^{17}\text{O}$ | $\delta^{18}\text{O}$ | $\Delta^{17}\text{O}$ | ‰ |         |
| -8.23                 | -5.28                 | -5.49                 |   |         |

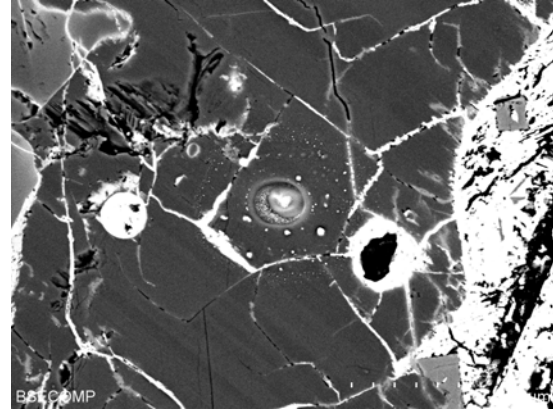

| Ch#                   | Analysis              |                       |   | Remarks |
|-----------------------|-----------------------|-----------------------|---|---------|
| 7                     | N7: 365.Lpx           |                       |   |         |
| $\delta^{17}\text{O}$ | $\delta^{18}\text{O}$ | $\Delta^{17}\text{O}$ | ‰ |         |
| -7.92                 | -5.55                 | -5.04                 |   |         |

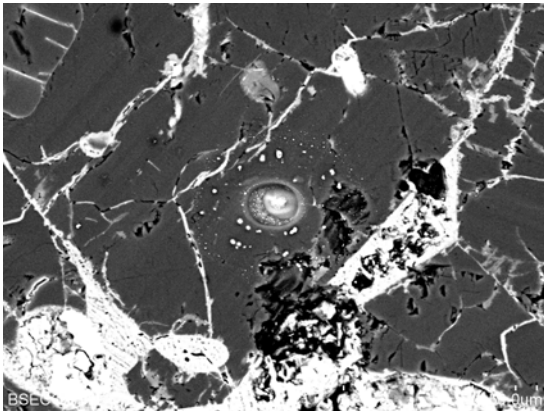

| Ch#                   | Analysis              |                       |   | Remarks |
|-----------------------|-----------------------|-----------------------|---|---------|
| 8                     | N8: 366.Lpx           |                       |   |         |
| $\delta^{17}\text{O}$ | $\delta^{18}\text{O}$ | $\Delta^{17}\text{O}$ | ‰ |         |
| -6.14                 | -3.47                 | -4.33                 |   |         |

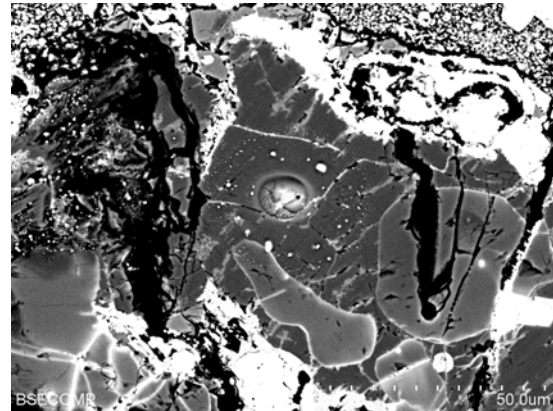

| Ch#                   | Analysis              |                       |   | Remarks |
|-----------------------|-----------------------|-----------------------|---|---------|
| 8                     | N8: 367.Lpx           |                       |   |         |
| $\delta^{17}\text{O}$ | $\delta^{18}\text{O}$ | $\Delta^{17}\text{O}$ | ‰ |         |
| -6.77                 | -3.67                 | -4.86                 |   |         |

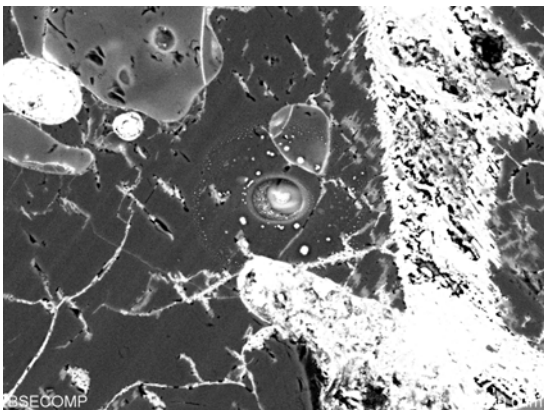

| Ch#                   | Analysis              |                       |   | Remarks |
|-----------------------|-----------------------|-----------------------|---|---------|
| 8                     | N8: 368.Lpx           |                       |   |         |
| $\delta^{17}\text{O}$ | $\delta^{18}\text{O}$ | $\Delta^{17}\text{O}$ | ‰ |         |
| -6.26                 | -3.98                 | -4.19                 |   |         |

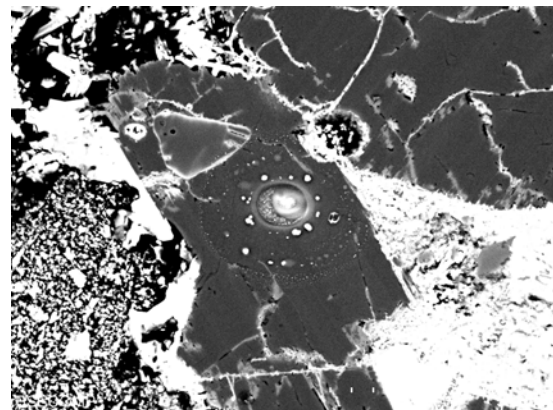

| Ch#                   | Analysis              |                       |   | Remarks |
|-----------------------|-----------------------|-----------------------|---|---------|
| <b>8</b>              | N8: 369.OI (Relict)   |                       |   |         |
| $\delta^{17}\text{O}$ | $\delta^{18}\text{O}$ | $\Delta^{17}\text{O}$ | ‰ |         |
| -5.36                 | -2.86                 | -3.88                 |   |         |

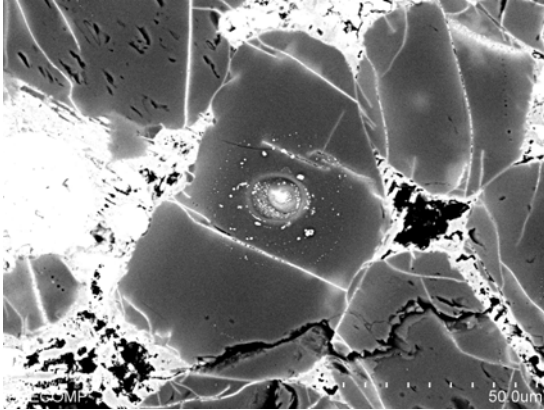

| Ch#                   | Analysis              |                       |   | Remarks |
|-----------------------|-----------------------|-----------------------|---|---------|
| <b>8</b>              | N8: 370.OI (Excl.)    |                       |   | P, U    |
| $\delta^{17}\text{O}$ | $\delta^{18}\text{O}$ | $\Delta^{17}\text{O}$ | ‰ |         |
| -8.05                 | -5.51                 | -5.18                 |   |         |

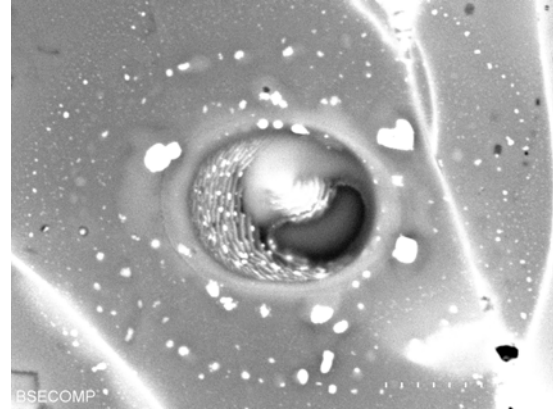

| Ch#                   | Analysis              |                       |   | Remarks |
|-----------------------|-----------------------|-----------------------|---|---------|
| <b>8</b>              | N8: 371.OI            |                       |   |         |
| $\delta^{17}\text{O}$ | $\delta^{18}\text{O}$ | $\Delta^{17}\text{O}$ | ‰ |         |
| -6.27                 | -3.35                 | -4.53                 |   |         |

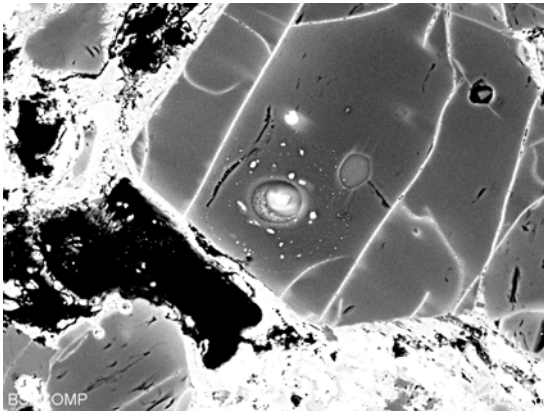

| Ch#                   | Analysis              |                       |   | Remarks |
|-----------------------|-----------------------|-----------------------|---|---------|
| <b>8</b>              | N8: 372.OI            |                       |   |         |
| $\delta^{17}\text{O}$ | $\delta^{18}\text{O}$ | $\Delta^{17}\text{O}$ | ‰ |         |
| -6.67                 | -4.38                 | -4.39                 |   |         |

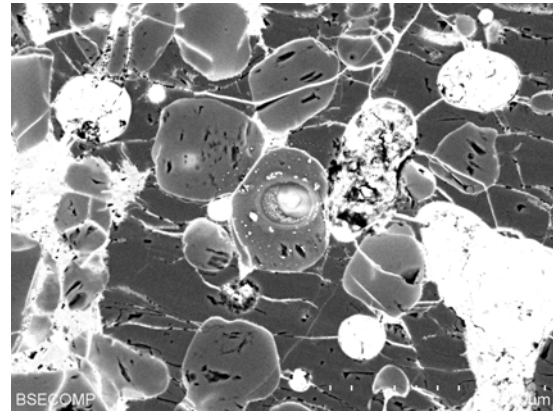

| Ch#                   | Analysis              |                       |   | Remarks |
|-----------------------|-----------------------|-----------------------|---|---------|
| <b>8</b>              | N8: 373.Lpx           |                       |   |         |
| $\delta^{17}\text{O}$ | $\delta^{18}\text{O}$ | $\Delta^{17}\text{O}$ | ‰ |         |
| -6.80                 | -3.58                 | -4.94                 |   |         |

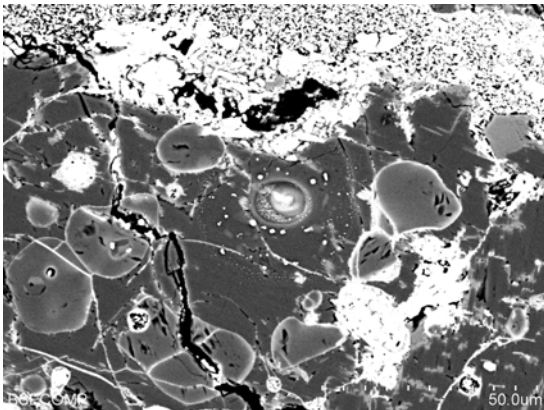

| Ch#                   | Analysis              |                       |   | Remarks |
|-----------------------|-----------------------|-----------------------|---|---------|
| <b>9</b>              | N9: 378.Lpx           |                       |   |         |
| $\delta^{17}\text{O}$ | $\delta^{18}\text{O}$ | $\Delta^{17}\text{O}$ | ‰ |         |
| -8.02                 | -5.30                 | -5.26                 |   |         |

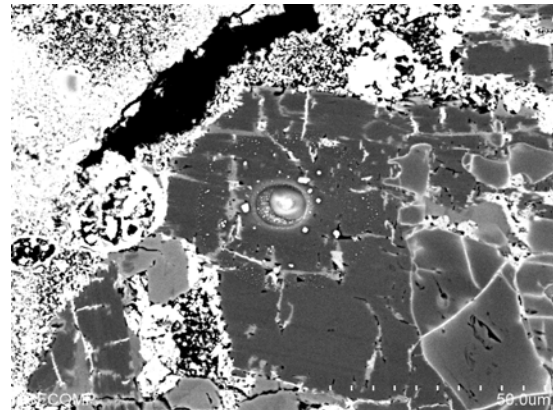

| Ch#                   | Analysis              |                       |   | Remarks |
|-----------------------|-----------------------|-----------------------|---|---------|
| <b>9</b>              | N9: 379.Lpx           |                       |   |         |
| $\delta^{17}\text{O}$ | $\delta^{18}\text{O}$ | $\Delta^{17}\text{O}$ | ‰ |         |
| -8.11                 | -5.60                 | -5.20                 |   |         |

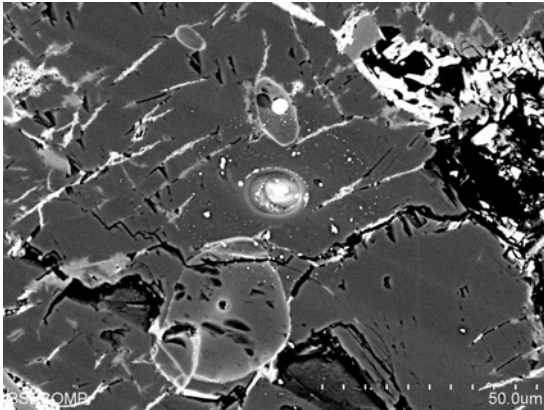

| Ch#                   | Analysis              |                       |   | Remarks |
|-----------------------|-----------------------|-----------------------|---|---------|
| <b>9</b>              | N9: 380.Lpx           |                       |   |         |
| $\delta^{17}\text{O}$ | $\delta^{18}\text{O}$ | $\Delta^{17}\text{O}$ | ‰ |         |
| -7.77                 | -5.41                 | -4.95                 |   |         |

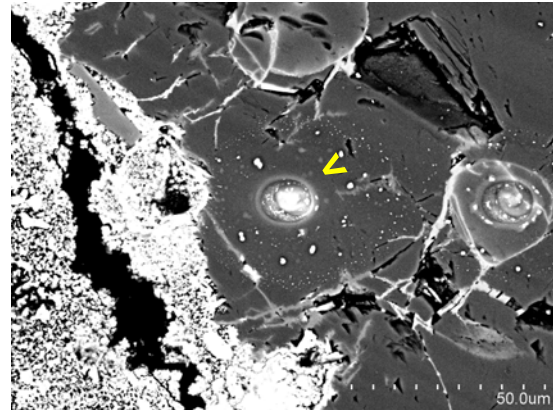

| Ch#                   | Analysis              |                       |   | Remarks |
|-----------------------|-----------------------|-----------------------|---|---------|
| <b>9</b>              | N9: 381.OI (Relict)   |                       |   | C       |
| $\delta^{17}\text{O}$ | $\delta^{18}\text{O}$ | $\Delta^{17}\text{O}$ | ‰ |         |
| -9.04                 | -6.25                 | -5.79                 |   |         |

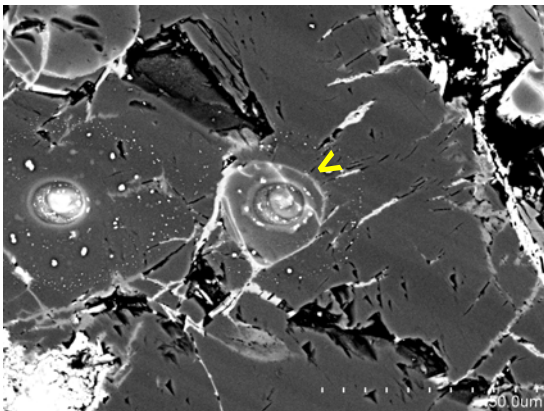

| Ch#                   | Analysis              |                       |   | Remarks |
|-----------------------|-----------------------|-----------------------|---|---------|
| <b>9</b>              | N9: 382.Lpx           |                       |   |         |
| $\delta^{17}\text{O}$ | $\delta^{18}\text{O}$ | $\Delta^{17}\text{O}$ | ‰ |         |
| -7.70                 | -5.23                 | -4.98                 |   |         |

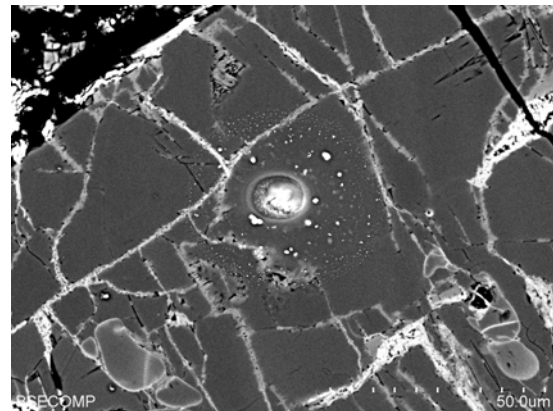

| Ch#                   | Analysis              |                       |   | Remarks |
|-----------------------|-----------------------|-----------------------|---|---------|
| <b>9</b>              | N9: 383.OI            |                       |   |         |
| $\delta^{17}\text{O}$ | $\delta^{18}\text{O}$ | $\Delta^{17}\text{O}$ | ‰ |         |
| -8.07                 | -5.47                 | -5.23                 |   |         |

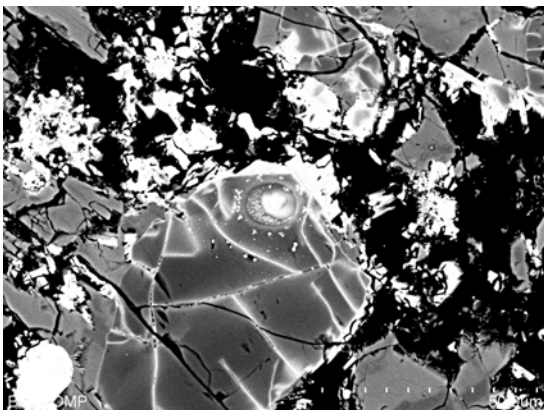

| Ch#                   | Analysis              |                       |   | Remarks |
|-----------------------|-----------------------|-----------------------|---|---------|
| <b>9</b>              | N9: 384.OI (Relict)   |                       |   |         |
| $\delta^{17}\text{O}$ | $\delta^{18}\text{O}$ | $\Delta^{17}\text{O}$ | ‰ |         |
| -14.91                | -12.08                | -8.63                 |   |         |

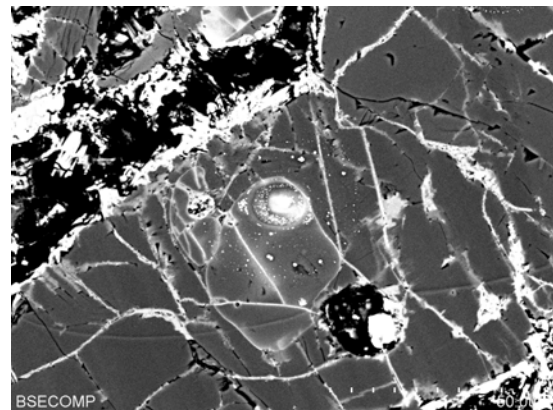

| Ch#                   | Analysis              |                       |   | Remarks |
|-----------------------|-----------------------|-----------------------|---|---------|
| <b>9</b>              | N9: 385.Lpx           |                       |   |         |
| $\delta^{17}\text{O}$ | $\delta^{18}\text{O}$ | $\Delta^{17}\text{O}$ | ‰ |         |
| -7.89                 | -5.43                 | -5.07                 |   |         |

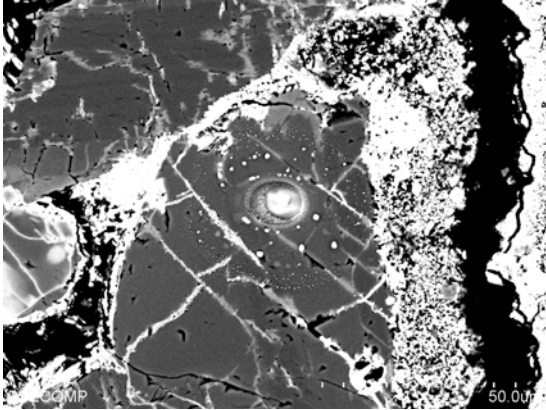

| Ch#                   | Analysis              |                       |   | Remarks |
|-----------------------|-----------------------|-----------------------|---|---------|
| <b>10</b>             | N10: 386.Lpx          |                       |   |         |
| $\delta^{17}\text{O}$ | $\delta^{18}\text{O}$ | $\Delta^{17}\text{O}$ | ‰ |         |
| -8.19                 | -5.24                 | -5.47                 |   |         |

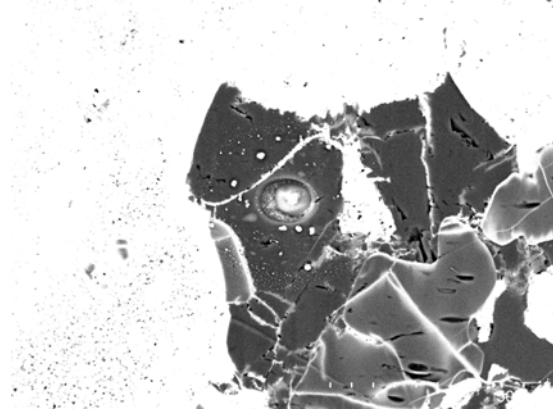

| Ch#                   | Analysis              |                       |   | Remarks |
|-----------------------|-----------------------|-----------------------|---|---------|
| <b>10</b>             | N10: 387.OI           |                       |   |         |
| $\delta^{17}\text{O}$ | $\delta^{18}\text{O}$ | $\Delta^{17}\text{O}$ | ‰ |         |
| -7.60                 | -4.37                 | -5.33                 |   |         |

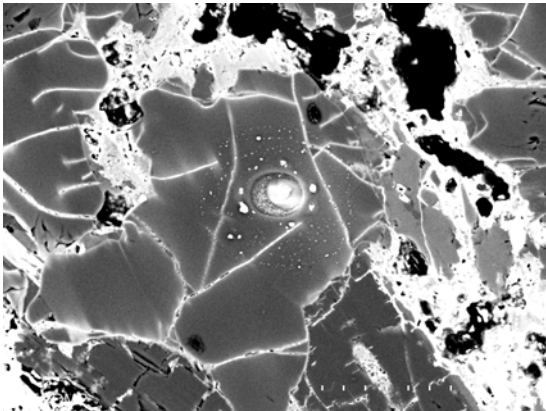

| Ch#                   | Analysis              |                       |   | Remarks |
|-----------------------|-----------------------|-----------------------|---|---------|
| <b>10</b>             | N10: 388.Lpx          |                       |   | C       |
| $\delta^{17}\text{O}$ | $\delta^{18}\text{O}$ | $\Delta^{17}\text{O}$ | ‰ |         |
| -7.17                 | -4.29                 | -4.94                 |   |         |

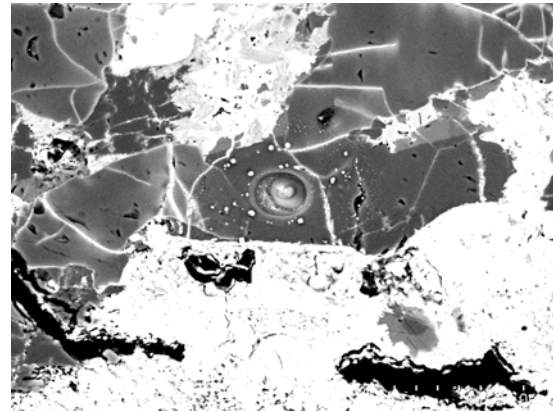

| Ch#                   | Analysis              |                       |   | Remarks |
|-----------------------|-----------------------|-----------------------|---|---------|
| <b>10</b>             | N10: 389.OI           |                       |   |         |
| $\delta^{17}\text{O}$ | $\delta^{18}\text{O}$ | $\Delta^{17}\text{O}$ | ‰ |         |
| -7.67                 | -5.05                 | -5.04                 |   |         |

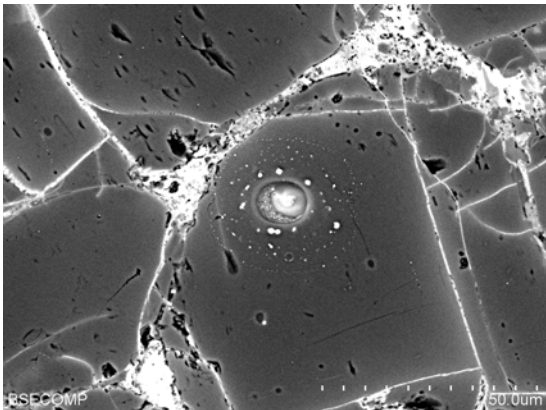

| Ch#                   | Analysis              |                       |   | Remarks |
|-----------------------|-----------------------|-----------------------|---|---------|
| <b>10</b>             | N10: 390.OI           |                       |   |         |
| $\delta^{17}\text{O}$ | $\delta^{18}\text{O}$ | $\Delta^{17}\text{O}$ | ‰ |         |
| -7.38                 | -4.22                 | -5.18                 |   |         |

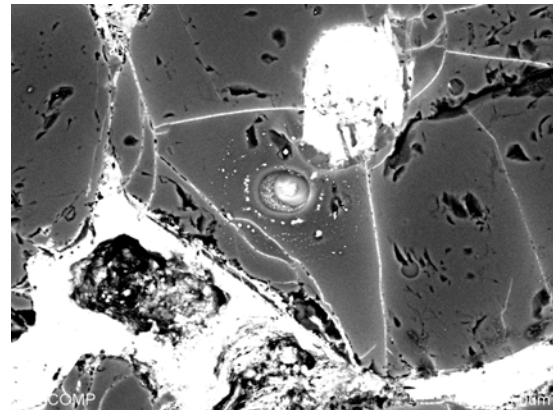



| Ch#                   | Analysis              |                       |   | Remarks |
|-----------------------|-----------------------|-----------------------|---|---------|
| <b>10</b>             | N10: 391.Lpx          |                       |   |         |
| $\delta^{17}\text{O}$ | $\delta^{18}\text{O}$ | $\Delta^{17}\text{O}$ | ‰ |         |
| -7.83                 | -4.96                 | -5.25                 |   |         |

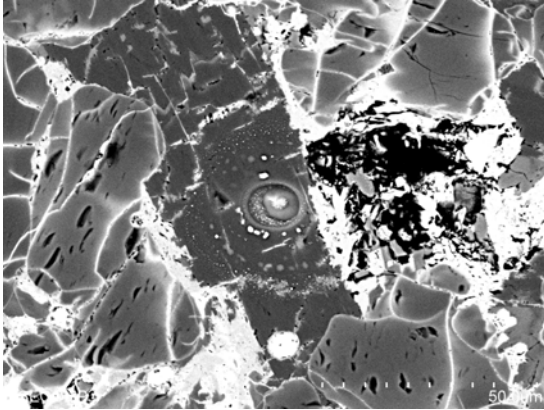

| Ch#                   | Analysis              |                       |   | Remarks |
|-----------------------|-----------------------|-----------------------|---|---------|
| <b>10</b>             | N10: 392.Lpx          |                       |   |         |
| $\delta^{17}\text{O}$ | $\delta^{18}\text{O}$ | $\Delta^{17}\text{O}$ | ‰ |         |
| -7.71                 | -4.73                 | -5.25                 |   |         |

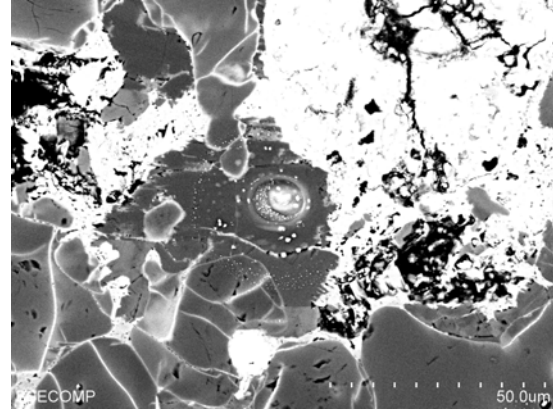

| Ch#                   | Analysis              |                       |   | Remarks |
|-----------------------|-----------------------|-----------------------|---|---------|
| <b>10</b>             | N10: 393.OI           |                       |   |         |
| $\delta^{17}\text{O}$ | $\delta^{18}\text{O}$ | $\Delta^{17}\text{O}$ | ‰ |         |
| -7.75                 | -4.69                 | -5.31                 |   |         |

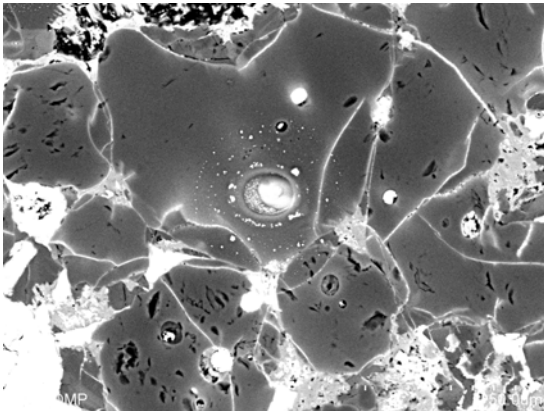

| Ch#                   | Analysis              |                       |   | Remarks |
|-----------------------|-----------------------|-----------------------|---|---------|
| <b>10</b>             | N10: 394.Lpx          |                       |   |         |
| $\delta^{17}\text{O}$ | $\delta^{18}\text{O}$ | $\Delta^{17}\text{O}$ | ‰ |         |
| -7.25                 | -4.69                 | -4.81                 |   |         |

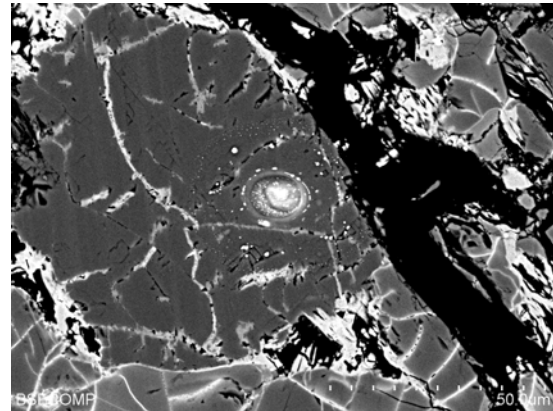

| Ch#                   | Analysis              |                       |   | Remarks |
|-----------------------|-----------------------|-----------------------|---|---------|
| <b>11</b>             | N11: 399.OI           |                       |   |         |
| $\delta^{17}\text{O}$ | $\delta^{18}\text{O}$ | $\Delta^{17}\text{O}$ | ‰ |         |
| -8.68                 | -5.67                 | -5.73                 |   |         |

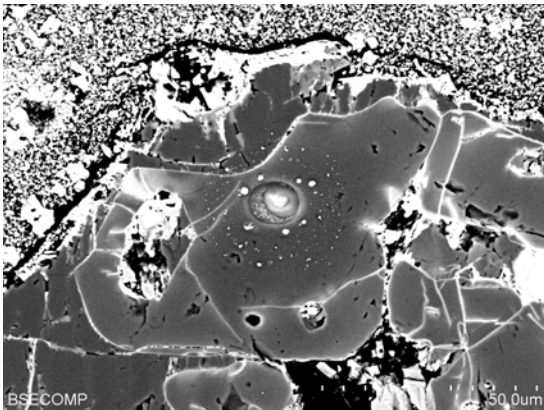

| Ch#                   | Analysis              |                       |   | Remarks |
|-----------------------|-----------------------|-----------------------|---|---------|
| <b>11</b>             | N11: 400.IntPx        |                       |   |         |
| $\delta^{17}\text{O}$ | $\delta^{18}\text{O}$ | $\Delta^{17}\text{O}$ | ‰ |         |
| -7.66                 | -4.70                 | -5.21                 |   |         |

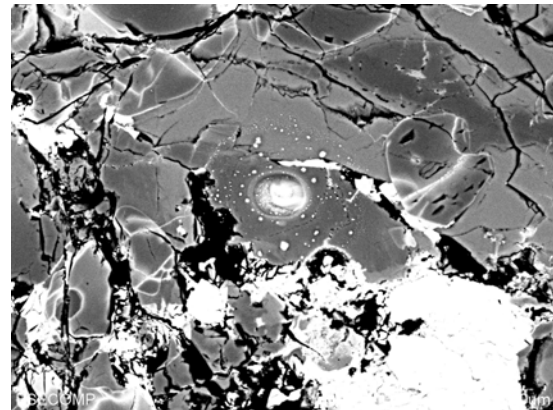

| Ch#                   | Analysis              |                       |   | Remarks |
|-----------------------|-----------------------|-----------------------|---|---------|
| <b>11</b>             | N11: 401.Lpx          |                       |   |         |
| $\delta^{17}\text{O}$ | $\delta^{18}\text{O}$ | $\Delta^{17}\text{O}$ | ‰ |         |
| -7.35                 | -4.56                 | -4.98                 |   |         |

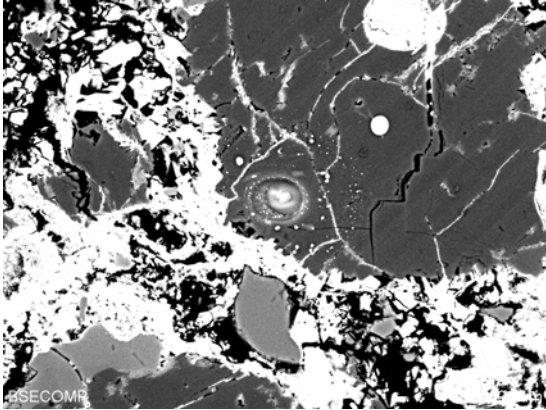

| Ch#                   | Analysis              |                       |   | Remarks |
|-----------------------|-----------------------|-----------------------|---|---------|
| <b>11</b>             | N11: 402.Lpx          |                       |   | C       |
| $\delta^{17}\text{O}$ | $\delta^{18}\text{O}$ | $\Delta^{17}\text{O}$ | ‰ |         |
| -7.56                 | -4.01                 | -5.48                 |   |         |

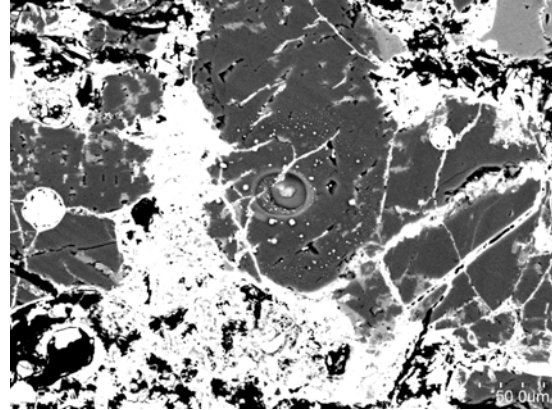

| Ch#                   | Analysis              |                       |   | Remarks |
|-----------------------|-----------------------|-----------------------|---|---------|
| <b>11</b>             | N11: 403.Lpx          |                       |   |         |
| $\delta^{17}\text{O}$ | $\delta^{18}\text{O}$ | $\Delta^{17}\text{O}$ | ‰ |         |
| -7.81                 | -4.66                 | -5.39                 |   |         |

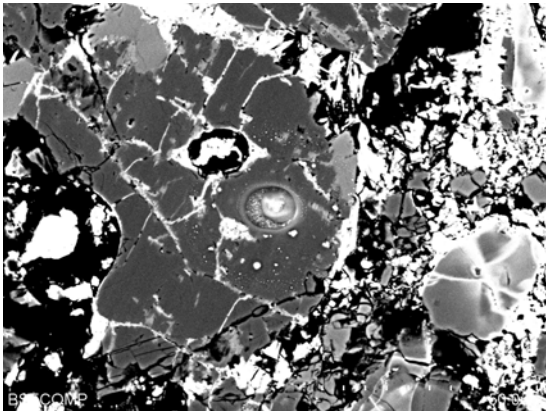

| Ch#                   | Analysis                |                       |   | Remarks |
|-----------------------|-------------------------|-----------------------|---|---------|
| <b>11</b>             | N11: 404.Lpx (Excl.) TP |                       |   |         |
| $\delta^{17}\text{O}$ | $\delta^{18}\text{O}$   | $\Delta^{17}\text{O}$ | ‰ |         |
| -6.79                 | -3.40                   | -5.02                 |   |         |

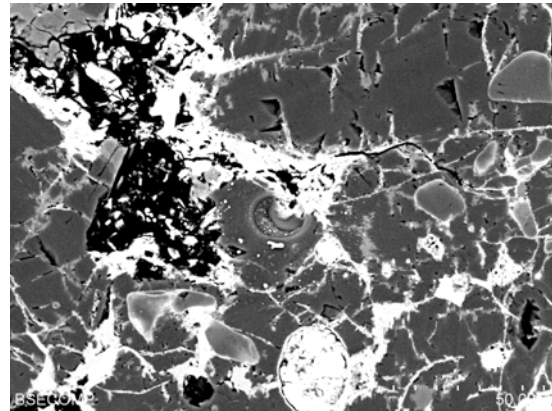

| Ch#                   | Analysis              |                       |   | Remarks |
|-----------------------|-----------------------|-----------------------|---|---------|
| <b>11</b>             | N11: 405.Lpx          |                       |   |         |
| $\delta^{17}\text{O}$ | $\delta^{18}\text{O}$ | $\Delta^{17}\text{O}$ | ‰ |         |
| -7.77                 | -5.07                 | -5.13                 |   |         |

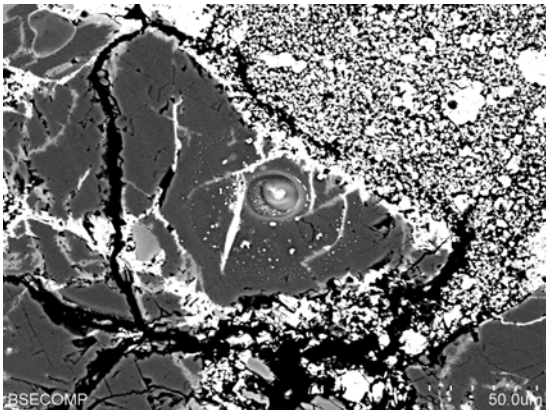

| Ch#                   | Analysis              |                       |   | Remarks |
|-----------------------|-----------------------|-----------------------|---|---------|
| <b>12</b>             | N12: 420.Lpx          |                       |   |         |
| $\delta^{17}\text{O}$ | $\delta^{18}\text{O}$ | $\Delta^{17}\text{O}$ | ‰ |         |
| -6.10                 | -2.66                 | -4.72                 |   |         |

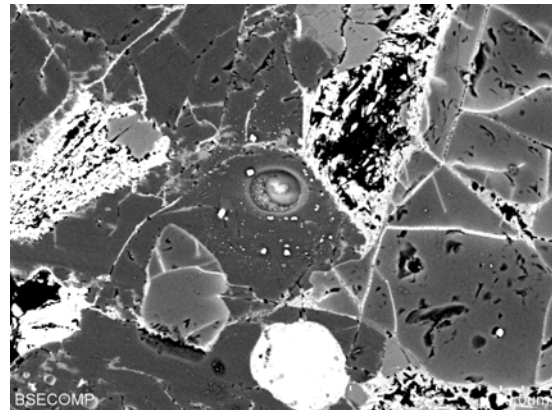

| Ch#                   | Analysis              |                       |   | Remarks |
|-----------------------|-----------------------|-----------------------|---|---------|
| <b>12</b>             | N12: 421.CaPx         |                       |   |         |
| $\delta^{17}\text{O}$ | $\delta^{18}\text{O}$ | $\Delta^{17}\text{O}$ | ‰ |         |
| -6.06                 | -3.36                 | -4.31                 |   |         |

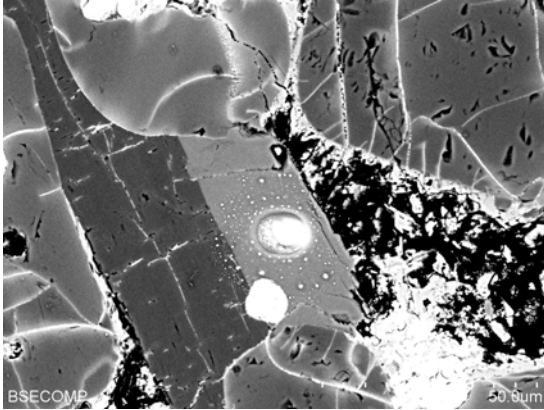

| Ch#                   | Analysis              |                       |   | Remarks |
|-----------------------|-----------------------|-----------------------|---|---------|
| <b>12</b>             | N12: 422.OI           |                       |   |         |
| $\delta^{17}\text{O}$ | $\delta^{18}\text{O}$ | $\Delta^{17}\text{O}$ | ‰ |         |
| -5.91                 | -2.52                 | -4.60                 |   |         |

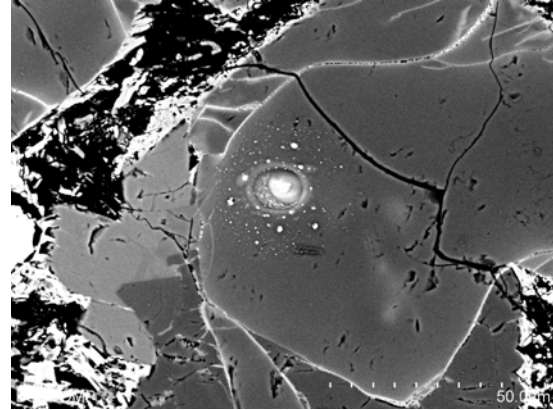

| Ch#                   | Analysis              |                       |   | Remarks |
|-----------------------|-----------------------|-----------------------|---|---------|
| <b>12</b>             | N12: 423.OI           |                       |   |         |
| $\delta^{17}\text{O}$ | $\delta^{18}\text{O}$ | $\Delta^{17}\text{O}$ | ‰ |         |
| -6.03                 | -2.58                 | -4.69                 |   |         |

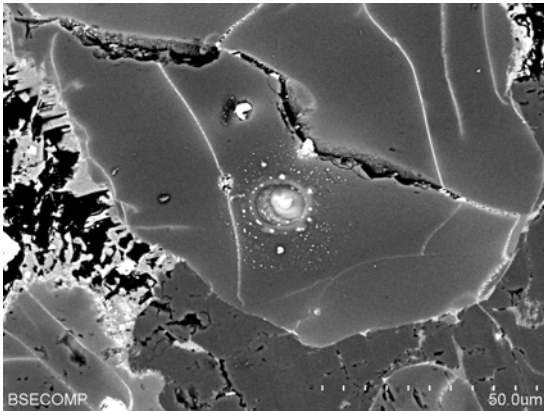

| Ch#                   | Analysis              |                       |   | Remarks |
|-----------------------|-----------------------|-----------------------|---|---------|
| <b>12</b>             | N12: 424.OI (Relict)  |                       |   |         |
| $\delta^{17}\text{O}$ | $\delta^{18}\text{O}$ | $\Delta^{17}\text{O}$ | ‰ |         |
| -8.48                 | -5.02                 | -5.86                 |   |         |

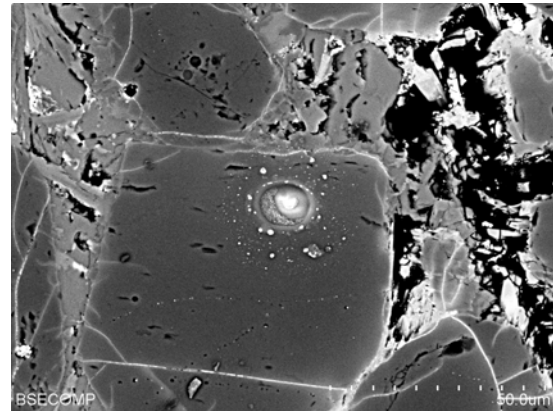

| Ch#                   | Analysis              |                       |   | Remarks |
|-----------------------|-----------------------|-----------------------|---|---------|
| <b>12</b>             | N12: 425.Lpx          |                       |   | C       |
| $\delta^{17}\text{O}$ | $\delta^{18}\text{O}$ | $\Delta^{17}\text{O}$ | ‰ |         |
| -6.23                 | -2.77                 | -4.79                 |   |         |

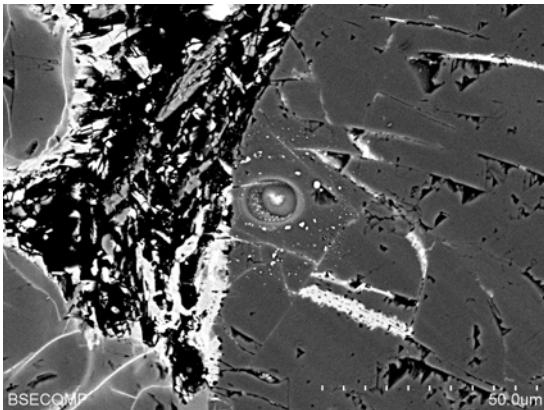

| Ch#                   | Analysis              |                       |   | Remarks |
|-----------------------|-----------------------|-----------------------|---|---------|
| <b>12</b>             | N12: 426.Lpx          |                       |   | C       |
| $\delta^{17}\text{O}$ | $\delta^{18}\text{O}$ | $\Delta^{17}\text{O}$ | ‰ |         |
| -6.21                 | -2.86                 | -4.73                 |   |         |

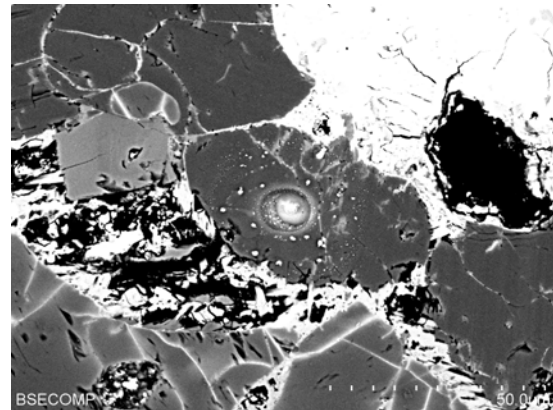

| Ch#                   | Analysis              |                       |   | Remarks |
|-----------------------|-----------------------|-----------------------|---|---------|
| <b>13</b>             | N13: 441.OI           |                       |   |         |
| $\delta^{17}\text{O}$ | $\delta^{18}\text{O}$ | $\Delta^{17}\text{O}$ | ‰ |         |
| -4.26                 | -1.93                 | -3.26                 |   |         |

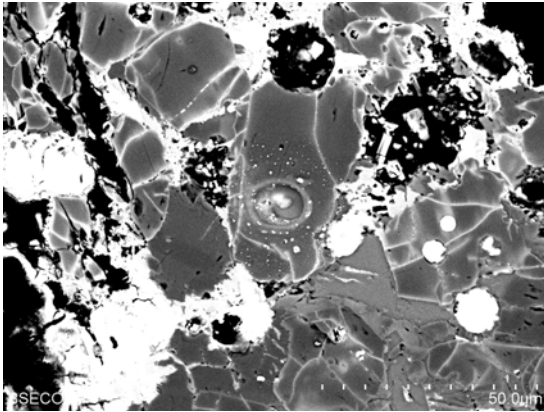

| Ch#                   | Analysis              |                       |   | Remarks |
|-----------------------|-----------------------|-----------------------|---|---------|
| <b>13</b>             | N13: 442.OI           |                       |   |         |
| $\delta^{17}\text{O}$ | $\delta^{18}\text{O}$ | $\Delta^{17}\text{O}$ | ‰ |         |
| -5.22                 | -2.88                 | -3.72                 |   |         |

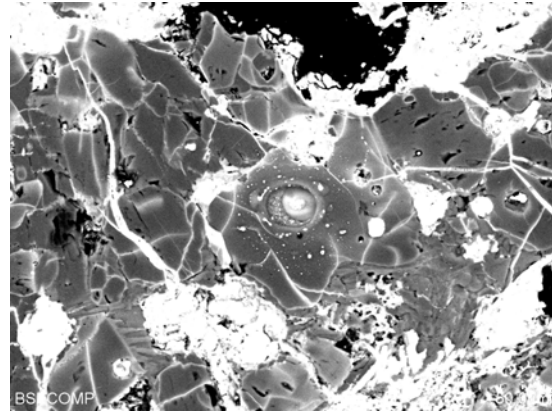

| Ch#                   | Analysis              |                       |   | Remarks |
|-----------------------|-----------------------|-----------------------|---|---------|
| <b>13</b>             | N13: 443.OI (Relict)  |                       |   |         |
| $\delta^{17}\text{O}$ | $\delta^{18}\text{O}$ | $\Delta^{17}\text{O}$ | ‰ |         |
| -2.55                 | -0.51                 | -2.28                 |   |         |

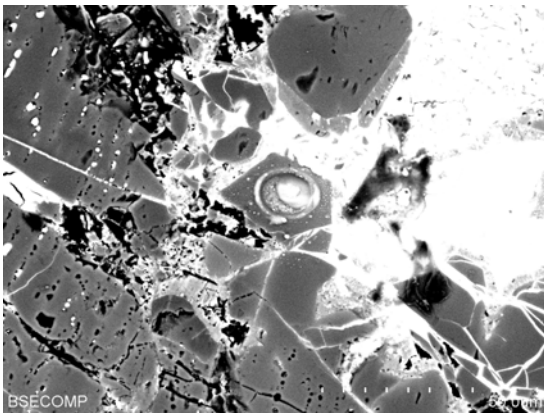

| Ch#                   | Analysis              |                       |   | Remarks |
|-----------------------|-----------------------|-----------------------|---|---------|
| <b>13</b>             | N13: 444.OI (Relict)  |                       |   |         |
| $\delta^{17}\text{O}$ | $\delta^{18}\text{O}$ | $\Delta^{17}\text{O}$ | ‰ |         |
| -2.79                 | -0.80                 | -2.37                 |   |         |

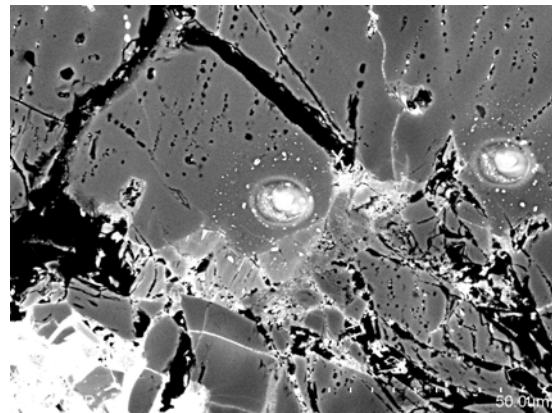

| Ch#                   | Analysis              |                       |   | Remarks |
|-----------------------|-----------------------|-----------------------|---|---------|
| <b>13</b>             | N13: 445.OI (Relict)  |                       |   |         |
| $\delta^{17}\text{O}$ | $\delta^{18}\text{O}$ | $\Delta^{17}\text{O}$ | ‰ |         |
| 1.05                  | 3.29                  | -0.67                 |   |         |

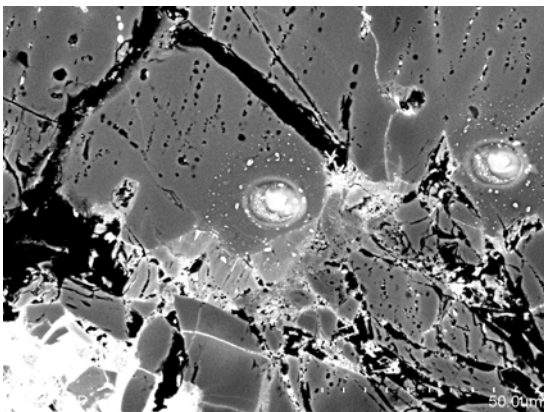

| Ch#                   | Analysis              |                       |   | Remarks |
|-----------------------|-----------------------|-----------------------|---|---------|
| <b>13</b>             | N13: 446.OI           |                       |   | CC      |
| $\delta^{17}\text{O}$ | $\delta^{18}\text{O}$ | $\Delta^{17}\text{O}$ | ‰ |         |
| -5.08                 | -3.10                 | -3.47                 |   |         |

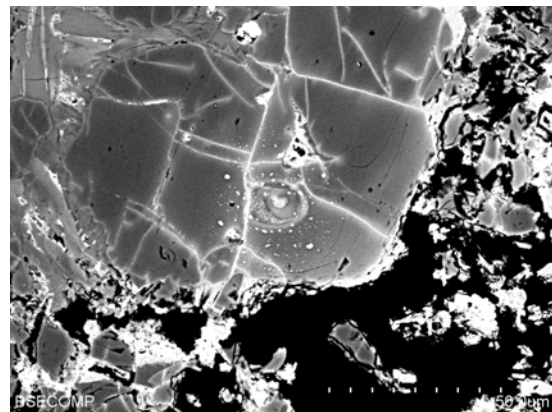

| Ch#                   | Analysis              |                       |   | Remarks |
|-----------------------|-----------------------|-----------------------|---|---------|
| <b>13</b>             | N13: 447.IntPx        |                       |   | P       |
| $\delta^{17}\text{O}$ | $\delta^{18}\text{O}$ | $\Delta^{17}\text{O}$ | ‰ |         |
| -5.68                 | -3.71                 | -3.75                 |   |         |

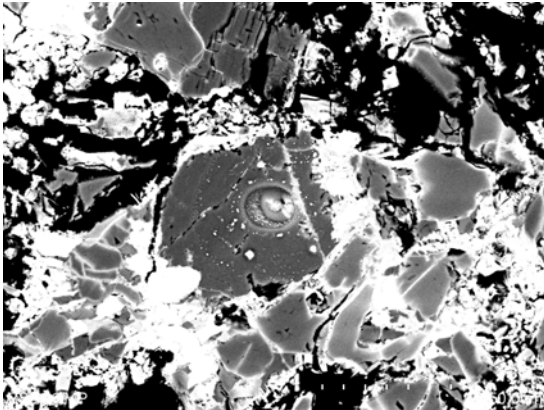

| Ch#                   | Analysis              |                       |   | Remarks |
|-----------------------|-----------------------|-----------------------|---|---------|
| <b>14</b>             | N14: 462.Lpx          |                       |   | C       |
| $\delta^{17}\text{O}$ | $\delta^{18}\text{O}$ | $\Delta^{17}\text{O}$ | ‰ |         |
| -7.71                 | -4.55                 | -5.35                 |   |         |

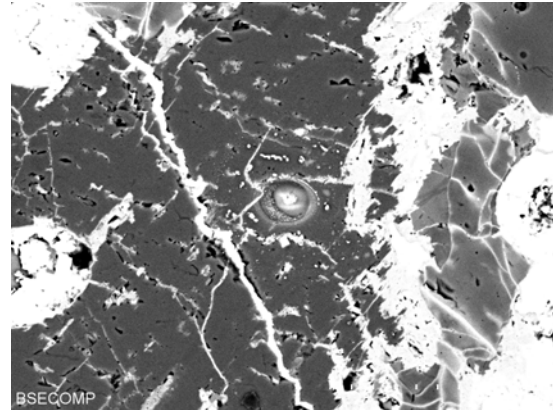

| Ch#                   | Analysis              |                       |   | Remarks |
|-----------------------|-----------------------|-----------------------|---|---------|
| <b>14</b>             | N14: 463.Lpx          |                       |   |         |
| $\delta^{17}\text{O}$ | $\delta^{18}\text{O}$ | $\Delta^{17}\text{O}$ | ‰ |         |
| -7.98                 | -4.56                 | -5.60                 |   |         |

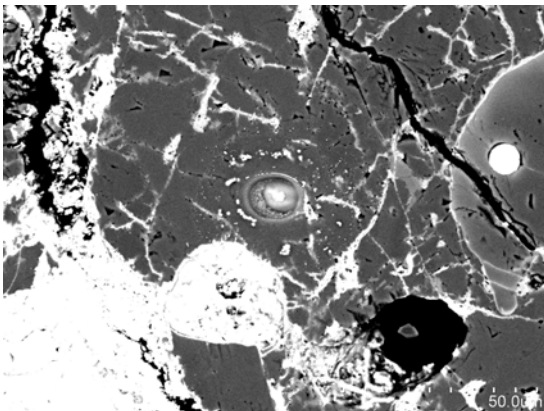

| Ch#                   | Analysis              |                       |   | Remarks |
|-----------------------|-----------------------|-----------------------|---|---------|
| <b>14</b>             | N14: 464.OI           |                       |   |         |
| $\delta^{17}\text{O}$ | $\delta^{18}\text{O}$ | $\Delta^{17}\text{O}$ | ‰ |         |
| -7.40                 | -4.44                 | -5.09                 |   |         |

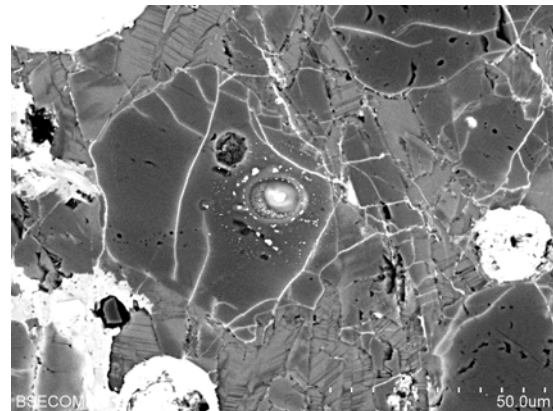

| Ch#                   | Analysis              |                       |   | Remarks |
|-----------------------|-----------------------|-----------------------|---|---------|
| <b>14</b>             | N14: 465.OI           |                       |   |         |
| $\delta^{17}\text{O}$ | $\delta^{18}\text{O}$ | $\Delta^{17}\text{O}$ | ‰ |         |
| -8.00                 | -4.84                 | -5.48                 |   |         |

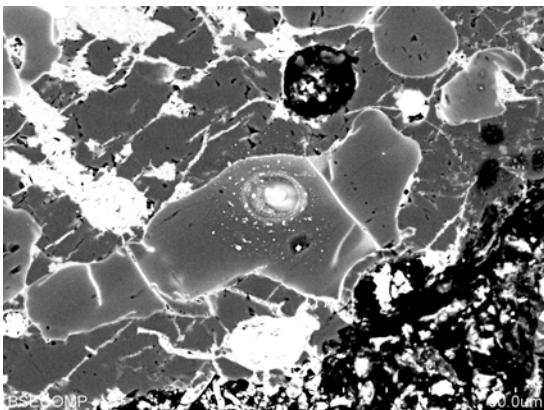

| Ch#                   | Analysis              |                       |   | Remarks |
|-----------------------|-----------------------|-----------------------|---|---------|
| <b>14</b>             | N14: 466.OI           |                       |   |         |
| $\delta^{17}\text{O}$ | $\delta^{18}\text{O}$ | $\Delta^{17}\text{O}$ | ‰ |         |
| -8.12                 | -5.12                 | -5.46                 |   |         |

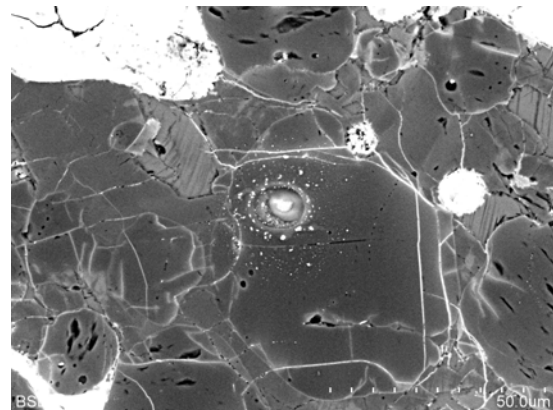

| Ch#                   | Analysis              |                       |   | Remarks |
|-----------------------|-----------------------|-----------------------|---|---------|
| <b>14</b>             | N14: 467.OI           |                       |   |         |
| $\delta^{17}\text{O}$ | $\delta^{18}\text{O}$ | $\Delta^{17}\text{O}$ | ‰ |         |
| -8.05                 | -4.70                 | -5.61                 |   |         |

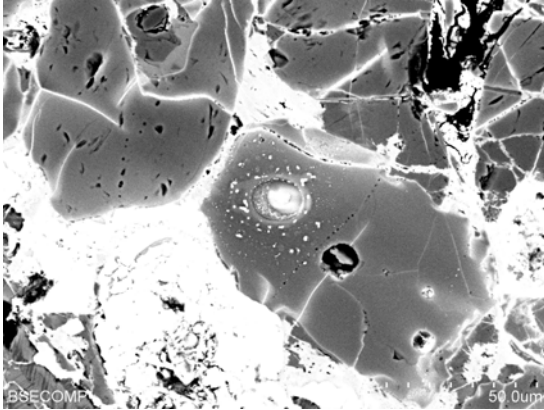

| Ch#                   | Analysis              |                       |   | Remarks |
|-----------------------|-----------------------|-----------------------|---|---------|
| <b>14</b>             | N14: 468.Lpx (Excl.)  |                       |   | CC, TP  |
| $\delta^{17}\text{O}$ | $\delta^{18}\text{O}$ | $\Delta^{17}\text{O}$ | ‰ |         |
| -4.75                 | -0.35                 | -4.57                 |   |         |

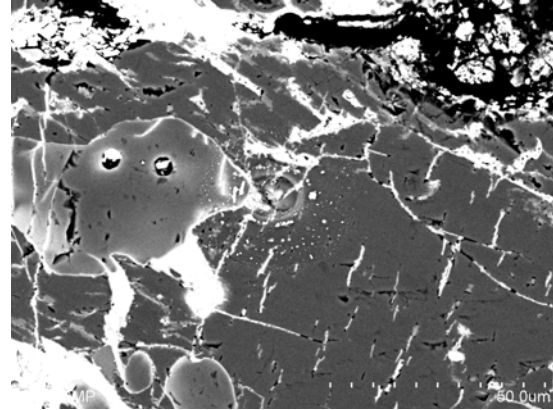

| Ch#                   | Analysis              |                       |   | Remarks |
|-----------------------|-----------------------|-----------------------|---|---------|
| <b>14</b>             | N14: 469.Lpx          |                       |   |         |
| $\delta^{17}\text{O}$ | $\delta^{18}\text{O}$ | $\Delta^{17}\text{O}$ | ‰ |         |
| -7.98                 | -4.75                 | -5.50                 |   |         |

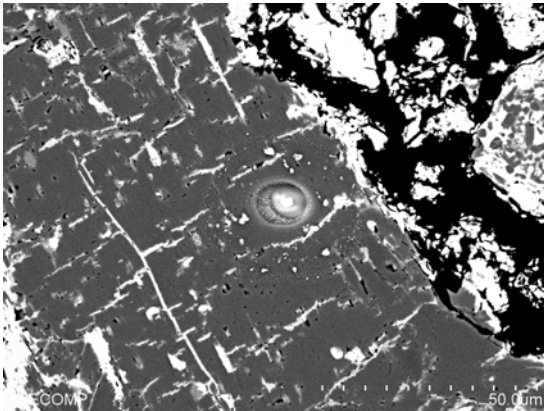

| Ch#                   | Analysis              |                       |   | Remarks |
|-----------------------|-----------------------|-----------------------|---|---------|
| <b>15</b>             | N15: 406.IntPx        |                       |   |         |
| $\delta^{17}\text{O}$ | $\delta^{18}\text{O}$ | $\Delta^{17}\text{O}$ | ‰ |         |
| 1.41                  | 3.24                  | -0.28                 |   |         |

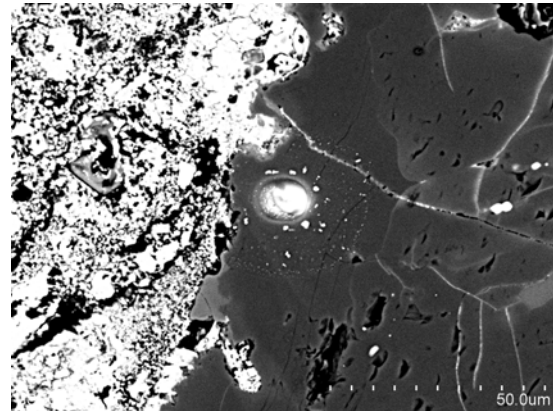

| Ch#                   | Analysis              |                       |   | Remarks |
|-----------------------|-----------------------|-----------------------|---|---------|
| <b>15</b>             | N15: 407.IntPx        |                       |   |         |
| $\delta^{17}\text{O}$ | $\delta^{18}\text{O}$ | $\Delta^{17}\text{O}$ | ‰ |         |
| 1.42                  | 3.28                  | -0.29                 |   |         |

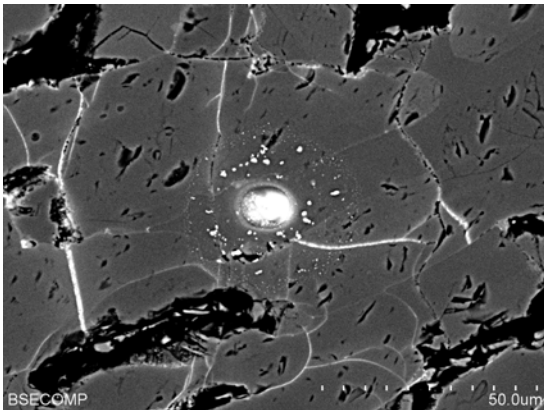

| Ch#                   | Analysis              |                       |   | Remarks |
|-----------------------|-----------------------|-----------------------|---|---------|
| <b>15</b>             | N15: 408.CaPx         |                       |   |         |
| $\delta^{17}\text{O}$ | $\delta^{18}\text{O}$ | $\Delta^{17}\text{O}$ | ‰ |         |
| 1.80                  | 3.38                  | 0.05                  |   |         |

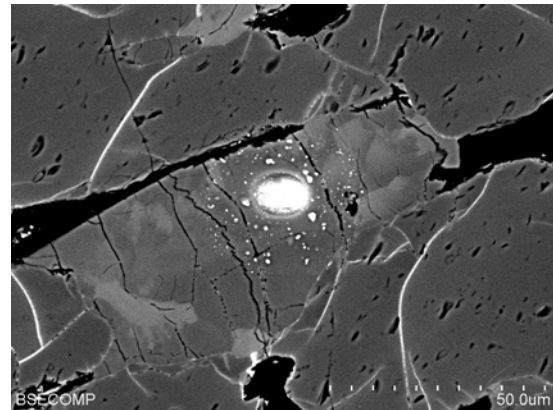

| Ch#                   | Analysis              |                       |   | Remarks |
|-----------------------|-----------------------|-----------------------|---|---------|
| <b>15</b>             | N15: 409.CaPx         |                       |   |         |
| $\delta^{17}\text{O}$ | $\delta^{18}\text{O}$ | $\Delta^{17}\text{O}$ | ‰ |         |
| 1.85                  | 3.49                  | 0.03                  |   |         |

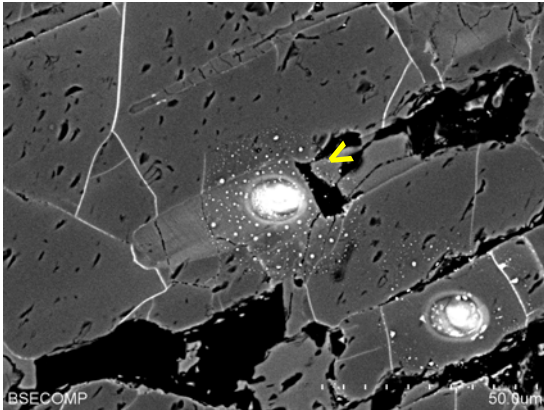

| Ch#                   | Analysis              |                       |   | Remarks |
|-----------------------|-----------------------|-----------------------|---|---------|
| <b>15</b>             | N15: 410.OI           |                       |   |         |
| $\delta^{17}\text{O}$ | $\delta^{18}\text{O}$ | $\Delta^{17}\text{O}$ | ‰ |         |
| 1.75                  | 3.52                  | -0.08                 |   |         |

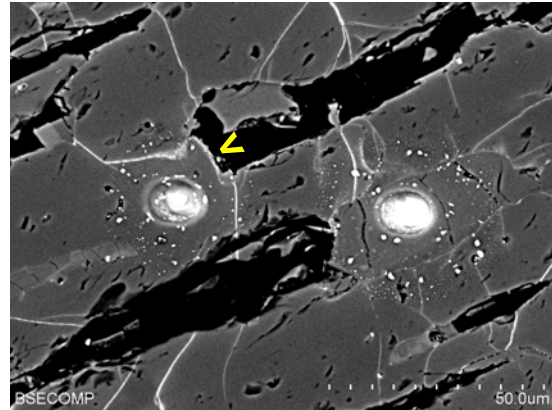

| Ch#                   | Analysis              |                       |   | Remarks |
|-----------------------|-----------------------|-----------------------|---|---------|
| <b>15</b>             | N15: 411.IntPx        |                       |   |         |
| $\delta^{17}\text{O}$ | $\delta^{18}\text{O}$ | $\Delta^{17}\text{O}$ | ‰ |         |
| 1.48                  | 3.55                  | -0.37                 |   |         |

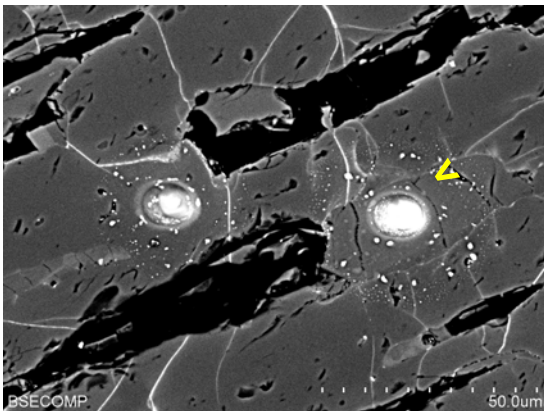

| Ch#                   | Analysis              |                       |   | Remarks |
|-----------------------|-----------------------|-----------------------|---|---------|
| <b>15</b>             | N15: 412.OI           |                       |   |         |
| $\delta^{17}\text{O}$ | $\delta^{18}\text{O}$ | $\Delta^{17}\text{O}$ | ‰ |         |
| 2.07                  | 3.41                  | 0.30                  |   |         |

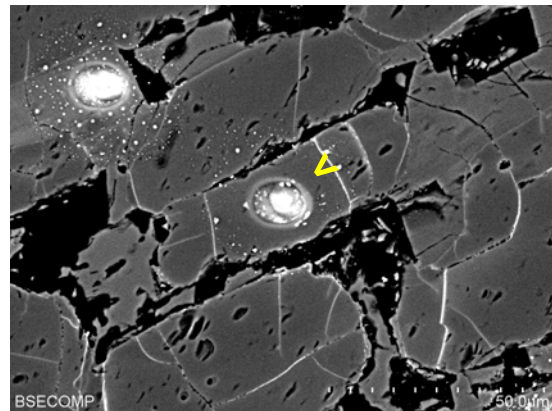

| Ch#                   | Analysis              |                       |   | Remarks |
|-----------------------|-----------------------|-----------------------|---|---------|
| <b>15</b>             | N15: 413.IntPx        |                       |   |         |
| $\delta^{17}\text{O}$ | $\delta^{18}\text{O}$ | $\Delta^{17}\text{O}$ | ‰ |         |
| 1.67                  | 3.45                  | -0.13                 |   |         |

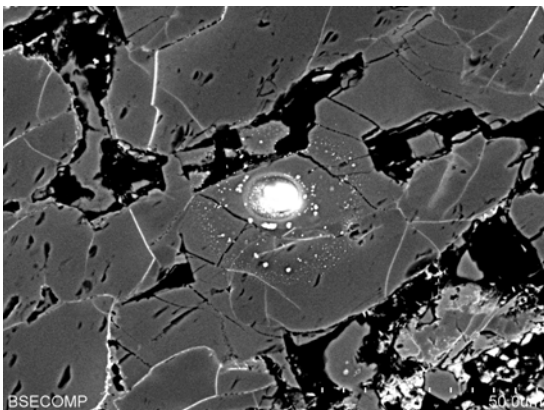

| Ch#                   | Analysis              |                       |   | Remarks |
|-----------------------|-----------------------|-----------------------|---|---------|
| <b>15</b>             | N15: 414.OI           |                       |   | C       |
| $\delta^{17}\text{O}$ | $\delta^{18}\text{O}$ | $\Delta^{17}\text{O}$ | ‰ |         |
| 1.83                  | 3.65                  | -0.07                 |   |         |

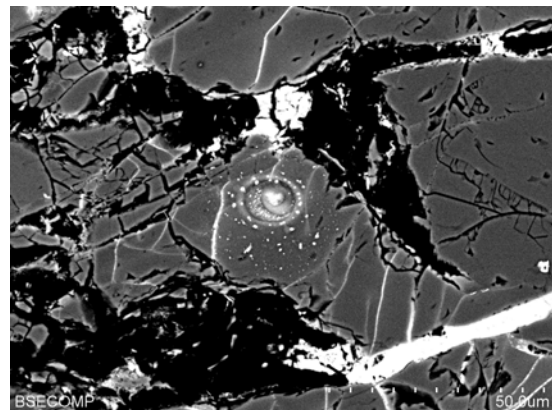

| Ch#                   | Analysis              |                       |   | Remarks |
|-----------------------|-----------------------|-----------------------|---|---------|
| <b>15</b>             | N15: 415.IntPx        |                       |   |         |
| $\delta^{17}\text{O}$ | $\delta^{18}\text{O}$ | $\Delta^{17}\text{O}$ | ‰ |         |
| 1.58                  | 3.18                  | -0.08                 |   |         |

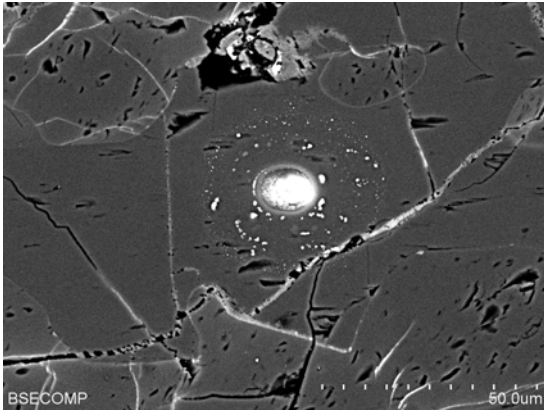

| Ch#                   | Analysis              |                       |   | Remarks |
|-----------------------|-----------------------|-----------------------|---|---------|
| <b>16</b>             | N16: 470.OI           |                       |   |         |
| $\delta^{17}\text{O}$ | $\delta^{18}\text{O}$ | $\Delta^{17}\text{O}$ | ‰ |         |
| -1.18                 | 2.37                  | -2.42                 |   |         |

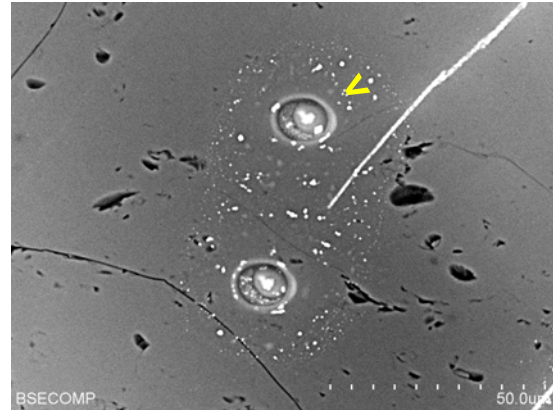

| Ch#                   | Analysis              |                       |   | Remarks |
|-----------------------|-----------------------|-----------------------|---|---------|
| <b>16</b>             | N16: 471.OI           |                       |   |         |
| $\delta^{17}\text{O}$ | $\delta^{18}\text{O}$ | $\Delta^{17}\text{O}$ | ‰ |         |
| -1.02                 | 2.53                  | -2.33                 |   |         |

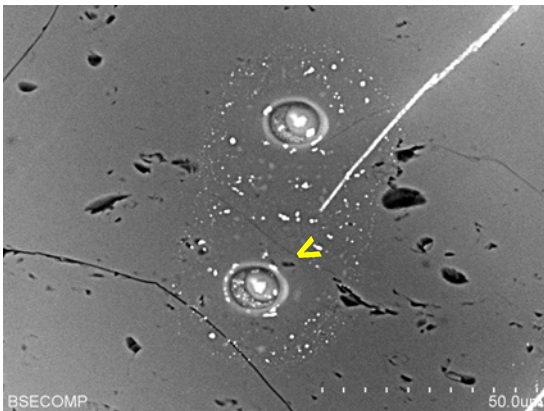

| Ch#                   | Analysis              |                       |   | Remarks |
|-----------------------|-----------------------|-----------------------|---|---------|
| <b>16</b>             | N16: 472.OI           |                       |   |         |
| $\delta^{17}\text{O}$ | $\delta^{18}\text{O}$ | $\Delta^{17}\text{O}$ | ‰ |         |
| -0.99                 | 2.28                  | -2.18                 |   |         |

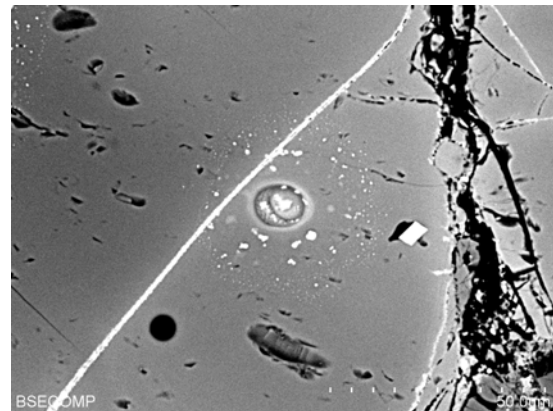

| Ch#                   | Analysis              |                       |   | Remarks |
|-----------------------|-----------------------|-----------------------|---|---------|
| <b>16</b>             | N16: 473.OI (Relict)  |                       |   |         |
| $\delta^{17}\text{O}$ | $\delta^{18}\text{O}$ | $\Delta^{17}\text{O}$ | ‰ |         |
| -1.03                 | 3.51                  | -2.86                 |   |         |

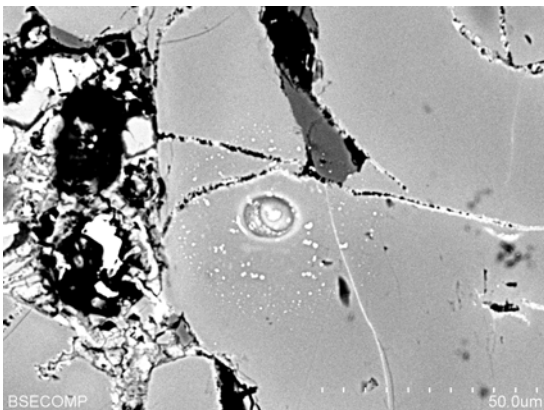

| Ch#                   | Analysis              |                       |   | Remarks |
|-----------------------|-----------------------|-----------------------|---|---------|
| <b>16</b>             | N16: 474.OI (Relict)  |                       |   |         |
| $\delta^{17}\text{O}$ | $\delta^{18}\text{O}$ | $\Delta^{17}\text{O}$ | ‰ |         |
| -1.12                 | 4.60                  | -3.51                 |   |         |

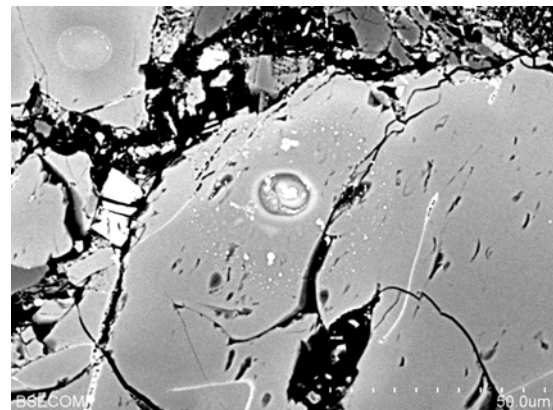



| Ch#                   | Analysis              |                       |   | Remarks |
|-----------------------|-----------------------|-----------------------|---|---------|
| <b>16</b>             | N16: 475.OI (Excl.)   |                       |   |         |
| $\delta^{17}\text{O}$ | $\delta^{18}\text{O}$ | $\Delta^{17}\text{O}$ | ‰ |         |
| -6.35                 | 4.91                  | -8.90                 |   |         |

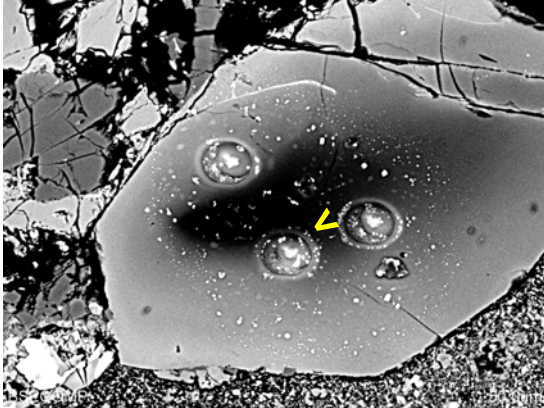

| Ch#                   | Analysis              |                       |   | Remarks |
|-----------------------|-----------------------|-----------------------|---|---------|
| <b>16</b>             | N16: 476.OI           |                       |   |         |
| $\delta^{17}\text{O}$ | $\delta^{18}\text{O}$ | $\Delta^{17}\text{O}$ | ‰ |         |
| -1.34                 | 1.63                  | -2.19                 |   |         |

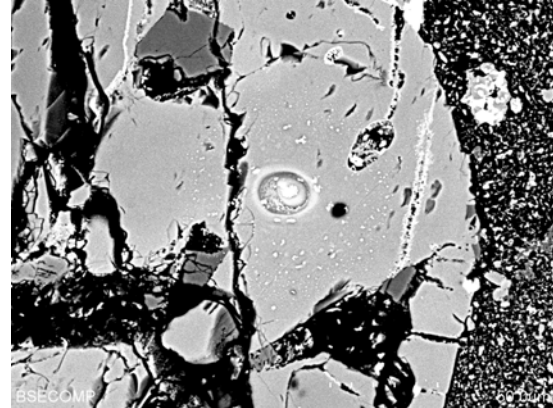

| Ch#                   | Analysis              |                       |   | Remarks |
|-----------------------|-----------------------|-----------------------|---|---------|
| <b>16</b>             | N16: 477.OI (Relict)  |                       |   |         |
| $\delta^{17}\text{O}$ | $\delta^{18}\text{O}$ | $\Delta^{17}\text{O}$ | ‰ |         |
| -7.62                 | -4.66                 | -5.20                 |   |         |

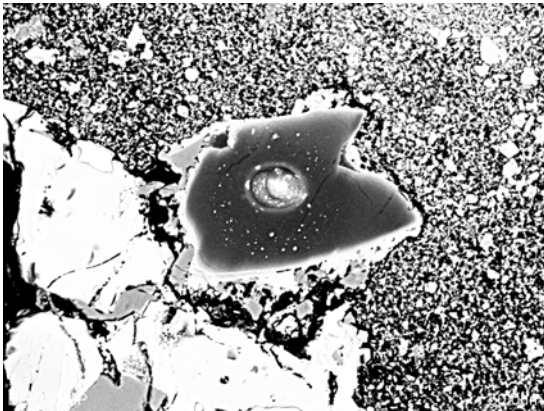

| Ch#                   | Analysis              |                       |   | Remarks |
|-----------------------|-----------------------|-----------------------|---|---------|
| <b>16</b>             | N16: 478.OI (Excl.)   |                       |   |         |
| $\delta^{17}\text{O}$ | $\delta^{18}\text{O}$ | $\Delta^{17}\text{O}$ | ‰ |         |
| -2.14                 | 0.78                  | -2.55                 |   |         |

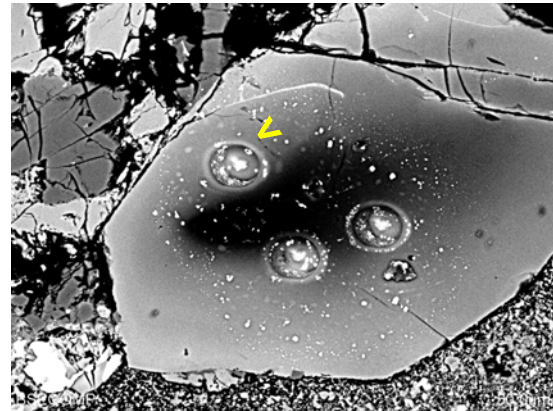

| Ch#                   | Analysis              |                       |   | Remarks |
|-----------------------|-----------------------|-----------------------|---|---------|
| <b>16</b>             | N16: 479.OI (Relict)  |                       |   |         |
| $\delta^{17}\text{O}$ | $\delta^{18}\text{O}$ | $\Delta^{17}\text{O}$ | ‰ |         |
| -6.22                 | -3.13                 | -4.59                 |   |         |

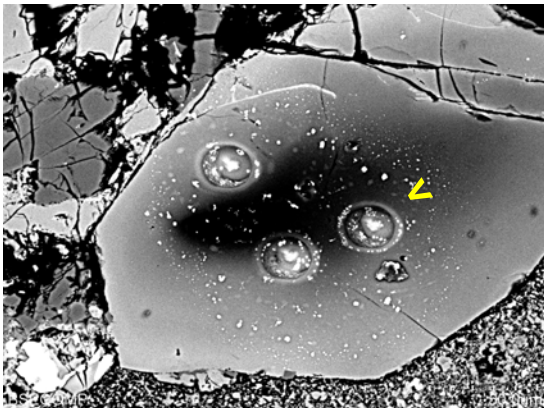

| Ch#                   | Analysis              |                       |   | Remarks |
|-----------------------|-----------------------|-----------------------|---|---------|
| <b>17</b>             | N17: 427.Lpx          |                       |   |         |
| $\delta^{17}\text{O}$ | $\delta^{18}\text{O}$ | $\Delta^{17}\text{O}$ | ‰ |         |
| -6.24                 | -3.31                 | -4.52                 |   |         |

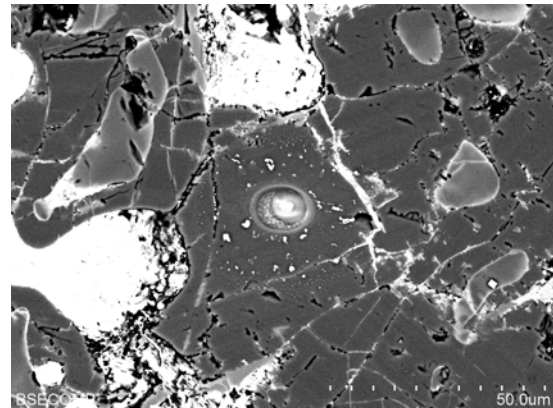

| Ch#                   | Analysis              |                       |   | Remarks |
|-----------------------|-----------------------|-----------------------|---|---------|
| 17                    | N17: 428.OI           |                       |   |         |
| $\delta^{17}\text{O}$ | $\delta^{18}\text{O}$ | $\Delta^{17}\text{O}$ | ‰ |         |
| -6.18                 | -2.93                 | -4.65                 |   |         |

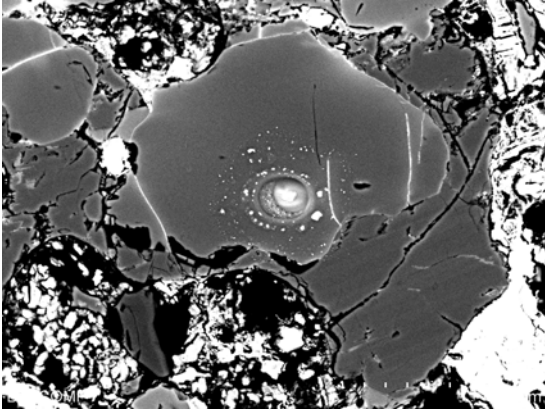

| Ch#                   | Analysis              |                       |   | Remarks |
|-----------------------|-----------------------|-----------------------|---|---------|
| 17                    | N17: 429.CaPx (Excl.P |                       |   |         |
| $\delta^{17}\text{O}$ | $\delta^{18}\text{O}$ | $\Delta^{17}\text{O}$ | ‰ |         |
| -7.49                 | -3.09                 | -5.88                 |   |         |

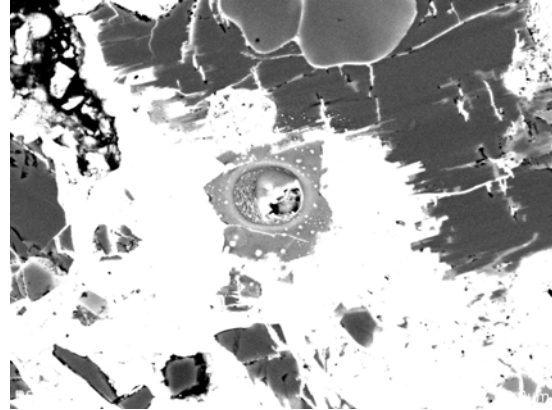

| Ch#                   | Analysis              |                       |   | Remarks |
|-----------------------|-----------------------|-----------------------|---|---------|
| 17                    | N17: 430.Lpx          |                       |   |         |
| $\delta^{17}\text{O}$ | $\delta^{18}\text{O}$ | $\Delta^{17}\text{O}$ | ‰ |         |
| -6.36                 | -3.65                 | -4.47                 |   |         |

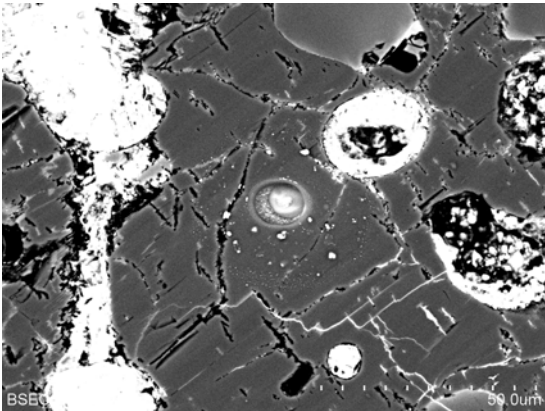

| Ch#                   | Analysis              |                       |   | Remarks |
|-----------------------|-----------------------|-----------------------|---|---------|
| 17                    | N17: 431.OI (Relict)  |                       |   |         |
| $\delta^{17}\text{O}$ | $\delta^{18}\text{O}$ | $\Delta^{17}\text{O}$ | ‰ |         |
| -31.86                | -29.61                | -16.46                |   |         |

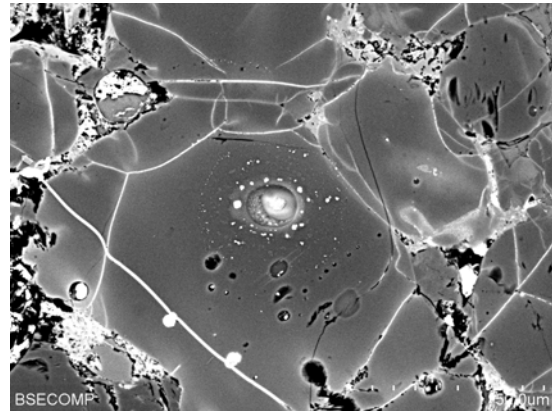

| Ch#                   | Analysis              |                       |   | Remarks |
|-----------------------|-----------------------|-----------------------|---|---------|
| 17                    | N17: 432.OI (Relict)  |                       |   |         |
| $\delta^{17}\text{O}$ | $\delta^{18}\text{O}$ | $\Delta^{17}\text{O}$ | ‰ |         |
| -7.78                 | -4.49                 | -5.45                 |   |         |

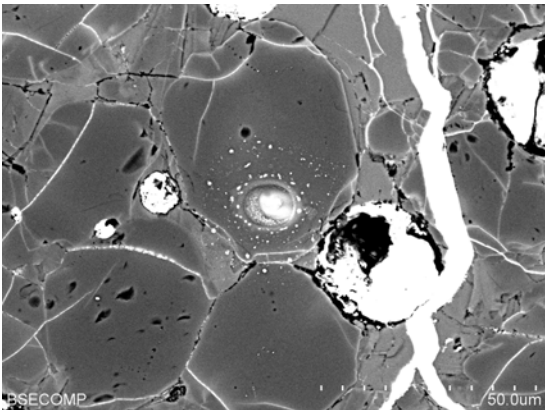

| Ch#                   | Analysis              |                       |   | Remarks |
|-----------------------|-----------------------|-----------------------|---|---------|
| 17                    | N17: 433.OI           |                       |   |         |
| $\delta^{17}\text{O}$ | $\delta^{18}\text{O}$ | $\Delta^{17}\text{O}$ | ‰ |         |
| -6.66                 | -3.52                 | -4.83                 |   |         |

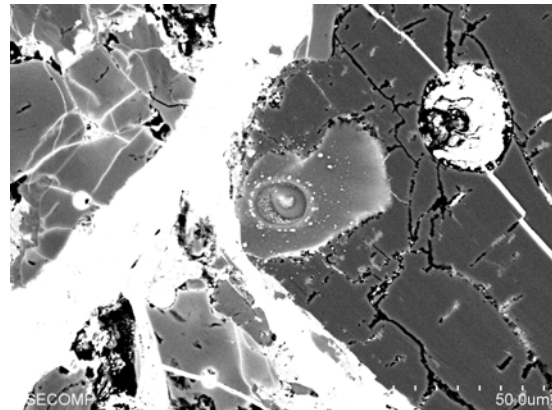

| Ch#                   | Analysis              |                       |   | Remarks |
|-----------------------|-----------------------|-----------------------|---|---------|
| <b>17</b>             | N17: 434.Lpx          |                       |   |         |
| $\delta^{17}\text{O}$ | $\delta^{18}\text{O}$ | $\Delta^{17}\text{O}$ | ‰ |         |
| -6.43                 | -3.52                 | -4.61                 |   |         |

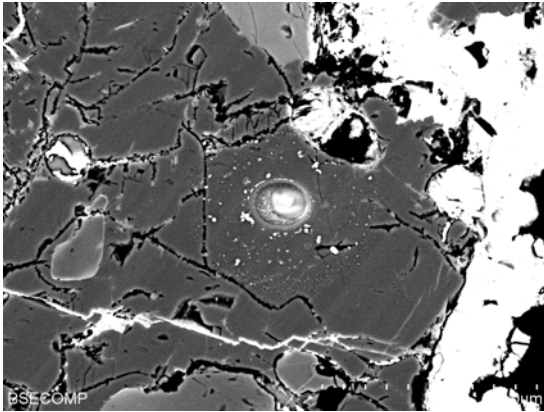

| Ch#                   | Analysis              |                       |   | Remarks |
|-----------------------|-----------------------|-----------------------|---|---------|
| <b>17</b>             | N17: 435.Lpx          |                       |   |         |
| $\delta^{17}\text{O}$ | $\delta^{18}\text{O}$ | $\Delta^{17}\text{O}$ | ‰ |         |
| -6.02                 | -3.11                 | -4.41                 |   |         |

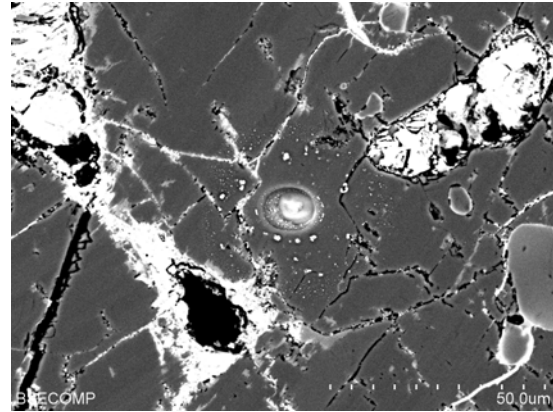

| Ch#                   | Analysis              |                       |   | Remarks |
|-----------------------|-----------------------|-----------------------|---|---------|
| <b>17</b>             | N17: 436.OI           |                       |   |         |
| $\delta^{17}\text{O}$ | $\delta^{18}\text{O}$ | $\Delta^{17}\text{O}$ | ‰ |         |
| -5.41                 | -2.34                 | -4.19                 |   |         |

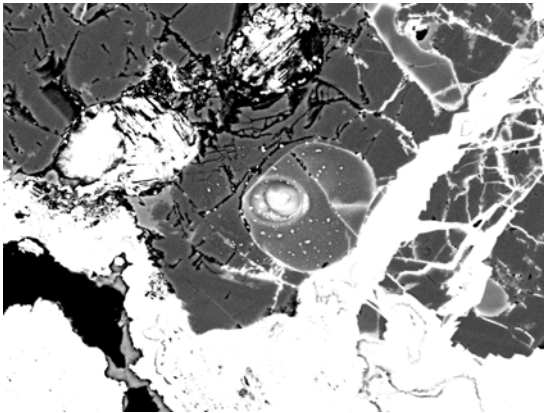

| Ch#                   | Analysis              |                       |   | Remarks |
|-----------------------|-----------------------|-----------------------|---|---------|
| <b>18</b>             | N18: 484.Lpx          |                       |   |         |
| $\delta^{17}\text{O}$ | $\delta^{18}\text{O}$ | $\Delta^{17}\text{O}$ | ‰ |         |
| -6.44                 | -3.55                 | -4.59                 |   |         |

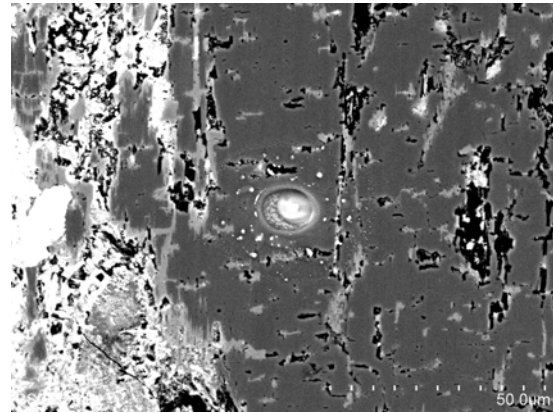

| Ch#                   | Analysis              |                       |   | Remarks |
|-----------------------|-----------------------|-----------------------|---|---------|
| <b>18</b>             | N18: 485.Lpx          |                       |   |         |
| $\delta^{17}\text{O}$ | $\delta^{18}\text{O}$ | $\Delta^{17}\text{O}$ | ‰ |         |
| -6.26                 | -3.55                 | -4.42                 |   |         |

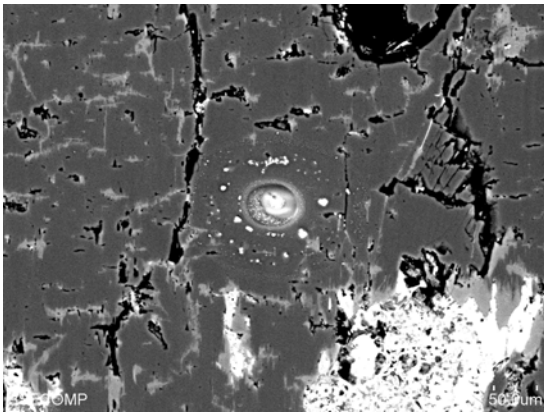

| Ch#                   | Analysis              |                       |   | Remarks |
|-----------------------|-----------------------|-----------------------|---|---------|
| <b>18</b>             | N18: 486.OI           |                       |   |         |
| $\delta^{17}\text{O}$ | $\delta^{18}\text{O}$ | $\Delta^{17}\text{O}$ | ‰ |         |
| -6.34                 | -3.28                 | -4.63                 |   |         |

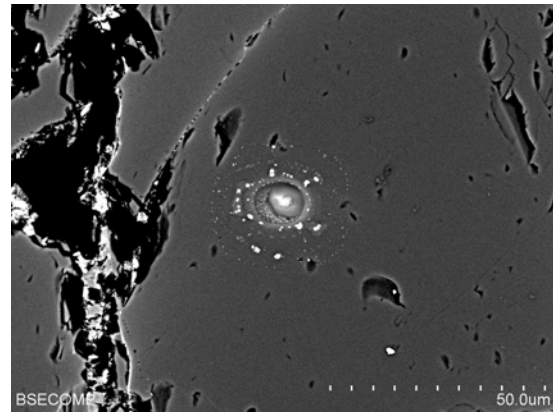

| Ch#                   | Analysis              |                       |   | Remarks |
|-----------------------|-----------------------|-----------------------|---|---------|
| <b>18</b>             | N18: 487.Lpx          |                       |   |         |
| $\delta^{17}\text{O}$ | $\delta^{18}\text{O}$ | $\Delta^{17}\text{O}$ | ‰ |         |
| -6.42                 | -3.75                 | -4.47                 |   |         |

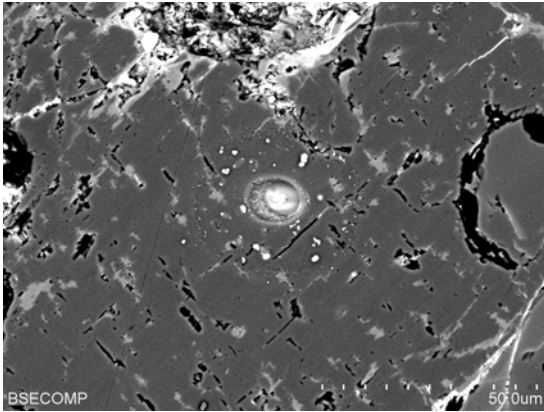

| Ch#                   | Analysis              |                       |   | Remarks |
|-----------------------|-----------------------|-----------------------|---|---------|
| <b>18</b>             | N18: 488.OI           |                       |   |         |
| $\delta^{17}\text{O}$ | $\delta^{18}\text{O}$ | $\Delta^{17}\text{O}$ | ‰ |         |
| -6.33                 | -3.51                 | -4.50                 |   |         |

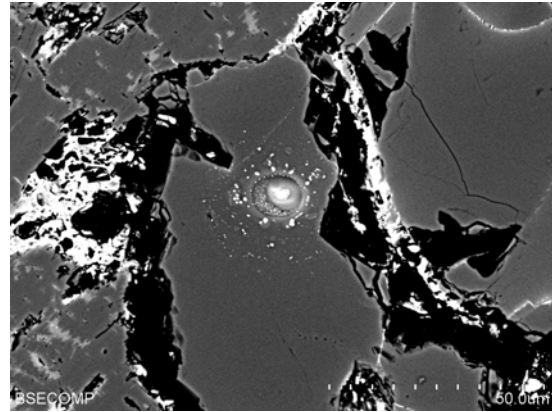

| Ch#                   | Analysis              |                       |   | Remarks |
|-----------------------|-----------------------|-----------------------|---|---------|
| <b>18</b>             | N18: 489.OI           |                       |   |         |
| $\delta^{17}\text{O}$ | $\delta^{18}\text{O}$ | $\Delta^{17}\text{O}$ | ‰ |         |
| -6.45                 | -3.28                 | -4.74                 |   |         |

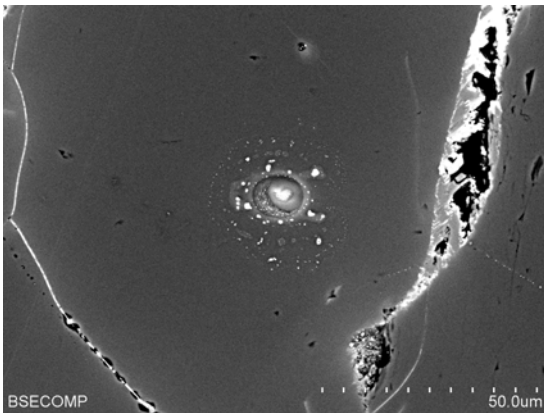

| Ch#                   | Analysis              |                       |   | Remarks |
|-----------------------|-----------------------|-----------------------|---|---------|
| <b>18</b>             | N18: 490.OI           |                       |   |         |
| $\delta^{17}\text{O}$ | $\delta^{18}\text{O}$ | $\Delta^{17}\text{O}$ | ‰ |         |
| -6.52                 | -3.38                 | -4.76                 |   |         |

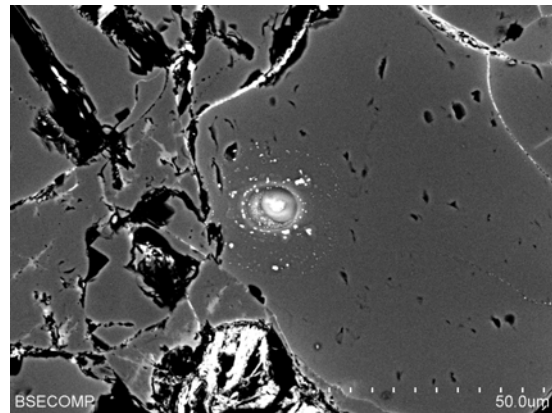

| Ch#                   | Analysis              |                       |   | Remarks |
|-----------------------|-----------------------|-----------------------|---|---------|
| <b>18</b>             | N18: 491.Lpx          |                       |   |         |
| $\delta^{17}\text{O}$ | $\delta^{18}\text{O}$ | $\Delta^{17}\text{O}$ | ‰ |         |
| -6.82                 | -4.07                 | -4.71                 |   |         |

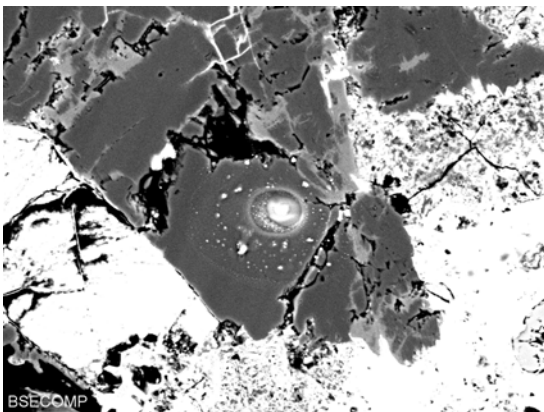

| Ch#                   | Analysis              |                       |   | Remarks |
|-----------------------|-----------------------|-----------------------|---|---------|
| <b>19</b>             | N19: 492.Lpx          |                       |   |         |
| $\delta^{17}\text{O}$ | $\delta^{18}\text{O}$ | $\Delta^{17}\text{O}$ | ‰ |         |
| -9.24                 | -6.39                 | -5.92                 |   |         |

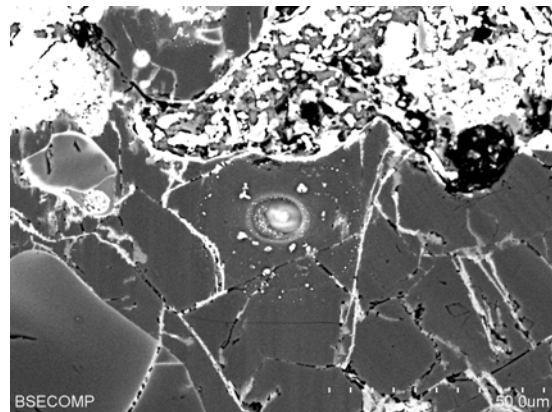

| Ch#                   | Analysis              |                       |   | Remarks |
|-----------------------|-----------------------|-----------------------|---|---------|
| <b>19</b>             | N19: 493.OI           |                       |   |         |
| $\delta^{17}\text{O}$ | $\delta^{18}\text{O}$ | $\Delta^{17}\text{O}$ | ‰ |         |
| -9.13                 | -6.03                 | -5.99                 |   |         |

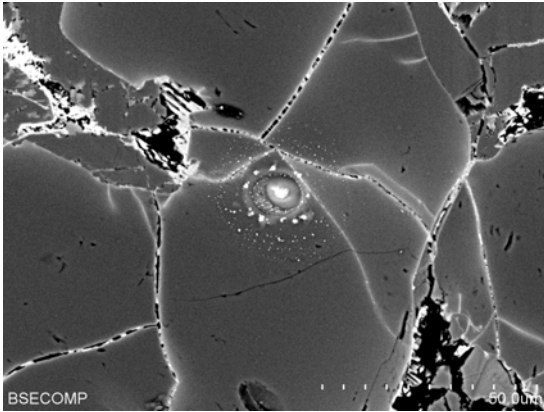

| Ch#                   | Analysis              |                       |   | Remarks |
|-----------------------|-----------------------|-----------------------|---|---------|
| <b>19</b>             | N19: 494.OI           |                       |   |         |
| $\delta^{17}\text{O}$ | $\delta^{18}\text{O}$ | $\Delta^{17}\text{O}$ | ‰ |         |
| -9.59                 | -6.29                 | -6.32                 |   |         |

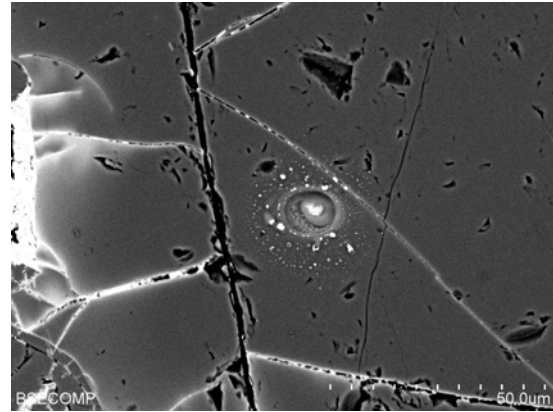

| Ch#                   | Analysis              |                       |   | Remarks |
|-----------------------|-----------------------|-----------------------|---|---------|
| <b>19</b>             | N19: 495.OI           |                       |   |         |
| $\delta^{17}\text{O}$ | $\delta^{18}\text{O}$ | $\Delta^{17}\text{O}$ | ‰ |         |
| -9.09                 | -6.16                 | -5.88                 |   |         |

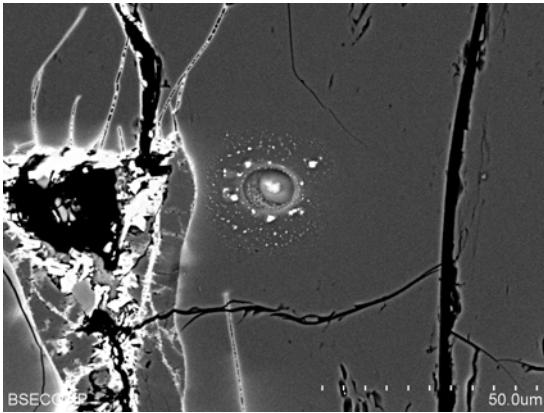

| Ch#                   | Analysis              |                       |   | Remarks |
|-----------------------|-----------------------|-----------------------|---|---------|
| <b>19</b>             | N19: 496.Lpx          |                       |   |         |
| $\delta^{17}\text{O}$ | $\delta^{18}\text{O}$ | $\Delta^{17}\text{O}$ | ‰ |         |
| -9.02                 | -6.23                 | -5.77                 |   |         |

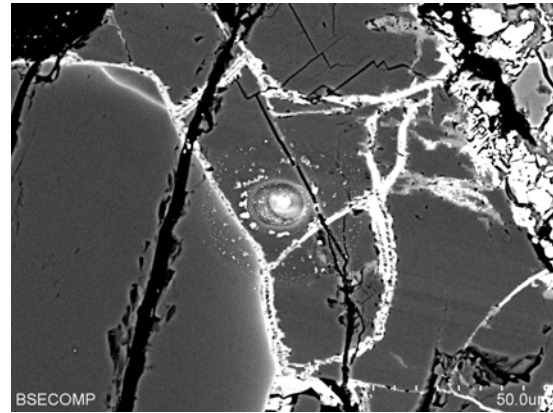

| Ch#                   | Analysis              |                       |   | Remarks |
|-----------------------|-----------------------|-----------------------|---|---------|
| <b>19</b>             | N19: 497.OI           |                       |   | U       |
| $\delta^{17}\text{O}$ | $\delta^{18}\text{O}$ | $\Delta^{17}\text{O}$ | ‰ |         |
| -8.85                 | -5.73                 | -5.86                 |   |         |

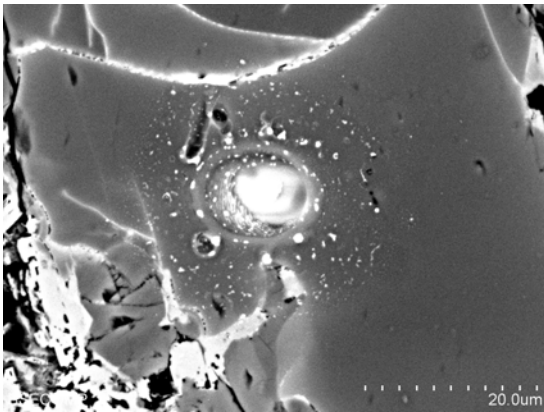

| Ch#                   | Analysis              |                       |   | Remarks |
|-----------------------|-----------------------|-----------------------|---|---------|
| <b>19</b>             | N19: 498.Lpx          |                       |   | CC      |
| $\delta^{17}\text{O}$ | $\delta^{18}\text{O}$ | $\Delta^{17}\text{O}$ | ‰ |         |
| -8.56                 | -5.81                 | -5.54                 |   |         |

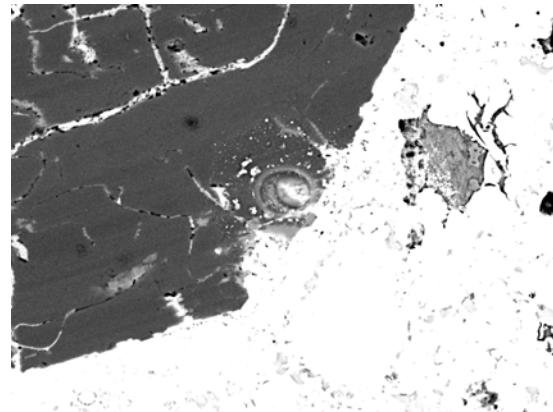

| Ch#                   | Analysis              |                       |   | Remarks |
|-----------------------|-----------------------|-----------------------|---|---------|
| <b>19</b>             | N19: 499.Lpx          |                       |   |         |
| $\delta^{17}\text{O}$ | $\delta^{18}\text{O}$ | $\Delta^{17}\text{O}$ | ‰ |         |
| -8.99                 | -6.36                 | -5.69                 |   |         |

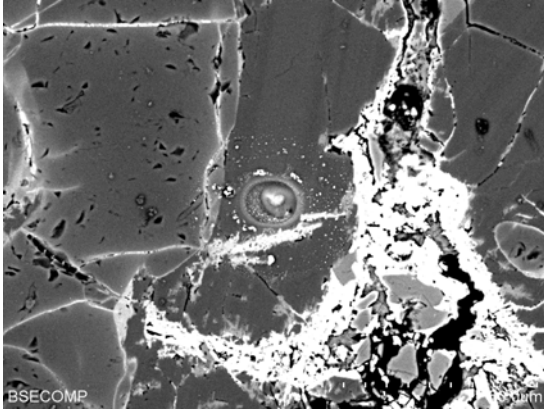

| Ch#                   | Analysis              |                       |   | Remarks |
|-----------------------|-----------------------|-----------------------|---|---------|
| <b>20</b>             | N20: 506.OI           |                       |   |         |
| $\delta^{17}\text{O}$ | $\delta^{18}\text{O}$ | $\Delta^{17}\text{O}$ | ‰ |         |
| -10.42                | -7.37                 | -6.59                 |   |         |

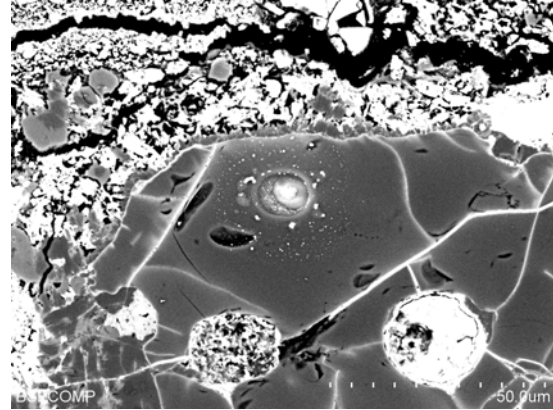

| Ch#                   | Analysis              |                       |   | Remarks |
|-----------------------|-----------------------|-----------------------|---|---------|
| <b>20</b>             | N20: 507.OI           |                       |   |         |
| $\delta^{17}\text{O}$ | $\delta^{18}\text{O}$ | $\Delta^{17}\text{O}$ | ‰ |         |
| -10.47                | -7.44                 | -6.60                 |   |         |

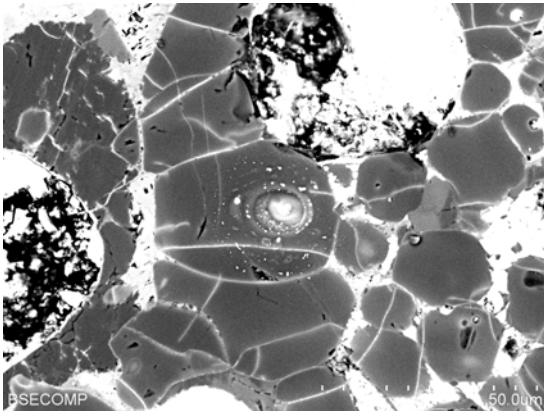

| Ch#                   | Analysis              |                       |   | Remarks |
|-----------------------|-----------------------|-----------------------|---|---------|
| <b>20</b>             | N20: 508.Lpx          |                       |   |         |
| $\delta^{17}\text{O}$ | $\delta^{18}\text{O}$ | $\Delta^{17}\text{O}$ | ‰ |         |
| -10.93                | -7.76                 | -6.89                 |   |         |

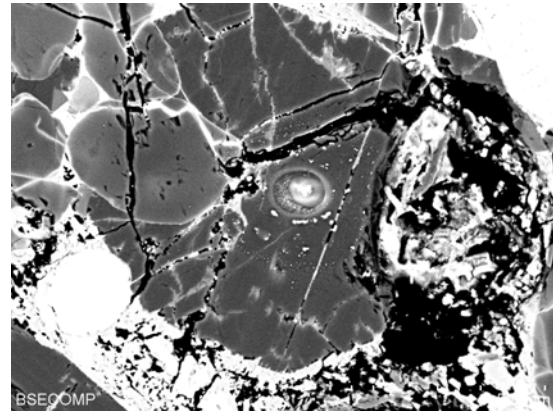

| Ch#                   | Analysis              |                       |   | Remarks |
|-----------------------|-----------------------|-----------------------|---|---------|
| <b>20</b>             | N20: 509.Lpx          |                       |   |         |
| $\delta^{17}\text{O}$ | $\delta^{18}\text{O}$ | $\Delta^{17}\text{O}$ | ‰ |         |
| -10.64                | -7.59                 | -6.69                 |   |         |

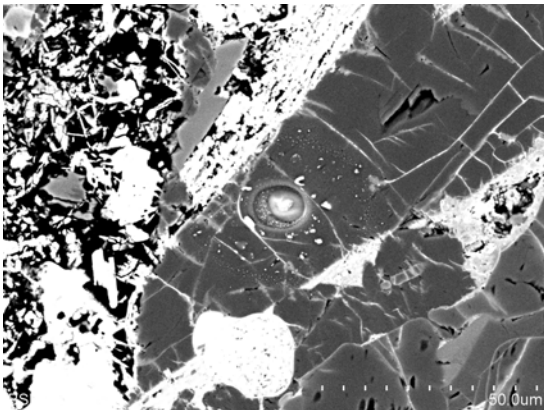

| Ch#                   | Analysis              |                       |   | Remarks |
|-----------------------|-----------------------|-----------------------|---|---------|
| <b>20</b>             | N20: 510.Lpx          |                       |   |         |
| $\delta^{17}\text{O}$ | $\delta^{18}\text{O}$ | $\Delta^{17}\text{O}$ | ‰ |         |
| -10.66                | -7.49                 | -6.76                 |   |         |

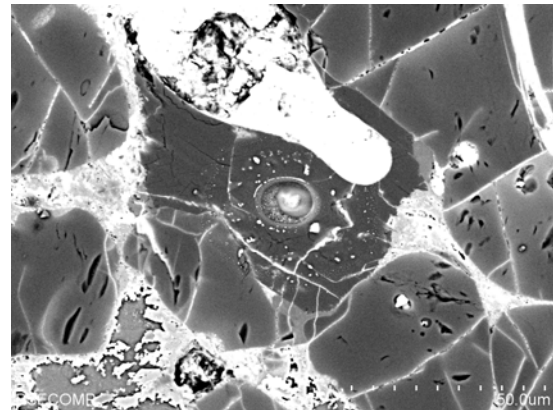

| Ch#                   | Analysis              |                       |   | Remarks |
|-----------------------|-----------------------|-----------------------|---|---------|
| <b>20</b>             | N20: 511.OI           |                       |   |         |
| $\delta^{17}\text{O}$ | $\delta^{18}\text{O}$ | $\Delta^{17}\text{O}$ | ‰ |         |
| -10.32                | -7.31                 | -6.51                 |   |         |

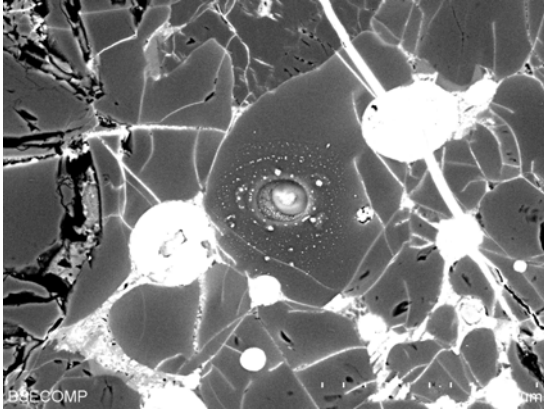

| Ch#                   | Analysis              |                       |   | Remarks |
|-----------------------|-----------------------|-----------------------|---|---------|
| <b>20</b>             | N20: 512.Lpx          |                       |   |         |
| $\delta^{17}\text{O}$ | $\delta^{18}\text{O}$ | $\Delta^{17}\text{O}$ | ‰ |         |
| -10.57                | -7.91                 | -6.46                 |   |         |

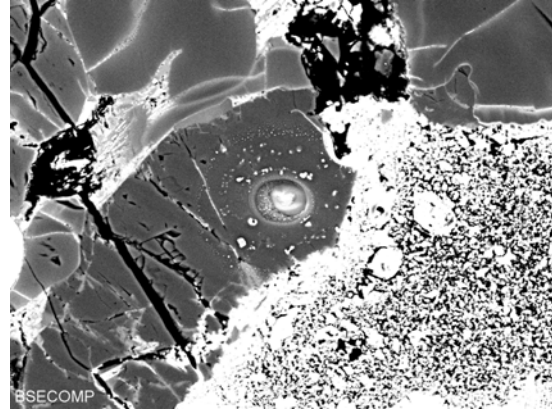

| Ch#                   | Analysis              |                       |   | Remarks |
|-----------------------|-----------------------|-----------------------|---|---------|
| <b>20</b>             | N20: 513.OI           |                       |   |         |
| $\delta^{17}\text{O}$ | $\delta^{18}\text{O}$ | $\Delta^{17}\text{O}$ | ‰ |         |
| -10.27                | -7.17                 | -6.54                 |   |         |

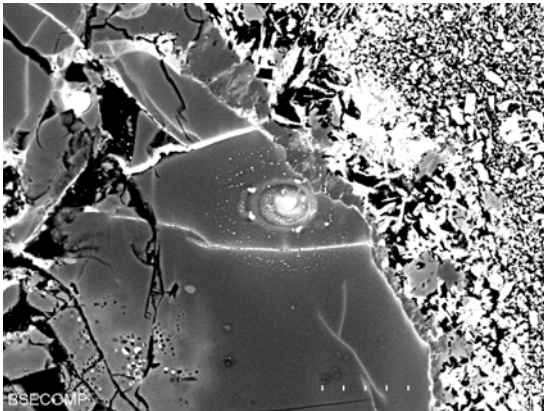

| Ch#                   | Analysis              |                       |   | Remarks |
|-----------------------|-----------------------|-----------------------|---|---------|
| <b>21</b>             | N21: 514.OI           |                       |   |         |
| $\delta^{17}\text{O}$ | $\delta^{18}\text{O}$ | $\Delta^{17}\text{O}$ | ‰ |         |
| -7.79                 | -4.48                 | -5.46                 |   |         |

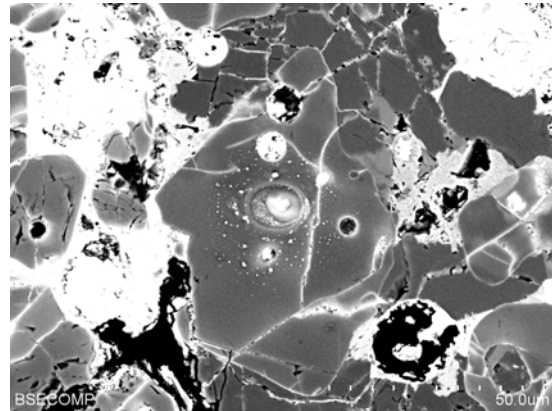

| Ch#                   | Analysis              |                       |   | Remarks |
|-----------------------|-----------------------|-----------------------|---|---------|
| <b>21</b>             | N21: 515.Lpx          |                       |   | C       |
| $\delta^{17}\text{O}$ | $\delta^{18}\text{O}$ | $\Delta^{17}\text{O}$ | ‰ |         |
| -7.96                 | -4.49                 | -5.63                 |   |         |

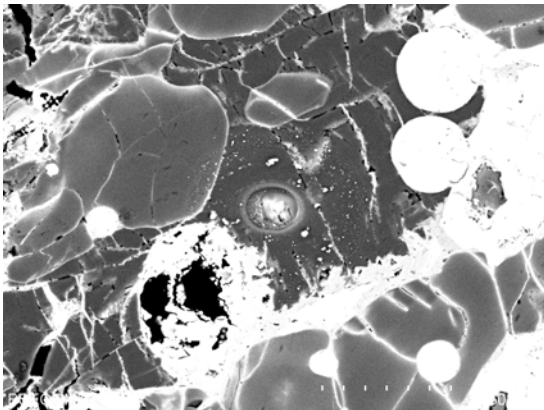

| Ch#                   | Analysis              |                       |   | Remarks |
|-----------------------|-----------------------|-----------------------|---|---------|
| <b>21</b>             | N21: 516.OI           |                       |   |         |
| $\delta^{17}\text{O}$ | $\delta^{18}\text{O}$ | $\Delta^{17}\text{O}$ | ‰ |         |
| -7.99                 | -4.70                 | -5.55                 |   |         |

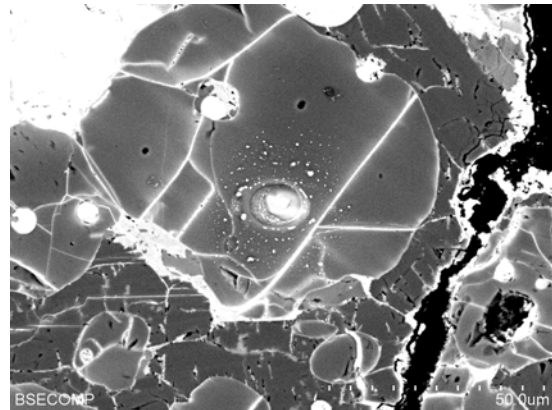

| Ch#                   | Analysis              |                       |   | Remarks |
|-----------------------|-----------------------|-----------------------|---|---------|
| <b>21</b>             | N21: 517.OI           |                       |   | U       |
| $\delta^{17}\text{O}$ | $\delta^{18}\text{O}$ | $\Delta^{17}\text{O}$ | ‰ |         |
| -7.86                 | -4.61                 | -5.47                 |   |         |

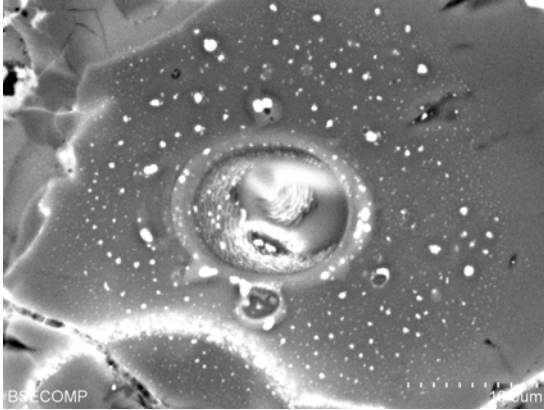

| Ch#                   | Analysis              |                       |   | Remarks |
|-----------------------|-----------------------|-----------------------|---|---------|
| <b>21</b>             | N21: 518.IntPx        |                       |   |         |
| $\delta^{17}\text{O}$ | $\delta^{18}\text{O}$ | $\Delta^{17}\text{O}$ | ‰ |         |
| -8.09                 | -4.88                 | -5.55                 |   |         |

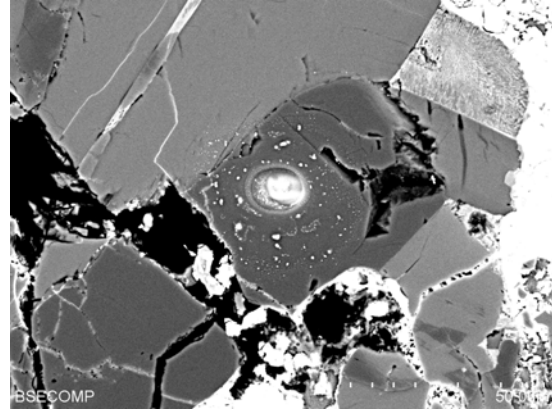

| Ch#                   | Analysis              |                       |   | Remarks |
|-----------------------|-----------------------|-----------------------|---|---------|
| <b>21</b>             | N21: 519.OI           |                       |   |         |
| $\delta^{17}\text{O}$ | $\delta^{18}\text{O}$ | $\Delta^{17}\text{O}$ | ‰ |         |
| -8.03                 | -4.49                 | -5.70                 |   |         |

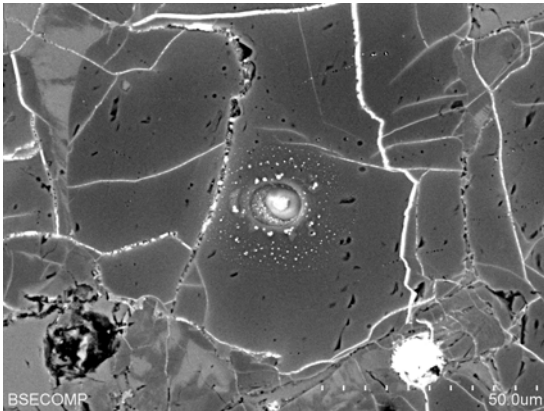

| Ch#                   | Analysis              |                       |   | Remarks |
|-----------------------|-----------------------|-----------------------|---|---------|
| <b>21</b>             | N21: 520.Lpx          |                       |   |         |
| $\delta^{17}\text{O}$ | $\delta^{18}\text{O}$ | $\Delta^{17}\text{O}$ | ‰ |         |
| -7.81                 | -4.62                 | -5.41                 |   |         |

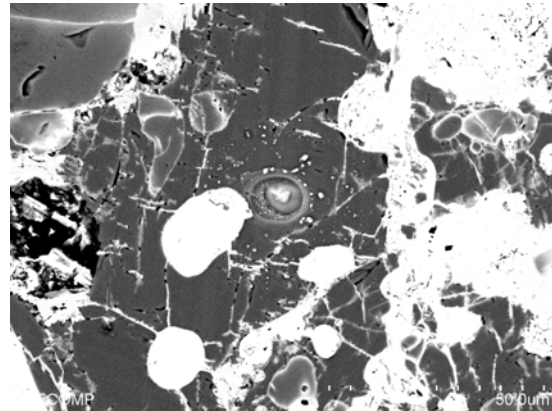

| Ch#                   | Analysis              |                       |   | Remarks |
|-----------------------|-----------------------|-----------------------|---|---------|
| <b>21</b>             | N21: 521.Lpx          |                       |   |         |
| $\delta^{17}\text{O}$ | $\delta^{18}\text{O}$ | $\Delta^{17}\text{O}$ | ‰ |         |
| -7.98                 | -4.80                 | -5.48                 |   |         |

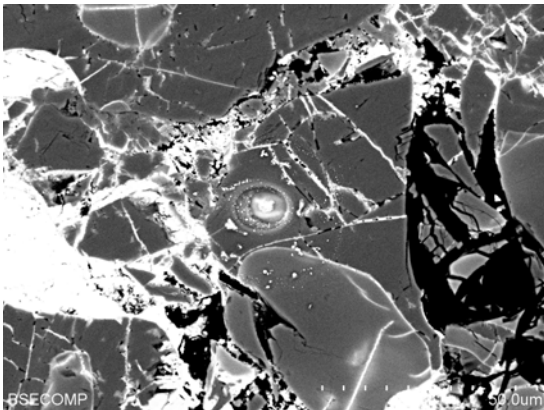

| Ch#                   | Analysis              |                       |   | Remarks |
|-----------------------|-----------------------|-----------------------|---|---------|
| <b>22</b>             | N22: 526.IntPx        |                       |   |         |
| $\delta^{17}\text{O}$ | $\delta^{18}\text{O}$ | $\Delta^{17}\text{O}$ | ‰ |         |
| -8.27                 | -4.85                 | -5.75                 |   |         |

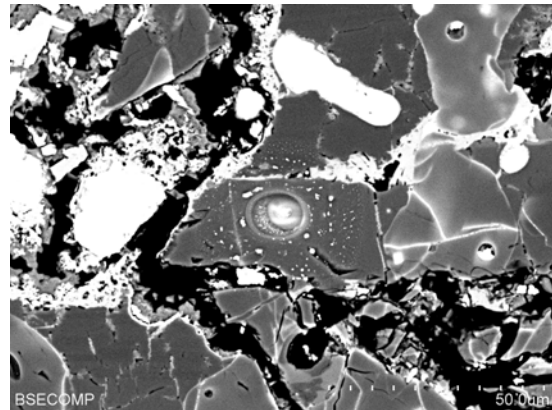



| Ch#                   | Analysis              |                       |   | Remarks |
|-----------------------|-----------------------|-----------------------|---|---------|
| <b>22</b>             | N22: 527.Lpx          |                       |   |         |
| $\delta^{17}\text{O}$ | $\delta^{18}\text{O}$ | $\Delta^{17}\text{O}$ | ‰ |         |
| -8.26                 | -4.74                 | -5.80                 |   |         |

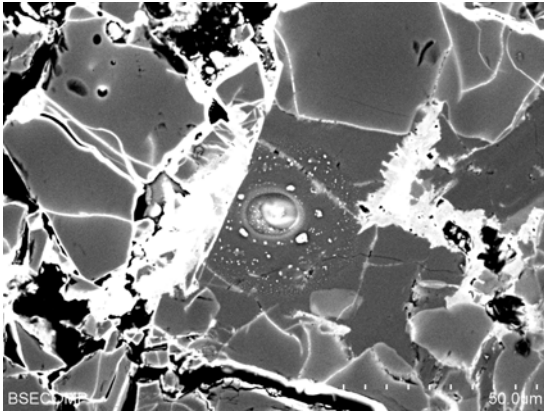

| Ch#                   | Analysis              |                       |   | Remarks |
|-----------------------|-----------------------|-----------------------|---|---------|
| <b>22</b>             | N22: 528.OI           |                       |   |         |
| $\delta^{17}\text{O}$ | $\delta^{18}\text{O}$ | $\Delta^{17}\text{O}$ | ‰ |         |
| -8.02                 | -4.60                 | -5.62                 |   |         |

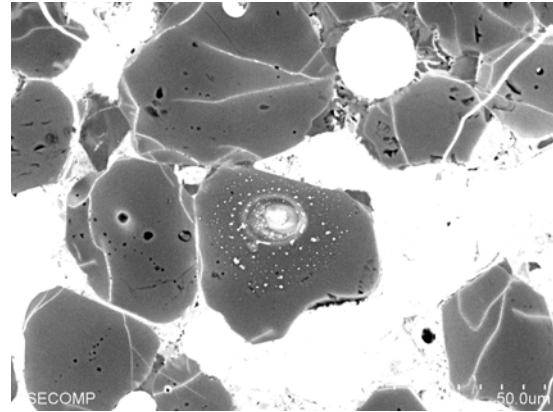

| Ch#                   | Analysis              |                       |   | Remarks |
|-----------------------|-----------------------|-----------------------|---|---------|
| <b>22</b>             | N22: 529.OI           |                       |   |         |
| $\delta^{17}\text{O}$ | $\delta^{18}\text{O}$ | $\Delta^{17}\text{O}$ | ‰ |         |
| -7.80                 | -4.26                 | -5.59                 |   |         |

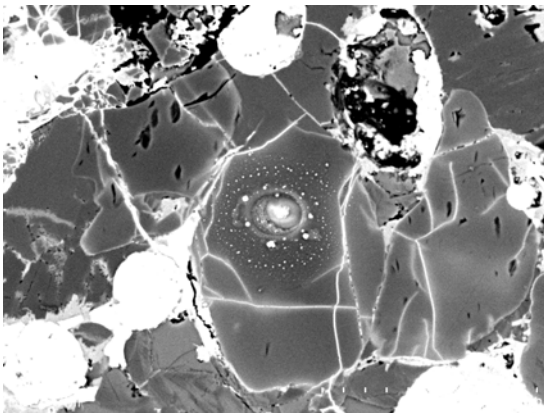

| Ch#                   | Analysis              |                       |   | Remarks |
|-----------------------|-----------------------|-----------------------|---|---------|
| <b>22</b>             | N22: 530.OI           |                       |   |         |
| $\delta^{17}\text{O}$ | $\delta^{18}\text{O}$ | $\Delta^{17}\text{O}$ | ‰ |         |
| -7.87                 | -3.94                 | -5.82                 |   |         |

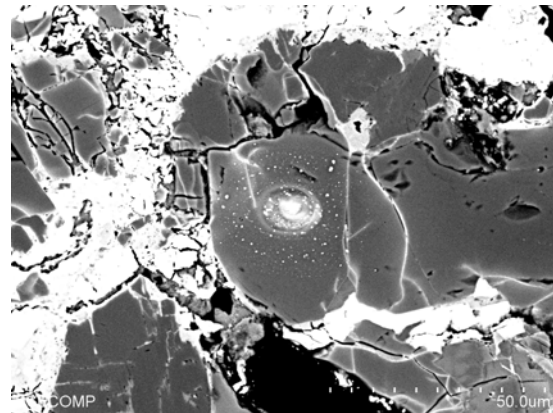

| Ch#                   | Analysis              |                       |   | Remarks |
|-----------------------|-----------------------|-----------------------|---|---------|
| <b>22</b>             | N22: 531.OI           |                       |   |         |
| $\delta^{17}\text{O}$ | $\delta^{18}\text{O}$ | $\Delta^{17}\text{O}$ | ‰ |         |
| -8.12                 | -4.11                 | -5.98                 |   |         |

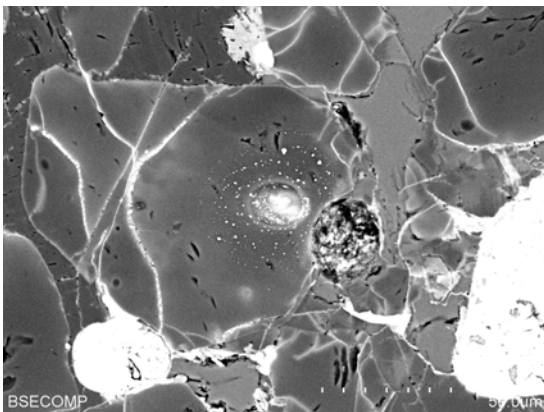

| Ch#                   | Analysis              |                       |   | Remarks |
|-----------------------|-----------------------|-----------------------|---|---------|
| <b>22</b>             | N22: 532.IntPx        |                       |   |         |
| $\delta^{17}\text{O}$ | $\delta^{18}\text{O}$ | $\Delta^{17}\text{O}$ | ‰ |         |
| -8.18                 | -4.79                 | -5.69                 |   |         |

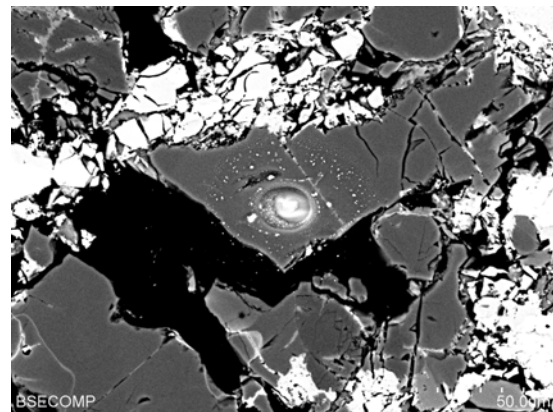

| Ch#                   | Analysis              |                       |   | Remarks |
|-----------------------|-----------------------|-----------------------|---|---------|
| <b>22</b>             | N22: 533.Lpx          |                       |   |         |
| $\delta^{17}\text{O}$ | $\delta^{18}\text{O}$ | $\Delta^{17}\text{O}$ | ‰ |         |
| -8.37                 | -4.67                 | -5.94                 |   |         |

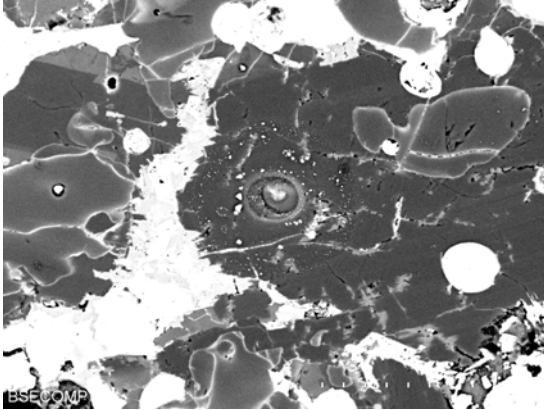

| Ch#                   | Analysis              |                       |   | Remarks |
|-----------------------|-----------------------|-----------------------|---|---------|
| <b>23</b>             | N23: 534.Lpx          |                       |   |         |
| $\delta^{17}\text{O}$ | $\delta^{18}\text{O}$ | $\Delta^{17}\text{O}$ | ‰ |         |
| -6.46                 | -3.51                 | -4.64                 |   |         |

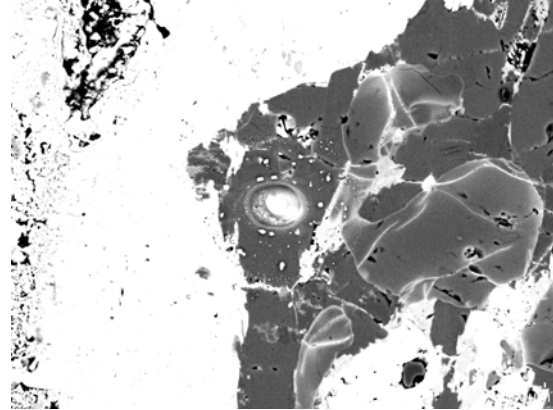

| Ch#                   | Analysis              |                       |   | Remarks |
|-----------------------|-----------------------|-----------------------|---|---------|
| <b>23</b>             | N23: 535.OI           |                       |   |         |
| $\delta^{17}\text{O}$ | $\delta^{18}\text{O}$ | $\Delta^{17}\text{O}$ | ‰ |         |
| -6.42                 | -2.43                 | -5.16                 |   |         |

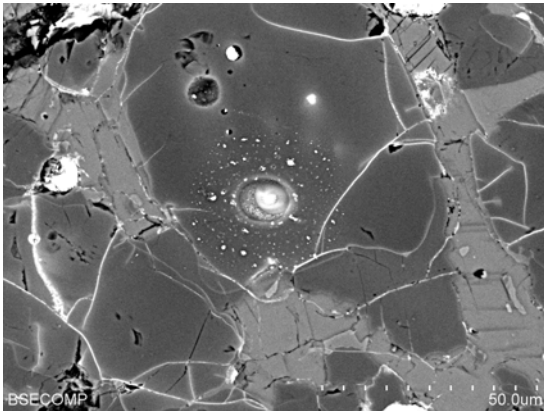

| Ch#                   | Analysis              |                       |   | Remarks |
|-----------------------|-----------------------|-----------------------|---|---------|
| <b>23</b>             | N23: 536.OI           |                       |   |         |
| $\delta^{17}\text{O}$ | $\delta^{18}\text{O}$ | $\Delta^{17}\text{O}$ | ‰ |         |
| -6.61                 | -3.37                 | -4.85                 |   |         |

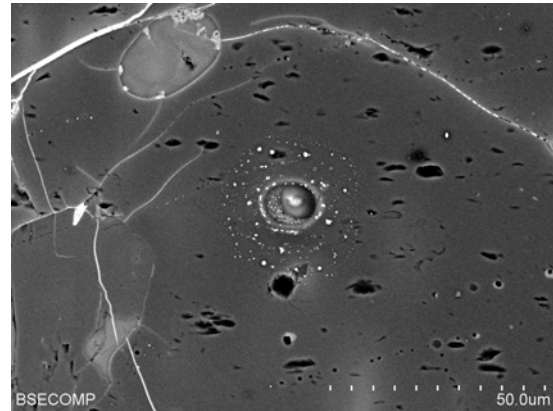

| Ch#                   | Analysis              |                       |   | Remarks |
|-----------------------|-----------------------|-----------------------|---|---------|
| <b>23</b>             | N23: 537.OI           |                       |   |         |
| $\delta^{17}\text{O}$ | $\delta^{18}\text{O}$ | $\Delta^{17}\text{O}$ | ‰ |         |
| -6.49                 | -3.60                 | -4.62                 |   |         |

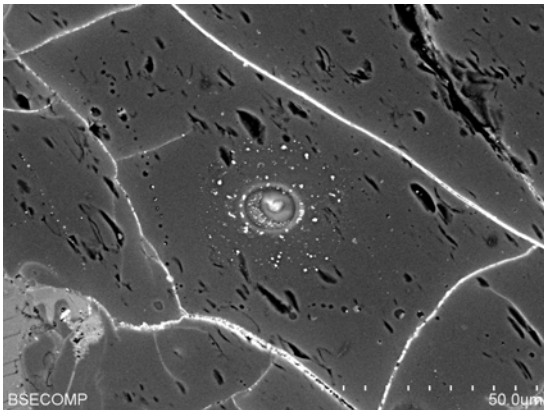

| Ch#                   | Analysis              |                       |   | Remarks |
|-----------------------|-----------------------|-----------------------|---|---------|
| <b>23</b>             | N23: 538.OI           |                       |   |         |
| $\delta^{17}\text{O}$ | $\delta^{18}\text{O}$ | $\Delta^{17}\text{O}$ | ‰ |         |
| -6.48                 | -3.39                 | -4.72                 |   |         |

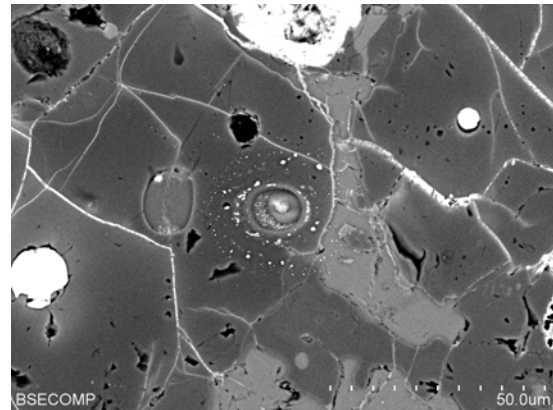

| Ch#                   | Analysis              |                       |   | Remarks |
|-----------------------|-----------------------|-----------------------|---|---------|
| <b>23</b>             | N23: 539.IntPx        |                       |   |         |
| $\delta^{17}\text{O}$ | $\delta^{18}\text{O}$ | $\Delta^{17}\text{O}$ | ‰ |         |
| -6.48                 | -3.44                 | -4.69                 |   |         |

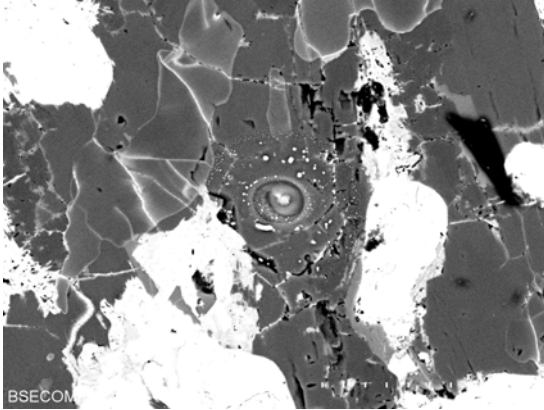

| Ch#                   | Analysis              |                       |   | Remarks |
|-----------------------|-----------------------|-----------------------|---|---------|
| <b>23</b>             | N23: 540.Lpx          |                       |   |         |
| $\delta^{17}\text{O}$ | $\delta^{18}\text{O}$ | $\Delta^{17}\text{O}$ | ‰ |         |
| -6.51                 | -3.26                 | -4.81                 |   |         |

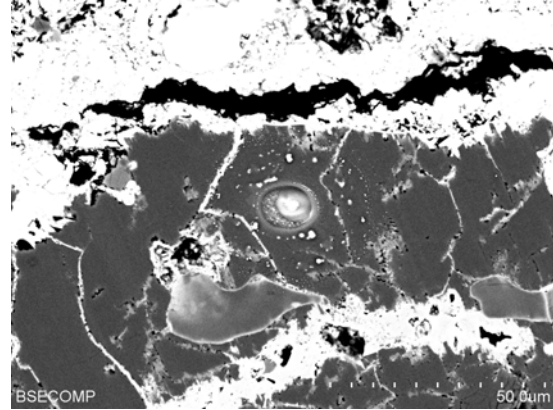

| Ch#                   | Analysis              |                       |   | Remarks |
|-----------------------|-----------------------|-----------------------|---|---------|
| <b>23</b>             | N23: 541.IntPx        |                       |   |         |
| $\delta^{17}\text{O}$ | $\delta^{18}\text{O}$ | $\Delta^{17}\text{O}$ | ‰ |         |
| -6.04                 | -2.97                 | -4.50                 |   |         |

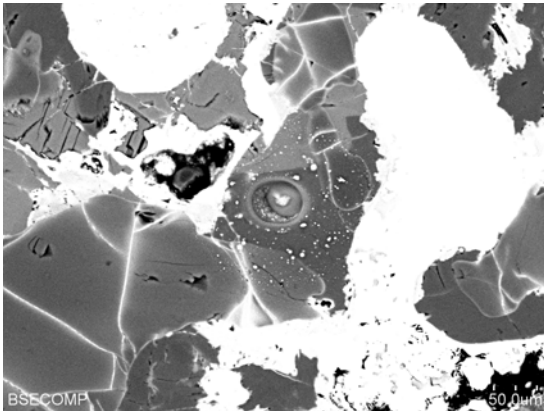

| Ch#                   | Analysis              |                       |   | Remarks |
|-----------------------|-----------------------|-----------------------|---|---------|
| <b>24</b>             | N24: 546.OI           |                       |   |         |
| $\delta^{17}\text{O}$ | $\delta^{18}\text{O}$ | $\Delta^{17}\text{O}$ | ‰ |         |
| -9.61                 | -6.69                 | -6.13                 |   |         |

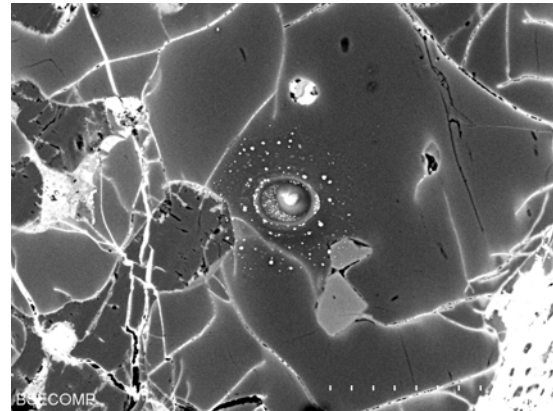

| Ch#                   | Analysis              |                       |   | Remarks |
|-----------------------|-----------------------|-----------------------|---|---------|
| <b>24</b>             | N24: 547.OI           |                       |   |         |
| $\delta^{17}\text{O}$ | $\delta^{18}\text{O}$ | $\Delta^{17}\text{O}$ | ‰ |         |
| -9.98                 | -6.64                 | -6.53                 |   |         |

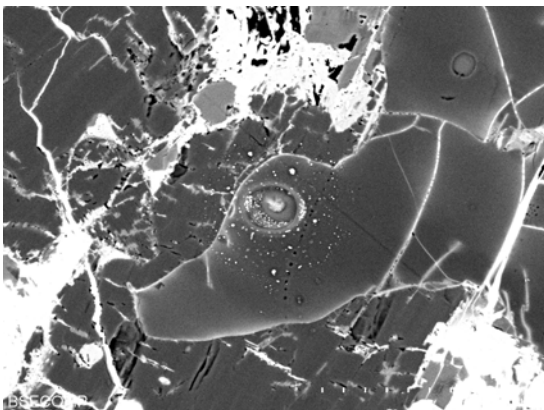

| Ch#                   | Analysis              |                       |   | Remarks |
|-----------------------|-----------------------|-----------------------|---|---------|
| <b>24</b>             | N24: 548.Lpx          |                       |   |         |
| $\delta^{17}\text{O}$ | $\delta^{18}\text{O}$ | $\Delta^{17}\text{O}$ | ‰ |         |
| -9.41                 | -6.52                 | -6.02                 |   |         |

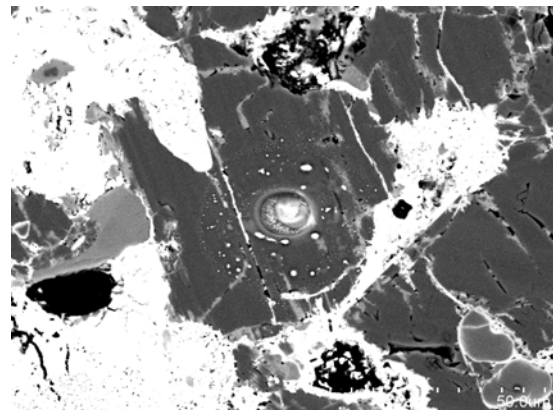

| Ch#                   | Analysis              |                       |   | Remarks |
|-----------------------|-----------------------|-----------------------|---|---------|
| <b>24</b>             | N24: 549.OI           |                       |   |         |
| $\delta^{17}\text{O}$ | $\delta^{18}\text{O}$ | $\Delta^{17}\text{O}$ | ‰ |         |
| -9.94                 | -6.68                 | -6.46                 |   |         |

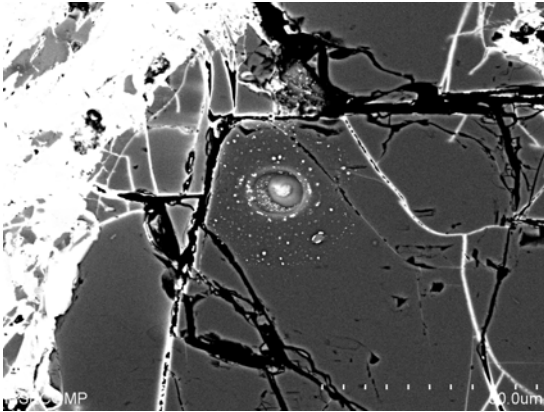

| Ch#                   | Analysis              |                       |   | Remarks |
|-----------------------|-----------------------|-----------------------|---|---------|
| <b>24</b>             | N24: 550.OI           |                       |   |         |
| $\delta^{17}\text{O}$ | $\delta^{18}\text{O}$ | $\Delta^{17}\text{O}$ | ‰ |         |
| -9.98                 | -6.71                 | -6.49                 |   |         |

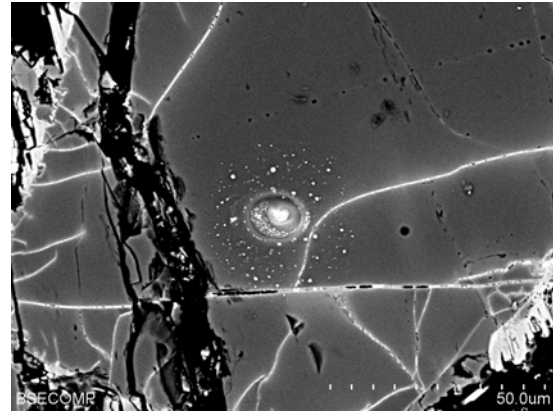

| Ch#                   | Analysis              |                       |   | Remarks |
|-----------------------|-----------------------|-----------------------|---|---------|
| <b>24</b>             | N24: 551.OI           |                       |   |         |
| $\delta^{17}\text{O}$ | $\delta^{18}\text{O}$ | $\Delta^{17}\text{O}$ | ‰ |         |
| -9.99                 | -6.52                 | -6.60                 |   |         |

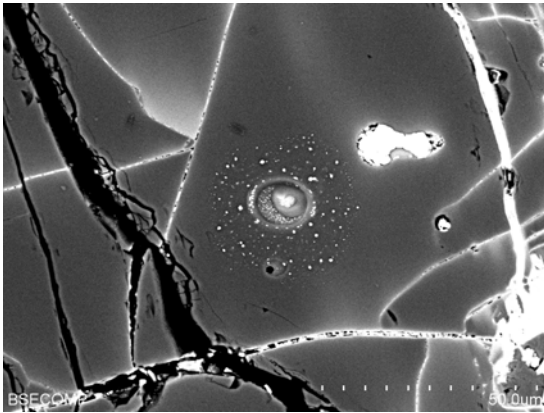

| Ch#                   | Analysis              |                       |   | Remarks |
|-----------------------|-----------------------|-----------------------|---|---------|
| <b>24</b>             | N24: 552.Lpx          |                       |   |         |
| $\delta^{17}\text{O}$ | $\delta^{18}\text{O}$ | $\Delta^{17}\text{O}$ | ‰ |         |
| -10.03                | -6.77                 | -6.51                 |   |         |

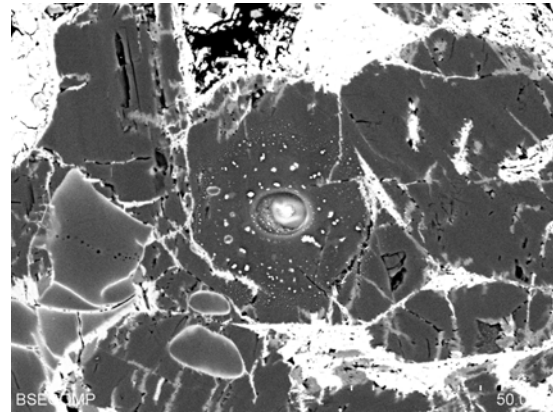

| Ch#                   | Analysis              |                       |   | Remarks |
|-----------------------|-----------------------|-----------------------|---|---------|
| <b>24</b>             | N24: 553.Lpx          |                       |   |         |
| $\delta^{17}\text{O}$ | $\delta^{18}\text{O}$ | $\Delta^{17}\text{O}$ | ‰ |         |
| -10.04                | -6.87                 | -6.46                 |   |         |

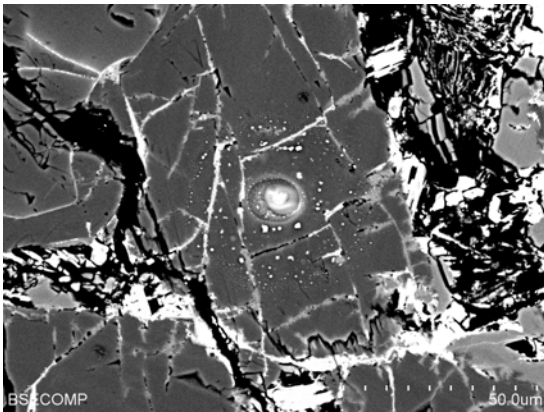

| Ch#                   | Analysis              |                       |   | Remarks |
|-----------------------|-----------------------|-----------------------|---|---------|
| <b>25</b>             | N25: 554.Lpx          |                       |   | C       |
| $\delta^{17}\text{O}$ | $\delta^{18}\text{O}$ | $\Delta^{17}\text{O}$ | ‰ |         |
| -8.94                 | -5.46                 | -6.10                 |   |         |

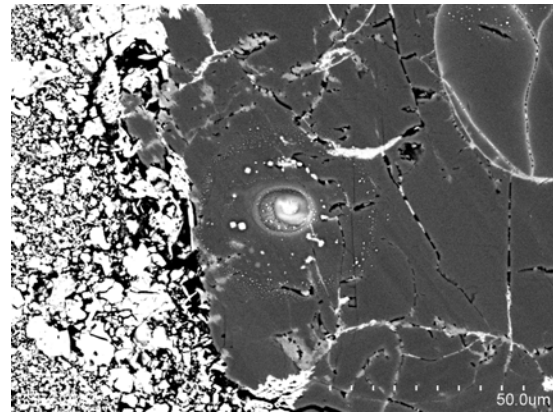

| Ch#                   | Analysis              |                       |   | Remarks |
|-----------------------|-----------------------|-----------------------|---|---------|
| <b>25</b>             | N25: 555.Lpx          |                       |   |         |
| $\delta^{17}\text{O}$ | $\delta^{18}\text{O}$ | $\Delta^{17}\text{O}$ | ‰ |         |
| -8.78                 | -5.75                 | -5.79                 |   |         |

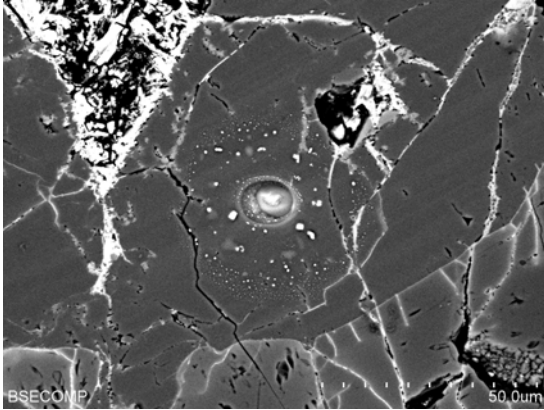

| Ch#                   | Analysis              |                       |   | Remarks |
|-----------------------|-----------------------|-----------------------|---|---------|
| <b>25</b>             | N25: 556.OI           |                       |   |         |
| $\delta^{17}\text{O}$ | $\delta^{18}\text{O}$ | $\Delta^{17}\text{O}$ | ‰ |         |
| -8.77                 | -5.35                 | -5.99                 |   |         |

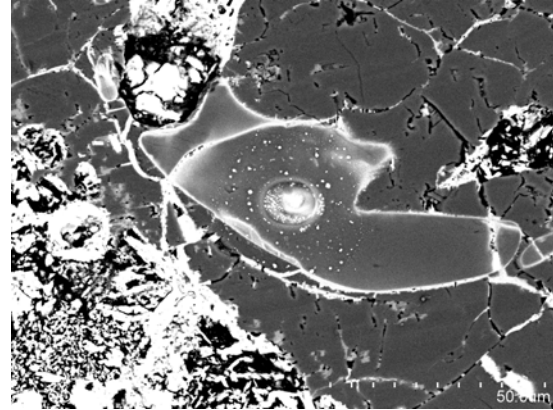

| Ch#                   | Analysis              |                       |   | Remarks |
|-----------------------|-----------------------|-----------------------|---|---------|
| <b>25</b>             | N25: 557.Lpx          |                       |   | C       |
| $\delta^{17}\text{O}$ | $\delta^{18}\text{O}$ | $\Delta^{17}\text{O}$ | ‰ |         |
| -9.04                 | -5.74                 | -6.06                 |   |         |

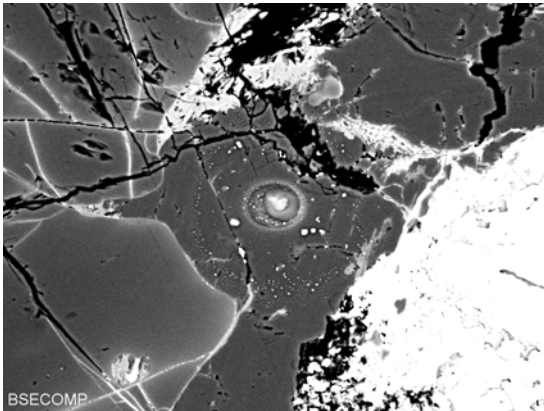

| Ch#                   | Analysis              |                       |   | Remarks |
|-----------------------|-----------------------|-----------------------|---|---------|
| <b>25</b>             | N25: 558.Lpx          |                       |   |         |
| $\delta^{17}\text{O}$ | $\delta^{18}\text{O}$ | $\Delta^{17}\text{O}$ | ‰ |         |
| -9.10                 | -5.52                 | -6.22                 |   |         |

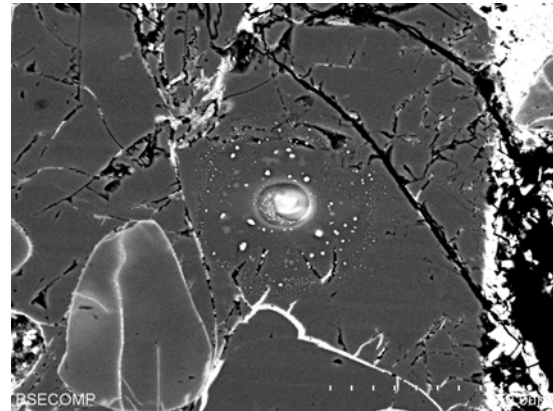

| Ch#                   | Analysis              |                       |   | Remarks |
|-----------------------|-----------------------|-----------------------|---|---------|
| <b>25</b>             | N25: 559.OI           |                       |   |         |
| $\delta^{17}\text{O}$ | $\delta^{18}\text{O}$ | $\Delta^{17}\text{O}$ | ‰ |         |
| -9.05                 | -5.45                 | -6.21                 |   |         |

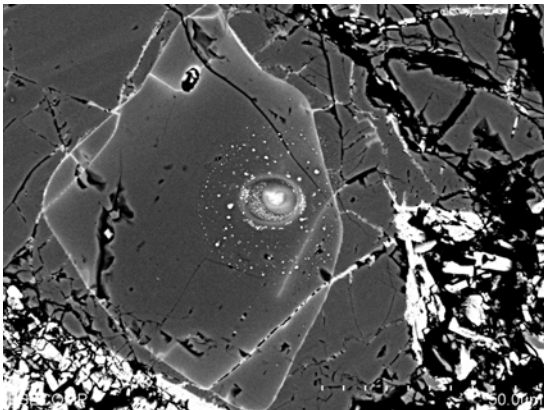

| Ch#                   | Analysis              |                       |   | Remarks |
|-----------------------|-----------------------|-----------------------|---|---------|
| <b>25</b>             | N25: 560.OI           |                       |   |         |
| $\delta^{17}\text{O}$ | $\delta^{18}\text{O}$ | $\Delta^{17}\text{O}$ | ‰ |         |
| -9.25                 | -5.61                 | -6.33                 |   |         |

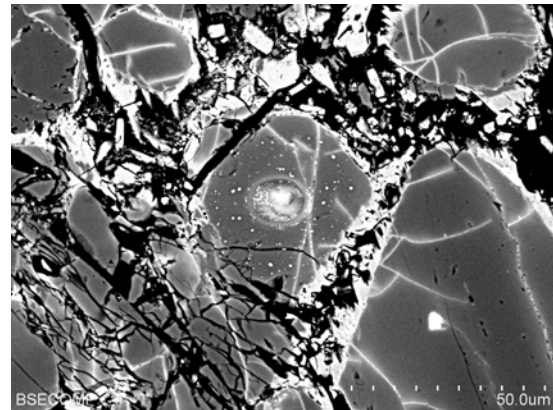

| Ch#                   | Analysis              |                       |   | Remarks |
|-----------------------|-----------------------|-----------------------|---|---------|
| <b>25</b>             | N25: 561.OI           |                       |   | C       |
| $\delta^{17}\text{O}$ | $\delta^{18}\text{O}$ | $\Delta^{17}\text{O}$ | ‰ |         |
| -9.12                 | -5.57                 | -6.22                 |   |         |

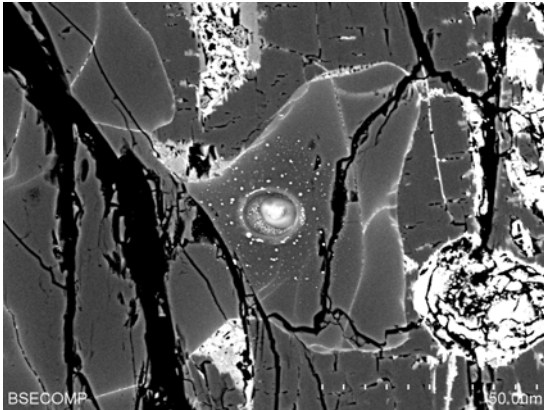

| Ch#                   | Analysis              |                       |   | Remarks |
|-----------------------|-----------------------|-----------------------|---|---------|
| <b>25</b>             | N25: 562.Lpx          |                       |   |         |
| $\delta^{17}\text{O}$ | $\delta^{18}\text{O}$ | $\Delta^{17}\text{O}$ | ‰ |         |
| -8.93                 | -5.67                 | -5.98                 |   |         |

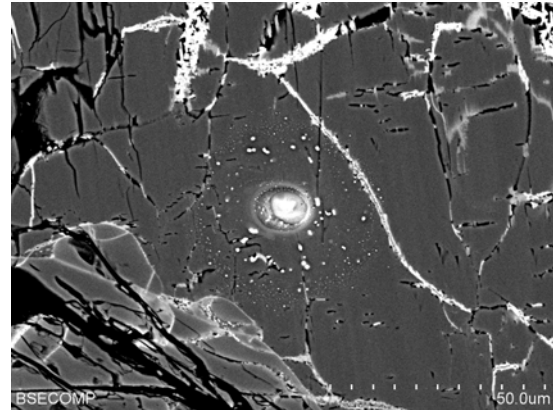

| Ch#                   | Analysis              |                       |   | Remarks |
|-----------------------|-----------------------|-----------------------|---|---------|
| <b>26</b>             | N26: 622.Lpx          |                       |   |         |
| $\delta^{17}\text{O}$ | $\delta^{18}\text{O}$ | $\Delta^{17}\text{O}$ | ‰ |         |
| -9.17                 | -5.70                 | -6.20                 |   |         |

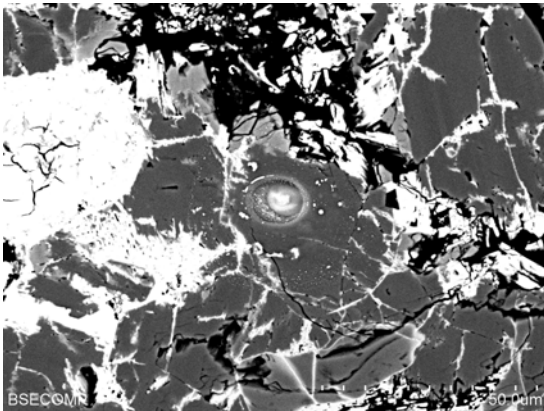

| Ch#                   | Analysis              |                       |   | Remarks |
|-----------------------|-----------------------|-----------------------|---|---------|
| <b>26</b>             | N26: 623.Lpx          |                       |   | C       |
| $\delta^{17}\text{O}$ | $\delta^{18}\text{O}$ | $\Delta^{17}\text{O}$ | ‰ |         |
| -8.58                 | -5.44                 | -5.75                 |   |         |

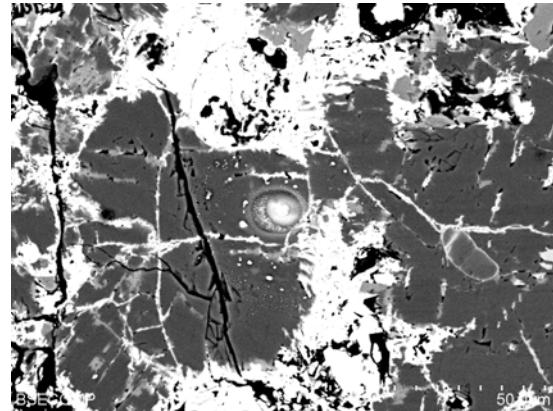

| Ch#                   | Analysis              |                       |   | Remarks |
|-----------------------|-----------------------|-----------------------|---|---------|
| <b>26</b>             | N26: 624.Lpx          |                       |   |         |
| $\delta^{17}\text{O}$ | $\delta^{18}\text{O}$ | $\Delta^{17}\text{O}$ | ‰ |         |
| -8.81                 | -5.77                 | -5.81                 |   |         |

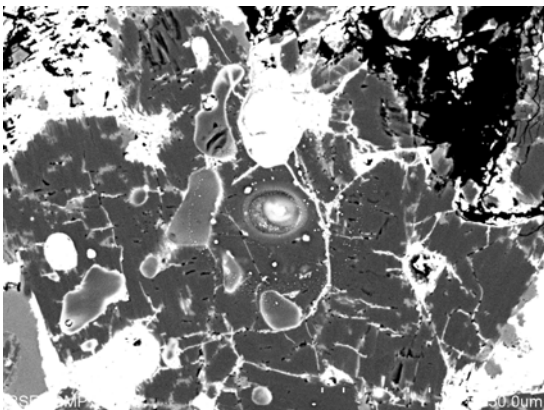

| Ch#                   | Analysis              |                       |   | Remarks |
|-----------------------|-----------------------|-----------------------|---|---------|
| <b>26</b>             | N26: 625.OI           |                       |   |         |
| $\delta^{17}\text{O}$ | $\delta^{18}\text{O}$ | $\Delta^{17}\text{O}$ | ‰ |         |
| -8.69                 | -5.92                 | -5.61                 |   |         |

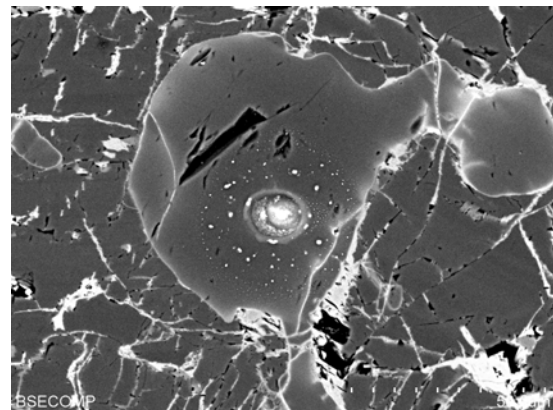

| Ch#                   | Analysis              |                       |   | Remarks |
|-----------------------|-----------------------|-----------------------|---|---------|
| <b>26</b>             | N26: 626.Lpx          |                       |   |         |
| $\delta^{17}\text{O}$ | $\delta^{18}\text{O}$ | $\Delta^{17}\text{O}$ | ‰ |         |
| -8.79                 | -5.69                 | -5.83                 |   |         |

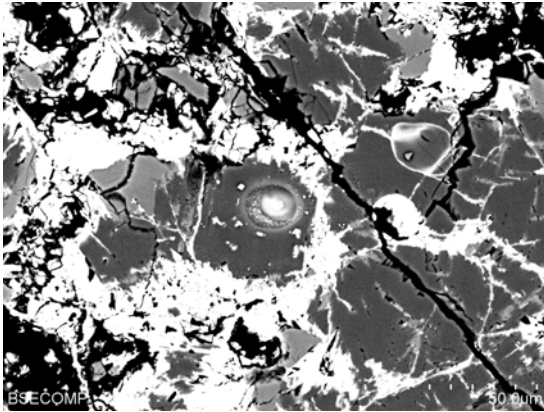

| Ch#                   | Analysis              |                       |   | Remarks |
|-----------------------|-----------------------|-----------------------|---|---------|
| <b>26</b>             | N26: 627.OI           |                       |   | C       |
| $\delta^{17}\text{O}$ | $\delta^{18}\text{O}$ | $\Delta^{17}\text{O}$ | ‰ |         |
| -8.89                 | -6.19                 | -5.67                 |   |         |

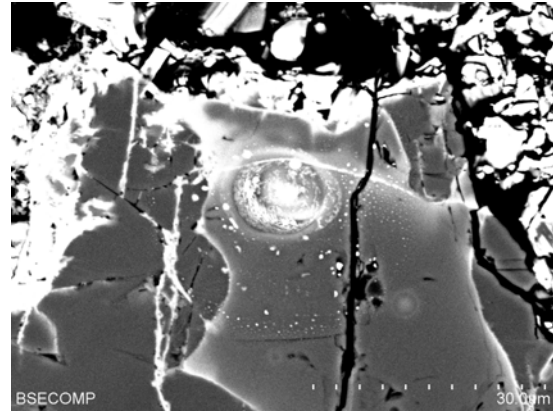

| Ch#                   | Analysis              |                       |   | Remarks |
|-----------------------|-----------------------|-----------------------|---|---------|
| <b>26</b>             | N26: 628.Lpx          |                       |   |         |
| $\delta^{17}\text{O}$ | $\delta^{18}\text{O}$ | $\Delta^{17}\text{O}$ | ‰ |         |
| -8.67                 | -6.17                 | -5.46                 |   |         |

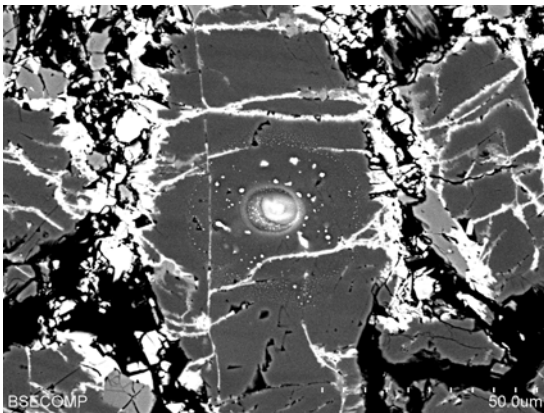

| Ch#                   | Analysis              |                       |   | Remarks |
|-----------------------|-----------------------|-----------------------|---|---------|
| <b>26</b>             | N26: 629.Lpx          |                       |   |         |
| $\delta^{17}\text{O}$ | $\delta^{18}\text{O}$ | $\Delta^{17}\text{O}$ | ‰ |         |
| -8.65                 | -5.64                 | -5.71                 |   |         |

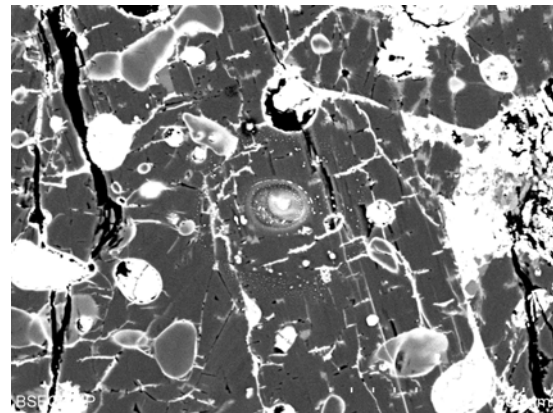

| Ch#                   | Analysis              |                       |   | Remarks |
|-----------------------|-----------------------|-----------------------|---|---------|
| <b>27</b>             | N27: 630.OI           |                       |   |         |
| $\delta^{17}\text{O}$ | $\delta^{18}\text{O}$ | $\Delta^{17}\text{O}$ | ‰ |         |
| -10.64                | -7.56                 | -6.71                 |   |         |

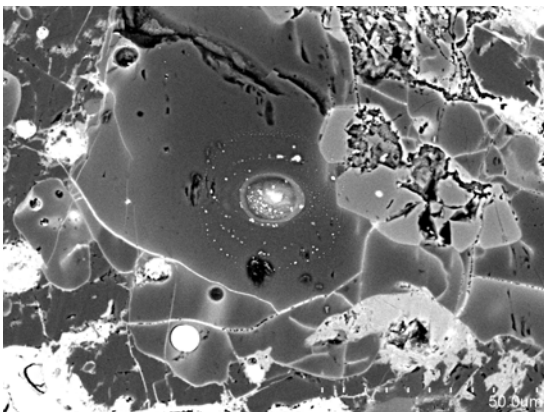

| Ch#                   | Analysis              |                       |   | Remarks |
|-----------------------|-----------------------|-----------------------|---|---------|
| <b>27</b>             | N27: 631.OI           |                       |   | C       |
| $\delta^{17}\text{O}$ | $\delta^{18}\text{O}$ | $\Delta^{17}\text{O}$ | ‰ |         |
| -10.71                | -7.65                 | -6.74                 |   |         |

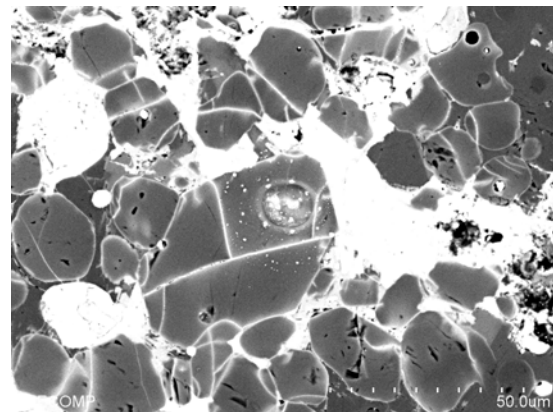

| Ch#                   | Analysis              |                       |   | Remarks |
|-----------------------|-----------------------|-----------------------|---|---------|
| <b>27</b>             | N27: 632.Lpx          |                       |   |         |
| $\delta^{17}\text{O}$ | $\delta^{18}\text{O}$ | $\Delta^{17}\text{O}$ | ‰ |         |
| -10.17                | -7.34                 | -6.35                 |   |         |

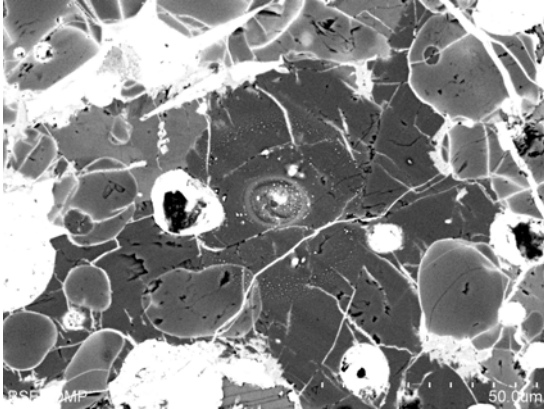

| Ch#                   | Analysis              |                       |   | Remarks |
|-----------------------|-----------------------|-----------------------|---|---------|
| <b>27</b>             | N27: 633.Lpx          |                       |   | P       |
| $\delta^{17}\text{O}$ | $\delta^{18}\text{O}$ | $\Delta^{17}\text{O}$ | ‰ |         |
| -10.58                | -7.30                 | -6.79                 |   |         |

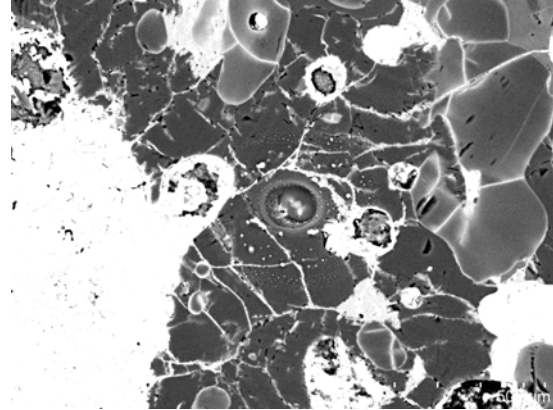

| Ch#                   | Analysis              |                       |   | Remarks |
|-----------------------|-----------------------|-----------------------|---|---------|
| <b>27</b>             | N27: 634.Lpx          |                       |   |         |
| $\delta^{17}\text{O}$ | $\delta^{18}\text{O}$ | $\Delta^{17}\text{O}$ | ‰ |         |
| -10.56                | -7.39                 | -6.72                 |   |         |

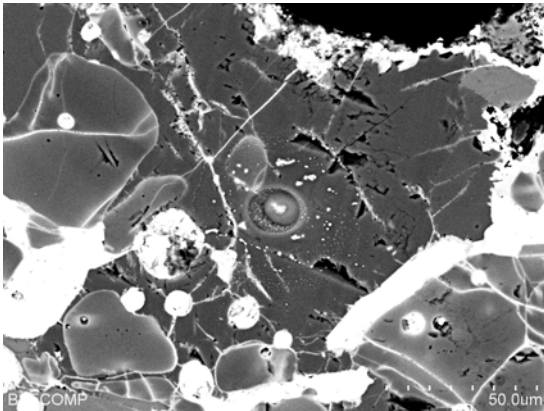

| Ch#                   | Analysis              |                       |   | Remarks |
|-----------------------|-----------------------|-----------------------|---|---------|
| <b>27</b>             | N27: 635.OI (Relict)  |                       |   |         |
| $\delta^{17}\text{O}$ | $\delta^{18}\text{O}$ | $\Delta^{17}\text{O}$ | ‰ |         |
| -15.79                | -13.34                | -8.85                 |   |         |

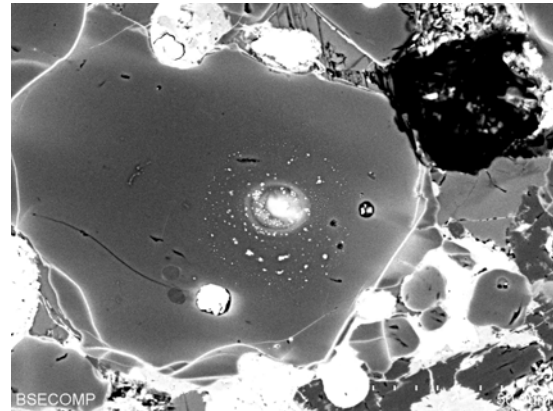

| Ch#                   | Analysis              |                       |   | Remarks |
|-----------------------|-----------------------|-----------------------|---|---------|
| <b>27</b>             | N27: 636.OI (Relict)  |                       |   |         |
| $\delta^{17}\text{O}$ | $\delta^{18}\text{O}$ | $\Delta^{17}\text{O}$ | ‰ |         |
| -13.84                | -11.32                | -7.96                 |   |         |

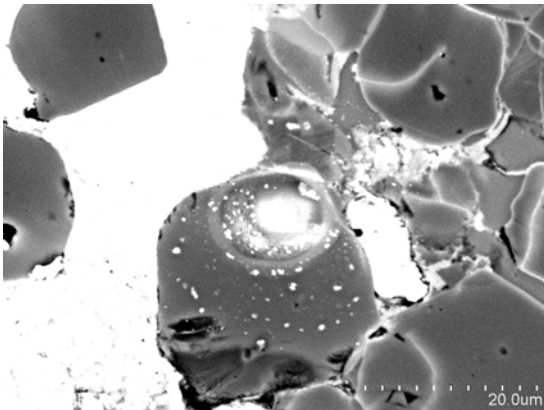

| Ch#                   | Analysis                |                       |   | Remarks |
|-----------------------|-------------------------|-----------------------|---|---------|
| <b>27</b>             | N27: 637.IntPx (Excl. C |                       |   |         |
| $\delta^{17}\text{O}$ | $\delta^{18}\text{O}$   | $\Delta^{17}\text{O}$ | ‰ |         |
| -9.74                 | -6.52                   | -6.35                 |   |         |

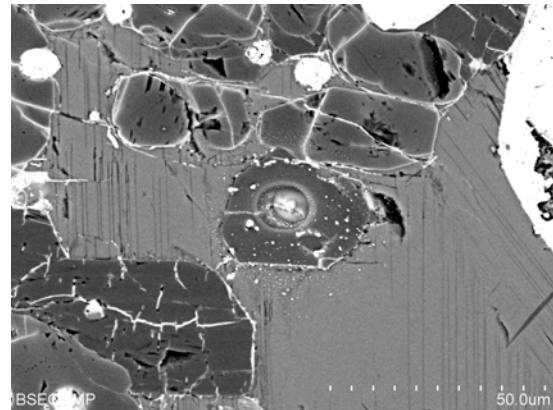



| Ch#                   | Analysis              |                       |   | Remarks |
|-----------------------|-----------------------|-----------------------|---|---------|
| <b>28</b>             | N28: 448.OI           |                       |   |         |
| $\delta^{17}\text{O}$ | $\delta^{18}\text{O}$ | $\Delta^{17}\text{O}$ | ‰ |         |
| -9.46                 | -6.59                 | -6.03                 |   |         |

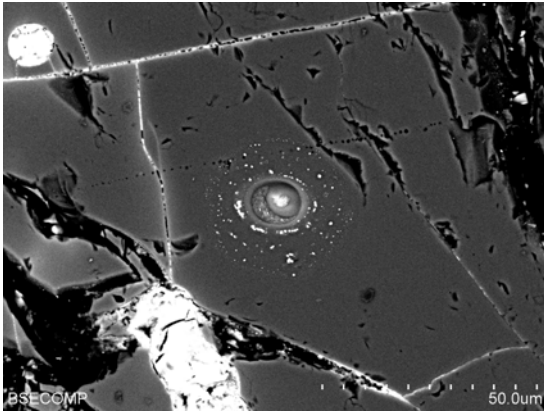

| Ch#                   | Analysis              |                       |   | Remarks |
|-----------------------|-----------------------|-----------------------|---|---------|
| <b>28</b>             | N28: 450.OI           |                       |   |         |
| $\delta^{17}\text{O}$ | $\delta^{18}\text{O}$ | $\Delta^{17}\text{O}$ | ‰ |         |
| -9.38                 | -6.39                 | -6.05                 |   |         |

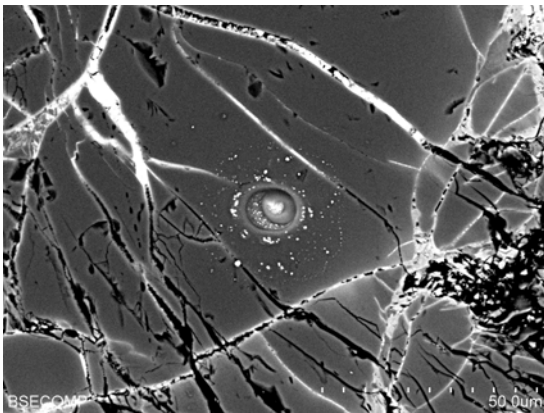

| Ch#                   | Analysis              |                       |   | Remarks |
|-----------------------|-----------------------|-----------------------|---|---------|
| <b>28</b>             | N28: 452.OI           |                       |   |         |
| $\delta^{17}\text{O}$ | $\delta^{18}\text{O}$ | $\Delta^{17}\text{O}$ | ‰ |         |
| -9.65                 | -6.45                 | -6.30                 |   |         |

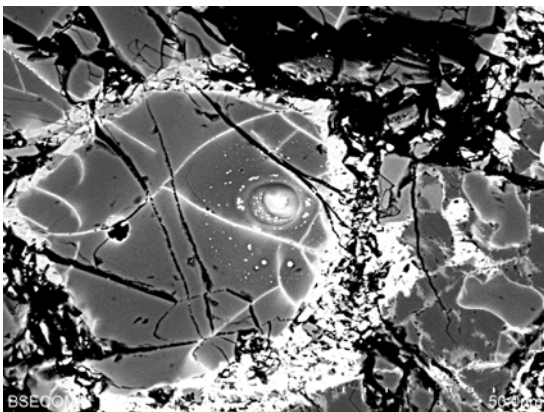

| Ch#                   | Analysis              |                       |   | Remarks |
|-----------------------|-----------------------|-----------------------|---|---------|
| <b>28</b>             | N28: 449.OI           |                       |   |         |
| $\delta^{17}\text{O}$ | $\delta^{18}\text{O}$ | $\Delta^{17}\text{O}$ | ‰ |         |
| -9.35                 | -6.28                 | -6.09                 |   |         |

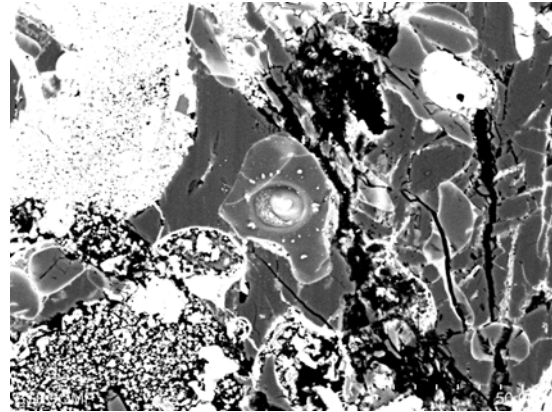

| Ch#                   | Analysis              |                       |   | Remarks |
|-----------------------|-----------------------|-----------------------|---|---------|
| <b>28</b>             | N28: 451.Lpx          |                       |   |         |
| $\delta^{17}\text{O}$ | $\delta^{18}\text{O}$ | $\Delta^{17}\text{O}$ | ‰ |         |
| -9.35                 | -6.25                 | -6.10                 |   |         |

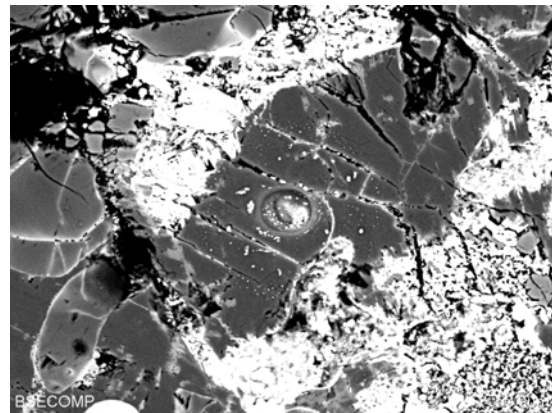

| Ch#                   | Analysis              |                       |   | Remarks |
|-----------------------|-----------------------|-----------------------|---|---------|
| <b>28</b>             | N28: 453.OI           |                       |   |         |
| $\delta^{17}\text{O}$ | $\delta^{18}\text{O}$ | $\Delta^{17}\text{O}$ | ‰ |         |
| -9.50                 | -6.51                 | -6.11                 |   |         |

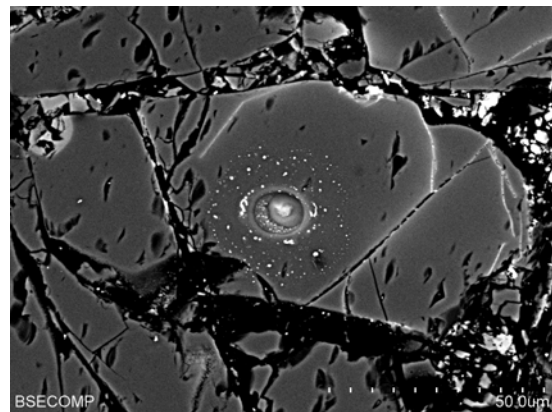

| Ch#                   | Analysis              |                       |   | Remarks |
|-----------------------|-----------------------|-----------------------|---|---------|
| <b>29</b>             | N29: 642.OI           |                       |   |         |
| $\delta^{17}\text{O}$ | $\delta^{18}\text{O}$ | $\Delta^{17}\text{O}$ | ‰ |         |
| -7.06                 | -4.43                 | -4.75                 |   |         |

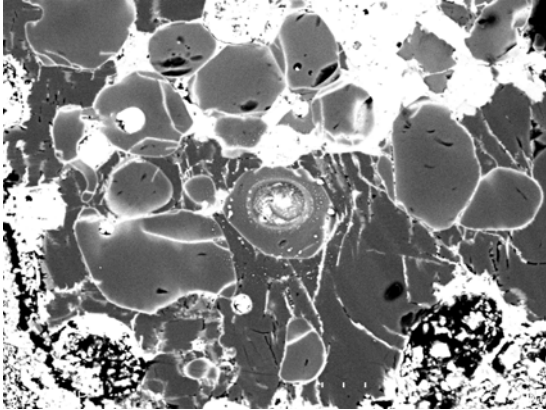

| Ch#                   | Analysis              |                       |   | Remarks |
|-----------------------|-----------------------|-----------------------|---|---------|
| <b>29</b>             | N29: 643.OI (Excl.)   |                       |   | CC, TP  |
| $\delta^{17}\text{O}$ | $\delta^{18}\text{O}$ | $\Delta^{17}\text{O}$ | ‰ |         |
| -8.08                 | -4.92                 | -5.53                 |   |         |

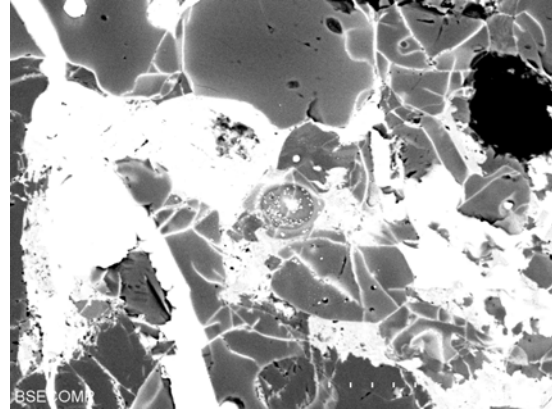

| Ch#                   | Analysis              |                       |   | Remarks |
|-----------------------|-----------------------|-----------------------|---|---------|
| <b>29</b>             | N29: 644.OI           |                       |   |         |
| $\delta^{17}\text{O}$ | $\delta^{18}\text{O}$ | $\Delta^{17}\text{O}$ | ‰ |         |
| -7.27                 | -4.35                 | -5.01                 |   |         |

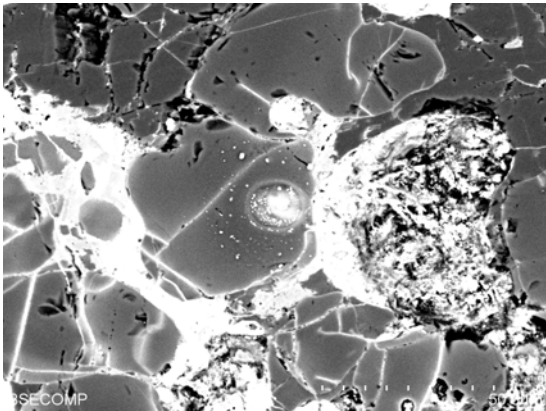

| Ch#                   | Analysis              |                       |   | Remarks |
|-----------------------|-----------------------|-----------------------|---|---------|
| <b>29</b>             | N29: 645.Lpx          |                       |   | C       |
| $\delta^{17}\text{O}$ | $\delta^{18}\text{O}$ | $\Delta^{17}\text{O}$ | ‰ |         |
| -7.81                 | -4.63                 | -5.41                 |   |         |

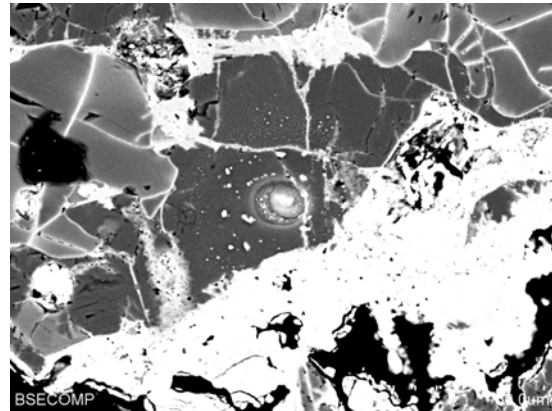

| Ch#                   | Analysis              |                       |   | Remarks |
|-----------------------|-----------------------|-----------------------|---|---------|
| <b>29</b>             | N29: 646.Lpx          |                       |   |         |
| $\delta^{17}\text{O}$ | $\delta^{18}\text{O}$ | $\Delta^{17}\text{O}$ | ‰ |         |
| -7.55                 | -4.47                 | -5.22                 |   |         |

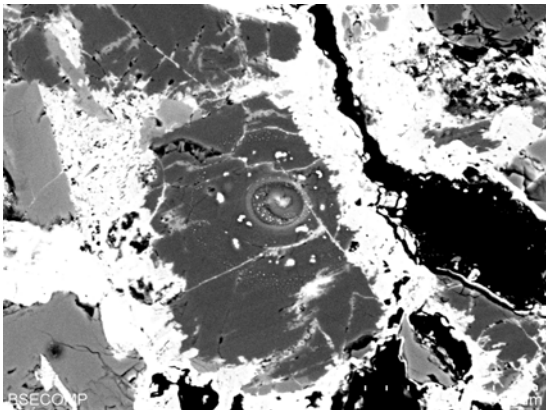

| Ch#                   | Analysis              |                       |   | Remarks |
|-----------------------|-----------------------|-----------------------|---|---------|
| <b>29</b>             | N29: 647.OI           |                       |   |         |
| $\delta^{17}\text{O}$ | $\delta^{18}\text{O}$ | $\Delta^{17}\text{O}$ | ‰ |         |
| -7.49                 | -4.08                 | -5.36                 |   |         |

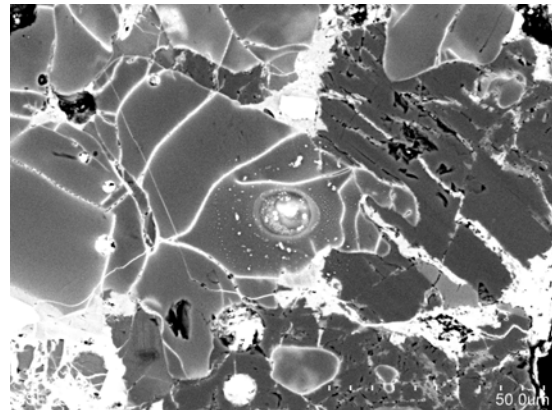

| Ch#                   | Analysis              |                       |   | Remarks |
|-----------------------|-----------------------|-----------------------|---|---------|
| <b>29</b>             | N29: 648.OI           |                       |   |         |
| $\delta^{17}\text{O}$ | $\delta^{18}\text{O}$ | $\Delta^{17}\text{O}$ | ‰ |         |
| -6.97                 | -3.76                 | -5.01                 |   |         |

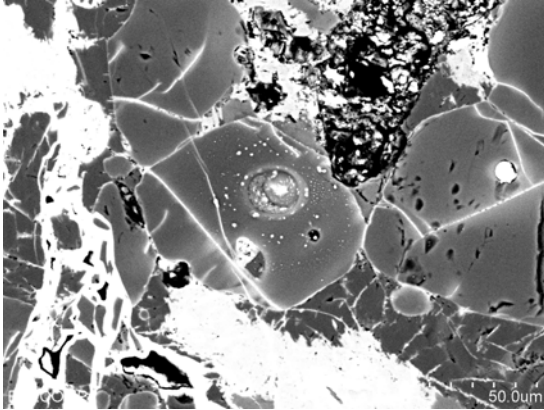

| Ch#                   | Analysis              |                       |   | Remarks |
|-----------------------|-----------------------|-----------------------|---|---------|
| <b>29</b>             | N29: 649.Lpx          |                       |   |         |
| $\delta^{17}\text{O}$ | $\delta^{18}\text{O}$ | $\Delta^{17}\text{O}$ | ‰ |         |
| -7.65                 | -4.92                 | -5.09                 |   |         |

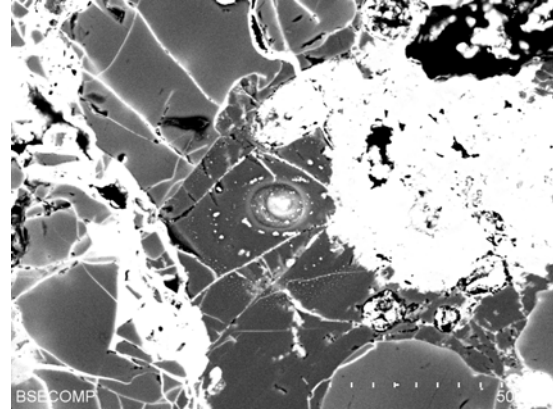

| Ch#                   | Analysis              |                       |   | Remarks |
|-----------------------|-----------------------|-----------------------|---|---------|
| <b>30</b>             | N30: 650.OI           |                       |   |         |
| $\delta^{17}\text{O}$ | $\delta^{18}\text{O}$ | $\Delta^{17}\text{O}$ | ‰ |         |
| -5.90                 | -2.50                 | -4.60                 |   |         |

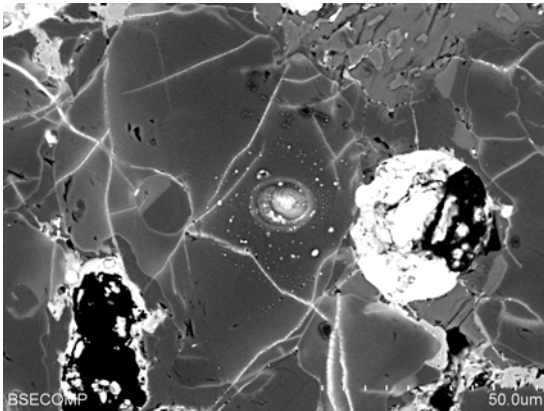

| Ch#                   | Analysis              |                       |   | Remarks |
|-----------------------|-----------------------|-----------------------|---|---------|
| <b>30</b>             | N30: 651.IntPx        |                       |   |         |
| $\delta^{17}\text{O}$ | $\delta^{18}\text{O}$ | $\Delta^{17}\text{O}$ | ‰ |         |
| -5.87                 | -2.74                 | -4.44                 |   |         |

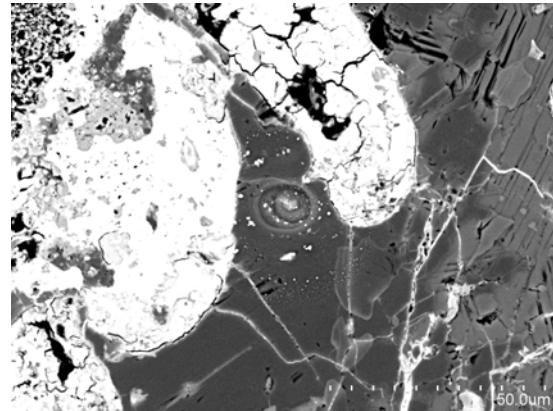

| Ch#                   | Analysis              |                       |   | Remarks |
|-----------------------|-----------------------|-----------------------|---|---------|
| <b>30</b>             | N30: 652.OI           |                       |   |         |
| $\delta^{17}\text{O}$ | $\delta^{18}\text{O}$ | $\Delta^{17}\text{O}$ | ‰ |         |
| -6.04                 | -2.69                 | -4.65                 |   |         |

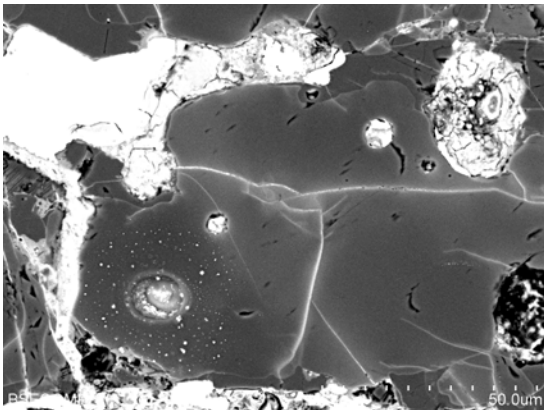

| Ch#                   | Analysis              |                       |   | Remarks |
|-----------------------|-----------------------|-----------------------|---|---------|
| <b>30</b>             | N30: 653.OI           |                       |   |         |
| $\delta^{17}\text{O}$ | $\delta^{18}\text{O}$ | $\Delta^{17}\text{O}$ | ‰ |         |
| -6.12                 | -2.52                 | -4.81                 |   |         |

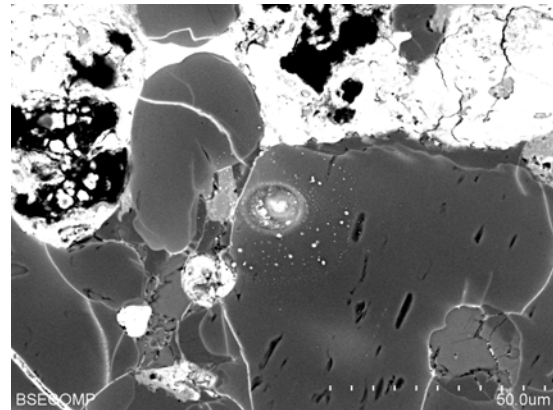

| Ch#                   | Analysis              |                       |   | Remarks |
|-----------------------|-----------------------|-----------------------|---|---------|
| <b>30</b>             | N30: 654.OI           |                       |   |         |
| $\delta^{17}\text{O}$ | $\delta^{18}\text{O}$ | $\Delta^{17}\text{O}$ | ‰ |         |
| -5.55                 | -2.31                 | -4.34                 |   |         |

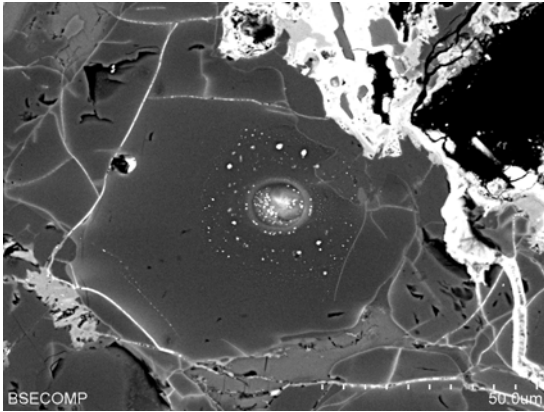

| Ch#                   | Analysis              |                       |   | Remarks |
|-----------------------|-----------------------|-----------------------|---|---------|
| <b>30</b>             | N30: 655.IntPx        |                       |   |         |
| $\delta^{17}\text{O}$ | $\delta^{18}\text{O}$ | $\Delta^{17}\text{O}$ | ‰ |         |
| -6.11                 | -2.86                 | -4.62                 |   |         |

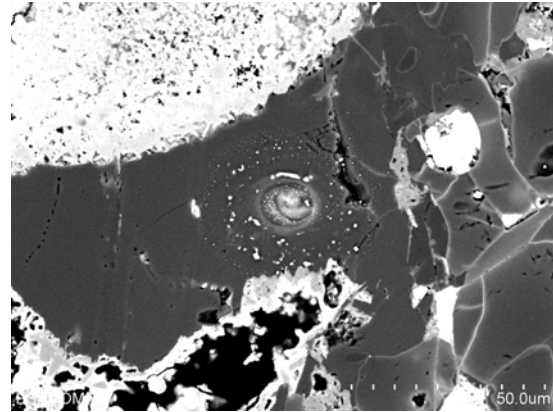

| Ch#                   | Analysis              |                       |   | Remarks |
|-----------------------|-----------------------|-----------------------|---|---------|
| <b>31</b>             | N31: 660.OI           |                       |   |         |
| $\delta^{17}\text{O}$ | $\delta^{18}\text{O}$ | $\Delta^{17}\text{O}$ | ‰ |         |
| -7.28                 | -4.08                 | -5.16                 |   |         |

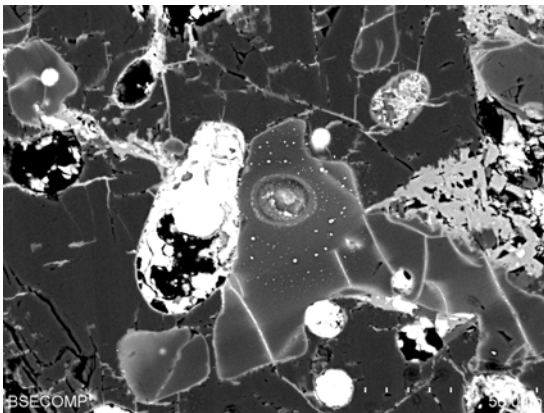

| Ch#                   | Analysis              |                       |   | Remarks |
|-----------------------|-----------------------|-----------------------|---|---------|
| <b>31</b>             | N31: 661.Lpx          |                       |   |         |
| $\delta^{17}\text{O}$ | $\delta^{18}\text{O}$ | $\Delta^{17}\text{O}$ | ‰ |         |
| -8.05                 | -5.07                 | -5.41                 |   |         |

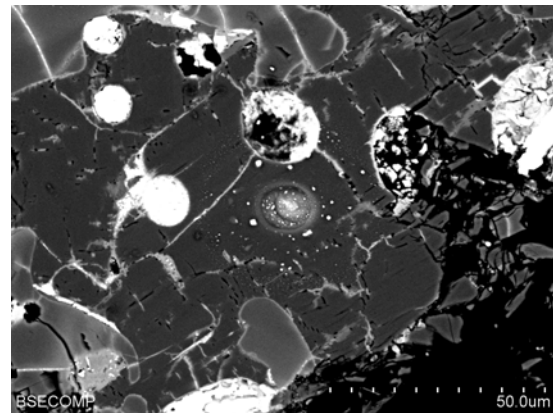

| Ch#                   | Analysis              |                       |   | Remarks |
|-----------------------|-----------------------|-----------------------|---|---------|
| <b>31</b>             | N31: 662.OI           |                       |   |         |
| $\delta^{17}\text{O}$ | $\delta^{18}\text{O}$ | $\Delta^{17}\text{O}$ | ‰ |         |
| -7.55                 | -4.00                 | -5.47                 |   |         |

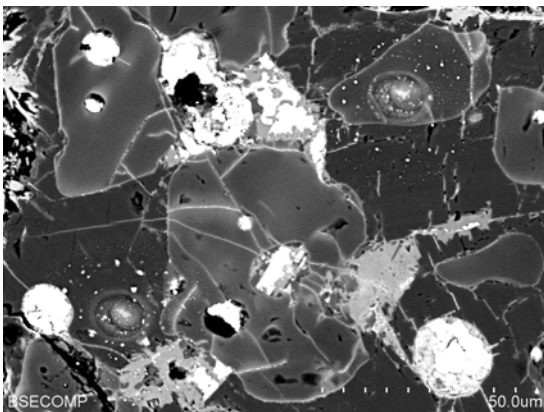

| Ch#                   | Analysis              |                       |   | Remarks |
|-----------------------|-----------------------|-----------------------|---|---------|
| <b>31</b>             | N31: 663.Lpx          |                       |   | C       |
| $\delta^{17}\text{O}$ | $\delta^{18}\text{O}$ | $\Delta^{17}\text{O}$ | ‰ |         |
| -7.99                 | -4.92                 | -5.43                 |   |         |

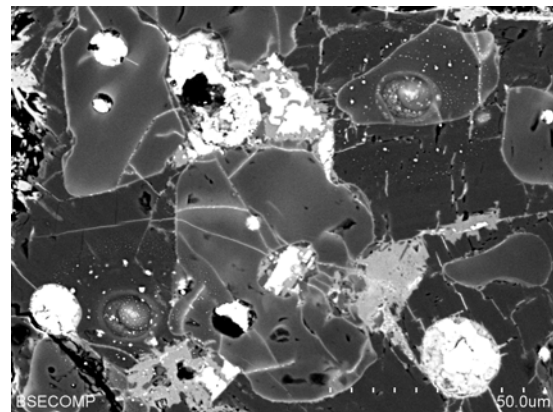

| Ch#                   | Analysis              |                       |   | Remarks |
|-----------------------|-----------------------|-----------------------|---|---------|
| <b>31</b>             | N31: 664.Lpx          |                       |   |         |
| $\delta^{17}\text{O}$ | $\delta^{18}\text{O}$ | $\Delta^{17}\text{O}$ | ‰ |         |
| -8.48                 | -5.30                 | -5.72                 |   |         |

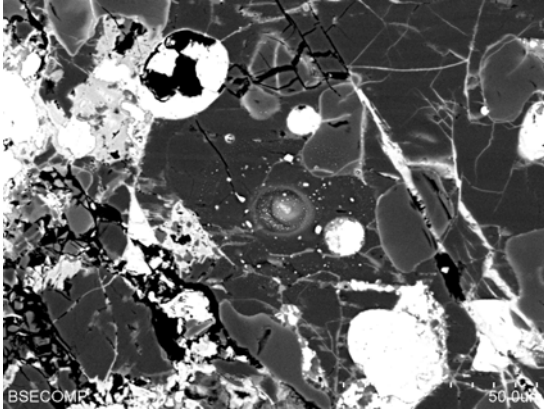

| Ch#                   | Analysis              |                       |   | Remarks |
|-----------------------|-----------------------|-----------------------|---|---------|
| <b>31</b>             | N31: 665.OI           |                       |   |         |
| $\delta^{17}\text{O}$ | $\delta^{18}\text{O}$ | $\Delta^{17}\text{O}$ | ‰ |         |
| -7.29                 | -4.17                 | -5.12                 |   |         |

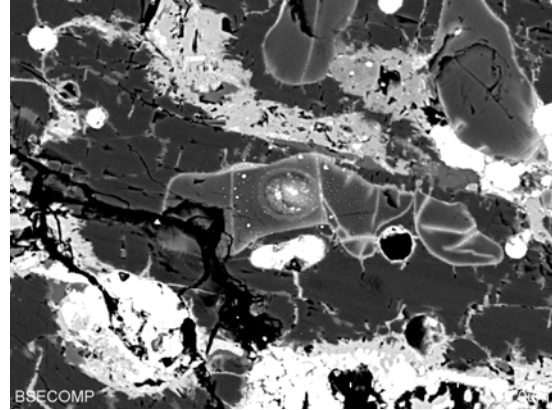

| Ch#                   | Analysis              |                       |   | Remarks |
|-----------------------|-----------------------|-----------------------|---|---------|
| <b>31</b>             | N31: 666.OI           |                       |   |         |
| $\delta^{17}\text{O}$ | $\delta^{18}\text{O}$ | $\Delta^{17}\text{O}$ | ‰ |         |
| -7.32                 | -4.25                 | -5.11                 |   |         |

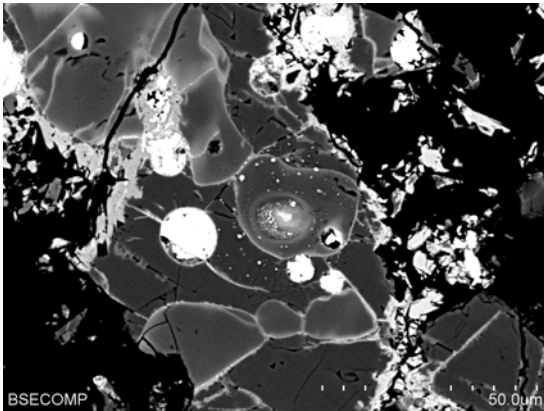

| Ch#                   | Analysis              |                       |   | Remarks |
|-----------------------|-----------------------|-----------------------|---|---------|
| <b>31</b>             | N31: 667.Lpx          |                       |   |         |
| $\delta^{17}\text{O}$ | $\delta^{18}\text{O}$ | $\Delta^{17}\text{O}$ | ‰ |         |
| -8.20                 | -5.36                 | -5.41                 |   |         |

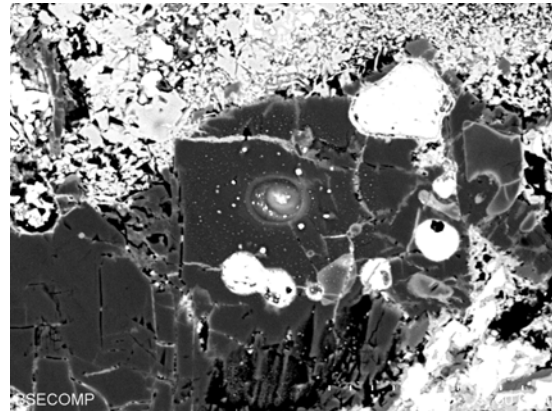

Supplement: NIHMS1567244-supplement-Sup6.pdf [file NIHMS1567244-supplement-Sup6.pdf]
