# Supplementary material
Source: PubMed Central journal article supplement (PMC7121232)

# **Data S7**

Documentation of SIMS  
pits (plagioclase)

| Analysis              | Ch#                   | Chondrite               |
|-----------------------|-----------------------|-------------------------|
| K1: 19.pl             | 1                     | Kaba 1052-1             |
| $\delta^{17}\text{O}$ | $\delta^{18}\text{O}$ | $\Delta^{17}\text{O}$ ‰ |
| 6.41                  | 14.69                 | -1.23                   |

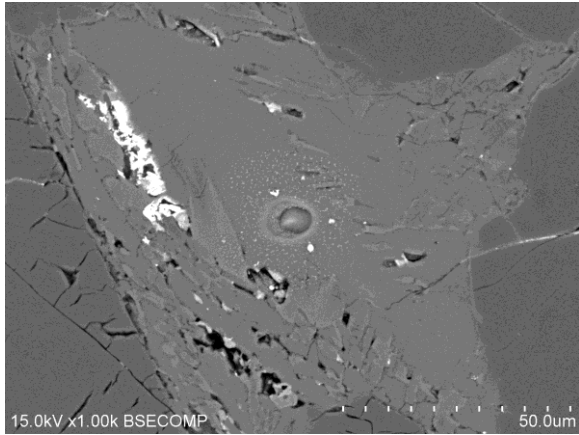

| Analysis              | Ch#                   | Chondrite               |
|-----------------------|-----------------------|-------------------------|
| K1: 20.pl (excl.)     | 1                     | Kaba 1052-1             |
| $\delta^{17}\text{O}$ | $\delta^{18}\text{O}$ | $\Delta^{17}\text{O}$ ‰ |
| 4.20                  | 10.42                 | -1.22                   |

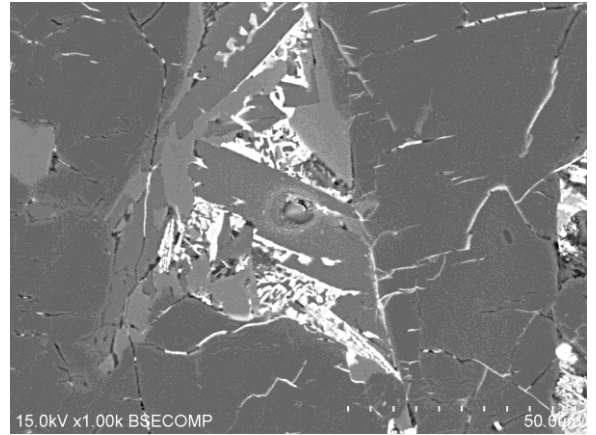

| Analysis              | Ch#                   | Chondrite               |
|-----------------------|-----------------------|-------------------------|
| K1: 21.pl (upper)     | 1                     | Kaba 1052-1             |
| $\delta^{17}\text{O}$ | $\delta^{18}\text{O}$ | $\Delta^{17}\text{O}$ ‰ |
| 1.77                  | 6.51                  | -1.62                   |

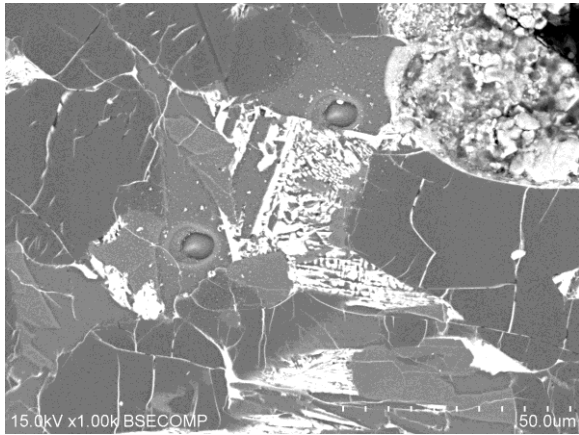

| Analysis              | Ch#                   | Chondrite               |
|-----------------------|-----------------------|-------------------------|
| K1: 22.pl (lower)     | 1                     | Kaba 1052-1             |
| $\delta^{17}\text{O}$ | $\delta^{18}\text{O}$ | $\Delta^{17}\text{O}$ ‰ |
| 5.25                  | 11.86                 | -0.92                   |

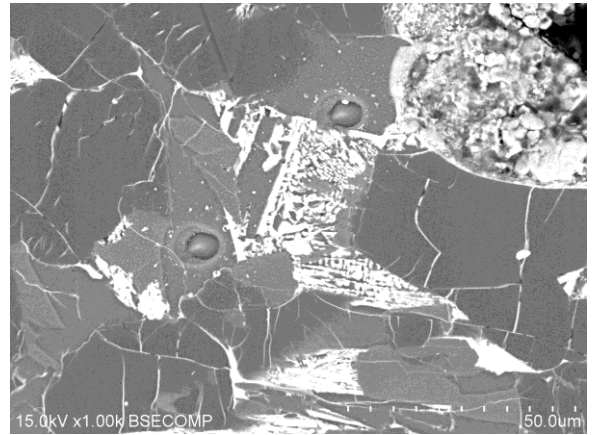

| Analysis              | Ch#                   | Chondrite               |
|-----------------------|-----------------------|-------------------------|
| K3: 23.pl             | 3                     | Kaba 1052-1             |
| $\delta^{17}\text{O}$ | $\delta^{18}\text{O}$ | $\Delta^{17}\text{O}$ ‰ |
| 6.35                  | 14.18                 | -1.02                   |

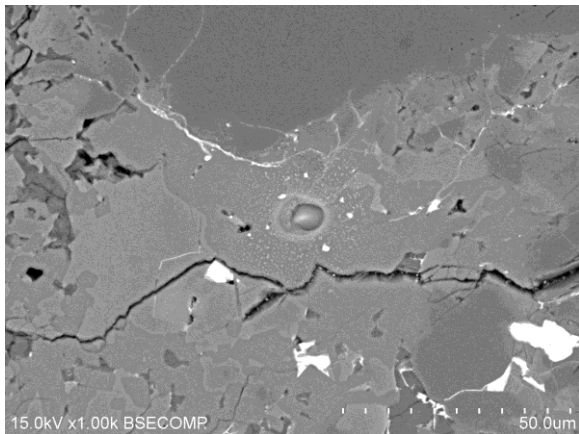

| Analysis              | Ch#                   | Chondrite               |
|-----------------------|-----------------------|-------------------------|
| K5: 24.pl             | 5                     | Kaba 1052-1             |
| $\delta^{17}\text{O}$ | $\delta^{18}\text{O}$ | $\Delta^{17}\text{O}$ ‰ |
| 6.71                  | 14.40                 | -0.78                   |

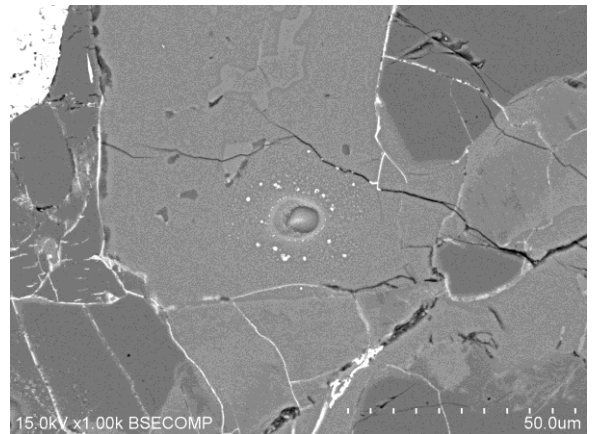

| Analysis              | Ch#                   | Chondrite               |
|-----------------------|-----------------------|-------------------------|
| K5: 25.pl             | 5                     | Kaba 1052-1             |
| $\delta^{17}\text{O}$ | $\delta^{18}\text{O}$ | $\Delta^{17}\text{O}$ ‰ |
| 6.84                  | 14.63                 | -0.76                   |

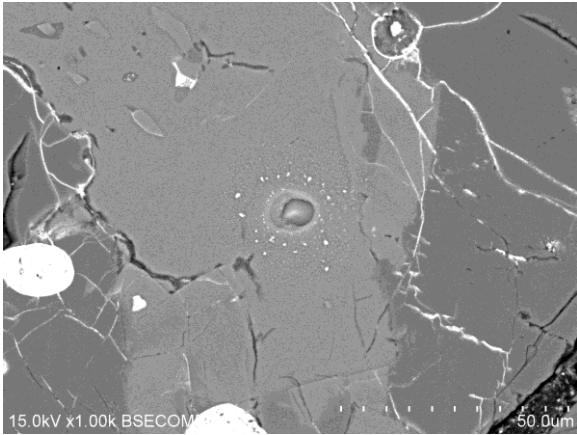

| Analysis              | Ch#                   | Chondrite               |
|-----------------------|-----------------------|-------------------------|
| K5: 26.pl             | 5                     | Kaba 1052-1             |
| $\delta^{17}\text{O}$ | $\delta^{18}\text{O}$ | $\Delta^{17}\text{O}$ ‰ |
| 6.64                  | 14.42                 | -0.85                   |

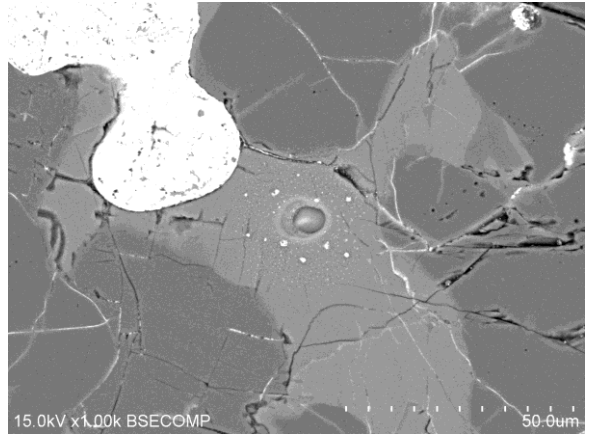

| Analysis              | Ch#                   | Chondrite               |
|-----------------------|-----------------------|-------------------------|
| K8+9: 28.pl           | K8+9                  | Kaba 1052-1             |
| $\delta^{17}\text{O}$ | $\delta^{18}\text{O}$ | $\Delta^{17}\text{O}$ ‰ |
| 6.77                  | 14.43                 | -0.73                   |

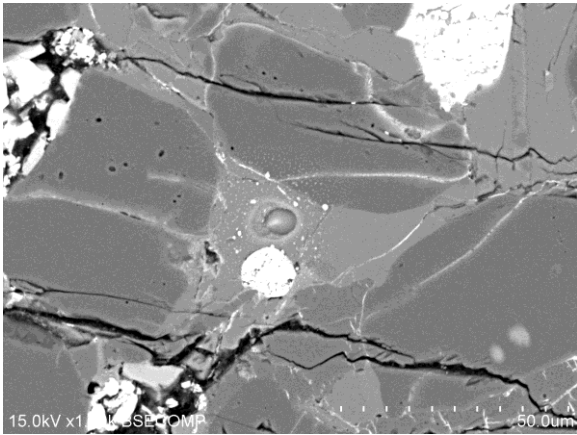

| Analysis (right pit)  | Ch#                   | Chondrite               |
|-----------------------|-----------------------|-------------------------|
| K8+9: 29.pl (excl.)   | K8+9                  | Kaba 1052-1             |
| $\delta^{17}\text{O}$ | $\delta^{18}\text{O}$ | $\Delta^{17}\text{O}$ ‰ |
| 7.18                  | 15.07                 | -0.66                   |

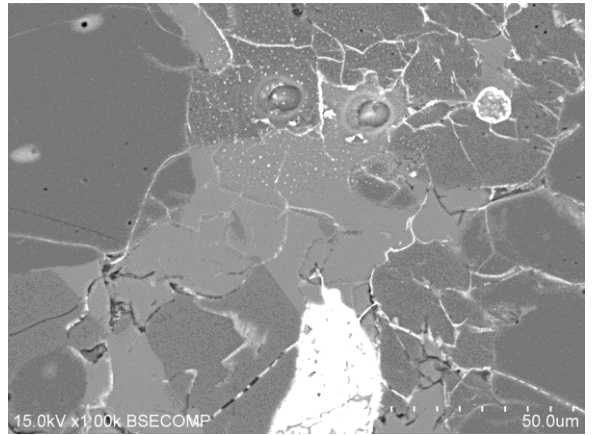

| Analysis              | Ch#                   | Chondrite               |
|-----------------------|-----------------------|-------------------------|
| K8+9: 30.pl           | K8+9                  | Kaba 1052-1             |
| $\delta^{17}\text{O}$ | $\delta^{18}\text{O}$ | $\Delta^{17}\text{O}$ ‰ |
| 6.13                  | 13.70                 | -0.99                   |

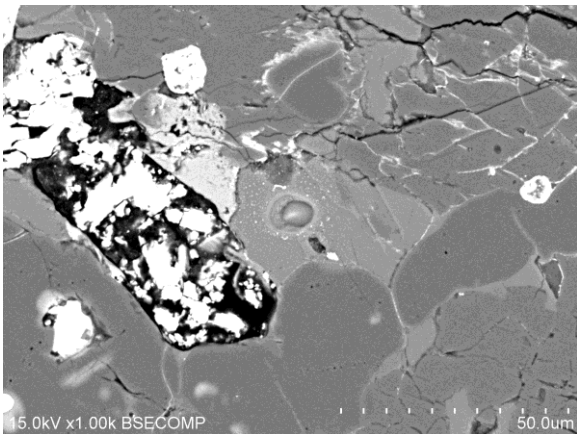

| Analysis              | Ch#                   | Chondrite               |
|-----------------------|-----------------------|-------------------------|
| K10: 31.pl            | 10                    | Kaba 1052-1             |
| $\delta^{17}\text{O}$ | $\delta^{18}\text{O}$ | $\Delta^{17}\text{O}$ ‰ |
| 5.84                  | 13.41                 | -1.14                   |

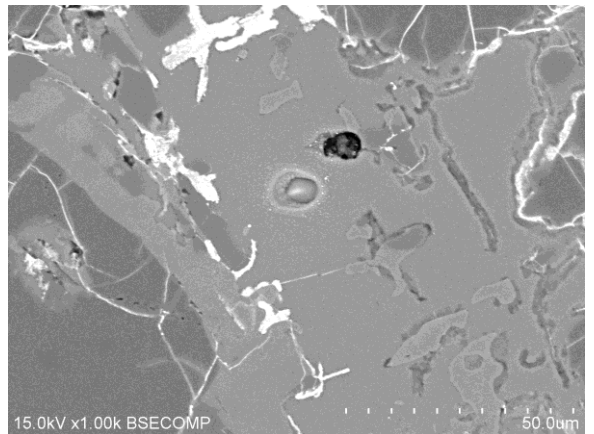

| Analysis              | Ch#                   | Chondrite               |
|-----------------------|-----------------------|-------------------------|
| K10: 32.pl            | 10                    | Kaba 1052-1             |
| $\delta^{17}\text{O}$ | $\delta^{18}\text{O}$ | $\Delta^{17}\text{O}$ ‰ |
| 5.40                  | 12.78                 | -1.24                   |

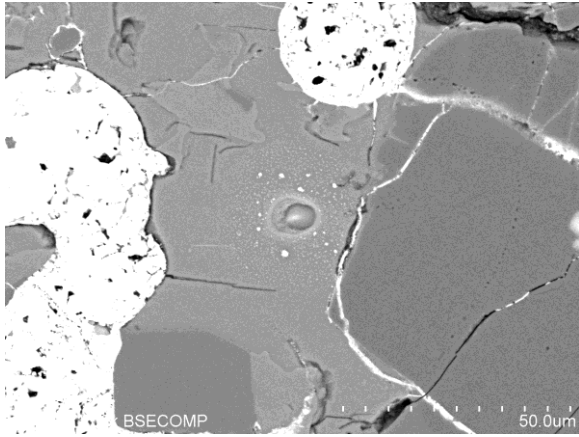

| Analysis              | Ch#                   | Chondrite               |
|-----------------------|-----------------------|-------------------------|
| K10: 33.pl            | 10                    | Kaba 1052-1             |
| $\delta^{17}\text{O}$ | $\delta^{18}\text{O}$ | $\Delta^{17}\text{O}$ ‰ |
| 6.87                  | 14.94                 | -0.90                   |

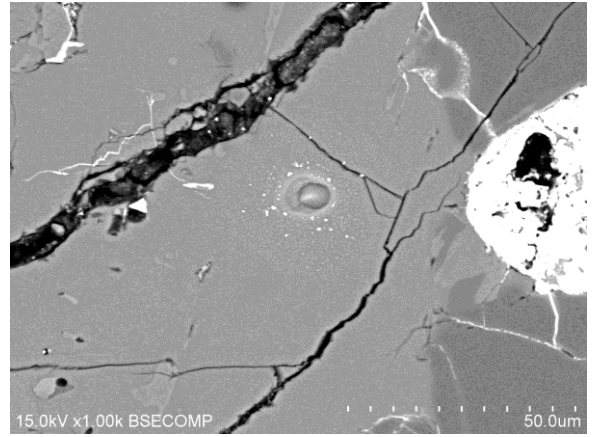

| Analysis              | Ch#                   | Chondrite               |
|-----------------------|-----------------------|-------------------------|
| K21: 34.pl            | 21                    | Kaba 1052-1             |
| $\delta^{17}\text{O}$ | $\delta^{18}\text{O}$ | $\Delta^{17}\text{O}$ ‰ |
| 7.25                  | 15.03                 | -0.56                   |

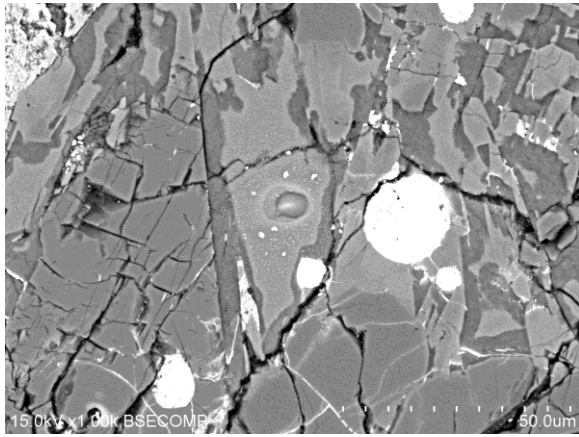

| Analysis              | Ch#                   | Chondrite               |
|-----------------------|-----------------------|-------------------------|
| K24: 35.pl            | 24                    | Kaba 1052-1             |
| $\delta^{17}\text{O}$ | $\delta^{18}\text{O}$ | $\Delta^{17}\text{O}$ ‰ |
| 6.97                  | 15.07                 | -0.86                   |

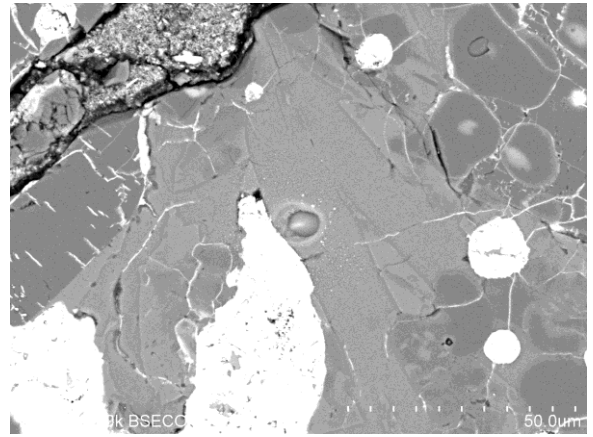

| Analysis              | Ch#                   | Chondrite               |
|-----------------------|-----------------------|-------------------------|
| K24: 36.pl            | 24                    | Kaba 1052-1             |
| $\delta^{17}\text{O}$ | $\delta^{18}\text{O}$ | $\Delta^{17}\text{O}$ ‰ |
| 5.21                  | 12.31                 | -1.20                   |

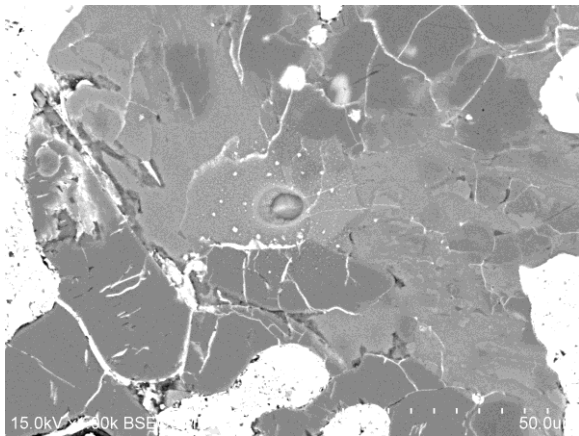

| Analysis              | Ch#                   | Chondrite               |
|-----------------------|-----------------------|-------------------------|
| N3: 41.pl             | 3                     | NWA8613                 |
| $\delta^{17}\text{O}$ | $\delta^{18}\text{O}$ | $\Delta^{17}\text{O}$ ‰ |
| -0.95                 | 5.07                  | -3.58                   |

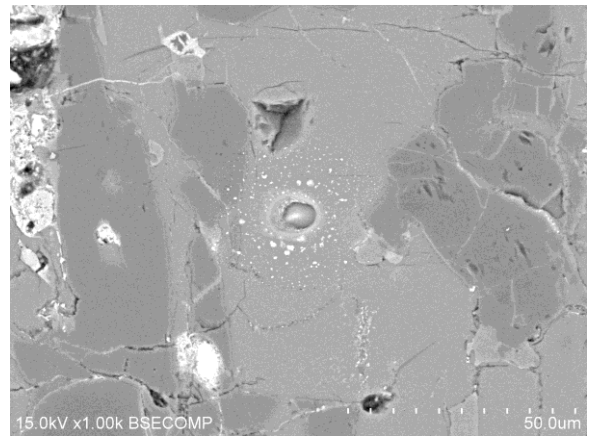

| Analysis              | Ch#                   | Chondrite               |
|-----------------------|-----------------------|-------------------------|
| N3: 42.pl             | 3                     | NWA8613                 |
| $\delta^{17}\text{O}$ | $\delta^{18}\text{O}$ | $\Delta^{17}\text{O}$ ‰ |
| 1.72                  | 9.41                  | -3.17                   |

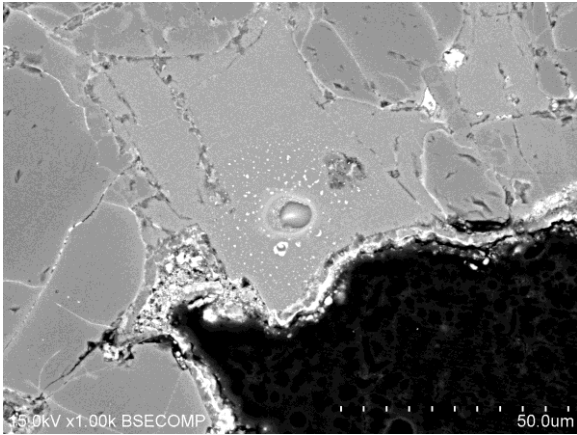

| Analysis              | Ch#                   | Chondrite               |
|-----------------------|-----------------------|-------------------------|
| N3: 43.pl             | 3                     | NWA8613                 |
| $\delta^{17}\text{O}$ | $\delta^{18}\text{O}$ | $\Delta^{17}\text{O}$ ‰ |
| 0.32                  | 6.03                  | -2.81                   |

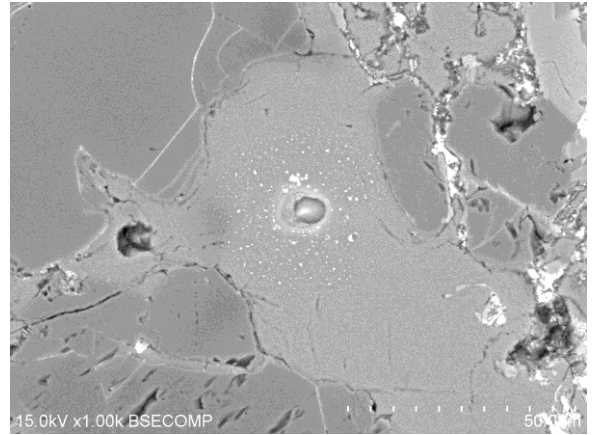

| Analysis              | Ch#                   | Chondrite               |
|-----------------------|-----------------------|-------------------------|
| N3: 44.pl             | 3                     | NWA8613                 |
| $\delta^{17}\text{O}$ | $\delta^{18}\text{O}$ | $\Delta^{17}\text{O}$ ‰ |
| 4.53                  | 11.74                 | -1.57                   |

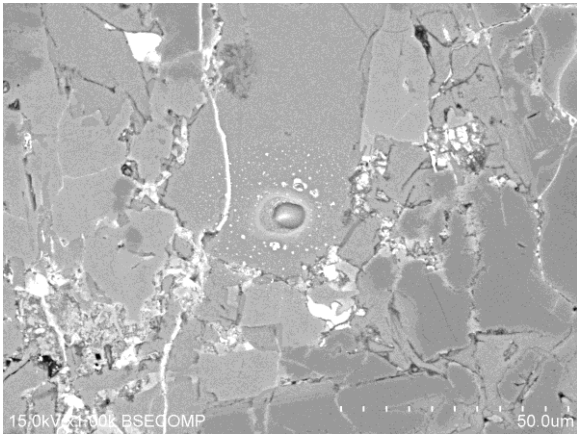

| Analysis              | Ch#                   | Chondrite               |
|-----------------------|-----------------------|-------------------------|
| N4: 45.pl             | 4                     | NWA8613                 |
| $\delta^{17}\text{O}$ | $\delta^{18}\text{O}$ | $\Delta^{17}\text{O}$ ‰ |
| 4.13                  | 11.82                 | -2.02                   |

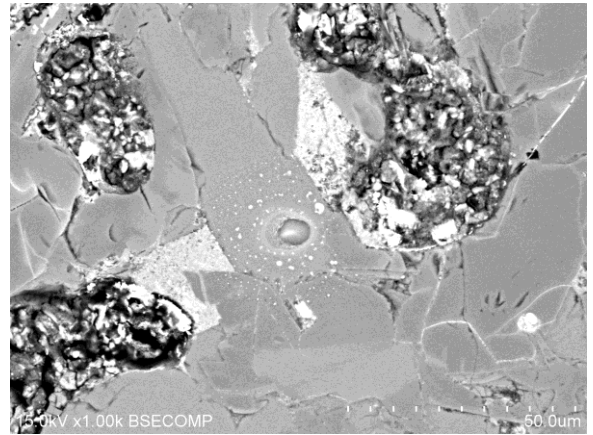

| Analysis              | Ch#                   | Chondrite               |
|-----------------------|-----------------------|-------------------------|
| N4: 46.pl             | 4                     | NWA8613                 |
| $\delta^{17}\text{O}$ | $\delta^{18}\text{O}$ | $\Delta^{17}\text{O}$ ‰ |
| 5.18                  | 13.00                 | -1.58                   |

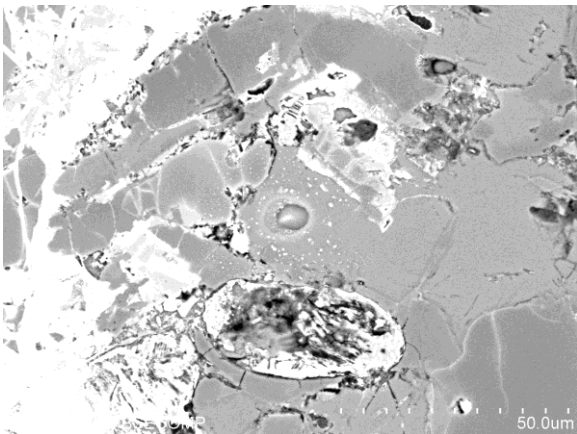

| Analysis              | Ch#                   | Chondrite               |
|-----------------------|-----------------------|-------------------------|
| N4: 47.pl             | 4                     | NWA8613                 |
| $\delta^{17}\text{O}$ | $\delta^{18}\text{O}$ | $\Delta^{17}\text{O}$ ‰ |
| 3.89                  | 11.66                 | -2.18                   |

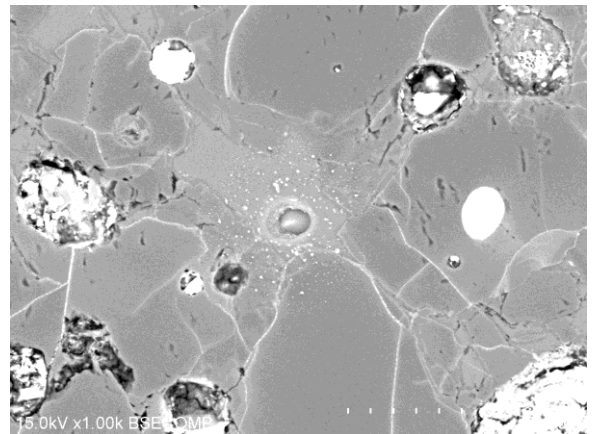

| Analysis              | Ch#                   | Chondrite             |   |
|-----------------------|-----------------------|-----------------------|---|
| N11: 48.pl (upper)    | 11                    | NWA8613               |   |
| $\delta^{17}\text{O}$ | $\delta^{18}\text{O}$ | $\Delta^{17}\text{O}$ | ‰ |
| 6.03                  | 14.03                 | -1.26                 |   |

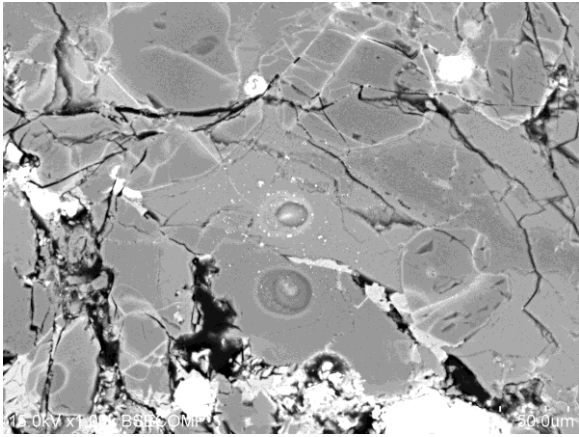

| Analysis              | Ch#                   | Chondrite             |   |
|-----------------------|-----------------------|-----------------------|---|
| N11: 49.pl            | 11                    | NWA8613               |   |
| $\delta^{17}\text{O}$ | $\delta^{18}\text{O}$ | $\Delta^{17}\text{O}$ | ‰ |
| 6.01                  | 14.08                 | -1.31                 |   |

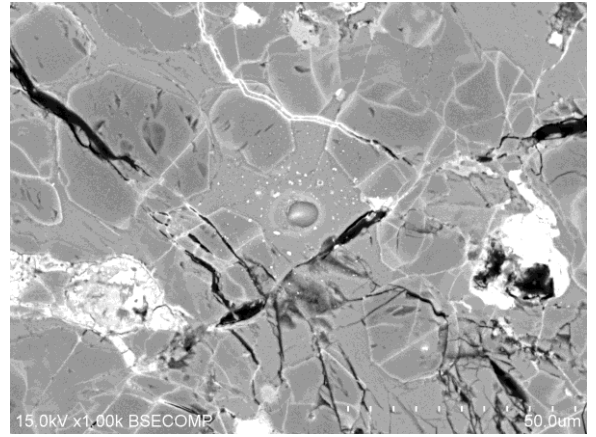

| Analysis              | Ch#                   | Chondrite             |   |
|-----------------------|-----------------------|-----------------------|---|
| N17: 50.pl            | 17                    | NWA8613               |   |
| $\delta^{17}\text{O}$ | $\delta^{18}\text{O}$ | $\Delta^{17}\text{O}$ | ‰ |
| 5.58                  | 13.83                 | -1.62                 |   |

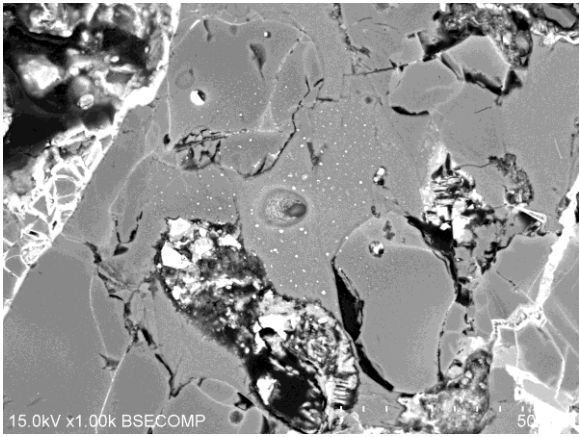

| Analysis              | Ch#                   | Chondrite             |   |
|-----------------------|-----------------------|-----------------------|---|
| N21: 51.pl            | 21                    | NWA8613               |   |
| $\delta^{17}\text{O}$ | $\delta^{18}\text{O}$ | $\Delta^{17}\text{O}$ | ‰ |
| 2.13                  | 8.73                  | -2.41                 |   |

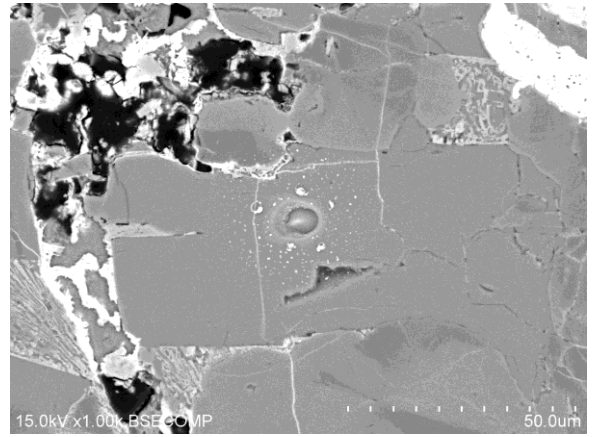

| Analysis              | Ch#                   | Chondrite             |   |
|-----------------------|-----------------------|-----------------------|---|
| N21: 52.pl (upper)    | 21                    | NWA8613               |   |
| $\delta^{17}\text{O}$ | $\delta^{18}\text{O}$ | $\Delta^{17}\text{O}$ | ‰ |
| 1.26                  | 7.13                  | -2.44                 |   |

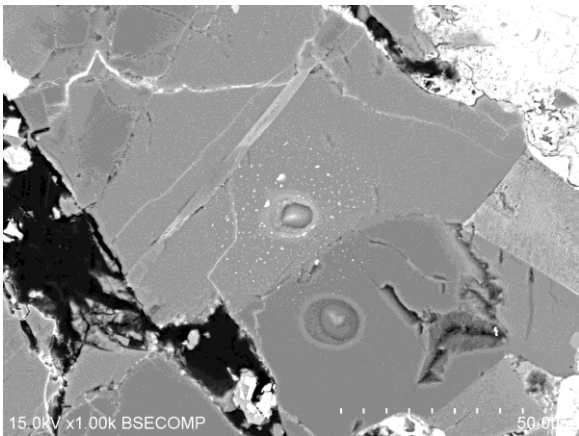

Supplement: NIHMS1567244-supplement-Sup7.pdf [file NIHMS1567244-supplement-Sup7.pdf]
