# Supplementary material
Source: PubMed Central journal article supplement (PMC7121232)

# Data S8

Grouped box charts showing  
minor element geochemistry  
of olivine

# Olivine minor element chemistry

b.d.l.: below detection limit

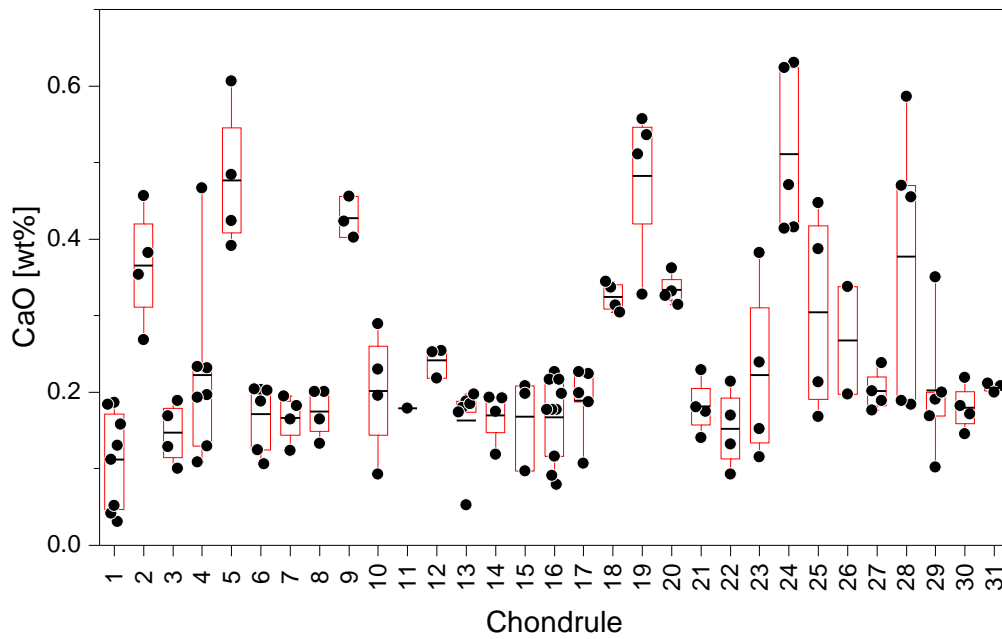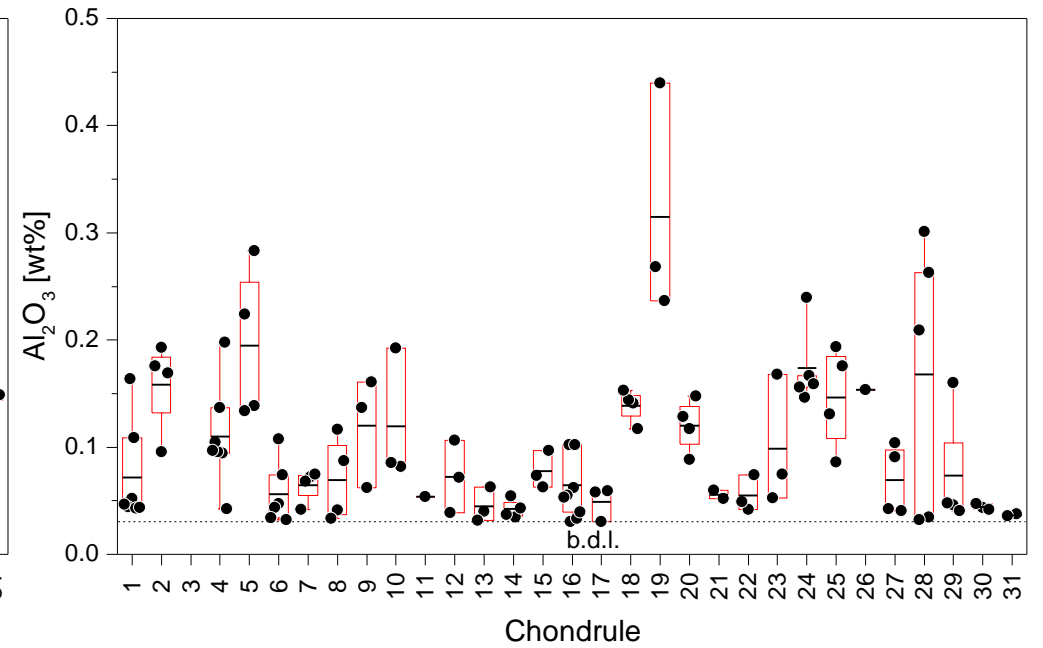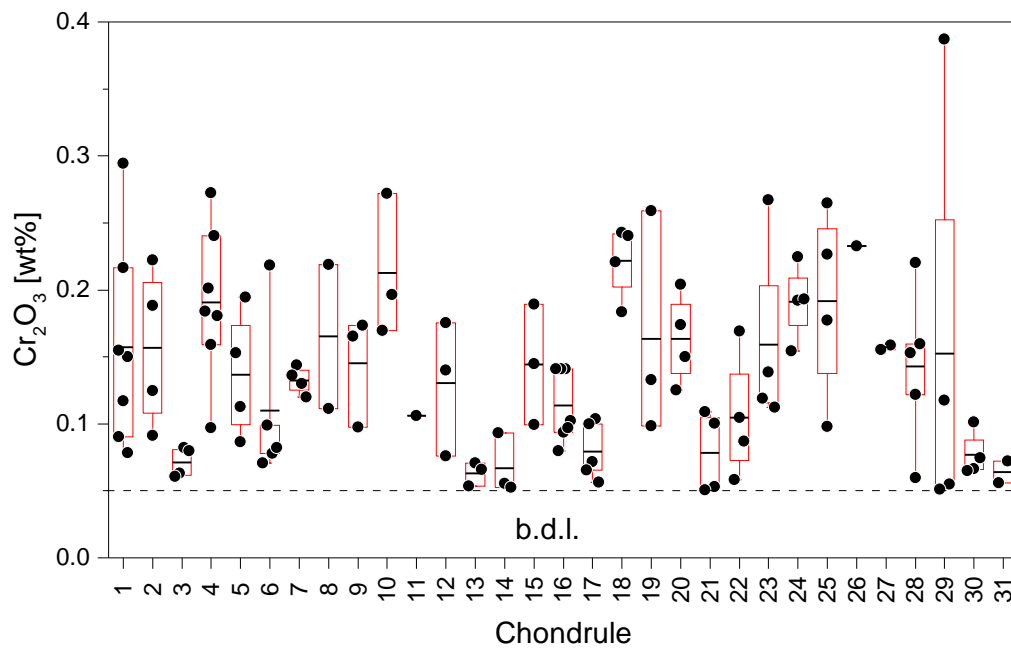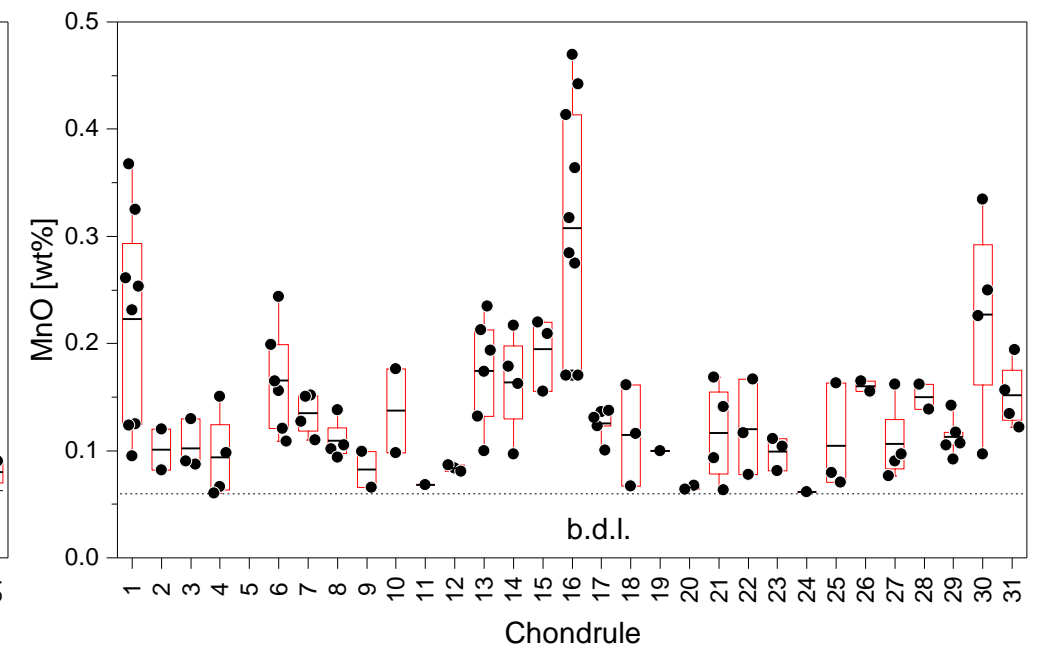

Supplement: NIHMS1567244-supplement-Sup8.pdf [file NIHMS1567244-supplement-Sup8.pdf]
